# Supplementary material
Source: PubMed Central journal article supplement (PMC7007572)
Supplement: pnas.1918477117.sapp.pdf [file pnas.1918477117.sapp.pdf]

# PNAS

[www.pnas.org](http://www.pnas.org)

Supplementary Information for

Transformative experience and social connectedness  
mediate the mood-enhancing effects of psychedelic use in naturalistic  
settings

Matthias Forstmann, Daniel A. Yudkin, Annayah M.B. Prosser, S. Megan Heller, &  
Molly J. Crockett

Matthias Forstmann

Email: [matthias.forstmann@mail.com](mailto:matthias.forstmann@mail.com)

**This PDF file includes:**

Supplementary text SOM1  
Figures SOM1-1 to SOM1-2  
Table SOM1-1  
Tables SOM2-1 to SOM2-83  
Tables SOM3-1 to SOM3-25  
Materials (SOM4)

Supplementary Materials I: Psychedelics and transformative experiences (Additional methods and results)

Matthias Forstmann<sup>1,2</sup>, Daniel A. Yudkin<sup>1</sup>, Annayah M. B. Prosser<sup>3</sup>, S. Megan Heller<sup>4</sup>, & Molly J. Crockett<sup>1</sup>

<sup>1</sup> University of Cologne, Department of Psychology

<sup>2</sup> Yale University, Department of Psychology

<sup>3</sup> University of Bath, Department of Psychology

<sup>4</sup> University of California, Los Angeles, Department of Anthropology

Supplementary Materials I: Psychedelics and transformative experiences (Additional methods and results)

**Additional Results for Variables reported in the Main Document.**

To keep the main document as concise as possible, some of the analyses for the variables reported there can be found here. In addition, the SOM II include the automatically generated tables for the analyses reported both here and in the main document.

**Main results when excluding participants under the (residual) influence of a psychedelic substance.**

Matching the results of our primary analysis, when excluding participants under the residual influence of a psychedelic substance, very recent (but not moderately recent) psychedelic substance use still predicted TEs,  $b = 0.99$  ( $\beta = 0.18$ ),  $SE = 0.17$ ,  $p < .001$ , 95% CI = [0.64; 1.33], ETEs,  $b = 0.51$  ( $\beta = 0.10$ ),  $SE = 0.17$ ,  $p = .002$ , 95% CI = [0.18; 0.83], social connectedness,  $b = 0.33$  ( $\beta = 0.08$ ),  $SE = 0.14$ ,  $p = .018$ , 95% CI = [0.06; 0.60], as well as positive mood,  $b = 0.26$  ( $\beta = 0.12$ ),  $SE = 0.09$ ,  $p < .001$ , 95% CI = [0.13; 0.40].

As in the main analysis, both TE (indirect effect:  $b = 0.06$  ( $\beta = 0.03$ ),  $SE = 0.02$ ,  $p < .001$ , 95% CI = [0.03; 0.10]) and social connectedness (indirect effect:  $b = 0.04$  ( $\beta = 0.02$ ),  $SE = 0.02$ ,  $p = .024$ , 95% CI = [0.00; 0.07]), individually mediated the effect of very recent psychedelic substance use on positive mood (Similar results can be observed for the undifferentiated recent substance use scores; see SOM II).

In the full SEM, the total effect of very recent psychedelic use on mood ( $b = 0.24$  ( $\beta = 0.11$ ),  $SE = 0.07$ ,  $p < .001$ , 95% CI = [0.10; 0.38]) was partially explained by a total indirect effect ( $b = 0.08$  ( $\beta = 0.04$ ),  $SE = 0.02$ ,  $p < .001$ , 95% CI = [0.04; 0.13]), comprising two significant indirect effects: via TE,  $b = 0.05$  ( $\beta = 0.03$ ),  $SE = 0.01$ ,  $p < .001$ , 95% CI = [0.03; 0.08], and via

TE and social connectedness in sequence,  $b = 0.01$  ( $\beta < 0.01$ ),  $SE < 0.01$ ,  $p = .002$ , 95% CI = [0.00; 0.02]. Controlling for the indirect effect still produced a significant direct effect of very recent psychedelic substance use on mood,  $b = 0.16$  ( $\beta = 0.07$ ),  $SE = 0.08$ ,  $p = .021$ , 95% CI = [0.02; 0.29]. These results speak to the fact that participants in our study were for the most part not significantly affected by any residual effects of psychedelic substances taken over the course of the day prior, and that we indeed assessed post-acute effects of these substances.

**Main results when excluding participants under the (residual) influence of any substance (except for nicotine).**

In addition, we repeated our main analyses, excluding participants under the influence of any psychoactive substance (despite nicotine, as specified in our pre-registration). Once more, very recent (but not moderately recent) psychedelic substance use still predicted TEs,  $b = 1.13$  ( $\beta = 0.19$ ),  $SE = 0.21$ ,  $p < .001$ , 95% CI = [0.73; 1.54], ETEs,  $b = 0.47$  ( $\beta = 0.08$ ),  $SE = 0.20$ ,  $p = .016$ , 95% CI = [0.09; 0.85], (marginally significantly) social connectedness,  $b = 0.31$  ( $\beta = 0.07$ ),  $SE = 0.17$ ,  $p = .067$ , 95% CI = [-0.02; 0.63], as well as positive mood,  $b = 0.31$  ( $\beta = 0.13$ ),  $SE = 0.08$ ,  $p < .001$ , 95% CI = [0.14; 0.48].

As in the full sample, both TE (indirect effect:  $b = 0.08$  ( $\beta = 0.03$ ),  $SE = 0.02$ ,  $p < .001$ , 95% CI = [0.04; 0.12]) and (marginally significantly) social connectedness (indirect effect:  $b = 0.03$  ( $\beta = 0.01$ ),  $SE = 0.02$ ,  $p = .082$ , 95% CI = [0.00; 0.07]), mediated the effect of very recent psychedelic substance use on positive mood (see SOM II for additional results).

In the full SEM, the total effect of very recent psychedelic use on mood ( $b = 0.27$  ( $\beta = 0.12$ ),  $SE = 0.09$ ,  $p = .001$ , 95% CI = [0.10; 0.44]) was partially explained by a total indirect effect ( $b = 0.09$  ( $\beta = 0.04$ ),  $SE = 0.03$ ,  $p < .001$ , 95% CI = [0.04; 0.14]), comprising two significant indirect effects: via TE,  $b = 0.07$  ( $\beta = 0.03$ ),  $SE = 0.02$ ,  $p < .001$ , 95% CI = [0.03;

0.10], and via TE and social connectedness in sequence,  $b = 0.01$  ( $\beta < 0.01$ ),  $SE < .001$ ,  $p = .011$ , 95% CI = [0.00; 0.02]. Controlling for the indirect effect still produced a significant direct effect of very recent psychedelic substance use on mood,  $b = 0.18$  ( $\beta = 0.08$ ),  $SE = 0.08$ ,  $p = .031$ , 95% CI = [0.02; 0.35]. Evidently, these results are highly similar to the results for our analyses excluding participants under the residual influence of a psychedelic substance, which we discussed above. As such, it seems as if (residual) intoxication with any psychoactive substance at the time of recruitment did not meaningfully interfere with participants' responding to our questionnaire.

#### **Additional findings for transformative experiences.**

Unexpectedly, we found that use of cannabinoid products positively predicted reports of having had a transformative experience (TE),  $b = 0.27$  ( $\beta = .07$ ),  $SE = 0.13$ ,  $p = .036$ , 95% CI = [0.02; 0.53], albeit to a significantly weaker degree than did psychedelic substance use,  $z = 2.31$ ,  $p = .021$ . Use of alcohol negatively predicted TEs,  $b = -0.53$  ( $\beta = -.10$ ),  $SE = 0.14$ ,  $p < .001$ , 95% CI = [-0.80; -0.25].

*Quality of transformative experiences.* TEs were typically described as having been positive ( $n = 913$ ,  $M = 5.04$ ,  $SD = 1.62$ ), and not negative ( $n = 911$ ,  $M = 1.99$ ,  $SD = 1.37$ ), with an on-average medium extent,  $n = 944$ ,  $M = 3.47$ ,  $SD = 1.76$ . In addition, people were only moderately inclined to state that their experience significantly affected their moral values,  $n = 1163$ ,  $M = 2.77$ ,  $SD = 1.89$ .

A subset of participants was asked how quickly the perceived transformation occurred (from 1 (*very sudden*) to 7 (*very gradual*)). Although we only asked this question at one event (Event 4), people who had a TE and used psychedelic substances described their TE as occurring more gradually ( $M = 5.65$ ,  $SD = 1.00$ ), than did non-psychedelic users ( $M = 4.70$ ,  $SD = 1.70$ ),

$t(44.55) = 2.90, p = .006$ .

Specifically addressing epistemically transformative experiences (ETEs), participants at four of the six events provided data indicating that they were rather glad that they had such an experience ( $n = 645, M = 5.21, SD = 1.96$ ), while participants at two events provided data indicating a descriptively rather non-substantial change in moral values as a result of this specific experience ( $n = 221, M = 2.33, SD = 1.84$ ).

*Expectations and desires for transformative experiences.* Use of cannabinoid products positively predicted the desire to have a TE,  $b = 0.59$  ( $\beta = .14$ ),  $SE = 0.13, p < .001$ , 95% CI = [0.33; 0.85], while alcohol use was negatively related to this desire,  $b = -0.54$  ( $\beta = -.10$ ),  $SE = 0.15, p < .001$ , 95% CI = [-0.84; -0.24].

Likewise, use of cannabinoids,  $b = 0.38$  ( $\beta = .10$ ),  $SE = 0.13, p = .003$ , 95% CI = [0.13; 0.62], was positively associated with expectations of having a TE, while use of alcohol once more negatively predicted this variable,  $b = -0.25$  ( $\beta = -.05$ ),  $SE = 0.15, p = .086$ , 95% CI = [-0.53; 0.04].

Interestingly, controlling for people's expectations and desires, use of cannabinoids no longer revealed a relationship with people's reports of having had a TE,  $b = 0.08$  ( $\beta = .02$ ),  $SE = 0.12, p = .541$ , 95% CI = [-0.17; 0.32], while alcohol use remained a significantly negative predictor of TEs,  $b = -0.53$  ( $\beta = -.10$ ),  $SE = 0.14, p < .001$ , 95% CI = [-0.80; -0.25].

In sum, while cannabinoid use originally predicted TEs, this relationship seems to be fully explained by people's preconceived desires and expectations of having such an experience, rather than use of the substance per se. In addition, we unexpectedly found alcohol use to be negatively associated with TEs.

*Epistemically transformative experiences.* In addition to the results reported in the main

document, we found that both use of cannabinoid products,  $b = 0.25$  ( $\beta = .06$ ),  $SE = 0.13$ ,  $p = .044$ , 95% CI = [0.01; 0.50], and stimulants,  $b = 0.40$  ( $\beta = .08$ ),  $SE = 0.16$ ,  $p = .013$ , 95% CI = [0.08; 0.71], predicted reports of having an ETE. As with TEs, alcohol use predicted the outcome variable negatively,  $b = -0.84$  ( $\beta = -.17$ ),  $SE = 0.15$ ,  $p < .001$ , 95% CI = [-1.13; -0.56].

*Difference in first time psychedelic use and non-first time use.*

In our pre-registration, we hypothesized that first-time use of psychedelic substances would be more strongly related to TEs than non-first-time use.

Of all participants who recently used a psychedelic substance ( $n = 326$ ), only 4.0% ( $n = 13$ ) took the substance for the first time ever, making differences between first-time users and non-first-time users difficult to interpret. In our pre-registration, we hypothesized that first time use of psychedelic substances would have larger effects on TEs than non-first-time use.

However, amongst participants who did recently use psychedelic substances, first-time use ( $M = 4.38$ ,  $SD = 1.26$ ) did not elicit self-reports of TEs to a greater degree than non-first-time use ( $M = 4.96$ ,  $SD = 1.86$ ),  $t(14.29) = 1.58$ ,  $p = .136$ . For ETEs, on the other hand, we found a marginally significant difference between first-time use ( $M = 2.54$ ,  $SD = 1.66$ ) and non-first-time use ( $M = 3.38$ ,  $SD = 2.05$ ), yet in the opposite direction,  $t(13.57) = 1.78$ ,  $p = .098$ . As such, it seems as if first-time use of psychedelic substances does not substantially affect the likelihood of having had a TE. If at all, the data hint at the possibility that first-time use, which can be quite challenging for some, may be associated with a decreased likelihood of having such an experience. Given the small number of first-time users in our data set, however, answering this question would require additional studies.

**Additional findings for mood.**

Results of the mediation analysis (including TEs as a mediator) reported in the main

document further revealed that, although alcohol use was negatively related to both TEs and mood, producing a significant indirect effect,  $b = -0.04$  ( $\beta = -0.02$ ),  $SE = 0.01$ ,  $p = .001$ , 95% CI =  $[-0.07; -0.02]$ , controlling for TEs still produced a marginally significant negative relationship between the two variables,  $b = -0.10$  ( $\beta = -0.05$ ),  $SE = 0.06$ ,  $p = .101$ , 95% CI =  $[-0.21; 0.02]$ . As such, it seems as if the negative relationship between alcohol use and mood can to some extent be explained by alcohol users having fewer feelings of transformation. In addition, a possible explanation for the residual relationship could be that prior alcohol use physically affected participants more negatively at the time of the survey (which was oftentimes run in the morning), which may in turn have negatively affected their affective state.

#### **Exploratory analysis of alcohol use.**

When analyzing the relationships between the different classes of psychoactive substance use and the outcome variables detailed above, we observed a noteworthy pattern related to alcohol use in our data. Using the sum scores representing substance use at any point during the event, we found that alcohol use negatively predicted all outcome variables examined in this study. Specifically, alcohol use negatively predicted TEs,  $b = -0.70$  ( $\beta = -0.13$ ),  $SE = 0.15$ ,  $p < .001$ , 95% CI =  $[-0.99; -0.40]$ , even when controlling for people's expectations and desires to have such experiences,  $b = -0.53$  ( $\beta = -0.10$ ),  $SE = 0.14$ ,  $p < .001$ , 95% CI =  $[-0.80; -0.25]$ . Similarly, it negatively affected ETes,  $b = -0.84$  ( $\beta = -0.17$ ),  $SE = 0.15$ ,  $p < .001$ , 95% CI =  $[-1.13; -0.56]$ , also when controlling for the corresponding expectations and desires,  $b = -0.73$  ( $\beta = -0.15$ ),  $SE = 0.14$ ,  $p < .001$ , 95% CI =  $[-1.01; -0.45]$ .

Likewise, we found that alcohol use negatively predicted feelings of social connectedness,  $b = -0.19$  ( $\beta = -0.05$ ),  $SE = 0.12$ ,  $p = .104$ , 95% CI =  $[-0.43; 0.04]$ , as well as positive mood,  $b = -0.15$  ( $\beta = -0.08$ ),  $SE = 0.06$ ,  $p = .011$ , 95% CI =  $[-0.27; -0.04]$ . In other

words, it seems as if alcohol use had inverse effects to those we found for psychedelic substance use.

In moderate doses, alcohol consumption is known to cause an acute increase in mood and euphoria, as well as a decrease in anxiety and social inhibition. Yet, regardless of these immediate effects, research has also shown that alcohol use negatively affects people's affective state the day after consumption, especially after excessive use (10). The present results provide further support for this notion. Alcohol use within the last few days predicted lower levels of psychological wellbeing among the participants in our study. In addition, alcohol use was negatively associated with people's tendency to report having had a TE, as well as their self-reported feelings of connectedness to others. Given that alcohol was the most frequently used substance in our sample (Figure 1, Main Document), we considered these observations worthy of further discussion.

Yet, as with our main findings on psychedelic substance use, causal directionality of the relationship between the variables remains unclear. Theoretically, it is possible that happier (or more socially connected) individuals felt a lesser urge to consume alcohol in the setting in which the present study took place.

We note, however, that these findings should be interpreted with caution. The present study was designed to test for post-acute effects of psychedelic substances, and to only control for the recent use of substances from other substance classes. All substances have unique subjective and objective acute and post-acute effects. Alcohol, in particular, has both pleasant and unpleasant stimulatory and sedative effects, which have different temporal dynamics and can substantially differ between individuals (11). Acutely, the stimulatory effects can increase euphoria, feelings of elation, and disinhibition, all of which should positively affect our outcome

measures. Post-acute effects of alcohol use, however, may include negative physiological symptoms (a “hangover”) that negatively affect mood (10), which are unrelated to an evaluation of the acute experience. It is therefore possible, that social alcohol use may positive effects on feelings of social connectedness after the immediate post-acute effects have subsided. As becomes evident, a proper analysis of these exploratory findings goes beyond the scope of the present work. Yet, they may stimulate future research projects investigating the effects of alcohol use at multi-day mass gatherings in more detail.

### **Additional Methods for Variables Included in the Pre-registration.**

In addition to the variables reported in the main document, we predicted that psychedelics-induced TEs (and the resulting increases in social connectedness) would have downstream consequences on people’s responses on a variety of tasks assessing interpersonal trust, generosity, perspective-taking, feelings of social fusion, and moral judgments.

#### **Proposed downstream consequences on socio-centric perspective taking.**

Prior to completing the questionnaire, participants engaged in a task assessing their inclination to take an egocentric vs. socio-centric perspective. This task was originally developed by Galinsky and colleagues (9), and requires participants to use a pen to draw the letter E on their forehead. Participants tend to either draw an E that would look correct from their own perspective (egocentric perspective) or from the perspective of an observer (socio-centric perspective). Socio-centric perspectives were coded 1, while egocentric perspectives were coded 0. As such, higher mean values indicate greater propensity of a group of participants to spontaneously adopt a socio-centric perspective, serving as a proxy for participants’ inclination to take others’ perspective.

We hypothesized that recent use of psychedelic substances would predict greater social connectedness and through that—since people should appreciate the mental states of others to a greater extent when including them in their self-construal (5)—a more pronounced inclination to take a socio-centric perspective.

**Proposed downstream consequences for feelings of social fusion.**

We also decided to investigate people’s feelings of social fusion—a construct closely related to the more abstract concept of “inclusion of others in the self”, or social connectedness. Specifically, construing one’s self as incorporating other members of a given group may facilitate feelings of belonging to that group (also referred to as *social inclusion*). Yet, such feelings may not exclusively be a function of heightened feelings of social connectedness, but could in the case of psychedelic substances also result from certain insights gained as part of undergoing a mystical-type experience. In fact, recent studies provided initial evidence that psilocybin can foster feelings of interpersonal connectedness as a function of having such an experience (4). The need to belong is a fundamental human desire (1), and social exclusion or rejection are associated, for example, with anti-social (2) and self-defeating behavior (3). As such, we decided to additionally assess social fusion/inclusion and its relation to both psychedelic substance social connectedness.

Similar to the social connectedness scale described in the main manuscript, participants were presented with five different constellations of two circles, one smaller than the other, with varying degrees of overlap ranging from full separation to full inclusion of the smaller circle in the larger circle. The smaller circle was labelled “Self” while the larger circle was labelled “Group”. Participants were asked to “circle the image below that [they] feel best represents [their] relationship with other [attendees] as a group”, coded 1 to 5, with higher values indicating

greater perceived inclusion. Therefore, while the social connectedness scale was aimed at capturing people’s self-construal with regard to the incorporation of other human beings, the social fusion scale more directly assessed people’s perceived inclusion in the social group of event attendees.

We predicted that recent use of psychedelic substances would lead to greater social connectedness, which in turn would increase feelings of social fusion with the larger group of event attendees.

**Proposed downstream consequences on trust / pro-sociality.**

In addition to the basic effects of psychedelic substance use on our main dependent variables, we pre-registered a set of hypothesized downstream consequences that a more socially inclusive self-construal or greater reports of TEs would have as a function of recent psychedelic substance use. Some tasks were conducted with the help of additional equipment (envelopes, special pens), and were run prior to participants completing the remainder of the questionnaire.

*Dictator Game.* Participants at all events<sup>1</sup> were given the opportunity to take part in a classic dictator game (8), with the chance of winning a number of lottery tickets that could later be redeemed for prizes. Specifically, all participants were handed an envelope containing 10 tickets and were told that tickets could later be exchanged for “mystery prizes”, with more desirable items requiring more tickets. Participants were then told:

*Now you have a choice: You can keep all 10 tickets for yourself. Or, you may give as many tickets as you would like to an anonymous stranger by placing them back in the envelope and returning the envelope to us. We will then give these tickets to another person at the event.*

---

<sup>1</sup> At Event 2, only half of the participants played the dictator game, while the other half played a trust game.

*This person will not be told anything about where the tickets came from; they will simply get to enjoy the tickets (and the prizes) for themselves.*

Subsequently, participants received additional information about the confidentiality of their responses, were instructed to put the number of tickets they wanted to give away in an envelope, and to seal the envelope. Envelopes were only opened after the events were over. The number of tickets given to an anonymous stranger served as our measure of prosocial or altruistic inclinations, with scores ranging from 0 (no tickets given away) to 10 (all tickets given away).

While this dictator game was played at all events, participants at some events played for a different total number of tickets. At Event 4, participants were given the chance to keep or give away up to 6 tickets, while at Event 1, they were instructed to distribute a total of 5 tickets. At all other events, participants were given 10 tickets to distribute. Before analyzing the data, we rescaled participants' scores from the two events with different ticket numbers to match the 0-10 scale obtained at the other events.

We predicted that a more socially inclusive self-construal would lead to greater pro-social inclinations (in the form of more tickets given to an anonymous receiver) as a consequence of recent use of psychedelic substances.

*Trust Game.* Some participants at Event 1 played a different economic game using the tickets handed to them, namely a classic “trust game” (7). Specifically, participants were provided with 4 tickets and were told that they could choose how many of those tickets to keep for themselves and how many to send to an anonymous third party—Person B. As in the dictator game, they were further told that they could use the tickets to redeem prizes. They then received additional information about what would happen to the tickets in case they decided to send them to Person B:

*You can keep all 4 tickets for yourself. Or, you may send as many tickets as you would like to Person B by placing them back in the envelope and returning the envelope to us. We will then double the number of tickets that you give to person B. When Person B begins this experiment, they will receive their 4 tickets, as well as your doubled donation. Then, Person B can choose how many of the tickets to keep for themselves and how many tickets to send back to you. Their donation will NOT be doubled as yours was.*

Subsequently, participants received more information about the confidentiality of their responses, were asked to put the number of tickets they wanted to send to Person B in an envelope, and to seal it. As in the dictator game, responses were coded such that higher values represent more tickets given to an anonymous stranger, ranging from 0 (no tickets sent) to 4 (all tickets sent), with higher scores indicating greater trust in the third party.

We predicted that a more socially inclusive self-construal would lead to greater trust in a stranger (in the form of more tickets sent to him or her) as a consequence of recent use of psychedelic substances. Importantly, the trust game was only played with half of the participants at Event 1, reducing the sample size to 174 participants.

*Give-to-a-Stranger.* As a final measure for prosocial inclinations, participants worked on a task assessing their hypothetical willingness to financially help a stranger<sup>2</sup>. Specifically, they responded to a single item that read:

*“Suppose you were given \$100, and had the opportunity to give any amount of money from \$0 to \$100 to a random stranger. This person would never know who gave them the money,*

---

<sup>2</sup> This prosociality measure was not included in the Event 1 questionnaire, reducing the total N for this measure to 1061.

*and would not know how much money you were originally given. If you were given \$100, how much (from 0-\$100) would you give to a random stranger?”*. Participants gave responses ranging from 0-100, with higher values indicating greater prosocial inclinations.

In line with the theorizing outlined above, we predicted that a more socially inclusive self-construal would lead to greater pro-social behavior (in the form of willingness to financially help out a stranger) as a consequence of recent use of psychedelic substances.

### **Proposed downstream consequences on conceptualizations of morality.**

Lastly, we investigated whether of an increase in social connectedness would predict people’s conceptualization of what they think constitutes praiseworthy moral behavior as a function of recent psychedelic substance use. Research suggests that people’s evaluation of moral actions is determined by two separate processes: outcome and action valuation. *Outcome valuation* pertains to the value people ascribe to the benefit that a certain action confers, while *action valuation* pertains to the hedonistic value people associate with a deed—that is, how good it feels to perform. For example, people’s evaluation of how praiseworthy it is to give money to a homeless person may be driven by how good they think it feels to give the money, and/or by how positively they evaluate the potential benefits for the recipient.

To assess how sensitive they are to actions and outcomes in their judgments of moral praiseworthiness, we asked participants to evaluate a set of 23 good deeds in terms of how praiseworthy they think each of these deeds is, using a 7-point Likert-type scale ranging from “*The LEAST praiseworthy a good deed could be*” to “*The MOST praiseworthy a good deed could be*”.

The same 23 items were—in an independent pretest—presented to two group of subjects. One group rated each item in terms of how good the deed described would feel to perform, while

a second group rated the items in terms of how beneficial they thought each of the deeds would be to a recipient. As such, for each deed we ended up with two scores, representing its action and outcome value.

Using the present data, we calculated for each participant how much the action and outcome values of each items predicted the participant's praiseworthiness ratings of that item. We thereby ended up with two regression weights for each participant, one indicating the degree to which that person's praiseworthiness ratings were sensitive to action values (action valuation) and outcome values (outcome valuation), respectively.

We hypothesized that psychedelic use would—via an increase in social connectedness—positively predict people's sensitivity to the outcome of a certain action (a by-definition social consideration) rather than the hedonic value of the action itself (a by-definition non-social consideration), in der judgment of moral praiseworthiness.

### **Additional Results for Variables Included in the Pre-registration.**

Based on the hypothesized relation between psychedelic use, social connectedness, and TEs, we proposed a set of downstream consequences that higher values on the latter two construct might have as a function of psychedelic substance use.

#### **Socio-centric perspective taking.**

As described above, we predicted that an increase in social connectedness would facilitate adopting a socio-centric perspective (5) as a function of psychedelic substance use.

Providing moderate support for our hypothesis, an initial regression analysis using perspective taking (binary-coded) as a criterion revealed that it was indeed significantly predicted by recent psychedelic use,  $b = 0.06$  ( $\beta = 0.07$ ),  $SE = 0.03$ ,  $p = .043$ , 95% CI = [0.00;

0.12]. In addition, we unexpectedly found that adopting a socio-centric perspective was negatively predicted by use of inhalants,  $b = -0.14$  ( $\beta = -0.10$ ),  $SE = 0.05$ ,  $p = .003$ , 95% CI = [-0.24; 0.05], and marginally significantly predicted by recent use of benzodiazepines,  $b = 0.11$  ( $\beta = 0.06$ ),  $SE = 0.07$ ,  $p = .085$ , 95% CI = [-0.02; 0.24].

To test for mediation, we added social connectedness as an additional predictor to the model. However, social connectedness did not significantly predict socio-centric perspective taking,  $b = 0.00$  ( $\beta = 0.01$ ),  $SE = 0.01$ ,  $p = .667$ , 95% CI = [-0.01; 0.02], and did not affect the statistical significance of the substance use predictor variables. In other words, the finding that psychedelic substance use predicted socio-centric perspective taking must be explained by a process unrelated to social connectedness.

Although the literature considers perspective taking and self-other overlap (or social connectedness) two closely related constructs, it typically refers to self-other overlap with a specific target, rather than an unspecified group of people. Had an individual target been introduced, people high in social connectedness may have been more inclined to take that person's perspective.

#### **Feelings of social fusion / inclusion.**

We hypothesized that greater inclusion of others in the self, or feelings of social connectedness, would foster in participants a greater sense of social fusion with (or social inclusion in) the group of event attendees. And indeed, in a separate analysis (excluding two events for which social fusion was not assessed<sup>3</sup>), we found that recent use of psychedelic

---

<sup>3</sup> Including all events and using FIML to estimate missing values for the two events revealed mostly identical results.

substances positively predicted this feeling of inclusion,  $b = 0.19$  ( $\beta = 0.08$ ),  $SE = 0.09$ ,  $p = .035$ , 95% CI = [0.01; 0.37]. To test for whether a self-construal incorporating others statistically mediated the relationship between recent psychedelic use and feelings of social fusion, we designed a model in which both social connectedness and social fusion were regressed on the different classes of substance use as well as demographic variables. In addition, we added a regression path from social connectedness to feelings of social fusion. Analyzing the results, we found that social connectedness indeed significantly predicted feelings of social fusion,  $b = 0.24$  ( $\beta = 0.35$ ),  $SE = 0.02$ ,  $p < .001$ , 95% CI = [0.20; 0.28]. When combined, both individual paths produced a statistically significant indirect effect between recent use of psychedelics and social fusion via social connectedness,  $b = 0.08$  ( $\beta = 0.03$ ),  $SE = 0.03$ ,  $p = .013$ , 95% CI = [0.02; 0.15]. Inclusion of this indirect effect reduced the relationship between recent use of psychedelics and feelings of social fusion to non-significance,  $b = 0.11$  ( $\beta = 0.05$ ),  $SE = 0.09$ ,  $p = .211$ , 95% CI = [-0.06; 0.27].

In sum, the present data supports the hypothesis that recent use of psychedelic substances positively predicts feelings of fusion with (or inclusion in) a group of event attendees via an increased tendency to construe the self in terms of an inclusion of others.

In addition, in the mediation analysis, we found an unexpected, significantly positive relationship between use of stimulants and social fusion that was not explained by social connectedness,  $b = 0.26$  ( $\beta = 0.10$ ),  $SE = 0.09$ ,  $p = .005$ , 95% CI = [0.08; 0.44], as well as to two marginally significant negative relationships between use of narcotics,  $b = -0.42$  ( $\beta = -0.07$ ),  $SE = 0.25$ ,  $p = .092$ , 95% CI = [-0.91; 0.07], and “other substances”,  $b = -0.25$  ( $\beta = -0.06$ ),  $SE = 0.14$ ,  $p = .079$ , 95% CI = [-0.53; 0.03], and social fusion.

### **Dictator game.**

Analyzing whether recent use of psychedelic substances would have downstream consequences on allocations of lottery tickets in a dictator game via an increase in social connectedness, we found no significant mediation. In fact, in a simple regression analysis, use of psychedelics did not predict dictator game allocations,  $b = 0.20$  ( $\beta = 0.03$ ),  $SE = 0.25$ ,  $p = .419$ , 95% CI = [-0.29; 0.69]. Likewise, none of the other classes of psychoactive substances predicted allocations. Including social connectedness in the model revealed that social connectedness neither predicted dictator game allocations,  $b = 0.05$  ( $\beta = 0.03$ ),  $SE = 0.06$ ,  $p = .360$ , 95% CI = [-0.06; 0.17], nor did its inclusion affect the statistical (non-)significance of the other predictors.

*Trust Game.* Similarly, analyzing responses to the trust game played at one of the events ( $n = 174$  participants, excluding data from the remaining subjects), we did not find that use of psychedelic substances predicted lottery tickets allocated to an anonymous stranger,  $b = 0.29$  ( $\beta = 0.11$ ),  $SE = 0.23$ ,  $p = .210$ , 95% CI = [-0.16; 0.74]. Two significant relationships emerged, however, between number of tickets sent and recent use of inhalants,  $b = 0.79$  ( $\beta = 0.16$ ),  $SE = 0.39$ ,  $p = .042$ , 95% CI = [0.03; 1.54], and (negatively) narcotics,  $b = -2.14$  ( $\beta = -0.22$ ),  $SE = 1.03$ ,  $p = .037$ , 95% CI = [-4.15; -0.13], respectively. Inclusion of social connectedness as an additional predictor, which did likewise not predict trust game allocations,  $b < 0.01$  ( $\beta < 0.01$ ),  $SE = 0.05$ ,  $p = .972$ , 95% CI = [-0.10; 0.11], did not affect the statistical significance of these variables.

#### **Give-a-Stranger measure.**

Excluding participants from one event where this measure was not included in the questionnaire (Event 1), we also found for the give-a-stranger measure that it was neither predicted by recent use of psychedelic substances,  $b = 0.07$  ( $\beta = 0.03$ ),  $SE = 0.08$ ,  $p = .380$ , 95% CI = [-0.09; 0.23], nor by use of any of the other classes of substances (all  $ps > .262$ ).

Adding social connectedness as an additional predictor revealed that social connectedness indeed predicted how much money people would give to a random stranger,  $b = 0.09$  ( $\beta = 0.14$ ),  $SE = 0.02$ ,  $p < .001$ , 95% CI = [0.05; 0.13]. Inclusion of social connectedness did not render any of the other coefficients significant. As such, although recent use of psychedelics predicted social connectedness, and social connectedness predicted people's tendency to donate to an anonymous stranger (producing a significant indirect effect,  $b = 0.03$  ( $\beta = 0.02$ ),  $SE = 0.01$ ,  $p = .015$ , 95% CI = [0.01; 0.06]), there was no direct relationship (i.e., no total effect) between psychedelic substance use and people's prosocial inclinations on this measure.

### **Conceptualization of morality.**

Finally, we tested whether recent use of psychedelics affected people's conceptualization of morality. Specifically, as outlined above, we hypothesized that psychedelic use would predict people's conceptualization of praiseworthy moral behavior in terms of its outcomes rather than the hedonic value of the respective actions, mediated by an increase in social connectedness as a consequence of psychedelic use.

Regressing both scores on the previously used predictor variables and covariates, we found that action valuation and outcome valuation were expectedly negatively correlated,  $b = -0.09$  ( $\beta = -0.32$ ),  $SE = 0.01$ ,  $p < .001$ , 95% CI = [-0.11; -0.07]. Rejecting our hypothesis, results further revealed that recent use of psychedelics neither predicted action ( $b < 0.01$  ( $\beta < 0.01$ ),  $SE = 0.04$ ,  $p = .959$ , 95% CI = [-0.09; 0.08]) nor outcome valuation,  $b = -0.05$  ( $\beta = -0.03$ ),  $SE = 0.05$ ,  $p = .337$ , 95% CI = [-0.14; 0.05]. Unexpectedly, however, both conceptualizations of morality were predicted by use of substances from other classes. Action valuation was positively predicted by recent cannabinoid use,  $b = 0.10$  ( $\beta = 0.09$ ),  $SE = 0.04$ ,  $p = .010$ , 95% CI = [0.02; 0.17], negatively predicted by recent use of benzodiazepines,  $b = -0.19$  ( $\beta = -0.08$ ),  $SE = 0.10$ ,  $p$

= .047, 95% CI = [-0.38; -0.00], and (marginally significantly) other substances,  $b = -0.13$  ( $\beta = -0.06$ ),  $SE = 0.07$ ,  $p = .062$ , 95% CI = [-0.28; 0.01].

Outcome valuation, on the other hand, was positively—albeit only marginally significantly—predicted by recent alcohol use,  $b = 0.09$  ( $\beta = 0.06$ ),  $SE = 0.05$ ,  $p = .065$ , 95% CI = [-0.01; 0.18], and inhalant use,  $b = 0.15$  ( $\beta = 0.06$ ),  $SE = 0.08$ ,  $p = .067$ , 95% CI = [-0.01; 0.30]. In addition, this valuation was negatively predicted by cannabinoid use,  $b = -0.10$  ( $\beta = -0.09$ ),  $SE = 0.04$ ,  $p = .012$ , 95% CI = [-0.18; -0.02], as well as stimulant use,  $b = -0.10$  ( $\beta = -0.07$ ),  $SE = 0.05$ ,  $p = .041$ , 95% CI = [-0.21; 0.01]. As such, we did not find support for our hypothesis that people’s valuation of moral action/outcomes was specifically related to their recent use of psychedelic substances.

### **Structural Equation Model Including Social Fusion.**

In addition to the structural equation model reported in the paper, we tested a second model including the social fusion construct outlined above as a second dependent variable (see Figure 1-SOM).

#### **Structural equation model: TE, social connectedness, social fusion, and mood.**

As the model in the paper, given the comparably few degrees of freedom, the model revealed good fit to the data,  $\chi^2(6, N = 1225) = 3.76$ ,  $p = .710$ , CFI = 1.00, RMSEA = < 0.01, 90% CI<sub>RMSEA</sub> = [0.00; 0.03].

When controlling for expectations and desire, TEs were positively predicted by very recent psychedelic substance use,  $b = 0.79$  ( $\beta = 0.15$ ),  $SE = 0.16$ ,  $p < .001$ , 95% CI = [0.48; 1.09]. Likewise, social connectedness was marginally significantly predicted by very recent psychedelic substance use,  $b = 0.24$  ( $\beta = 0.06$ ),  $SE = 0.13$ ,  $p = .074$ , 95% CI = [-0.02; 0.49], yet

more substantially so by self-reported TEs,  $b = 0.11$  ( $\beta = 0.14$ ),  $SE = 0.02$ ,  $p < .001$ , 95% CI = [0.07; 0.15].

When it comes to the two outcome variables, TEs strongly predicted both mood ( $b = 0.07$  ( $\beta = 0.18$ ),  $SE = 0.01$ ,  $p < .001$ , 95% CI = [0.05 0.09]) and social fusion ( $b = 0.16$  ( $\beta = 0.31$ ),  $SE = 0.02$ ,  $p < .001$ , 95% CI = [0.13; 0.20]). Similarly, social connectedness positively predicted mood ( $b = 0.10$  ( $\beta = 0.21$ ),  $SE = 0.01$ ,  $p < .001$ , 95% CI = [0.08; 0.13]) and social fusion ( $b = 0.21$  ( $\beta = 0.30$ ),  $SE = 0.02$ ,  $p < .001$ , 95% CI = [0.17; 0.25]), when accounting for the significant intercorrelation between these two outcomes,  $b = 0.13$  ( $\beta = 0.18$ ),  $SE = 0.03$ ,  $p < .001$ , 95% CI = [0.08; 0.18].

Although descriptively pointing in the same direction, moderately recent psychedelic substance use did not significantly predict any of the variables included in the model. Based on these results, we specified three indirect effects of very recent psychedelic substance use on each of the two outcome variables: (1) via TEs, (2) via social connectedness alone, and (3) via TEs and social connectedness in sequence (see Figure 1-SOM).

Focusing on mood, three indirect effects emerged: via TEs,  $b = 0.05$  ( $\beta = 0.03$ ),  $SE = 0.01$ ,  $p < .001$ , 95% CI = [0.03; 0.08], via social connectedness,  $b = 0.02$  ( $\beta = 0.01$ ),  $SE = 0.01$ ,  $p = .082$ , 95% CI = [0.00; 0.05], and via both TEs and social connectedness,  $b = 0.01$  ( $\beta < 0.01$ ),  $SE < 0.01$ ,  $p = .001$ , 95% CI = [0.00; 0.01] in sequence. Controlling for these indirect effects reduces the total effect of very recent psychedelic substance use on mood ( $b = 0.21$  ( $\beta = 0.10$ ),  $SE = 0.07$ ,  $p = .002$ , 95% CI = [0.08; 0.33]) to marginal significance,  $b = 0.12$  ( $\beta = 0.06$ ),  $SE = 0.06$ ,  $p = .064$ , 95% CI = [-0.01; 0.25].

Focusing on social fusion, three significant indirect effects emerged: via TEs,  $b = 0.13$  ( $\beta = 0.05$ ),  $SE = 0.03$ ,  $p < .001$ , 95% CI = [0.07; 0.18], via social connectedness,  $b = 0.05$  ( $\beta =$

0.02),  $SE = 0.03$ ,  $p = .078$ , 95% CI = [-0.01; 0.11], and via both TEs and social connectedness in sequence,  $b = 0.02$  ( $\beta = 0.01$ ),  $SE = 0.01$ ,  $p < .001$ , 95% CI = [0.01; 0.03]. Controlling for the indirect effects reduces the direct effect of very recent psychedelic substance use to non-significance,  $b = 0.02$  ( $\beta = 0.01$ ),  $SE = 0.09$ ,  $p = .777$  95% CI = [-0.15; 0.19]. The total effect of very recent psychedelic substance use on social fusion was statistically significant,  $b = 0.22$  ( $\beta = 0.08$ ),  $SE = 0.09$ ,  $p = .019$ , 95% CI = [0.04; 0.41].

**Notes on data coding.**

When participants working on the paper-and-pencil versions of the questionnaires placed their crosses between two scale points (e.g., between 3 and 4), the midpoint between these scale points (e.g., 3.5) was coded as their response. In cases in which participants gave non-numerical answers on Likert-type items (e.g., by writing a note next to the item), these scores were treated as missing.

**Tables and Figures**

Table 1 SOM

*Events*

| Event | Year | Sample Size | Location       |
|-------|------|-------------|----------------|
| 1     | 2015 | 134         | USA            |
| 2     | 2016 | 346         | USA            |
| 3     | 2017 | 394         | USA            |
| 4     | 2016 | 100         | United Kingdom |
| 5     | 2016 | 168         | United Kingdom |
| 6     | 2016 | 83          | USA            |

Notes. Location, year, and sample sizes for the six events.



Figure 1 – SOM. Structural equation model including “social fusion” as a second criterion.



*Figure 2 – SOM.* Degree of transformative experience reported by users of different substance classes (during the last week or the last 24 hours). Note that due to use of substances from multiple substance classes, TE scores from participants factor into more than one category. Also note that some categories (e.g., Benzos, Narcotic Analgesics, Inhalants) comprise only a small number of participants (cf. Figure 1 – Main Document).

### References

- (1) Leary, M. R., & Baumeister, R. F. (2017). *The need to belong: Desire for interpersonal attachments as a fundamental human motivation*. In *Interpersonal Development* (pp. 57-89). Routledge.
- (2) Twenge, J. M., Baumeister, R. F., DeWall, C. N., Ciarocco, N. J., & Bartels, J. M. (2007). Social exclusion decreases prosocial behavior. *Journal of Personality and Social Psychology, 92*, 56-66.
- (3) Twenge, J. M., Catanese, K. R., & Baumeister, R. F. (2002). Social exclusion causes self-defeating behavior. *Journal of Personality and Social Psychology, 83*, 606-615.
- (4) Carhart-Harris, R. L., Erritzoe, D., Haijen, E., Kaelen, M., & Watts, R. (2018). Psychedelics and connectedness. *Psychopharmacology, 235*, 547-550.
- (5) Galinsky, A. D., Ku, G., & Wang, C. S. (2005). Perspective-taking and self-other overlap: Fostering social bonds and facilitating social coordination. *Group Processes & Intergroup Relations, 8*, 109-124.
- (6) Roberts, G., & Sherratt, T. N. (2002). Miller, D. T., Downs, J. S., & Prentice, D. A. (1998). Minimal conditions for the creation of a unit relationship: The social bond between birthdaymates. *European Journal of Social Psychology, 28*, 475-481.
- (7) Berg, J., Dickhaut, J., & McCabe, K. (1995). Trust, reciprocity, and social history. *Games and Economic Behavior, 10*, 122-142.
- (8) Hoffman, E., McCabe, K., Shachat, K., & Smith, V. (1994). Preferences, property rights, and anonymity in bargaining games. *Games and Economic Behavior, 7*, 346-380.
- (9) Galinsky, A. D., Magee, J. C., Inesi, M. E., & Gruenfeld, D. H. (2006). Power and perspectives not taken. *Psychological Science, 17*, 1068-1074.

(10) McKinney, A. (2010). A review of the next day effects of alcohol on subjective mood ratings. *Current Drug Abuse Reviews*, 3, 88-91.

(11) Hendler R. A., Ramchandani V. A., Gilman J., & Hommer D. W. (2011) Stimulant and sedative effects of alcohol. In: Sommer W., Spanagel R. (eds). *Behavioral Neurobiology of Alcohol Addiction. Current Topics in Behavioral Neurosciences, vol 13*. Berlin: Springer.

Supplementary Materials II: Psychedelics and transformative experiences (Tables for the  
main document)

Matthias Forstmann<sup>1,2</sup>, Daniel A. Yudkin<sup>1</sup>, Annayah M. B. Prosser<sup>3</sup>, S. Megan Heller<sup>4</sup>, &  
Molly J. Crockett<sup>1</sup>

<sup>1</sup> Yale University, Department of Psychology

<sup>2</sup> University of Cologne, Department of Psychology

<sup>3</sup> University of Bath, Department of Psychology

<sup>4</sup> University of California, Los Angeles, Department of Anthropology

Supplementary Materials II: Psychedelics and transformative experiences (Tables for the main document)

### **SOM II: Tables for Analyses Reported in the Main Document.**

In the following, we will provide tables for the analyses reported in the main document. Specifically, we will report results for the simple regressions and mediations, and for the structural equation model reported in main document. In addition, the same analyses will be reported differentiating between very recent (in the last 24 hours) and moderately recent use (in the week prior) of psychedelic substances. Then, the results from the main document, additionally controlling for the variable “number of days at the event” will be reported. Following this, as mentioned in the pre-registration, the main analyses will be reported including *only* those variables representing use of substances within the last 24 hours (24h only).

#### **Simple regressions**

The following tables represent results for the simple regression analyses reported in the main document. Tables include all predictors assessed, including use of substances from the various substance classes over the entire past week (i.e., a single indicator not differentiating between moderately (last week) and very recent (24h) use) as well the control variables specified in the pre-registration (some of which were dummy-coded).

Table 1

*Prediction of transformative experiences*

| Criterion | Predictor         | b     | SE   | z     | p                 | $CI_{lower}^{95\%}$ | $CI_{upper}^{95\%}$ | $\beta$ |
|-----------|-------------------|-------|------|-------|-------------------|---------------------|---------------------|---------|
| TE        | ← Psychedelics    | 0.79  | 0.15 | 5.13  | <.001***          | 0.49                | 1.09                | 0.17    |
| TE        | ← Nicotine        | 0.21  | 0.13 | 1.60  | .109              | -0.05               | 0.46                | 0.05    |
| TE        | ← Alcohol         | -0.70 | 0.15 | -4.65 | <.001***          | -0.99               | -0.40               | -0.13   |
| TE        | ← Stimulants      | 0.27  | 0.17 | 1.60  | .109              | -0.06               | 0.60                | 0.05    |
| TE        | ← Euphorics       | 0.23  | 0.16 | 1.46  | .145              | -0.08               | 0.55                | 0.05    |
| TE        | ← Cannabinoids    | 0.27  | 0.13 | 2.09  | .036*             | 0.02                | 0.53                | 0.07    |
| TE        | ← Benzodiazepines | 0.08  | 0.34 | 0.24  | .807              | -0.59               | 0.76                | 0.01    |
| TE        | ← Inhalants       | -0.23 | 0.25 | -0.91 | .363              | -0.72               | 0.26                | -0.03   |
| TE        | ← Narcotics       | -0.20 | 0.42 | -0.48 | .634              | -1.03               | 0.63                | -0.02   |
| TE        | ← Others          | 0.28  | 0.26 | 1.06  | .287              | -0.23               | 0.79                | 0.03    |
| TE        | ← Gender_1        | -0.06 | 0.43 | -0.13 | .895              | -0.89               | 0.78                | -0.01   |
| TE        | ← Gender_2        | 0.05  | 0.43 | 0.11  | .910              | -0.79               | 0.88                | 0.01    |
| TE        | ← Education_1     | 0.15  | 0.27 | 0.55  | .579              | -0.37               | 0.67                | 0.02    |
| TE        | ← Education_2     | 0.37  | 0.18 | 2.02  | .044*             | 0.01                | 0.73                | 0.08    |
| TE        | ← Education_3     | -0.38 | 0.20 | -1.89 | .059 <sup>†</sup> | -0.76               | 0.01                | -0.06   |
| TE        | ← Education_4     | 0.07  | 0.16 | 0.43  | .668              | -0.25               | 0.38                | 0.02    |
| TE        | ← Age             | 0.00  | 0.01 | -0.13 | .897              | -0.01               | 0.01                | 0.00    |
| TE        | ← Religion        | 0.15  | 0.04 | 4.24  | <.001***          | 0.08                | 0.22                | 0.12    |
| TE        | ← Conservatism    | -0.09 | 0.05 | -1.82 | .068 <sup>†</sup> | -0.19               | 0.01                | -0.05   |

*Note.* Enter notes. \*\*\* =  $p < .001$ , \*\* =  $p < .01$ , \* =  $p < .05$ , <sup>†</sup> =  $p < .10$

Table 2

*Prediction of expectations of transformative experiences*

| Criterion | Predictor         | b     | SE   | z     | p                 | $CI_{lower}^{95\%}$ | $CI_{upper}^{95\%}$ | $\beta$ |
|-----------|-------------------|-------|------|-------|-------------------|---------------------|---------------------|---------|
| TE_Expect | ← Psychedelics    | 0.30  | 0.15 | 2.02  | .044*             | 0.01                | 0.59                | 0.07    |
| TE_Expect | ← Nicotine        | -0.03 | 0.13 | -0.25 | .803              | -0.28               | 0.22                | -0.01   |
| TE_Expect | ← Alcohol         | -0.25 | 0.15 | -1.71 | .086 <sup>†</sup> | -0.53               | 0.04                | -0.05   |
| TE_Expect | ← Stimulants      | 0.20  | 0.16 | 1.25  | .212              | -0.12               | 0.52                | 0.04    |
| TE_Expect | ← Euphorics       | 0.11  | 0.15 | 0.69  | .488              | -0.20               | 0.41                | 0.02    |
| TE_Expect | ← Cannabinoids    | 0.38  | 0.13 | 2.99  | .003**            | 0.13                | 0.62                | 0.10    |
| TE_Expect | ← Benzodiazepines | 0.06  | 0.33 | 0.20  | .844              | -0.58               | 0.71                | 0.01    |
| TE_Expect | ← Inhalants       | 0.04  | 0.24 | 0.15  | .882              | -0.44               | 0.51                | 0.00    |
| TE_Expect | ← Narcotics       | 0.28  | 0.41 | 0.68  | .493              | -0.52               | 1.07                | 0.02    |
| TE_Expect | ← Others          | -0.19 | 0.25 | -0.74 | .458              | -0.68               | 0.30                | -0.02   |
| TE_Expect | ← Gender_1        | -0.71 | 0.42 | -1.71 | .088 <sup>†</sup> | -1.53               | 0.10                | -0.19   |
| TE_Expect | ← Gender_2        | -0.73 | 0.42 | -1.77 | .077 <sup>†</sup> | -1.55               | 0.08                | -0.19   |
| TE_Expect | ← Education_1     | -0.21 | 0.26 | -0.83 | .405              | -0.71               | 0.29                | -0.03   |
| TE_Expect | ← Education_2     | -0.19 | 0.18 | -1.07 | .286              | -0.54               | 0.16                | -0.04   |
| TE_Expect | ← Education_3     | -0.36 | 0.20 | -1.85 | .064 <sup>†</sup> | -0.75               | 0.02                | -0.07   |
| TE_Expect | ← Education_4     | -0.26 | 0.16 | -1.67 | .095 <sup>†</sup> | -0.57               | 0.05                | -0.07   |
| TE_Expect | ← Age             | -0.02 | 0.01 | -2.97 | .003**            | -0.03               | -0.01               | -0.10   |
| TE_Expect | ← Religion        | 0.12  | 0.03 | 3.59  | <.001***          | 0.06                | 0.19                | 0.11    |
| TE_Expect | ← Conservatism    | -0.04 | 0.05 | -0.80 | .426              | -0.13               | 0.06                | -0.02   |

*Note.* Enter notes. \*\*\* =  $p < .001$ , \*\* =  $p < .01$ , \* =  $p < .05$ , <sup>†</sup> =  $p < .10$

Table 3

*Prediction of desire for transformative experiences*

| Criterion | Predictor         | b     | SE   | z     | p                 | $CI_{lower}^{95\%}$ | $CI_{upper}^{95\%}$ | $\beta$ |
|-----------|-------------------|-------|------|-------|-------------------|---------------------|---------------------|---------|
| TE_Desire | ← Psychedelics    | 0.30  | 0.16 | 1.91  | .056 <sup>†</sup> | -0.01               | 0.61                | 0.06    |
| TE_Desire | ← Nicotine        | -0.08 | 0.13 | -0.61 | .541              | -0.35               | 0.18                | -0.02   |
| TE_Desire | ← Alcohol         | -0.54 | 0.15 | -3.50 | <.001***          | -0.84               | -0.24               | -0.10   |
| TE_Desire | ← Stimulants      | 0.09  | 0.17 | 0.53  | .594              | -0.25               | 0.43                | 0.02    |
| TE_Desire | ← Euphorics       | 0.11  | 0.16 | 0.66  | .511              | -0.21               | 0.43                | 0.02    |
| TE_Desire | ← Cannabinoids    | 0.59  | 0.13 | 4.40  | <.001***          | 0.33                | 0.85                | 0.14    |
| TE_Desire | ← Benzodiazepines | 0.44  | 0.35 | 1.25  | .212              | -0.25               | 1.12                | 0.04    |
| TE_Desire | ← Inhalants       | 0.31  | 0.26 | 1.20  | .229              | -0.20               | 0.82                | 0.04    |
| TE_Desire | ← Narcotics       | -0.59 | 0.43 | -1.37 | .171              | -1.44               | 0.26                | -0.05   |
| TE_Desire | ← Others          | 0.08  | 0.27 | 0.29  | .769              | -0.44               | 0.60                | 0.01    |
| TE_Desire | ← Gender_1        | -0.32 | 0.45 | -0.70 | .483              | -1.21               | 0.57                | -0.08   |
| TE_Desire | ← Gender_2        | -0.34 | 0.45 | -0.76 | .449              | -1.23               | 0.55                | -0.08   |
| TE_Desire | ← Education_1     | -0.22 | 0.27 | -0.80 | .424              | -0.75               | 0.32                | -0.03   |
| TE_Desire | ← Education_2     | -0.42 | 0.19 | -2.18 | .029*             | -0.79               | -0.04               | -0.08   |
| TE_Desire | ← Education_3     | -0.47 | 0.21 | -2.25 | .025*             | -0.88               | -0.06               | -0.08   |
| TE_Desire | ← Education_4     | -0.35 | 0.17 | -2.12 | .034*             | -0.68               | -0.03               | -0.08   |
| TE_Desire | ← Age             | -0.03 | 0.01 | -4.36 | <.001***          | -0.04               | -0.01               | -0.14   |
| TE_Desire | ← Religion        | 0.15  | 0.04 | 4.16  | <.001***          | 0.08                | 0.22                | 0.12    |
| TE_Desire | ← Conservatism    | -0.12 | 0.05 | -2.32 | .020*             | -0.22               | -0.02               | -0.07   |

*Note.* Enter notes. \*\*\* =  $p < .001$ , \*\* =  $p < .01$ , \* =  $p < .05$ , <sup>†</sup> =  $p < .10$

Table 4

*Prediction of transformative experiences, controlling for expectations and desires*

| Criterion | Predictor         | b     | SE   | z     | p                 | $CI_{lower}^{95\%}$ | $CI_{upper}^{95\%}$ | $\beta$ |
|-----------|-------------------|-------|------|-------|-------------------|---------------------|---------------------|---------|
| TE        | ← TE_Desire       | 0.23  | 0.04 | 6.22  | <.001***          | 0.15                | 0.30                | 0.23    |
| TE        | ← TE_Expect       | 0.17  | 0.04 | 4.32  | <.001***          | 0.09                | 0.24                | 0.15    |
| TE        | ← Psychedelics    | 0.67  | 0.14 | 4.67  | <.001***          | 0.39                | 0.95                | 0.14    |
| TE        | ← Nicotine        | 0.23  | 0.12 | 1.85  | .065 <sup>†</sup> | -0.01               | 0.46                | 0.05    |
| TE        | ← Alcohol         | -0.53 | 0.14 | -3.72 | <.001***          | -0.80               | -0.25               | -0.10   |
| TE        | ← Stimulants      | 0.22  | 0.16 | 1.40  | .160              | -0.09               | 0.53                | 0.04    |
| TE        | ← Euphorics       | 0.18  | 0.15 | 1.21  | .227              | -0.11               | 0.48                | 0.04    |
| TE        | ← Cannabinoids    | 0.08  | 0.12 | 0.61  | .541              | -0.17               | 0.32                | 0.02    |
| TE        | ← Benzodiazepines | -0.04 | 0.32 | -0.12 | .905              | -0.67               | 0.59                | 0.00    |
| TE        | ← Inhalants       | -0.29 | 0.24 | -1.25 | .212              | -0.76               | 0.17                | -0.04   |
| TE        | ← Narcotics       | -0.10 | 0.40 | -0.24 | .808              | -0.87               | 0.68                | -0.01   |
| TE        | ← Others          | 0.29  | 0.24 | 1.18  | .240              | -0.19               | 0.76                | 0.03    |
| TE        | ← Gender_1        | 0.13  | 0.40 | 0.32  | .752              | -0.66               | 0.91                | 0.03    |
| TE        | ← Gender_2        | 0.24  | 0.40 | 0.60  | .549              | -0.55               | 1.03                | 0.06    |
| TE        | ← Education_1     | 0.23  | 0.25 | 0.94  | .346              | -0.25               | 0.72                | 0.03    |
| TE        | ← Education_2     | 0.49  | 0.17 | 2.86  | .004**            | 0.15                | 0.83                | 0.10    |
| TE        | ← Education_3     | -0.20 | 0.19 | -1.08 | .282              | -0.57               | 0.17                | -0.03   |
| TE        | ← Education_4     | 0.20  | 0.15 | 1.34  | .180              | -0.09               | 0.50                | 0.05    |
| TE        | ← Age             | 0.01  | 0.01 | 1.61  | .107              | 0.00                | 0.02                | 0.05    |
| TE        | ← Religion        | 0.10  | 0.03 | 2.88  | .004**            | 0.03                | 0.16                | 0.08    |
| TE        | ← Conservatism    | -0.06 | 0.05 | -1.31 | .191              | -0.15               | 0.03                | -0.04   |

*Note.* Enter notes. \*\*\* =  $p < .001$ , \*\* =  $p < .01$ , \* =  $p < .05$ , <sup>†</sup> =  $p < .10$

Table 5

*Prediction of epistemically transformative experiences*

| Criterion |   | Predictor       | b     | SE   | z     | p        | $CI_{lower}^{95\%}$ | $CI_{upper}^{95\%}$ | $\beta$ |
|-----------|---|-----------------|-------|------|-------|----------|---------------------|---------------------|---------|
| ETE       | ← | Psychedelics    | 0.46  | 0.15 | 3.14  | .002**   | 0.17                | 0.75                | 0.10    |
| ETE       | ← | Nicotine        | 0.10  | 0.13 | 0.82  | .411     | -0.14               | 0.35                | 0.03    |
| ETE       | ← | Alcohol         | -0.84 | 0.15 | -5.75 | <.001*** | -1.13               | -0.56               | -0.17   |
| ETE       | ← | Stimulants      | 0.40  | 0.16 | 2.48  | .013*    | 0.08                | 0.71                | 0.08    |
| ETE       | ← | Euphorics       | 0.14  | 0.15 | 0.91  | .364     | -0.16               | 0.44                | 0.03    |
| ETE       | ← | Cannabinoids    | 0.25  | 0.13 | 2.02  | .044*    | 0.01                | 0.50                | 0.06    |
| ETE       | ← | Benzodiazepines | -0.18 | 0.33 | -0.53 | .593     | -0.83               | 0.47                | -0.02   |
| ETE       | ← | Inhalants       | -0.33 | 0.24 | -1.35 | .176     | -0.80               | 0.15                | -0.04   |
| ETE       | ← | Narcotics       | 0.08  | 0.40 | 0.19  | .847     | -0.71               | 0.87                | 0.01    |
| ETE       | ← | Others          | 0.66  | 0.25 | 2.61  | .009**   | 0.16                | 1.15                | 0.08    |
| ETE       | ← | Gender_1        | 0.05  | 0.41 | 0.11  | .912     | -0.76               | 0.86                | 0.01    |
| ETE       | ← | Gender_2        | -0.01 | 0.41 | -0.02 | .987     | -0.82               | 0.80                | 0.00    |
| ETE       | ← | Education_1     | 0.51  | 0.26 | 1.98  | .048*    | 0.00                | 1.02                | 0.06    |
| ETE       | ← | Education_2     | 0.26  | 0.18 | 1.45  | .146     | -0.09               | 0.61                | 0.06    |
| ETE       | ← | Education_3     | -0.08 | 0.19 | -0.39 | .694     | -0.45               | 0.30                | -0.01   |
| ETE       | ← | Education_4     | 0.09  | 0.16 | 0.60  | .551     | -0.21               | 0.40                | 0.02    |
| ETE       | ← | Age             | 0.00  | 0.01 | -0.11 | .915     | -0.01               | 0.01                | 0.00    |
| ETE       | ← | Religion        | 0.14  | 0.03 | 4.14  | <.001*** | 0.07                | 0.21                | 0.12    |
| ETE       | ← | Conservatism    | -0.11 | 0.05 | -2.37 | .018*    | -0.21               | -0.02               | -0.07   |

*Note.* Enter notes. \*\*\* =  $p < .001$ , \*\* =  $p < .01$ , \* =  $p < .05$ , † =  $p < .10$

Table 6

*Prediction of epistemically transformative experiences, controlling for expectations and desires*

| Criterion | Predictor         | b     | SE   | z     | p                 | $CI_{lower}^{95\%}$ | $CI_{upper}^{95\%}$ | $\beta$ |
|-----------|-------------------|-------|------|-------|-------------------|---------------------|---------------------|---------|
| ETE       | ← TE_Desire       | 0.17  | 0.04 | 4.94  | <.001***          | 0.10                | 0.24                | 0.18    |
| ETE       | ← TE_Expect       | 0.11  | 0.04 | 2.80  | .005**            | 0.03                | 0.18                | 0.10    |
| ETE       | ← Psychedelics    | 0.38  | 0.14 | 2.66  | .008**            | 0.10                | 0.66                | 0.09    |
| ETE       | ← Nicotine        | 0.12  | 0.12 | 0.98  | .325              | -0.12               | 0.36                | 0.03    |
| ETE       | ← Alcohol         | -0.73 | 0.14 | -5.15 | <.001***          | -1.01               | -0.45               | -0.15   |
| ETE       | ← Stimulants      | 0.37  | 0.16 | 2.35  | .019*             | 0.06                | 0.67                | 0.08    |
| ETE       | ← Euphorics       | 0.11  | 0.15 | 0.72  | .472              | -0.19               | 0.40                | 0.02    |
| ETE       | ← Cannabinoids    | 0.11  | 0.12 | 0.89  | .371              | -0.13               | 0.35                | 0.03    |
| ETE       | ← Benzodiazepines | -0.27 | 0.32 | -0.83 | .404              | -0.89               | 0.36                | -0.03   |
| ETE       | ← Inhalants       | -0.37 | 0.23 | -1.60 | .111              | -0.83               | 0.09                | -0.05   |
| ETE       | ← Narcotics       | 0.15  | 0.39 | 0.39  | .699              | -0.61               | 0.92                | 0.01    |
| ETE       | ← Others          | 0.66  | 0.24 | 2.71  | .007**            | 0.18                | 1.14                | 0.08    |
| ETE       | ← Gender_1        | 0.17  | 0.40 | 0.44  | .662              | -0.61               | 0.96                | 0.04    |
| ETE       | ← Gender_2        | 0.12  | 0.40 | 0.30  | .763              | -0.66               | 0.90                | 0.03    |
| ETE       | ← Education_1     | 0.57  | 0.25 | 2.26  | .024*             | 0.08                | 1.06                | 0.07    |
| ETE       | ← Education_2     | 0.35  | 0.17 | 2.02  | .044*             | 0.01                | 0.69                | 0.07    |
| ETE       | ← Education_3     | 0.04  | 0.19 | 0.24  | .811              | -0.32               | 0.41                | 0.01    |
| ETE       | ← Education_4     | 0.18  | 0.15 | 1.22  | .221              | -0.11               | 0.48                | 0.05    |
| ETE       | ← Age             | 0.01  | 0.01 | 1.08  | .280              | 0.00                | 0.02                | 0.03    |
| ETE       | ← Religion        | 0.10  | 0.03 | 3.11  | .002**            | 0.04                | 0.17                | 0.09    |
| ETE       | ← Conservatism    | -0.09 | 0.05 | -1.90 | .057 <sup>†</sup> | -0.18               | 0.00                | -0.05   |

*Note.* Enter notes. \*\*\* =  $p < .001$ , \*\* =  $p < .01$ , \* =  $p < .05$ , <sup>†</sup> =  $p < .10$

Table 7

*Prediction of social connectedness*

| Criterion   | Predictor         | b     | SE   | z     | p      | $CI_{lower}^{95\%}$ | $CI_{upper}^{95\%}$ | $\beta$ |
|-------------|-------------------|-------|------|-------|--------|---------------------|---------------------|---------|
| Social Con. | ← Psychedelics    | 0.36  | 0.12 | 2.91  | .004** | 0.12                | 0.60                | 0.10    |
| Social Con. | ← Nicotine        | 0.11  | 0.10 | 1.03  | .305   | -0.10               | 0.31                | 0.03    |
| Social Con. | ← Alcohol         | -0.19 | 0.12 | -1.63 | .104   | -0.43               | 0.04                | -0.05   |
| Social Con. | ← Stimulants      | -0.06 | 0.13 | -0.45 | .654   | -0.32               | 0.20                | -0.02   |
| Social Con. | ← Euphorics       | 0.10  | 0.13 | 0.80  | .423   | -0.15               | 0.35                | 0.03    |
| Social Con. | ← Cannabinoids    | 0.17  | 0.10 | 1.63  | .103   | -0.03               | 0.37                | 0.05    |
| Social Con. | ← Benzodiazepines | -0.16 | 0.27 | -0.58 | .563   | -0.70               | 0.38                | -0.02   |
| Social Con. | ← Inhalants       | -0.08 | 0.20 | -0.41 | .680   | -0.48               | 0.31                | -0.01   |
| Social Con. | ← Narcotics       | 0.33  | 0.34 | 0.97  | .331   | -0.33               | 0.98                | 0.03    |
| Social Con. | ← Others          | -0.06 | 0.21 | -0.27 | .784   | -0.46               | 0.35                | -0.01   |
| Social Con. | ← Gender_1        | -0.32 | 0.36 | -0.89 | .371   | -1.02               | 0.38                | -0.10   |
| Social Con. | ← Gender_2        | -0.03 | 0.36 | -0.08 | .934   | -0.73               | 0.67                | -0.01   |
| Social Con. | ← Education_1     | -0.06 | 0.21 | -0.26 | .792   | -0.47               | 0.36                | -0.01   |
| Social Con. | ← Education_2     | -0.08 | 0.15 | -0.54 | .587   | -0.37               | 0.21                | -0.02   |
| Social Con. | ← Education_3     | 0.04  | 0.16 | 0.25  | .804   | -0.27               | 0.35                | 0.01    |
| Social Con. | ← Education_4     | -0.16 | 0.13 | -1.28 | .202   | -0.41               | 0.09                | -0.05   |
| Social Con. | ← Age             | 0.01  | 0.00 | 2.19  | .029*  | 0.00                | 0.02                | 0.07    |
| Social Con. | ← Religion        | 0.08  | 0.03 | 2.76  | .006** | 0.02                | 0.13                | 0.08    |
| Social Con. | ← Conservatism    | 0.03  | 0.04 | 0.67  | .501   | -0.05               | 0.10                | 0.02    |

*Note.* Enter notes. \*\*\* =  $p < .001$ , \*\* =  $p < .01$ , \* =  $p < .05$ , † =  $p < .10$

Table 8

*Prediction of mood*

| Criterion | Predictor         | b     | SE   | z     | p                 | $CI_{lower}^{95\%}$ | $CI_{upper}^{95\%}$ | $\beta$ |
|-----------|-------------------|-------|------|-------|-------------------|---------------------|---------------------|---------|
| Mood      | ← Psychedelics    | 0.14  | 0.06 | 2.36  | .019*             | 0.02                | 0.26                | 0.08    |
| Mood      | ← Nicotine        | 0.06  | 0.05 | 1.18  | .236              | -0.04               | 0.16                | 0.04    |
| Mood      | ← Alcohol         | -0.15 | 0.06 | -2.56 | .011*             | -0.27               | -0.04               | -0.08   |
| Mood      | ← Stimulants      | 0.10  | 0.07 | 1.57  | .116              | -0.03               | 0.23                | 0.05    |
| Mood      | ← Euphorics       | -0.02 | 0.06 | -0.28 | .783              | -0.14               | 0.11                | -0.01   |
| Mood      | ← Cannabinoids    | 0.07  | 0.05 | 1.32  | .185              | -0.03               | 0.17                | 0.04    |
| Mood      | ← Benzodiazepines | -0.15 | 0.14 | -1.08 | .278              | -0.42               | 0.12                | -0.04   |
| Mood      | ← Inhalants       | 0.01  | 0.10 | 0.12  | .908              | -0.18               | 0.21                | 0.00    |
| Mood      | ← Narcotics       | -0.13 | 0.17 | -0.76 | .447              | -0.46               | 0.20                | -0.03   |
| Mood      | ← Others          | -0.12 | 0.10 | -1.11 | .267              | -0.32               | 0.09                | -0.03   |
| Mood      | ← Gender_1        | 0.18  | 0.18 | 1.02  | .306              | -0.17               | 0.53                | 0.12    |
| Mood      | ← Gender_2        | 0.25  | 0.18 | 1.37  | .170              | -0.11               | 0.60                | 0.16    |
| Mood      | ← Education_1     | 0.03  | 0.11 | 0.28  | .779              | -0.18               | 0.24                | 0.01    |
| Mood      | ← Education_2     | -0.12 | 0.07 | -1.69 | .092 <sup>†</sup> | -0.27               | 0.02                | -0.07   |
| Mood      | ← Education_3     | -0.14 | 0.08 | -1.72 | .086 <sup>†</sup> | -0.29               | 0.02                | -0.06   |
| Mood      | ← Education_4     | -0.12 | 0.06 | -1.88 | .060 <sup>†</sup> | -0.25               | 0.01                | -0.07   |
| Mood      | ← Age             | 0.01  | 0.00 | 2.40  | .016*             | 0.00                | 0.01                | 0.08    |
| Mood      | ← Religion        | 0.01  | 0.01 | 0.59  | .558              | -0.02               | 0.04                | 0.02    |
| Mood      | ← Conservatism    | -0.01 | 0.02 | -0.71 | .475              | -0.05               | 0.02                | -0.02   |

*Note.* Enter notes. \*\*\* =  $p < .001$ , \*\* =  $p < .01$ , \* =  $p < .05$ , <sup>†</sup> =  $p < .10$

**Mediation analyses**

The following tables display results of the mediation analyses reported in the main document. Tables include all predictors assessed, including use of the various substance classes over the entire past week (incl. the last 24 hours), as well the control variables specified in the pre-registration (some of which were dummy-coded).

Table 9

*Prediction of mood via self-reported transformative experiences*

| Criterion |   | Predictor       | b     | SE   | z     | p        | $CI_{lower}^{95\%}$ | $CI_{upper}^{95\%}$ | $\beta$ |
|-----------|---|-----------------|-------|------|-------|----------|---------------------|---------------------|---------|
| TE        | ← | TE_Desire       | 0.23  | 0.04 | 6.23  | <.001*** | 0.15                | 0.30                | 0.23    |
| TE        | ← | TE_Expect       | 0.17  | 0.04 | 4.30  | <.001*** | 0.09                | 0.24                | 0.15    |
| TE        | ← | Psychedelics    | 0.67  | 0.14 | 4.66  | <.001*** | 0.39                | 0.95                | 0.14    |
| TE        | ← | Nicotine        | 0.22  | 0.12 | 1.83  | .067†    | -0.02               | 0.46                | 0.05    |
| TE        | ← | Alcohol         | -0.52 | 0.14 | -3.71 | <.001*** | -0.80               | -0.25               | -0.10   |
| TE        | ← | Stimulants      | 0.22  | 0.16 | 1.40  | .160     | -0.09               | 0.53                | 0.04    |
| TE        | ← | Euphorics       | 0.18  | 0.15 | 1.23  | .219     | -0.11               | 0.48                | 0.04    |
| TE        | ← | Cannabinoids    | 0.07  | 0.12 | 0.60  | .549     | -0.17               | 0.31                | 0.02    |
| TE        | ← | Benzodiazepines | -0.04 | 0.32 | -0.11 | .909     | -0.67               | 0.60                | 0.00    |
| TE        | ← | Inhalants       | -0.30 | 0.24 | -1.26 | .209     | -0.76               | 0.17                | -0.04   |
| TE        | ← | Narcotics       | -0.10 | 0.40 | -0.24 | .808     | -0.87               | 0.68                | -0.01   |
| TE        | ← | Others          | 0.29  | 0.24 | 1.17  | .242     | -0.19               | 0.76                | 0.03    |
| TE        | ← | Gender_1        | 0.12  | 0.40 | 0.31  | .756     | -0.66               | 0.91                | 0.03    |
| TE        | ← | Gender_2        | 0.24  | 0.40 | 0.60  | .551     | -0.55               | 1.03                | 0.06    |
| TE        | ← | Education_1     | 0.23  | 0.25 | 0.94  | .345     | -0.25               | 0.72                | 0.03    |
| TE        | ← | Education_2     | 0.49  | 0.17 | 2.82  | .005**   | 0.15                | 0.82                | 0.10    |
| TE        | ← | Education_3     | -0.21 | 0.19 | -1.11 | .269     | -0.57               | 0.16                | -0.03   |
| TE        | ← | Education_4     | 0.20  | 0.15 | 1.30  | .195     | -0.10               | 0.49                | 0.05    |
| TE        | ← | Age             | 0.01  | 0.01 | 1.59  | .112     | 0.00                | 0.02                | 0.05    |
| TE        | ← | Religion        | 0.10  | 0.03 | 2.88  | .004**   | 0.03                | 0.16                | 0.08    |
| TE        | ← | Conservatism    | -0.06 | 0.05 | -1.31 | .192     | -0.15               | 0.03                | -0.04   |
| Mood      | ← | TE              | 0.08  | 0.01 | 7.07  | <.001*** | 0.06                | 0.10                | 0.21    |
| Mood      | ← | Psychedelics    | 0.08  | 0.06 | 1.34  | .181     | -0.04               | 0.20                | 0.05    |

|          |    |                 |       |      |       |        |       |       |       |
|----------|----|-----------------|-------|------|-------|--------|-------|-------|-------|
| Mood     | ←  | Nicotine        | 0.04  | 0.05 | 0.88  | .378   | -0.06 | 0.15  | 0.03  |
| Mood     | ←  | Alcohol         | -0.10 | 0.06 | -1.64 | .101   | -0.21 | 0.02  | -0.05 |
| Mood     | ←  | Stimulants      | 0.08  | 0.07 | 1.27  | .204   | -0.05 | 0.21  | 0.04  |
| Mood     | ←  | Euphorics       | -0.04 | 0.06 | -0.59 | .558   | -0.16 | 0.09  | -0.02 |
| Mood     | ←  | Cannabinoids    | 0.05  | 0.05 | 0.92  | .359   | -0.05 | 0.15  | 0.03  |
| Mood     | ←  | Benzodiazepines | -0.16 | 0.13 | -1.15 | .250   | -0.42 | 0.11  | -0.04 |
| Mood     | ←  | Inhalants       | 0.03  | 0.10 | 0.32  | .747   | -0.16 | 0.22  | 0.01  |
| Mood     | ←  | Narcotics       | -0.11 | 0.16 | -0.65 | .513   | -0.43 | 0.22  | -0.02 |
| Mood     | ←  | Others          | -0.14 | 0.10 | -1.37 | .170   | -0.34 | 0.06  | -0.04 |
| Mood     | ←  | Gender_1        | 0.17  | 0.18 | 0.99  | .324   | -0.17 | 0.52  | 0.11  |
| Mood     | ←  | Gender_2        | 0.23  | 0.18 | 1.30  | .195   | -0.12 | 0.57  | 0.14  |
| Mood     | ←  | Education_1     | 0.01  | 0.10 | 0.12  | .902   | -0.19 | 0.22  | 0.00  |
| Mood     | ←  | Education_2     | -0.15 | 0.07 | -2.14 | .033*  | -0.29 | -0.01 | -0.08 |
| Mood     | ←  | Education_3     | -0.11 | 0.08 | -1.40 | .162   | -0.26 | 0.04  | -0.05 |
| Mood     | ←  | Education_4     | -0.13 | 0.06 | -2.02 | .043*  | -0.25 | 0.00  | -0.08 |
| Mood     | ←  | Age             | 0.01  | 0.00 | 2.50  | .012*  | 0.00  | 0.01  | 0.08  |
| Mood     | ←  | Religion        | 0.00  | 0.01 | -0.21 | .834   | -0.03 | 0.02  | -0.01 |
| Mood     | ←  | Conservatism    | -0.01 | 0.02 | -0.34 | .730   | -0.04 | 0.03  | -0.01 |
| Direct   | on | Mood            | -0.10 | 0.06 | -1.64 | .101   | -0.21 | 0.02  | -0.05 |
| Indirect | on | Mood            | -0.04 | 0.01 | -3.29 | .001** | -0.07 | -0.02 | -0.02 |
| Total    | on | Mood            | -0.14 | 0.06 | -2.32 | .020*  | -0.26 | -0.02 | -0.07 |

*Note.* Indirect, direct, and total effects represent effects of psychedelic substance use on mood via self-reported transformative experiences. \*\*\* =  $p < .001$ , \*\* =  $p < .01$ , \* =  $p < .05$ , † =  $p < .10$

Table 10

*Prediction of mood via social connectedness*

| Criterion   | Predictor         | b     | SE   | z     | p        | $CI_{lower}^{95\%}$ | $CI_{upper}^{95\%}$ | $\beta$ |
|-------------|-------------------|-------|------|-------|----------|---------------------|---------------------|---------|
| Social Con. | ← Psychedelics    | 0.35  | 0.12 | 2.87  | .004**   | 0.11                | 0.59                | 0.10    |
| Social Con. | ← Nicotine        | 0.11  | 0.10 | 1.02  | .308     | -0.10               | 0.31                | 0.03    |
| Social Con. | ← Alcohol         | -0.20 | 0.12 | -1.65 | .100†    | -0.43               | 0.04                | -0.05   |
| Social Con. | ← Stimulants      | -0.06 | 0.13 | -0.42 | .675     | -0.32               | 0.21                | -0.01   |
| Social Con. | ← Euphorics       | 0.11  | 0.13 | 0.82  | .411     | -0.15               | 0.36                | 0.03    |
| Social Con. | ← Cannabinoids    | 0.17  | 0.10 | 1.66  | .097†    | -0.03               | 0.38                | 0.06    |
| Social Con. | ← Benzodiazepines | -0.16 | 0.27 | -0.57 | .568     | -0.69               | 0.38                | -0.02   |
| Social Con. | ← Inhalants       | -0.09 | 0.20 | -0.46 | .648     | -0.49               | 0.30                | -0.02   |
| Social Con. | ← Narcotics       | 0.33  | 0.34 | 0.98  | .328     | -0.33               | 0.99                | 0.03    |
| Social Con. | ← Others          | -0.06 | 0.21 | -0.28 | .780     | -0.46               | 0.35                | -0.01   |
| Social Con. | ← Gender_1        | -0.34 | 0.36 | -0.95 | .342     | -1.03               | 0.36                | -0.11   |
| Social Con. | ← Gender_2        | -0.05 | 0.36 | -0.14 | .886     | -0.75               | 0.65                | -0.02   |
| Social Con. | ← Education_1     | -0.05 | 0.21 | -0.24 | .812     | -0.47               | 0.37                | -0.01   |
| Social Con. | ← Education_2     | -0.08 | 0.15 | -0.55 | .580     | -0.37               | 0.21                | -0.02   |
| Social Con. | ← Education_3     | 0.04  | 0.16 | 0.25  | .806     | -0.27               | 0.35                | 0.01    |
| Social Con. | ← Education_4     | -0.16 | 0.13 | -1.27 | .205     | -0.41               | 0.09                | -0.05   |
| Social Con. | ← Age             | 0.01  | 0.00 | 2.20  | .028*    | 0.00                | 0.02                | 0.07    |
| Social Con. | ← Religion        | 0.08  | 0.03 | 2.78  | .005**   | 0.02                | 0.13                | 0.08    |
| Social Con. | ← Conservatism    | 0.03  | 0.04 | 0.68  | .494     | -0.05               | 0.10                | 0.02    |
| Mood        | ← Social Con.     | 0.11  | 0.01 | 8.03  | <.001*** | 0.09                | 0.14                | 0.23    |
| Mood        | ← Psychedelics    | 0.10  | 0.06 | 1.70  | .089†    | -0.02               | 0.22                | 0.06    |
| Mood        | ← Nicotine        | 0.05  | 0.05 | 1.01  | .311     | -0.05               | 0.15                | 0.03    |
| Mood        | ← Alcohol         | -0.13 | 0.06 | -2.28 | .022*    | -0.25               | -0.02               | -0.07   |

|          |    |                 |       |      |       |                    |       |      |       |
|----------|----|-----------------|-------|------|-------|--------------------|-------|------|-------|
| Mood     | ←  | Stimulants      | 0.11  | 0.06 | 1.71  | .087 <sup>†</sup>  | -0.02 | 0.24 | 0.06  |
| Mood     | ←  | Euphorics       | -0.03 | 0.06 | -0.46 | .645               | -0.15 | 0.09 | -0.02 |
| Mood     | ←  | Cannabinoids    | 0.05  | 0.05 | 1.01  | .314               | -0.05 | 0.15 | 0.03  |
| Mood     | ←  | Benzodiazepines | -0.13 | 0.13 | -0.97 | .334               | -0.39 | 0.13 | -0.03 |
| Mood     | ←  | Inhalants       | 0.02  | 0.10 | 0.25  | .806               | -0.17 | 0.22 | 0.01  |
| Mood     | ←  | Narcotics       | -0.16 | 0.16 | -0.98 | .329               | -0.48 | 0.16 | -0.03 |
| Mood     | ←  | Others          | -0.11 | 0.10 | -1.11 | .266               | -0.31 | 0.09 | -0.03 |
| Mood     | ←  | Gender_1        | 0.21  | 0.17 | 1.19  | .236               | -0.14 | 0.55 | 0.13  |
| Mood     | ←  | Gender_2        | 0.24  | 0.17 | 1.36  | .175               | -0.11 | 0.58 | 0.15  |
| Mood     | ←  | Education_1     | 0.03  | 0.10 | 0.33  | .744               | -0.17 | 0.24 | 0.01  |
| Mood     | ←  | Education_2     | -0.12 | 0.07 | -1.64 | .100               | -0.26 | 0.02 | -0.06 |
| Mood     | ←  | Education_3     | -0.14 | 0.08 | -1.83 | .067 <sup>†</sup>  | -0.29 | 0.01 | -0.06 |
| Mood     | ←  | Education_4     | -0.10 | 0.06 | -1.65 | .098 <sup>†</sup>  | -0.23 | 0.02 | -0.06 |
| Mood     | ←  | Age             | 0.00  | 0.00 | 1.92  | .054 <sup>†</sup>  | 0.00  | 0.01 | 0.06  |
| Mood     | ←  | Religion        | 0.00  | 0.01 | -0.09 | .928               | -0.03 | 0.03 | 0.00  |
| Mood     | ←  | Conservatism    | -0.02 | 0.02 | -0.86 | .388               | -0.05 | 0.02 | -0.03 |
| Indirect | on | Mood            | 0.04  | 0.01 | 2.71  | .007 <sup>**</sup> | 0.01  | 0.07 | 0.02  |
| Direct   | on | Mood            | 0.10  | 0.06 | 1.70  | .089 <sup>†</sup>  | -0.02 | 0.22 | 0.06  |
| Total    | on | Mood            | 0.14  | 0.06 | 2.32  | .021 <sup>*</sup>  | 0.02  | 0.26 | 0.08  |

*Note.* Indirect, direct, and total effects represent effects of psychedelic substance use on mood via social connectedness. \*\*\* =  $p < .001$ , \*\* =  $p < .01$ , \* =  $p < .05$ , † =  $p < .10$

**24h vs. week prior use of psychedelics**

The following tables show results differentiating between very recent (`_24`) and moderately recent (`_week`) use of psychedelic substances. As before, also included are variables indicating recent use of the other substance classes (not differentiating between the last week and the last 24 hours; see analyses above), as well the co-variates specified in the pre-registration.

Table 11

*Prediction of transformative experiences (24h vs. last week)*

| Criterion        | Predictor             | b     | SE   | z     | p                 | $CI_{lower}^{95\%}$ | $CI_{upper}^{95\%}$ | $\beta$ |
|------------------|-----------------------|-------|------|-------|-------------------|---------------------|---------------------|---------|
| TE               | ← Psychedelics (24h)  | 0.90  | 0.16 | 5.50  | <.001***          | 0.58                | 1.22                | 0.17    |
| TE               | ← Psychedelics (week) | 0.32  | 0.22 | 1.44  | .149              | -0.11               | 0.76                | 0.04    |
| TE               | ← Nicotine            | 0.22  | 0.13 | 1.66  | .097 <sup>†</sup> | -0.04               | 0.47                | 0.05    |
| TE               | ← Alcohol             | -0.69 | 0.15 | -4.61 | <.001***          | -0.98               | -0.40               | -0.13   |
| TE               | ← Stimulants          | 0.27  | 0.17 | 1.62  | .105              | -0.06               | 0.60                | 0.05    |
| TE               | ← Euphorics           | 0.27  | 0.16 | 1.66  | .097 <sup>†</sup> | -0.05               | 0.58                | 0.06    |
| TE               | ← Cannabinoids        | 0.26  | 0.13 | 2.01  | .044*             | 0.01                | 0.52                | 0.06    |
| TE               | ← Benzodiazepines     | 0.06  | 0.34 | 0.17  | .866              | -0.62               | 0.73                | 0.01    |
| TE               | ← Inhalants           | -0.21 | 0.25 | -0.85 | .395              | -0.71               | 0.28                | -0.03   |
| TE               | ← Narcotics           | -0.17 | 0.42 | -0.40 | .686              | -1.00               | 0.66                | -0.01   |
| TE               | ← Others              | 0.31  | 0.26 | 1.19  | .234              | -0.20               | 0.82                | 0.03    |
| TE               | ← Gender_1            | -0.09 | 0.43 | -0.21 | .832              | -0.93               | 0.75                | -0.02   |
| TE               | ← Gender_2            | 0.01  | 0.43 | 0.02  | .983              | -0.83               | 0.84                | 0.00    |
| TE               | ← Education_1         | 0.08  | 0.27 | 0.31  | .759              | -0.44               | 0.60                | 0.01    |
| TE               | ← Education_2         | 0.34  | 0.18 | 1.87  | .062 <sup>†</sup> | -0.02               | 0.70                | 0.07    |
| TE               | ← Education_3         | -0.41 | 0.20 | -2.05 | .040*             | -0.80               | -0.02               | -0.07   |
| TE               | ← Education_4         | 0.04  | 0.16 | 0.27  | .788              | -0.27               | 0.36                | 0.01    |
| TE               | ← Age                 | 0.00  | 0.01 | -0.03 | .972              | -0.01               | 0.01                | 0.00    |
| TE               | ← Religion            | 0.15  | 0.04 | 4.18  | <.001***          | 0.08                | 0.22                | 0.12    |
| TE               | ← Conservatism        | -0.09 | 0.05 | -1.82 | .068 <sup>†</sup> | -0.19               | 0.01                | -0.05   |
| $\Delta 24/week$ |                       | 0.58  | 0.24 | 2.39  | .017*             | 0.10                | 1.06                | 0.13    |

Note. Enter notes. \*\*\* =  $p < .001$ , \*\* =  $p < .01$ , \* =  $p < .05$ , <sup>†</sup> =  $p < .10$

Table 12

*Prediction of expectations of transformative experiences (24h vs. last week)*

| Criterion | Predictor             | b     | SE   | z     | p                 | $CI_{lower}^{95\%}$ | $CI_{upper}^{95\%}$ | $\beta$ |
|-----------|-----------------------|-------|------|-------|-------------------|---------------------|---------------------|---------|
| TE_Expect | ← Psychedelics (24h)  | 0.37  | 0.16 | 2.33  | .020*             | 0.06                | 0.68                | 0.08    |
| TE_Expect | ← Psychedelics (week) | 0.02  | 0.21 | 0.09  | .925              | -0.40               | 0.44                | 0.00    |
| TE_Expect | ← Nicotine            | -0.03 | 0.13 | -0.23 | .819              | -0.28               | 0.22                | -0.01   |
| TE_Expect | ← Alcohol             | -0.24 | 0.15 | -1.68 | .093 <sup>†</sup> | -0.53               | 0.04                | -0.05   |
| TE_Expect | ← Stimulants          | 0.21  | 0.16 | 1.27  | .205              | -0.11               | 0.52                | 0.04    |
| TE_Expect | ← Euphorics           | 0.13  | 0.15 | 0.81  | .417              | -0.18               | 0.43                | 0.03    |
| TE_Expect | ← Cannabinoids        | 0.37  | 0.13 | 2.95  | .003**            | 0.13                | 0.62                | 0.10    |
| TE_Expect | ← Benzodiazepines     | 0.05  | 0.33 | 0.15  | .882              | -0.60               | 0.69                | 0.01    |
| TE_Expect | ← Inhalants           | 0.05  | 0.24 | 0.19  | .852              | -0.43               | 0.52                | 0.01    |
| TE_Expect | ← Narcotics           | 0.30  | 0.41 | 0.74  | .458              | -0.49               | 1.09                | 0.03    |
| TE_Expect | ← Others              | -0.16 | 0.25 | -0.64 | .519              | -0.65               | 0.33                | -0.02   |
| TE_Expect | ← Gender_1            | -0.74 | 0.42 | -1.77 | .077 <sup>†</sup> | -1.55               | 0.08                | -0.19   |
| TE_Expect | ← Gender_2            | -0.76 | 0.42 | -1.83 | .067 <sup>†</sup> | -1.58               | 0.05                | -0.20   |
| TE_Expect | ← Education_1         | -0.25 | 0.26 | -0.99 | .324              | -0.76               | 0.25                | -0.03   |
| TE_Expect | ← Education_2         | -0.21 | 0.18 | -1.15 | .249              | -0.55               | 0.14                | -0.05   |
| TE_Expect | ← Education_3         | -0.38 | 0.20 | -1.96 | .051 <sup>†</sup> | -0.77               | 0.00                | -0.07   |
| TE_Expect | ← Education_4         | -0.28 | 0.16 | -1.76 | .078 <sup>†</sup> | -0.58               | 0.03                | -0.07   |
| TE_Expect | ← Age                 | -0.02 | 0.01 | -2.90 | .004**            | -0.03               | -0.01               | -0.09   |
| TE_Expect | ← Religion            | 0.12  | 0.03 | 3.54  | <.001***          | 0.05                | 0.19                | 0.10    |
| TE_Expect | ← Conservatism        | -0.04 | 0.05 | -0.79 | .431              | -0.13               | 0.06                | -0.02   |
|           | $\Delta 24/week$      | 0.35  | 0.23 | 1.49  | .137              | -0.11               | 0.81                | 0.07    |

Note. Enter notes. \*\*\* =  $p < .001$ , \*\* =  $p < .01$ , \* =  $p < .05$ , <sup>†</sup> =  $p < .10$

Table 13

*Prediction of desire for transformative experiences (24h vs. last week)*

| Criterion | Predictor             | b     | SE   | z     | p        | $CI_{lower}^{95\%}$ | $CI_{upper}^{95\%}$ | $\beta$ |
|-----------|-----------------------|-------|------|-------|----------|---------------------|---------------------|---------|
| TE_Desire | ← Psychedelics (24h)  | 0.33  | 0.17 | 1.98  | .048*    | 0.00                | 0.66                | 0.06    |
| TE_Desire | ← Psychedelics (week) | 0.15  | 0.23 | 0.68  | .498     | -0.29               | 0.60                | 0.02    |
| TE_Desire | ← Nicotine            | -0.08 | 0.13 | -0.59 | .554     | -0.34               | 0.18                | -0.02   |
| TE_Desire | ← Alcohol             | -0.54 | 0.15 | -3.48 | <.001*** | -0.84               | -0.24               | -0.10   |
| TE_Desire | ← Stimulants          | 0.09  | 0.17 | 0.55  | .585     | -0.24               | 0.43                | 0.02    |
| TE_Desire | ← Euphorics           | 0.12  | 0.16 | 0.71  | .477     | -0.21               | 0.44                | 0.02    |
| TE_Desire | ← Cannabinoids        | 0.59  | 0.13 | 4.36  | <.001*** | 0.32                | 0.85                | 0.14    |
| TE_Desire | ← Benzodiazepines     | 0.43  | 0.35 | 1.23  | .219     | -0.26               | 1.12                | 0.04    |
| TE_Desire | ← Inhalants           | 0.32  | 0.26 | 1.22  | .221     | -0.19               | 0.83                | 0.04    |
| TE_Desire | ← Narcotics           | -0.58 | 0.43 | -1.34 | .181     | -1.42               | 0.27                | -0.05   |
| TE_Desire | ← Others              | 0.09  | 0.27 | 0.33  | .738     | -0.43               | 0.61                | 0.01    |
| TE_Desire | ← Gender_1            | -0.33 | 0.45 | -0.74 | .462     | -1.23               | 0.56                | -0.08   |
| TE_Desire | ← Gender_2            | -0.36 | 0.45 | -0.79 | .427     | -1.25               | 0.53                | -0.09   |
| TE_Desire | ← Education_1         | -0.24 | 0.27 | -0.88 | .382     | -0.78               | 0.30                | -0.03   |
| TE_Desire | ← Education_2         | -0.42 | 0.19 | -2.22 | .027*    | -0.80               | -0.05               | -0.09   |
| TE_Desire | ← Education_3         | -0.48 | 0.21 | -2.29 | .022*    | -0.89               | -0.07               | -0.08   |
| TE_Desire | ← Education_4         | -0.36 | 0.17 | -2.15 | .031*    | -0.69               | -0.03               | -0.08   |
| TE_Desire | ← Age                 | -0.02 | 0.01 | -4.32 | <.001*** | -0.04               | -0.01               | -0.14   |
| TE_Desire | ← Religion            | 0.15  | 0.04 | 4.13  | <.001*** | 0.08                | 0.22                | 0.12    |
| TE_Desire | ← Conservatism        | -0.12 | 0.05 | -2.32 | .020*    | -0.22               | -0.02               | -0.07   |
|           | $\Delta 24/week$      | 0.18  | 0.25 | 0.72  | .475     | -0.31               | 0.67                | 0.04    |

Note. Enter notes. \*\*\* =  $p < .001$ , \*\* =  $p < .01$ , \* =  $p < .05$ , † =  $p < .10$

Table 14

*Prediction of transformative experiences, controlling for expectations and desires (24h vs. last week)*

| Criterion |   | Predictor           | b     | SE   | z     | p                 | $CI_{lower}^{95\%}$ | $CI_{upper}^{95\%}$ | $\beta$ |
|-----------|---|---------------------|-------|------|-------|-------------------|---------------------|---------------------|---------|
| TE        | ← | TE_Desire           | 0.23  | 0.04 | 6.26  | <.001***          | 0.16                | 0.30                | 0.23    |
| TE        | ← | TE_Expect           | 0.16  | 0.04 | 4.25  | <.001***          | 0.09                | 0.24                | 0.15    |
| TE        | ← | Psychedelics (24h)  | 0.77  | 0.15 | 5.02  | <.001***          | 0.47                | 1.08                | 0.15    |
| TE        | ← | Psychedelics (week) | 0.28  | 0.21 | 1.34  | .180              | -0.13               | 0.69                | 0.04    |
| TE        | ← | Nicotine            | 0.23  | 0.12 | 1.90  | .057 <sup>†</sup> | -0.01               | 0.47                | 0.05    |
| TE        | ← | Alcohol             | -0.52 | 0.14 | -3.68 | <.001***          | -0.80               | -0.24               | -0.10   |
| TE        | ← | Stimulants          | 0.22  | 0.16 | 1.42  | .156              | -0.08               | 0.53                | 0.04    |
| TE        | ← | Euphorics           | 0.21  | 0.15 | 1.39  | .165              | -0.09               | 0.50                | 0.04    |
| TE        | ← | Cannabinoids        | 0.07  | 0.12 | 0.54  | .592              | -0.18               | 0.31                | 0.02    |
| TE        | ← | Benzodiazepines     | -0.06 | 0.32 | -0.19 | .849              | -0.69               | 0.57                | -0.01   |
| TE        | ← | Inhalants           | -0.28 | 0.24 | -1.20 | .231              | -0.74               | 0.18                | -0.04   |
| TE        | ← | Narcotics           | -0.07 | 0.40 | -0.18 | .860              | -0.85               | 0.71                | -0.01   |
| TE        | ← | Others              | 0.31  | 0.24 | 1.29  | .198              | -0.16               | 0.79                | 0.04    |
| TE        | ← | Gender_1            | 0.10  | 0.40 | 0.24  | .808              | -0.69               | 0.88                | 0.02    |
| TE        | ← | Gender_2            | 0.21  | 0.40 | 0.52  | .606              | -0.58               | 0.99                | 0.05    |
| TE        | ← | Education_1         | 0.18  | 0.25 | 0.72  | .474              | -0.31               | 0.67                | 0.02    |
| TE        | ← | Education_2         | 0.47  | 0.17 | 2.72  | .006**            | 0.13                | 0.81                | 0.10    |
| TE        | ← | Education_3         | -0.23 | 0.19 | -1.23 | .219              | -0.60               | 0.14                | -0.04   |
| TE        | ← | Education_4         | 0.18  | 0.15 | 1.19  | .233              | -0.12               | 0.48                | 0.04    |
| TE        | ← | Age                 | 0.01  | 0.01 | 1.69  | .090 <sup>†</sup> | 0.00                | 0.02                | 0.05    |
| TE        | ← | Religion            | 0.09  | 0.03 | 2.82  | .005**            | 0.03                | 0.16                | 0.07    |
| TE        | ← | Conservatism        | -0.06 | 0.05 | -1.30 | .192              | -0.15               | 0.03                | -0.04   |

|                  |      |      |      |       |      |      |      |
|------------------|------|------|------|-------|------|------|------|
| $\Delta 24/week$ | 0.49 | 0.23 | 2.16 | .031* | 0.05 | 0.94 | 0.11 |
|------------------|------|------|------|-------|------|------|------|

---

*Note.* Enter notes. \*\*\* =  $p < .001$ , \*\* =  $p < .01$ , \* =  $p < .05$ , † =  $p < .10$

Table 15

*Prediction of epistemically transformative experiences (24h vs. last week)*

| Criterion        |   | Predictor           | b     | SE   | z     | p                 | $CI_{lower}^{95\%}$ | $CI_{upper}^{95\%}$ | $\beta$ |
|------------------|---|---------------------|-------|------|-------|-------------------|---------------------|---------------------|---------|
| ETE              | ← | Psychedelics (24h)  | 0.57  | 0.16 | 3.66  | <.001***          | 0.27                | 0.88                | 0.12    |
| ETE              | ← | Psychedelics (week) | 0.08  | 0.22 | 0.38  | .706              | -0.34               | 0.50                | 0.01    |
| ETE              | ← | Nicotine            | 0.11  | 0.13 | 0.85  | .397              | -0.14               | 0.35                | 0.03    |
| ETE              | ← | Alcohol             | -0.83 | 0.15 | -5.71 | <.001***          | -1.12               | -0.55               | -0.17   |
| ETE              | ← | Stimulants          | 0.40  | 0.16 | 2.47  | .014*             | 0.08                | 0.71                | 0.08    |
| ETE              | ← | Euphorics           | 0.16  | 0.15 | 1.06  | .288              | -0.14               | 0.47                | 0.04    |
| ETE              | ← | Cannabinoids        | 0.25  | 0.13 | 1.96  | .050*             | 0.00                | 0.49                | 0.06    |
| ETE              | ← | Benzodiazepines     | -0.20 | 0.33 | -0.59 | .554              | -0.84               | 0.45                | -0.02   |
| ETE              | ← | Inhalants           | -0.32 | 0.24 | -1.34 | .180              | -0.80               | 0.15                | -0.04   |
| ETE              | ← | Narcotics           | 0.11  | 0.40 | 0.28  | .777              | -0.67               | 0.90                | 0.01    |
| ETE              | ← | Others              | 0.69  | 0.25 | 2.72  | .006**            | 0.19                | 1.18                | 0.08    |
| ETE              | ← | Gender_1            | 0.02  | 0.41 | 0.05  | .959              | -0.79               | 0.83                | 0.01    |
| ETE              | ← | Gender_2            | -0.03 | 0.41 | -0.08 | .933              | -0.84               | 0.77                | -0.01   |
| ETE              | ← | Education_1         | 0.46  | 0.26 | 1.78  | .075 <sup>†</sup> | -0.05               | 0.97                | 0.06    |
| ETE              | ← | Education_2         | 0.24  | 0.18 | 1.34  | .181              | -0.11               | 0.59                | 0.05    |
| ETE              | ← | Education_3         | -0.10 | 0.19 | -0.51 | .610              | -0.48               | 0.28                | -0.02   |
| ETE              | ← | Education_4         | 0.07  | 0.16 | 0.47  | .635              | -0.23               | 0.38                | 0.02    |
| ETE              | ← | Age                 | 0.00  | 0.01 | -0.03 | .977              | -0.01               | 0.01                | 0.00    |
| ETE              | ← | Religion            | 0.14  | 0.03 | 4.08  | <.001***          | 0.07                | 0.21                | 0.11    |
| ETE              | ← | Conservatism        | -0.11 | 0.05 | -2.36 | .018*             | -0.21               | -0.02               | -0.07   |
| $\Delta 24/week$ |   |                     | 0.49  | 0.23 | 2.10  | .035*             | 0.03                | 0.95                | 0.10    |

Note. Enter notes. \*\*\* =  $p < .001$ , \*\* =  $p < .01$ , \* =  $p < .05$ , <sup>†</sup> =  $p < .10$

Table 16

*Prediction of epistemically transformative experiences, controlling for expectations and desires (24h vs. last week)*

| Criterion | Predictor             | b     | SE   | z     | p                 | $CI_{lower}^{95\%}$ | $CI_{upper}^{95\%}$ | $\beta$ |
|-----------|-----------------------|-------|------|-------|-------------------|---------------------|---------------------|---------|
| ETE       | ← TE_Desire           | 0.17  | 0.04 | 4.96  | <.001***          | 0.11                | 0.24                | 0.18    |
| ETE       | ← TE_Expect           | 0.10  | 0.04 | 2.74  | .006**            | 0.03                | 0.18                | 0.10    |
| ETE       | ← Psychedelics (24h)  | 0.48  | 0.15 | 3.15  | .002**            | 0.18                | 0.78                | 0.10    |
| ETE       | ← Psychedelics (week) | 0.06  | 0.21 | 0.28  | .781              | -0.35               | 0.47                | 0.01    |
| ETE       | ← Nicotine            | 0.12  | 0.12 | 1.01  | .314              | -0.12               | 0.36                | 0.03    |
| ETE       | ← Alcohol             | -0.73 | 0.14 | -5.11 | <.001***          | -1.00               | -0.45               | -0.15   |
| ETE       | ← Stimulants          | 0.36  | 0.16 | 2.34  | .019*             | 0.06                | 0.67                | 0.08    |
| ETE       | ← Euphorics           | 0.13  | 0.15 | 0.85  | .394              | -0.16               | 0.42                | 0.03    |
| ETE       | ← Cannabinoids        | 0.10  | 0.12 | 0.85  | .397              | -0.14               | 0.34                | 0.03    |
| ETE       | ← Benzodiazepines     | -0.28 | 0.32 | -0.89 | .375              | -0.91               | 0.34                | -0.03   |
| ETE       | ← Inhalants           | -0.37 | 0.23 | -1.59 | .113              | -0.83               | 0.09                | -0.05   |
| ETE       | ← Narcotics           | 0.18  | 0.39 | 0.47  | .640              | -0.58               | 0.95                | 0.02    |
| ETE       | ← Others              | 0.68  | 0.24 | 2.81  | .005**            | 0.21                | 1.16                | 0.08    |
| ETE       | ← Gender_1            | 0.15  | 0.40 | 0.38  | .701              | -0.63               | 0.94                | 0.04    |
| ETE       | ← Gender_2            | 0.10  | 0.40 | 0.24  | .809              | -0.68               | 0.88                | 0.02    |
| ETE       | ← Education_1         | 0.52  | 0.25 | 2.09  | .037*             | 0.03                | 1.01                | 0.06    |
| ETE       | ← Education_2         | 0.33  | 0.17 | 1.91  | .056 <sup>†</sup> | -0.01               | 0.67                | 0.07    |
| ETE       | ← Education_3         | 0.03  | 0.19 | 0.14  | .892              | -0.34               | 0.39                | 0.00    |
| ETE       | ← Education_4         | 0.17  | 0.15 | 1.11  | .266              | -0.13               | 0.46                | 0.04    |
| ETE       | ← Age                 | 0.01  | 0.01 | 1.14  | .253              | 0.00                | 0.02                | 0.03    |
| ETE       | ← Religion            | 0.10  | 0.03 | 3.06  | .002**            | 0.04                | 0.17                | 0.08    |
| ETE       | ← Conservatism        | -0.09 | 0.05 | -1.90 | .058 <sup>†</sup> | -0.18               | 0.00                | -0.05   |

---

|                  |      |      |      |                   |       |      |      |
|------------------|------|------|------|-------------------|-------|------|------|
| $\Delta 24/week$ | 0.42 | 0.23 | 1.86 | .063 <sup>†</sup> | -0.02 | 0.87 | 0.09 |
|------------------|------|------|------|-------------------|-------|------|------|

---

*Note.* Enter notes. \*\*\* =  $p < .001$ , \*\* =  $p < .01$ , \* =  $p < .05$ , <sup>†</sup> =  $p < .10$

Table 17

*Prediction of social connectedness (24h vs. last week)*

| Criterion   | Predictor             | b     | SE   | z     | p      | CI <sub>lower</sub> <sup>95%</sup> | CI <sub>upper</sub> <sup>95%</sup> | β     |
|-------------|-----------------------|-------|------|-------|--------|------------------------------------|------------------------------------|-------|
| Social Con. | ← Psychedelics (24h)  | 0.36  | 0.13 | 2.76  | .006** | 0.10                               | 0.62                               | 0.09  |
| Social Con. | ← Psychedelics (week) | 0.28  | 0.18 | 1.56  | .119   | -0.07                              | 0.63                               | 0.05  |
| Social Con. | ← Nicotine            | 0.11  | 0.10 | 1.05  | .295   | -0.09                              | 0.31                               | 0.03  |
| Social Con. | ← Alcohol             | -0.19 | 0.12 | -1.62 | .105   | -0.43                              | 0.04                               | -0.05 |
| Social Con. | ← Stimulants          | -0.06 | 0.13 | -0.43 | .664   | -0.32                              | 0.20                               | -0.02 |
| Social Con. | ← Euphorics           | 0.11  | 0.13 | 0.85  | .396   | -0.14                              | 0.36                               | 0.03  |
| Social Con. | ← Cannabinoids        | 0.17  | 0.10 | 1.61  | .107   | -0.04                              | 0.37                               | 0.05  |
| Social Con. | ← Benzodiazepines     | -0.16 | 0.27 | -0.58 | .564   | -0.70                              | 0.38                               | -0.02 |
| Social Con. | ← Inhalants           | -0.08 | 0.20 | -0.40 | .687   | -0.48                              | 0.31                               | -0.01 |
| Social Con. | ← Narcotics           | 0.33  | 0.34 | 1.00  | .319   | -0.32                              | 0.99                               | 0.04  |
| Social Con. | ← Others              | -0.05 | 0.21 | -0.26 | .795   | -0.46                              | 0.35                               | -0.01 |
| Social Con. | ← Gender_1            | -0.33 | 0.36 | -0.92 | .360   | -1.03                              | 0.37                               | -0.10 |
| Social Con. | ← Gender_2            | -0.04 | 0.36 | -0.11 | .914   | -0.74                              | 0.66                               | -0.01 |
| Social Con. | ← Education_1         | -0.06 | 0.21 | -0.30 | .762   | -0.48                              | 0.35                               | -0.01 |
| Social Con. | ← Education_2         | -0.08 | 0.15 | -0.57 | .568   | -0.37                              | 0.20                               | -0.02 |
| Social Con. | ← Education_3         | 0.04  | 0.16 | 0.22  | .824   | -0.28                              | 0.35                               | 0.01  |
| Social Con. | ← Education_4         | -0.17 | 0.13 | -1.30 | .194   | -0.42                              | 0.08                               | -0.05 |
| Social Con. | ← Age                 | 0.01  | 0.00 | 2.21  | .027*  | 0.00                               | 0.02                               | 0.07  |
| Social Con. | ← Religion            | 0.08  | 0.03 | 2.75  | .006** | 0.02                               | 0.13                               | 0.08  |

|                            |      |      |      |      |       |      |      |
|----------------------------|------|------|------|------|-------|------|------|
| Social Con. ← Conservatism | 0.03 | 0.04 | 0.67 | .505 | -0.05 | 0.10 | 0.02 |
| $\Delta 24/week$           | 0.08 | 0.20 | 0.42 | .675 | -0.30 | 0.46 | 0.04 |

*Note.* Enter notes. \*\*\* =  $p < .001$ , \*\* =  $p < .01$ , \* =  $p < .05$ , † =  $p < .10$

Table 18

*Prediction of mood (24h vs. last week)*

| Criterion | Predictor             | b     | SE   | z     | p        | $CI_{lower}^{95\%}$ | $CI_{upper}^{95\%}$ | $\beta$ |
|-----------|-----------------------|-------|------|-------|----------|---------------------|---------------------|---------|
| Mood      | ← Psychedelics (24h)  | 0.22  | 0.07 | 3.38  | <.001*** | 0.09                | 0.35                | 0.11    |
| Mood      | ← Psychedelics (week) | -0.05 | 0.09 | -0.56 | .577     | -0.22               | 0.12                | -0.02   |
| Mood      | ← Nicotine            | 0.06  | 0.05 | 1.23  | .217     | -0.04               | 0.17                | 0.04    |
| Mood      | ← Alcohol             | -0.15 | 0.06 | -2.50 | .012*    | -0.27               | -0.03               | -0.08   |
| Mood      | ← Stimulants          | 0.10  | 0.07 | 1.55  | .121     | -0.03               | 0.23                | 0.05    |
| Mood      | ← Euphorics           | -0.01 | 0.06 | -0.12 | .906     | -0.13               | 0.12                | 0.00    |
| Mood      | ← Cannabinoids        | 0.06  | 0.05 | 1.19  | .235     | -0.04               | 0.16                | 0.04    |
| Mood      | ← Benzodiazepines     | -0.16 | 0.14 | -1.19 | .236     | -0.43               | 0.11                | -0.04   |
| Mood      | ← Inhalants           | 0.01  | 0.10 | 0.14  | .886     | -0.18               | 0.21                | 0.00    |
| Mood      | ← Narcotics           | -0.11 | 0.17 | -0.65 | .515     | -0.44               | 0.22                | -0.02   |
| Mood      | ← Others              | -0.10 | 0.10 | -0.98 | .329     | -0.30               | 0.10                | -0.03   |
| Mood      | ← Gender_1            | 0.17  | 0.18 | 0.95  | .340     | -0.18               | 0.52                | 0.11    |
| Mood      | ← Gender_2            | 0.23  | 0.18 | 1.29  | .196     | -0.12               | 0.58                | 0.15    |
| Mood      | ← Education_1         | 0.00  | 0.11 | 0.01  | .994     | -0.21               | 0.21                | 0.00    |
| Mood      | ← Education_2         | -0.13 | 0.07 | -1.85 | .065†    | -0.28               | 0.01                | -0.07   |
| Mood      | ← Education_3         | -0.15 | 0.08 | -1.88 | .059†    | -0.30               | 0.01                | -0.07   |
| Mood      | ← Education_4         | -0.13 | 0.06 | -2.05 | .040*    | -0.26               | -0.01               | -0.08   |
| Mood      | ← Age                 | 0.01  | 0.00 | 2.53  | .011*    | 0.00                | 0.01                | 0.08    |

|                  |   |              |       |      |       |        |       |      |       |
|------------------|---|--------------|-------|------|-------|--------|-------|------|-------|
| Mood             | ← | Religion     | 0.01  | 0.01 | 0.50  | .620   | -0.02 | 0.03 | 0.01  |
| Mood             | ← | Conservatism | -0.01 | 0.02 | -0.72 | .475   | -0.05 | 0.02 | -0.02 |
| $\Delta 24/week$ |   |              | 0.27  | 0.10 | 2.79  | .005** | 0.08  | 0.46 | 0.13  |

---

*Note.* Enter notes. \*\*\* =  $p < .001$ , \*\* =  $p < .01$ , \* =  $p < .05$ , † =  $p < .10$

**Mediation analyses (24h vs. week prior)**

The following tables show results of the mediation analyses reported in the paper, differentiating between very recent (last 24h) and moderately recent (last week) use of psychedelic substances.

Table 19

*Prediction of mood via social connectedness (24h vs. last week)*

| Criterion   | Predictor             | b     | SE   | z     | p        | $CI_{lower}^{95\%}$ | $CI_{upper}^{95\%}$ | $\beta$ |
|-------------|-----------------------|-------|------|-------|----------|---------------------|---------------------|---------|
| Social Con. | ← Psychedelics (24h)  | 0.36  | 0.13 | 2.74  | .006**   | 0.10                | 0.62                | 0.09    |
| Social Con. | ← Psychedelics (week) | 0.28  | 0.18 | 1.55  | .121     | -0.07               | 0.63                | 0.05    |
| Social Con. | ← Nicotine            | 0.11  | 0.10 | 1.04  | .297     | -0.10               | 0.31                | 0.03    |
| Social Con. | ← Alcohol             | -0.20 | 0.12 | -1.64 | .101     | -0.43               | 0.04                | -0.05   |
| Social Con. | ← Stimulants          | -0.05 | 0.13 | -0.41 | .684     | -0.32               | 0.21                | -0.01   |
| Social Con. | ← Euphorics           | 0.11  | 0.13 | 0.87  | .385     | -0.14               | 0.36                | 0.03    |
| Social Con. | ← Cannabinoids        | 0.17  | 0.10 | 1.63  | .102     | -0.03               | 0.37                | 0.05    |
| Social Con. | ← Benzodiazepines     | -0.16 | 0.27 | -0.57 | .570     | -0.69               | 0.38                | -0.02   |
| Social Con. | ← Inhalants           | -0.09 | 0.20 | -0.45 | .654     | -0.48               | 0.30                | -0.01   |
| Social Con. | ← Narcotics           | 0.34  | 0.34 | 1.01  | .314     | -0.32               | 1.00                | 0.04    |
| Social Con. | ← Others              | -0.06 | 0.21 | -0.27 | .787     | -0.46               | 0.35                | -0.01   |
| Social Con. | ← Gender_1            | -0.34 | 0.36 | -0.97 | .334     | -1.04               | 0.35                | -0.11   |
| Social Con. | ← Gender_2            | -0.06 | 0.36 | -0.16 | .870     | -0.75               | 0.64                | -0.02   |
| Social Con. | ← Education_1         | -0.06 | 0.21 | -0.28 | .780     | -0.48               | 0.36                | -0.01   |
| Social Con. | ← Education_2         | -0.08 | 0.15 | -0.58 | .564     | -0.37               | 0.20                | -0.02   |
| Social Con. | ← Education_3         | 0.04  | 0.16 | 0.23  | .822     | -0.27               | 0.35                | 0.01    |
| Social Con. | ← Education_4         | -0.16 | 0.13 | -1.29 | .198     | -0.42               | 0.09                | -0.05   |
| Social Con. | ← Age                 | 0.01  | 0.00 | 2.22  | .026*    | 0.00                | 0.02                | 0.07    |
| Social Con. | ← Religion            | 0.08  | 0.03 | 2.77  | .006**   | 0.02                | 0.13                | 0.08    |
| Social Con. | ← Conservatism        | 0.03  | 0.04 | 0.68  | .499     | -0.05               | 0.10                | 0.02    |
| Mood        | ← Social Con.         | 0.11  | 0.01 | 8.03  | <.001*** | 0.09                | 0.14                | 0.23    |
| Mood        | ← Psychedelics (24h)  | 0.18  | 0.06 | 2.78  | .005**   | 0.05                | 0.30                | 0.09    |
| Mood        | ← Psychedelics (week) | -0.08 | 0.09 | -0.96 | .335     | -0.25               | 0.09                | -0.03   |

|          |    |                 |       |      |       |                   |       |       |       |
|----------|----|-----------------|-------|------|-------|-------------------|-------|-------|-------|
| Mood     | ←  | Nicotine        | 0.05  | 0.05 | 1.06  | .290              | -0.05 | 0.15  | 0.03  |
| Mood     | ←  | Alcohol         | -0.13 | 0.06 | -2.23 | .026*             | -0.24 | -0.02 | -0.07 |
| Mood     | ←  | Stimulants      | 0.11  | 0.06 | 1.69  | .091 <sup>†</sup> | -0.02 | 0.24  | 0.06  |
| Mood     | ←  | Euphorics       | -0.02 | 0.06 | -0.31 | .756              | -0.14 | 0.10  | -0.01 |
| Mood     | ←  | Cannabinoids    | 0.04  | 0.05 | 0.87  | .382              | -0.06 | 0.14  | 0.03  |
| Mood     | ←  | Benzodiazepines | -0.14 | 0.13 | -1.07 | .284              | -0.41 | 0.12  | -0.04 |
| Mood     | ←  | Inhalants       | 0.03  | 0.10 | 0.27  | .785              | -0.16 | 0.22  | 0.01  |
| Mood     | ←  | Narcotics       | -0.14 | 0.16 | -0.87 | .384              | -0.46 | 0.18  | -0.03 |
| Mood     | ←  | Others          | -0.10 | 0.10 | -0.97 | .330              | -0.30 | 0.10  | -0.03 |
| Mood     | ←  | Gender_1        | 0.19  | 0.17 | 1.12  | .263              | -0.15 | 0.54  | 0.12  |
| Mood     | ←  | Gender_2        | 0.22  | 0.17 | 1.28  | .200              | -0.12 | 0.56  | 0.14  |
| Mood     | ←  | Education_1     | 0.01  | 0.10 | 0.06  | .955              | -0.20 | 0.21  | 0.00  |
| Mood     | ←  | Education_2     | -0.13 | 0.07 | -1.80 | .071 <sup>†</sup> | -0.27 | 0.01  | -0.07 |
| Mood     | ←  | Education_3     | -0.15 | 0.08 | -1.99 | .046*             | -0.30 | 0.00  | -0.07 |
| Mood     | ←  | Education_4     | -0.11 | 0.06 | -1.83 | .068 <sup>†</sup> | -0.24 | 0.01  | -0.07 |
| Mood     | ←  | Age             | 0.00  | 0.00 | 2.05  | .040*             | 0.00  | 0.01  | 0.06  |
| Mood     | ←  | Religion        | 0.00  | 0.01 | -0.18 | .858              | -0.03 | 0.02  | -0.01 |
| Mood     | ←  | Conservatism    | -0.02 | 0.02 | -0.86 | .389              | -0.05 | 0.02  | -0.03 |
| Indirect | on | Mood            | 0.04  | 0.02 | 2.60  | .009**            | 0.01  | 0.07  | 0.02  |
| Direct   | on | Mood            | 0.18  | 0.06 | 2.78  | .005**            | 0.05  | 0.30  | 0.09  |
| Total    | on | Mood            | 0.22  | 0.07 | 3.34  | <.001***          | 0.09  | 0.35  | 0.11  |

*Note.* Indirect, direct, and total effects represent effects of psychedelic substance use on mood via social connectedness (24h vs. last week) \*\*\* =  $p < .001$ , \*\* =  $p < .01$ , \* =  $p < .05$ , <sup>†</sup> =  $p < .10$

Table 20

*Prediction of mood via self-reported transformative experiences (24h vs. last week)*

| Criterion |   | Predictor           | b     | SE   | z     | p                 | $CI_{lower}^{95\%}$ | $CI_{upper}^{95\%}$ | $\beta$ |
|-----------|---|---------------------|-------|------|-------|-------------------|---------------------|---------------------|---------|
| TE        | ← | TE_Expect           | 0.16  | 0.04 | 4.24  | <.001***          | 0.09                | 0.24                | 0.15    |
| TE        | ← | TE_Desire           | 0.23  | 0.04 | 6.27  | <.001***          | 0.16                | 0.30                | 0.23    |
| TE        | ← | Psychedelics (24h)  | 0.77  | 0.15 | 5.02  | <.001***          | 0.47                | 1.08                | 0.15    |
| TE        | ← | Psychedelics (week) | 0.28  | 0.21 | 1.36  | .174              | -0.13               | 0.69                | 0.04    |
| TE        | ← | Nicotine            | 0.23  | 0.12 | 1.89  | .059 <sup>†</sup> | -0.01               | 0.47                | 0.05    |
| TE        | ← | Alcohol             | -0.52 | 0.14 | -3.67 | <.001***          | -0.80               | -0.24               | -0.10   |
| TE        | ← | Stimulants          | 0.22  | 0.16 | 1.42  | .156              | -0.08               | 0.53                | 0.04    |
| TE        | ← | Euphorics           | 0.21  | 0.15 | 1.40  | .160              | -0.08               | 0.51                | 0.04    |
| TE        | ← | Cannabinoids        | 0.06  | 0.12 | 0.52  | .602              | -0.18               | 0.31                | 0.02    |
| TE        | ← | Benzodiazepines     | -0.06 | 0.32 | -0.18 | .856              | -0.69               | 0.57                | -0.01   |
| TE        | ← | Inhalants           | -0.29 | 0.24 | -1.21 | .226              | -0.75               | 0.18                | -0.04   |
| TE        | ← | Narcotics           | -0.07 | 0.40 | -0.17 | .865              | -0.84               | 0.71                | -0.01   |
| TE        | ← | Others              | 0.31  | 0.24 | 1.28  | .202              | -0.17               | 0.79                | 0.03    |
| TE        | ← | Gender_1            | 0.10  | 0.40 | 0.24  | .811              | -0.69               | 0.88                | 0.02    |
| TE        | ← | Gender_2            | 0.21  | 0.40 | 0.51  | .607              | -0.58               | 0.99                | 0.05    |
| TE        | ← | Education_1         | 0.18  | 0.25 | 0.72  | .473              | -0.31               | 0.67                | 0.02    |
| TE        | ← | Education_2         | 0.46  | 0.17 | 2.69  | .007**            | 0.13                | 0.80                | 0.09    |
| TE        | ← | Education_3         | -0.23 | 0.19 | -1.25 | .210              | -0.60               | 0.13                | -0.04   |
| TE        | ← | Education_4         | 0.17  | 0.15 | 1.15  | .249              | -0.12               | 0.47                | 0.04    |
| TE        | ← | Age                 | 0.01  | 0.01 | 1.67  | .094 <sup>†</sup> | 0.00                | 0.02                | 0.05    |
| TE        | ← | Religion            | 0.09  | 0.03 | 2.82  | .005**            | 0.03                | 0.16                | 0.07    |
| TE        | ← | Conservatism        | -0.06 | 0.05 | -1.30 | .192              | -0.15               | 0.03                | -0.04   |
| Mood      | ← | TE                  | 0.08  | 0.01 | 6.93  | <.001***          | 0.06                | 0.10                | 0.20    |

|          |    |                     |       |      |       |          |       |       |       |
|----------|----|---------------------|-------|------|-------|----------|-------|-------|-------|
| Mood     | ←  | Psychedelics (24h)  | 0.15  | 0.06 | 2.31  | .021*    | 0.02  | 0.28  | 0.08  |
| Mood     | ←  | Psychedelics (week) | -0.08 | 0.09 | -0.88 | .381     | -0.25 | 0.09  | -0.03 |
| Mood     | ←  | Nicotine            | 0.05  | 0.05 | 0.93  | .355     | -0.05 | 0.15  | 0.03  |
| Mood     | ←  | Alcohol             | -0.10 | 0.06 | -1.61 | .108     | -0.21 | 0.02  | -0.05 |
| Mood     | ←  | Stimulants          | 0.08  | 0.07 | 1.25  | .211     | -0.05 | 0.21  | 0.04  |
| Mood     | ←  | Euphorics           | -0.03 | 0.06 | -0.46 | .648     | -0.15 | 0.09  | -0.02 |
| Mood     | ←  | Cannabinoids        | 0.04  | 0.05 | 0.80  | .422     | -0.06 | 0.14  | 0.03  |
| Mood     | ←  | Benzodiazepines     | -0.17 | 0.13 | -1.24 | .216     | -0.43 | 0.10  | -0.04 |
| Mood     | ←  | Inhalants           | 0.03  | 0.10 | 0.34  | .737     | -0.16 | 0.22  | 0.01  |
| Mood     | ←  | Narcotics           | -0.09 | 0.16 | -0.56 | .575     | -0.41 | 0.23  | -0.02 |
| Mood     | ←  | Others              | -0.13 | 0.10 | -1.25 | .212     | -0.33 | 0.07  | -0.04 |
| Mood     | ←  | Gender_1            | 0.16  | 0.17 | 0.93  | .351     | -0.18 | 0.51  | 0.10  |
| Mood     | ←  | Gender_2            | 0.22  | 0.17 | 1.24  | .216     | -0.13 | 0.56  | 0.14  |
| Mood     | ←  | Education_1         | -0.01 | 0.10 | -0.10 | .918     | -0.22 | 0.19  | 0.00  |
| Mood     | ←  | Education_2         | -0.16 | 0.07 | -2.26 | .024*    | -0.30 | -0.02 | -0.09 |
| Mood     | ←  | Education_3         | -0.12 | 0.08 | -1.54 | .124     | -0.27 | 0.03  | -0.05 |
| Mood     | ←  | Education_4         | -0.14 | 0.06 | -2.17 | .030*    | -0.26 | -0.01 | -0.08 |
| Mood     | ←  | Age                 | 0.01  | 0.00 | 2.61  | .009**   | 0.00  | 0.01  | 0.08  |
| Mood     | ←  | Religion            | 0.00  | 0.01 | -0.27 | .787     | -0.03 | 0.02  | -0.01 |
| Mood     | ←  | Conservatism        | -0.01 | 0.02 | -0.35 | .724     | -0.04 | 0.03  | -0.01 |
| Direct   | on | Mood                | 0.15  | 0.06 | 2.31  | .021*    | 0.02  | 0.28  | 0.08  |
| Indirect | on | Mood                | 0.06  | 0.01 | 4.07  | <.001*** | 0.03  | 0.09  | 0.03  |
| Total    | on | Mood                | 0.21  | 0.07 | 3.23  | .001**   | 0.08  | 0.34  | 0.11  |

*Note.* Indirect, direct, and total effects represent effects of psychedelic substance use on mood via self-reported transformative experiences (24h vs. last week) \*\*\* =  $p < .001$ , \*\* =  $p < .01$ , \* =  $p < .05$ , † =  $p < .10$

**24h use of substances only**

The following tables show results of the analyses we performed including only very recent use (in the last 24 hours) of the different substances. Also included are the co-variables specified in the pre-registration.

Table 21

*Prediction of transformative experiences (24h only)*

| Criterion |   | Predictor             | b     | SE   | z     | p                 | $CI_{lower}^{95\%}$ | $CI_{upper}^{95\%}$ | $\beta$ |
|-----------|---|-----------------------|-------|------|-------|-------------------|---------------------|---------------------|---------|
| TE        | ← | Psychedelics (24h)    | 0.90  | 0.16 | 5.53  | <.001***          | 0.58                | 1.22                | 0.17    |
| TE        | ← | Nicotine (24h)        | 0.29  | 0.13 | 2.18  | .029*             | 0.03                | 0.55                | 0.06    |
| TE        | ← | Alcohol (24h)         | -0.51 | 0.13 | -3.99 | <.001***          | -0.77               | -0.26               | -0.12   |
| TE        | ← | Stimulants (24h)      | 0.33  | 0.19 | 1.74  | .082 <sup>†</sup> | -0.04               | 0.70                | 0.05    |
| TE        | ← | Euphorics (24h)       | 0.29  | 0.18 | 1.60  | .109              | -0.06               | 0.65                | 0.05    |
| TE        | ← | Cannabinoids (24h)    | 0.36  | 0.13 | 2.79  | .005**            | 0.11                | 0.62                | 0.09    |
| TE        | ← | Benzodiazepines (24h) | -0.15 | 0.43 | -0.34 | .732              | -0.99               | 0.70                | -0.01   |
| TE        | ← | Inhalants (24h)       | -0.65 | 0.32 | -2.01 | .044*             | -1.29               | -0.02               | -0.06   |
| TE        | ← | Narcotics (24h)       | -0.17 | 0.57 | -0.29 | .769              | -1.30               | 0.96                | -0.01   |
| TE        | ← | Others (24h)          | 0.32  | 0.31 | 1.05  | .295              | -0.28               | 0.92                | 0.03    |
| TE        | ← | Gender_1              | -0.11 | 0.43 | -0.26 | .799              | -0.95               | 0.73                | -0.03   |
| TE        | ← | Gender_2              | -0.03 | 0.43 | -0.08 | .938              | -0.87               | 0.80                | -0.01   |
| TE        | ← | Education_1           | 0.10  | 0.27 | 0.39  | .697              | -0.42               | 0.63                | 0.01    |
| TE        | ← | Education_2           | 0.30  | 0.18 | 1.64  | .101              | -0.06               | 0.66                | 0.06    |
| TE        | ← | Education_3           | -0.47 | 0.20 | -2.38 | .017*             | -0.86               | -0.08               | -0.08   |
| TE        | ← | Education_4           | 0.01  | 0.16 | 0.05  | .956              | -0.31               | 0.32                | 0.00    |
| TE        | ← | Age                   | 0.00  | 0.01 | 0.13  | .895              | -0.01               | 0.01                | 0.00    |
| TE        | ← | Religion              | 0.15  | 0.04 | 4.32  | <.001***          | 0.08                | 0.22                | 0.12    |
| TE        | ← | Conservatism          | -0.09 | 0.05 | -1.85 | .064 <sup>†</sup> | -0.19               | 0.01                | -0.05   |

*Note.* Enter notes. \*\*\* =  $p < .001$ , \*\* =  $p < .01$ , \* =  $p < .05$ , <sup>†</sup> =  $p < .10$

Table 22

*Prediction of expectations of transformative experiences (24h only)*

| Criterion | Predictor               | b     | SE   | z     | p                 | $CI_{lower}^{95\%}$ | $CI_{upper}^{95\%}$ | $\beta$ |
|-----------|-------------------------|-------|------|-------|-------------------|---------------------|---------------------|---------|
| TE_Expect | ← Psychedelics (24h)    | 0.39  | 0.16 | 2.47  | .014*             | 0.08                | 0.69                | 0.08    |
| TE_Expect | ← Nicotine (24h)        | -0.06 | 0.13 | -0.46 | .647              | -0.31               | 0.19                | -0.01   |
| TE_Expect | ← Alcohol (24h)         | -0.09 | 0.13 | -0.70 | .484              | -0.33               | 0.16                | -0.02   |
| TE_Expect | ← Stimulants (24h)      | 0.18  | 0.18 | 0.97  | .331              | -0.18               | 0.54                | 0.03    |
| TE_Expect | ← Euphorics (24h)       | 0.06  | 0.17 | 0.35  | .725              | -0.28               | 0.40                | 0.01    |
| TE_Expect | ← Cannabinoids (24h)    | 0.44  | 0.13 | 3.48  | <.001***          | 0.19                | 0.68                | 0.11    |
| TE_Expect | ← Benzodiazepines (24h) | -0.19 | 0.41 | -0.47 | .636              | -1.00               | 0.61                | -0.02   |
| TE_Expect | ← Inhalants (24h)       | -0.04 | 0.32 | -0.11 | .911              | -0.66               | 0.59                | 0.00    |
| TE_Expect | ← Narcotics (24h)       | 0.74  | 0.56 | 1.33  | .183              | -0.35               | 1.84                | 0.05    |
| TE_Expect | ← Others (24h)          | -0.27 | 0.30 | -0.91 | .365              | -0.85               | 0.31                | -0.03   |
| TE_Expect | ← Gender_1              | -0.76 | 0.42 | -1.83 | .067 <sup>†</sup> | -1.58               | 0.05                | -0.20   |
| TE_Expect | ← Gender_2              | -0.79 | 0.41 | -1.91 | .056 <sup>†</sup> | -1.61               | 0.02                | -0.21   |
| TE_Expect | ← Education_1           | -0.27 | 0.26 | -1.06 | .291              | -0.77               | 0.23                | -0.03   |
| TE_Expect | ← Education_2           | -0.23 | 0.18 | -1.31 | .190              | -0.58               | 0.12                | -0.05   |
| TE_Expect | ← Education_3           | -0.44 | 0.20 | -2.25 | .025*             | -0.82               | -0.06               | -0.08   |
| TE_Expect | ← Education_4           | -0.31 | 0.16 | -1.97 | .049*             | -0.62               | 0.00                | -0.08   |
| TE_Expect | ← Age                   | -0.02 | 0.01 | -2.95 | .003**            | -0.03               | -0.01               | -0.10   |
| TE_Expect | ← Religion              | 0.13  | 0.03 | 3.74  | <.001***          | 0.06                | 0.20                | 0.11    |
| TE_Expect | ← Conservatism          | -0.05 | 0.05 | -0.95 | .341              | -0.14               | 0.05                | -0.03   |

Note. Enter notes. \*\*\* =  $p < .001$ , \*\* =  $p < .01$ , \* =  $p < .05$ , <sup>†</sup> =  $p < .10$

Table 23

*Prediction of desire for transformative experiences (24h only)*

| Criterion | Predictor               | b     | SE   | z     | p        | $CI_{lower}^{95\%}$ | $CI_{upper}^{95\%}$ | $\beta$ |
|-----------|-------------------------|-------|------|-------|----------|---------------------|---------------------|---------|
| TE_Desire | ← Psychedelics (24h)    | 0.34  | 0.17 | 2.07  | .039*    | 0.02                | 0.67                | 0.07    |
| TE_Desire | ← Nicotine (24h)        | -0.12 | 0.14 | -0.91 | .365     | -0.40               | 0.15                | -0.03   |
| TE_Desire | ← Alcohol (24h)         | -0.30 | 0.13 | -2.23 | .026*    | -0.56               | -0.04               | -0.07   |
| TE_Desire | ← Stimulants (24h)      | 0.11  | 0.19 | 0.58  | .563     | -0.27               | 0.49                | 0.02    |
| TE_Desire | ← Euphorics (24h)       | -0.08 | 0.19 | -0.42 | .678     | -0.44               | 0.29                | -0.01   |
| TE_Desire | ← Cannabinoids (24h)    | 0.63  | 0.13 | 4.71  | <.001*** | 0.37                | 0.90                | 0.15    |
| TE_Desire | ← Benzodiazepines (24h) | 0.63  | 0.44 | 1.44  | .151     | -0.23               | 1.49                | 0.05    |
| TE_Desire | ← Inhalants (24h)       | 0.18  | 0.34 | 0.52  | .603     | -0.49               | 0.84                | 0.02    |
| TE_Desire | ← Narcotics (24h)       | -0.24 | 0.60 | -0.40 | .687     | -1.41               | 0.93                | -0.01   |
| TE_Desire | ← Others (24h)          | -0.12 | 0.32 | -0.37 | .712     | -0.74               | 0.50                | -0.01   |
| TE_Desire | ← Gender_1              | -0.39 | 0.46 | -0.86 | .389     | -1.28               | 0.50                | -0.09   |
| TE_Desire | ← Gender_2              | -0.44 | 0.45 | -0.96 | .335     | -1.33               | 0.45                | -0.11   |
| TE_Desire | ← Education_1           | -0.26 | 0.27 | -0.94 | .345     | -0.80               | 0.28                | -0.03   |
| TE_Desire | ← Education_2           | -0.45 | 0.19 | -2.37 | .018*    | -0.83               | -0.08               | -0.09   |
| TE_Desire | ← Education_3           | -0.54 | 0.21 | -2.60 | .009**   | -0.95               | -0.13               | -0.09   |
| TE_Desire | ← Education_4           | -0.40 | 0.17 | -2.38 | .017*    | -0.73               | -0.07               | -0.09   |
| TE_Desire | ← Age                   | -0.03 | 0.01 | -4.40 | <.001*** | -0.04               | -0.01               | -0.14   |
| TE_Desire | ← Religion              | 0.16  | 0.04 | 4.41  | <.001*** | 0.09                | 0.23                | 0.13    |
| TE_Desire | ← Conservatism          | -0.13 | 0.05 | -2.59 | .010**   | -0.23               | -0.03               | -0.08   |

*Note.* Enter notes. \*\*\* =  $p < .001$ , \*\* =  $p < .01$ , \* =  $p < .05$ , † =  $p < .10$

Table 24

*Prediction of transformative experiences, controlling for expectations and desires (24h only)*

| Criterion | Predictor               | b     | SE   | z     | p                 | $CI_{lower}^{95\%}$ | $CI_{upper}^{95\%}$ | $\beta$ |
|-----------|-------------------------|-------|------|-------|-------------------|---------------------|---------------------|---------|
| TE        | ← TE_Desire             | 0.24  | 0.04 | 6.53  | <.001***          | 0.16                | 0.31                | 0.24    |
| TE        | ← TE_Expect             | 0.16  | 0.04 | 4.22  | <.001***          | 0.09                | 0.24                | 0.15    |
| TE        | ← Psychedelics (24h)    | 0.76  | 0.15 | 4.96  | <.001***          | 0.46                | 1.05                | 0.14    |
| TE        | ← Nicotine (24h)        | 0.33  | 0.12 | 2.61  | .009**            | 0.08                | 0.57                | 0.07    |
| TE        | ← Alcohol (24h)         | -0.43 | 0.12 | -3.53 | <.001***          | -0.66               | -0.19               | -0.10   |
| TE        | ← Stimulants (24h)      | 0.28  | 0.18 | 1.60  | .110              | -0.06               | 0.63                | 0.05    |
| TE        | ← Euphorics (24h)       | 0.30  | 0.17 | 1.75  | .080 <sup>†</sup> | -0.04               | 0.63                | 0.05    |
| TE        | ← Cannabinoids (24h)    | 0.14  | 0.12 | 1.14  | .253              | -0.10               | 0.38                | 0.03    |
| TE        | ← Benzodiazepines (24h) | -0.27 | 0.40 | -0.68 | .496              | -1.07               | 0.52                | -0.02   |
| TE        | ← Inhalants (24h)       | -0.68 | 0.30 | -2.23 | .025*             | -1.28               | -0.08               | -0.06   |
| TE        | ← Narcotics (24h)       | -0.20 | 0.54 | -0.36 | .717              | -1.25               | 0.86                | -0.01   |
| TE        | ← Others (24h)          | 0.39  | 0.29 | 1.37  | .170              | -0.17               | 0.96                | 0.04    |
| TE        | ← Gender_1              | 0.10  | 0.40 | 0.24  | .807              | -0.69               | 0.88                | 0.02    |
| TE        | ← Gender_2              | 0.19  | 0.40 | 0.47  | .635              | -0.60               | 0.98                | 0.05    |
| TE        | ← Education_1           | 0.21  | 0.25 | 0.84  | .401              | -0.28               | 0.70                | 0.02    |
| TE        | ← Education_2           | 0.44  | 0.17 | 2.58  | .010**            | 0.11                | 0.78                | 0.09    |
| TE        | ← Education_3           | -0.27 | 0.19 | -1.43 | .153              | -0.63               | 0.10                | -0.04   |
| TE        | ← Education_4           | 0.16  | 0.15 | 1.09  | .277              | -0.13               | 0.46                | 0.04    |
| TE        | ← Age                   | 0.01  | 0.01 | 1.96  | .050*             | 0.00                | 0.02                | 0.06    |
| TE        | ← Religion              | 0.09  | 0.03 | 2.83  | .005**            | 0.03                | 0.16                | 0.07    |
| TE        | ← Conservatism          | -0.06 | 0.05 | -1.23 | .218              | -0.15               | 0.03                | -0.03   |

Note. Enter notes. \*\*\* =  $p < .001$ , \*\* =  $p < .01$ , \* =  $p < .05$ , <sup>†</sup> =  $p < .10$

Table 25

*Prediction of epistemically transformative experiences (24h only)*

| Criterion | Predictor               | b     | SE   | z     | p                 | $CI_{lower}^{95\%}$ | $CI_{upper}^{95\%}$ | $\beta$ |
|-----------|-------------------------|-------|------|-------|-------------------|---------------------|---------------------|---------|
| ETE       | ← Psychedelics (24h)    | 0.56  | 0.16 | 3.56  | <.001***          | 0.25                | 0.86                | 0.11    |
| ETE       | ← Nicotine (24h)        | 0.07  | 0.13 | 0.56  | .573              | -0.18               | 0.32                | 0.02    |
| ETE       | ← Alcohol (24h)         | -0.64 | 0.13 | -5.12 | <.001***          | -0.89               | -0.40               | -0.15   |
| ETE       | ← Stimulants (24h)      | 0.27  | 0.18 | 1.48  | .139              | -0.09               | 0.62                | 0.05    |
| ETE       | ← Euphorics (24h)       | 0.13  | 0.17 | 0.76  | .450              | -0.21               | 0.47                | 0.02    |
| ETE       | ← Cannabinoids (24h)    | 0.45  | 0.13 | 3.60  | <.001***          | 0.21                | 0.70                | 0.11    |
| ETE       | ← Benzodiazepines (24h) | -0.04 | 0.42 | -0.08 | .932              | -0.85               | 0.78                | 0.00    |
| ETE       | ← Inhalants (24h)       | -0.60 | 0.32 | -1.89 | .059 <sup>†</sup> | -1.22               | 0.02                | -0.06   |
| ETE       | ← Narcotics (24h)       | 0.44  | 0.55 | 0.79  | .432              | -0.65               | 1.52                | 0.03    |
| ETE       | ← Others (24h)          | 0.64  | 0.30 | 2.15  | .032*             | 0.06                | 1.23                | 0.06    |
| ETE       | ← Gender_1              | 0.03  | 0.41 | 0.07  | .945              | -0.78               | 0.84                | 0.01    |
| ETE       | ← Gender_2              | -0.04 | 0.41 | -0.11 | .915              | -0.85               | 0.77                | -0.01   |
| ETE       | ← Education_1           | 0.53  | 0.26 | 2.05  | .040*             | 0.02                | 1.04                | 0.07    |
| ETE       | ← Education_2           | 0.21  | 0.18 | 1.16  | .245              | -0.14               | 0.56                | 0.04    |
| ETE       | ← Education_3           | -0.13 | 0.19 | -0.65 | .513              | -0.51               | 0.25                | -0.02   |
| ETE       | ← Education_4           | 0.04  | 0.16 | 0.26  | .797              | -0.27               | 0.35                | 0.01    |
| ETE       | ← Age                   | 0.00  | 0.01 | 0.08  | .935              | -0.01               | 0.01                | 0.00    |
| ETE       | ← Religion              | 0.14  | 0.03 | 4.21  | <.001***          | 0.08                | 0.21                | 0.12    |
| ETE       | ← Conservatism          | -0.11 | 0.05 | -2.40 | .016*             | -0.21               | -0.02               | -0.07   |

Note. Enter notes. \*\*\* =  $p < .001$ , \*\* =  $p < .01$ , \* =  $p < .05$ , <sup>†</sup> =  $p < .10$

Table 26

*Prediction of epistemically transformative experiences, controlling for expectations and desires (24h only)*

| Criterion | Predictor               | b     | SE   | z     | p                 | $CI_{lower}^{95\%}$ | $CI_{upper}^{95\%}$ | $\beta$ |
|-----------|-------------------------|-------|------|-------|-------------------|---------------------|---------------------|---------|
| ETE       | ← TE_Desire             | 0.18  | 0.04 | 4.97  | <.001***          | 0.11                | 0.24                | 0.18    |
| ETE       | ← TE_Expect             | 0.10  | 0.04 | 2.74  | .006**            | 0.03                | 0.18                | 0.10    |
| ETE       | ← Psychedelics (24h)    | 0.45  | 0.15 | 2.99  | .003**            | 0.16                | 0.75                | 0.09    |
| ETE       | ← Nicotine (24h)        | 0.10  | 0.12 | 0.81  | .417              | -0.14               | 0.34                | 0.02    |
| ETE       | ← Alcohol (24h)         | -0.59 | 0.12 | -4.85 | <.001***          | -0.83               | -0.35               | -0.14   |
| ETE       | ← Stimulants (24h)      | 0.24  | 0.18 | 1.36  | .175              | -0.11               | 0.58                | 0.04    |
| ETE       | ← Euphorics (24h)       | 0.14  | 0.17 | 0.80  | .423              | -0.20               | 0.47                | 0.02    |
| ETE       | ← Cannabinoids (24h)    | 0.29  | 0.12 | 2.39  | .017*             | 0.05                | 0.53                | 0.07    |
| ETE       | ← Benzodiazepines (24h) | -0.13 | 0.40 | -0.32 | .747              | -0.92               | 0.66                | -0.01   |
| ETE       | ← Inhalants (24h)       | -0.61 | 0.31 | -1.97 | .048*             | -1.21               | 0.00                | -0.06   |
| ETE       | ← Narcotics (24h)       | 0.41  | 0.54 | 0.77  | .444              | -0.64               | 1.46                | 0.03    |
| ETE       | ← Others (24h)          | 0.69  | 0.29 | 2.37  | .018*             | 0.12                | 1.25                | 0.07    |
| ETE       | ← Gender_1              | 0.17  | 0.40 | 0.43  | .669              | -0.61               | 0.96                | 0.04    |
| ETE       | ← Gender_2              | 0.10  | 0.40 | 0.25  | .800              | -0.68               | 0.88                | 0.03    |
| ETE       | ← Education_1           | 0.60  | 0.25 | 2.38  | .017*             | 0.11                | 1.09                | 0.07    |
| ETE       | ← Education_2           | 0.31  | 0.17 | 1.78  | .074 <sup>†</sup> | -0.03               | 0.65                | 0.07    |
| ETE       | ← Education_3           | 0.01  | 0.19 | 0.08  | .939              | -0.35               | 0.38                | 0.00    |
| ETE       | ← Education_4           | 0.14  | 0.15 | 0.96  | .339              | -0.15               | 0.44                | 0.04    |
| ETE       | ← Age                   | 0.01  | 0.01 | 1.30  | .195              | 0.00                | 0.02                | 0.04    |
| ETE       | ← Religion              | 0.10  | 0.03 | 3.12  | .002**            | 0.04                | 0.17                | 0.09    |
| ETE       | ← Conservatism          | -0.09 | 0.05 | -1.87 | .061 <sup>†</sup> | -0.18               | 0.00                | -0.05   |

Note. Enter notes. \*\*\* =  $p < .001$ , \*\* =  $p < .01$ , \* =  $p < .05$ , <sup>†</sup> =  $p < .10$

Table 27

*Prediction of social connectedness (24h only)*

| Criterion   | Predictor               | b     | SE   | z     | p                 | $CI_{lower}^{95\%}$ | $CI_{upper}^{95\%}$ | $\beta$ |
|-------------|-------------------------|-------|------|-------|-------------------|---------------------|---------------------|---------|
| Social Con. | ← Psychedelics (24h)    | 0.33  | 0.13 | 2.54  | .011*             | 0.08                | 0.58                | 0.08    |
| Social Con. | ← Nicotine (24h)        | 0.18  | 0.11 | 1.65  | .099 <sup>†</sup> | -0.03               | 0.38                | 0.05    |
| Social Con. | ← Alcohol (24h)         | -0.04 | 0.10 | -0.35 | .728              | -0.24               | 0.17                | -0.01   |
| Social Con. | ← Stimulants (24h)      | 0.06  | 0.15 | 0.39  | .695              | -0.24               | 0.35                | 0.01    |
| Social Con. | ← Euphorics (24h)       | 0.03  | 0.14 | 0.19  | .847              | -0.26               | 0.31                | 0.01    |
| Social Con. | ← Cannabinoids (24h)    | 0.07  | 0.10 | 0.65  | .518              | -0.14               | 0.27                | 0.02    |
| Social Con. | ← Benzodiazepines (24h) | -0.21 | 0.34 | -0.62 | .536              | -0.89               | 0.46                | -0.02   |
| Social Con. | ← Inhalants (24h)       | 0.32  | 0.26 | 1.22  | .224              | -0.19               | 0.82                | 0.04    |
| Social Con. | ← Narcotics (24h)       | 0.06  | 0.46 | 0.13  | .893              | -0.84               | 0.96                | 0.00    |
| Social Con. | ← Others (24h)          | -0.03 | 0.25 | -0.13 | .898              | -0.51               | 0.45                | 0.00    |
| Social Con. | ← Gender_1              | -0.36 | 0.36 | -1.01 | .310              | -1.06               | 0.34                | -0.12   |
| Social Con. | ← Gender_2              | -0.08 | 0.36 | -0.24 | .813              | -0.79               | 0.62                | -0.03   |
| Social Con. | ← Education_1           | -0.10 | 0.21 | -0.47 | .635              | -0.52               | 0.32                | -0.02   |
| Social Con. | ← Education_2           | -0.11 | 0.15 | -0.74 | .457              | -0.39               | 0.18                | -0.03   |
| Social Con. | ← Education_3           | -0.01 | 0.16 | -0.07 | .944              | -0.32               | 0.30                | 0.00    |
| Social Con. | ← Education_4           | -0.18 | 0.13 | -1.40 | .160              | -0.43               | 0.07                | -0.06   |
| Social Con. | ← Age                   | 0.01  | 0.00 | 2.04  | .042*             | 0.00                | 0.02                | 0.07    |
| Social Con. | ← Religion              | 0.09  | 0.03 | 3.03  | .002**            | 0.03                | 0.14                | 0.09    |
| Social Con. | ← Conservatism          | 0.02  | 0.04 | 0.61  | .543              | -0.05               | 0.10                | 0.02    |

Note. Enter notes. \*\*\* =  $p < .001$ , \*\* =  $p < .01$ , \* =  $p < .05$ , <sup>†</sup> =  $p < .10$

Table 28

*Prediction of mood (24h only)*

| Criterion | Predictor               | b     | SE   | z     | p                 | $CI_{lower}^{95\%}$ | $CI_{upper}^{95\%}$ | $\beta$ |
|-----------|-------------------------|-------|------|-------|-------------------|---------------------|---------------------|---------|
| Mood      | ← Psychedelics (24h)    | 0.22  | 0.06 | 3.43  | <.001***          | 0.10                | 0.35                | 0.11    |
| Mood      | ← Nicotine (24h)        | 0.04  | 0.05 | 0.78  | .433              | -0.06               | 0.15                | 0.02    |
| Mood      | ← Alcohol (24h)         | -0.08 | 0.05 | -1.56 | .118              | -0.18               | 0.02                | -0.05   |
| Mood      | ← Stimulants (24h)      | 0.10  | 0.07 | 1.37  | .170              | -0.04               | 0.25                | 0.04    |
| Mood      | ← Euphorics (24h)       | 0.04  | 0.07 | 0.56  | .576              | -0.10               | 0.18                | 0.02    |
| Mood      | ← Cannabinoids (24h)    | 0.08  | 0.05 | 1.46  | .144              | -0.03               | 0.18                | 0.05    |
| Mood      | ← Benzodiazepines (24h) | -0.17 | 0.17 | -1.00 | .316              | -0.51               | 0.17                | -0.04   |
| Mood      | ← Inhalants (24h)       | -0.15 | 0.13 | -1.17 | .241              | -0.41               | 0.10                | -0.04   |
| Mood      | ← Narcotics (24h)       | -0.02 | 0.23 | -0.10 | .918              | -0.48               | 0.43                | 0.00    |
| Mood      | ← Others (24h)          | -0.14 | 0.12 | -1.13 | .257              | -0.38               | 0.10                | -0.03   |
| Mood      | ← Gender_1              | 0.16  | 0.18 | 0.89  | .376              | -0.19               | 0.51                | 0.10    |
| Mood      | ← Gender_2              | 0.21  | 0.18 | 1.20  | .230              | -0.14               | 0.56                | 0.14    |
| Mood      | ← Education_1           | 0.02  | 0.11 | 0.17  | .865              | -0.19               | 0.23                | 0.01    |
| Mood      | ← Education_2           | -0.13 | 0.07 | -1.74 | .082 <sup>†</sup> | -0.27               | 0.02                | -0.07   |
| Mood      | ← Education_3           | -0.15 | 0.08 | -1.84 | .065 <sup>†</sup> | -0.30               | 0.01                | -0.06   |
| Mood      | ← Education_4           | -0.13 | 0.06 | -2.10 | .036*             | -0.26               | -0.01               | -0.08   |
| Mood      | ← Age                   | 0.01  | 0.00 | 2.59  | .010**            | 0.00                | 0.01                | 0.08    |
| Mood      | ← Religion              | 0.01  | 0.01 | 0.67  | .501              | -0.02               | 0.04                | 0.02    |
| Mood      | ← Conservatism          | -0.02 | 0.02 | -0.80 | .421              | -0.05               | 0.02                | -0.02   |

*Note.* Enter notes. \*\*\* =  $p < .001$ , \*\* =  $p < .01$ , \* =  $p < .05$ , <sup>†</sup> =  $p < .10$

**Mediation analyses (24h use only)**

The following tables show results of the mediation analyses reported in the paper, only including very recent use (in the last 24 hours) of substances from each substance class.

Table 29

*Prediction of mood via self-reported transformative experiences (24h only)*

| Criterion | Predictor               | b     | SE   | z     | p        | $CI_{lower}^{95\%}$ | $CI_{upper}^{95\%}$ | $\beta$ |
|-----------|-------------------------|-------|------|-------|----------|---------------------|---------------------|---------|
| TE        | ← TE_Desire             | 0.24  | 0.04 | 6.53  | <.001*** | 0.16                | 0.31                | 0.24    |
| TE        | ← TE_Expect             | 0.16  | 0.04 | 4.21  | <.001*** | 0.09                | 0.24                | 0.15    |
| TE        | ← Psychedelics (24h)    | 0.76  | 0.15 | 4.96  | <.001*** | 0.46                | 1.05                | 0.14    |
| TE        | ← Nicotine (24h)        | 0.32  | 0.12 | 2.60  | .009**   | 0.08                | 0.57                | 0.07    |
| TE        | ← Alcohol (24h)         | -0.43 | 0.12 | -3.53 | <.001*** | -0.66               | -0.19               | -0.10   |
| TE        | ← Stimulants (24h)      | 0.28  | 0.18 | 1.60  | .110     | -0.06               | 0.63                | 0.05    |
| TE        | ← Euphorics (24h)       | 0.30  | 0.17 | 1.77  | .076†    | -0.03               | 0.63                | 0.05    |
| TE        | ← Cannabinoids (24h)    | 0.14  | 0.12 | 1.14  | .256     | -0.10               | 0.38                | 0.03    |
| TE        | ← Benzodiazepines (24h) | -0.27 | 0.40 | -0.68 | .498     | -1.06               | 0.52                | -0.02   |
| TE        | ← Inhalants (24h)       | -0.68 | 0.30 | -2.24 | .025*    | -1.28               | -0.09               | -0.06   |
| TE        | ← Narcotics (24h)       | -0.20 | 0.54 | -0.36 | .717     | -1.25               | 0.86                | -0.01   |
| TE        | ← Others (24h)          | 0.39  | 0.29 | 1.37  | .172     | -0.17               | 0.96                | 0.04    |
| TE        | ← Gender_1              | 0.10  | 0.40 | 0.24  | .810     | -0.69               | 0.88                | 0.02    |
| TE        | ← Gender_2              | 0.19  | 0.40 | 0.47  | .636     | -0.60               | 0.97                | 0.05    |
| TE        | ← Education_1           | 0.21  | 0.25 | 0.84  | .403     | -0.28               | 0.70                | 0.02    |
| TE        | ← Education_2           | 0.44  | 0.17 | 2.54  | .011*    | 0.10                | 0.77                | 0.09    |
| TE        | ← Education_3           | -0.27 | 0.19 | -1.46 | .145     | -0.64               | 0.09                | -0.05   |
| TE        | ← Education_4           | 0.16  | 0.15 | 1.04  | .296     | -0.14               | 0.45                | 0.04    |
| TE        | ← Age                   | 0.01  | 0.01 | 1.94  | .052†    | 0.00                | 0.02                | 0.06    |
| TE        | ← Religion              | 0.09  | 0.03 | 2.82  | .005**   | 0.03                | 0.16                | 0.07    |
| TE        | ← Conservatism          | -0.06 | 0.05 | -1.23 | .218     | -0.15               | 0.03                | -0.03   |
| Mood      | ← TE                    | 0.08  | 0.01 | 6.84  | <.001*** | 0.06                | 0.10                | 0.20    |
| Mood      | ← Psychedelics (24h)    | 0.15  | 0.06 | 2.39  | .017*    | 0.03                | 0.28                | 0.08    |

|          |    |                       |       |      |       |          |       |       |       |
|----------|----|-----------------------|-------|------|-------|----------|-------|-------|-------|
| Mood     | ←  | Nicotine (24h)        | 0.02  | 0.05 | 0.37  | .712     | -0.08 | 0.12  | 0.01  |
| Mood     | ←  | Alcohol (24h)         | -0.04 | 0.05 | -0.79 | .432     | -0.14 | 0.06  | -0.02 |
| Mood     | ←  | Stimulants (24h)      | 0.08  | 0.07 | 1.03  | .305     | -0.07 | 0.22  | 0.03  |
| Mood     | ←  | Euphorics (24h)       | 0.02  | 0.07 | 0.23  | .820     | -0.12 | 0.15  | 0.01  |
| Mood     | ←  | Cannabinoids (24h)    | 0.05  | 0.05 | 0.94  | .346     | -0.05 | 0.15  | 0.03  |
| Mood     | ←  | Benzodiazepines (24h) | -0.16 | 0.17 | -0.93 | .350     | -0.49 | 0.17  | -0.03 |
| Mood     | ←  | Inhalants (24h)       | -0.10 | 0.13 | -0.77 | .442     | -0.35 | 0.15  | -0.02 |
| Mood     | ←  | Narcotics (24h)       | 0.00  | 0.23 | 0.00  | .999     | -0.45 | 0.45  | 0.00  |
| Mood     | ←  | Others (24h)          | -0.17 | 0.12 | -1.40 | .162     | -0.41 | 0.07  | -0.04 |
| Mood     | ←  | Gender_1              | 0.15  | 0.18 | 0.87  | .386     | -0.19 | 0.50  | 0.10  |
| Mood     | ←  | Gender_2              | 0.20  | 0.18 | 1.16  | .247     | -0.14 | 0.55  | 0.13  |
| Mood     | ←  | Education_1           | 0.01  | 0.10 | 0.05  | .959     | -0.20 | 0.21  | 0.00  |
| Mood     | ←  | Education_2           | -0.15 | 0.07 | -2.10 | .036*    | -0.29 | -0.01 | -0.08 |
| Mood     | ←  | Education_3           | -0.11 | 0.08 | -1.44 | .151     | -0.26 | 0.04  | -0.05 |
| Mood     | ←  | Education_4           | -0.14 | 0.06 | -2.17 | .030*    | -0.26 | -0.01 | -0.08 |
| Mood     | ←  | Age                   | 0.01  | 0.00 | 2.64  | .008**   | 0.00  | 0.01  | 0.08  |
| Mood     | ←  | Religion              | 0.00  | 0.01 | -0.10 | .918     | -0.03 | 0.03  | 0.00  |
| Mood     | ←  | Conservatism          | -0.01 | 0.02 | -0.44 | .660     | -0.05 | 0.03  | -0.01 |
| Direct   | on | Mood                  | 0.15  | 0.06 | 2.39  | .017*    | 0.03  | 0.28  | 0.08  |
| Indirect | on | Mood                  | 0.06  | 0.01 | 4.02  | <.001*** | 0.03  | 0.09  | 0.03  |
| Total    | on | Mood                  | 0.21  | 0.06 | 3.28  | .001**   | 0.09  | 0.34  | 0.11  |

*Note.* Indirect, direct, and total effects represent effects of psychedelic substance use on mood via self-reported transformative experiences (24h only) \*\*\* =  $p < .001$ , \*\* =  $p < .01$ , \* =  $p < .05$ , † =  $p < .10$

Table 30

*Prediction of mood via social connectedness (24h only)*

| Criterion   | Predictor               | b     | SE   | z     | p                 | $CI_{lower}^{95\%}$ | $CI_{upper}^{95\%}$ | $\beta$ |
|-------------|-------------------------|-------|------|-------|-------------------|---------------------|---------------------|---------|
| Social Con. | ← Psychedelics (24h)    | 0.33  | 0.13 | 2.52  | .012*             | 0.07                | 0.58                | 0.08    |
| Social Con. | ← Nicotine (24h)        | 0.18  | 0.11 | 1.65  | .099 <sup>†</sup> | -0.03               | 0.38                | 0.05    |
| Social Con. | ← Alcohol (24h)         | -0.04 | 0.10 | -0.38 | .702              | -0.24               | 0.16                | -0.01   |
| Social Con. | ← Stimulants (24h)      | 0.06  | 0.15 | 0.42  | .677              | -0.23               | 0.36                | 0.01    |
| Social Con. | ← Euphorics (24h)       | 0.03  | 0.14 | 0.23  | .819              | -0.25               | 0.32                | 0.01    |
| Social Con. | ← Cannabinoids (24h)    | 0.07  | 0.10 | 0.67  | .505              | -0.13               | 0.27                | 0.02    |
| Social Con. | ← Benzodiazepines (24h) | -0.21 | 0.34 | -0.62 | .533              | -0.89               | 0.46                | -0.02   |
| Social Con. | ← Inhalants (24h)       | 0.31  | 0.26 | 1.21  | .228              | -0.20               | 0.82                | 0.04    |
| Social Con. | ← Narcotics (24h)       | 0.06  | 0.46 | 0.13  | .893              | -0.84               | 0.96                | 0.00    |
| Social Con. | ← Others (24h)          | -0.03 | 0.25 | -0.14 | .888              | -0.52               | 0.45                | 0.00    |
| Social Con. | ← Gender_1              | -0.38 | 0.36 | -1.07 | .284              | -1.08               | 0.32                | -0.12   |
| Social Con. | ← Gender_2              | -0.11 | 0.36 | -0.30 | .765              | -0.81               | 0.59                | -0.03   |
| Social Con. | ← Education_1           | -0.10 | 0.21 | -0.46 | .648              | -0.51               | 0.32                | -0.01   |
| Social Con. | ← Education_2           | -0.11 | 0.15 | -0.75 | .452              | -0.40               | 0.18                | -0.03   |
| Social Con. | ← Education_3           | -0.01 | 0.16 | -0.07 | .943              | -0.32               | 0.30                | 0.00    |
| Social Con. | ← Education_4           | -0.18 | 0.13 | -1.40 | .163              | -0.43               | 0.07                | -0.06   |
| Social Con. | ← Age                   | 0.01  | 0.00 | 2.05  | .040*             | 0.00                | 0.02                | 0.07    |
| Social Con. | ← Religion              | 0.09  | 0.03 | 3.05  | .002**            | 0.03                | 0.14                | 0.09    |
| Social Con. | ← Conservatism          | 0.02  | 0.04 | 0.61  | .541              | -0.05               | 0.10                | 0.02    |
| Mood        | ← Social Con.           | 0.11  | 0.01 | 8.05  | <.001***          | 0.09                | 0.14                | 0.23    |
| Mood        | ← Psychedelics (24h)    | 0.18  | 0.06 | 2.89  | .004**            | 0.06                | 0.31                | 0.09    |
| Mood        | ← Nicotine (24h)        | 0.02  | 0.05 | 0.43  | .667              | -0.08               | 0.12                | 0.01    |
| Mood        | ← Alcohol (24h)         | -0.08 | 0.05 | -1.55 | .121              | -0.18               | 0.02                | -0.05   |

|          |    |                       |       |      |       |                      |       |      |       |
|----------|----|-----------------------|-------|------|-------|----------------------|-------|------|-------|
| Mood     | ←  | Stimulants (24h)      | 0.09  | 0.07 | 1.29  | .196                 | -0.05 | 0.24 | 0.04  |
| Mood     | ←  | Euphorics (24h)       | 0.04  | 0.07 | 0.51  | .608                 | -0.10 | 0.17 | 0.02  |
| Mood     | ←  | Cannabinoids (24h)    | 0.07  | 0.05 | 1.39  | .165                 | -0.03 | 0.17 | 0.04  |
| Mood     | ←  | Benzodiazepines (24h) | -0.14 | 0.17 | -0.85 | .393                 | -0.47 | 0.19 | -0.03 |
| Mood     | ←  | Inhalants (24h)       | -0.19 | 0.13 | -1.46 | .143                 | -0.43 | 0.06 | -0.05 |
| Mood     | ←  | Narcotics (24h)       | -0.02 | 0.23 | -0.08 | .934                 | -0.46 | 0.42 | 0.00  |
| Mood     | ←  | Others (24h)          | -0.14 | 0.12 | -1.17 | .242                 | -0.38 | 0.09 | -0.03 |
| Mood     | ←  | Gender_1              | 0.19  | 0.17 | 1.07  | .283                 | -0.16 | 0.53 | 0.12  |
| Mood     | ←  | Gender_2              | 0.21  | 0.17 | 1.21  | .225                 | -0.13 | 0.55 | 0.13  |
| Mood     | ←  | Education_1           | 0.03  | 0.10 | 0.27  | .788                 | -0.18 | 0.23 | 0.01  |
| Mood     | ←  | Education_2           | -0.12 | 0.07 | -1.65 | .098 <sup>†</sup>    | -0.26 | 0.02 | -0.06 |
| Mood     | ←  | Education_3           | -0.14 | 0.08 | -1.88 | .060 <sup>†</sup>    | -0.29 | 0.01 | -0.06 |
| Mood     | ←  | Education_4           | -0.12 | 0.06 | -1.85 | .064 <sup>†</sup>    | -0.24 | 0.01 | -0.07 |
| Mood     | ←  | Age                   | 0.00  | 0.00 | 2.14  | .032 <sup>*</sup>    | 0.00  | 0.01 | 0.07  |
| Mood     | ←  | Religion              | 0.00  | 0.01 | -0.06 | .949                 | -0.03 | 0.03 | 0.00  |
| Mood     | ←  | Conservatism          | -0.02 | 0.02 | -0.94 | .348                 | -0.06 | 0.02 | -0.03 |
| Indirect | on | Mood                  | 0.04  | 0.02 | 2.41  | .016 <sup>*</sup>    | 0.01  | 0.07 | 0.02  |
| Direct   | on | Mood                  | 0.18  | 0.06 | 2.89  | .004 <sup>**</sup>   | 0.06  | 0.31 | 0.09  |
| Total    | on | Mood                  | 0.22  | 0.06 | 3.40  | <.001 <sup>***</sup> | 0.09  | 0.35 | 0.11  |

*Note.* Indirect, direct, and total effects represent effects of psychedelic substance use on mood via social connectedness (24h only) \*\*\* =  $p < .001$ , \*\* =  $p < .01$ , \* =  $p < .05$ , † =  $p < .10$

### **Full structural equation model**

In the following, we will report the results for the full structural equation model found in the main document, including predictor variables representing both very recent (i.e., 24 hours) and moderately recent (i.e., the last week) use of each substance class.

Table 31

*Full structural equation model*

| Criterion | Predictor                | b     | SE   | z     | p      | $CI_{lower}^{95\%}$ | $CI_{upper}^{95\%}$ | $\beta$ |
|-----------|--------------------------|-------|------|-------|--------|---------------------|---------------------|---------|
| TE_Expect | ← Psychedelics (week)    | 0.04  | 0.23 | 0.18  | .857   | -0.41               | 0.49                | 0.01    |
| TE_Expect | ← Nicotine (week)        | 0.28  | 0.23 | 1.21  | .227   | -0.18               | 0.74                | 0.04    |
| TE_Expect | ← Alcohol (week)         | -0.36 | 0.17 | -2.06 | .039*  | -0.69               | -0.02               | -0.07   |
| TE_Expect | ← Stimulants (week)      | 0.23  | 0.24 | 0.95  | .341   | -0.24               | 0.69                | 0.03    |
| TE_Expect | ← Euphorics (week)       | 0.27  | 0.22 | 1.23  | .218   | -0.16               | 0.70                | 0.04    |
| TE_Expect | ← Cannabinoids (week)    | -0.04 | 0.18 | -0.24 | .812   | -0.40               | 0.31                | -0.01   |
| TE_Expect | ← Benzodiazepines (week) | 0.51  | 0.50 | 1.01  | .310   | -0.47               | 1.49                | 0.04    |
| TE_Expect | ← Inhalants (week)       | -0.12 | 0.33 | -0.36 | .722   | -0.77               | 0.54                | -0.01   |
| TE_Expect | ← Narcotics (week)       | -0.04 | 0.57 | -0.08 | .940   | -1.15               | 1.07                | 0.00    |
| TE_Expect | ← Others (week)          | -0.19 | 0.42 | -0.46 | .646   | -1.01               | 0.62                | -0.01   |
| TE_Expect | ← Psychedelics (24h)     | 0.36  | 0.16 | 2.24  | .025*  | 0.04                | 0.67                | 0.07    |
| TE_Expect | ← Nicotine (24h)         | -0.07 | 0.13 | -0.54 | .589   | -0.33               | 0.18                | -0.02   |
| TE_Expect | ← Alcohol (24h)          | -0.20 | 0.14 | -1.46 | .144   | -0.47               | 0.07                | -0.05   |
| TE_Expect | ← Stimulants (24h)       | 0.15  | 0.19 | 0.82  | .412   | -0.21               | 0.51                | 0.03    |
| TE_Expect | ← Euphorics (24h)        | 0.11  | 0.18 | 0.62  | .538   | -0.24               | 0.46                | 0.02    |
| TE_Expect | ← Cannabinoids (24h)     | 0.42  | 0.13 | 3.25  | .001** | 0.17                | 0.67                | 0.11    |
| TE_Expect | ← Benzodiazepines (24h)  | -0.10 | 0.41 | -0.24 | .810   | -0.91               | 0.71                | -0.01   |
| TE_Expect | ← Inhalants (24h)        | -0.05 | 0.32 | -0.15 | .882   | -0.67               | 0.58                | 0.00    |
| TE_Expect | ← Narcotics (24h)        | 0.56  | 0.56 | 1.00  | .316   | -0.54               | 1.66                | 0.04    |
| TE_Expect | ← Others (24h)           | -0.26 | 0.30 | -0.87 | .383   | -0.84               | 0.32                | -0.03   |
| TE_Expect | ← Gender_1               | -0.76 | 0.42 | -1.83 | .067†  | -1.58               | 0.05                | -0.20   |
| TE_Expect | ← Gender_2               | -0.79 | 0.41 | -1.90 | .058†  | -1.60               | 0.03                | -0.21   |
| TE_Expect | ← Education_1            | -0.28 | 0.26 | -1.10 | .271   | -0.79               | 0.22                | -0.04   |

|           |   |                        |       |      |       |          |       |       |       |
|-----------|---|------------------------|-------|------|-------|----------|-------|-------|-------|
| TE_Expect | ← | Education_2            | -0.23 | 0.18 | -1.30 | .194     | -0.58 | 0.12  | -0.05 |
| TE_Expect | ← | Education_3            | -0.44 | 0.20 | -2.22 | .026*    | -0.82 | -0.05 | -0.08 |
| TE_Expect | ← | Education_4            | -0.32 | 0.16 | -2.03 | .043*    | -0.62 | -0.01 | -0.08 |
| TE_Expect | ← | Age                    | -0.02 | 0.01 | -3.19 | .001**   | -0.03 | -0.01 | -0.10 |
| TE_Expect | ← | Religion               | 0.13  | 0.03 | 3.83  | <.001*** | 0.06  | 0.20  | 0.11  |
| TE_Expect | ← | Conservatism           | -0.04 | 0.05 | -0.84 | .400     | -0.14 | 0.05  | -0.03 |
| TE_Desire | ← | Psychedelics (week)    | 0.13  | 0.24 | 0.53  | .595     | -0.35 | 0.61  | 0.02  |
| TE_Desire | ← | Nicotine (week)        | 0.34  | 0.25 | 1.39  | .165     | -0.14 | 0.83  | 0.04  |
| TE_Desire | ← | Alcohol (week)         | -0.48 | 0.18 | -2.60 | .009**   | -0.84 | -0.12 | -0.08 |
| TE_Desire | ← | Stimulants (week)      | 0.01  | 0.25 | 0.03  | .978     | -0.49 | 0.50  | 0.00  |
| TE_Desire | ← | Euphorics (week)       | 0.48  | 0.23 | 2.05  | .040*    | 0.02  | 0.94  | 0.07  |
| TE_Desire | ← | Cannabinoids (week)    | 0.02  | 0.19 | 0.11  | .913     | -0.36 | 0.40  | 0.00  |
| TE_Desire | ← | Benzodiazepines (week) | 0.24  | 0.54 | 0.45  | .652     | -0.81 | 1.29  | 0.02  |
| TE_Desire | ← | Inhalants (week)       | 0.20  | 0.36 | 0.56  | .577     | -0.50 | 0.90  | 0.02  |
| TE_Desire | ← | Narcotics (week)       | -0.76 | 0.61 | -1.25 | .210     | -1.94 | 0.43  | -0.04 |
| TE_Desire | ← | Others (week)          | 0.33  | 0.44 | 0.75  | .454     | -0.54 | 1.20  | 0.02  |
| TE_Desire | ← | Psychedelics (24h)     | 0.34  | 0.17 | 1.99  | .047*    | 0.00  | 0.67  | 0.06  |
| TE_Desire | ← | Nicotine (24h)         | -0.12 | 0.14 | -0.88 | .381     | -0.39 | 0.15  | -0.03 |
| TE_Desire | ← | Alcohol (24h)          | -0.45 | 0.14 | -3.09 | .002**   | -0.73 | -0.16 | -0.10 |
| TE_Desire | ← | Stimulants (24h)       | 0.07  | 0.20 | 0.37  | .711     | -0.31 | 0.46  | 0.01  |
| TE_Desire | ← | Euphorics (24h)        | -0.01 | 0.19 | -0.07 | .942     | -0.39 | 0.36  | 0.00  |
| TE_Desire | ← | Cannabinoids (24h)     | 0.62  | 0.14 | 4.48  | <.001*** | 0.35  | 0.89  | 0.15  |
| TE_Desire | ← | Benzodiazepines (24h)  | 0.71  | 0.44 | 1.60  | .109     | -0.16 | 1.57  | 0.05  |
| TE_Desire | ← | Inhalants (24h)        | 0.19  | 0.34 | 0.56  | .574     | -0.48 | 0.86  | 0.02  |
| TE_Desire | ← | Narcotics (24h)        | -0.46 | 0.60 | -0.77 | .442     | -1.63 | 0.71  | -0.03 |
| TE_Desire | ← | Others (24h)           | -0.12 | 0.32 | -0.38 | .706     | -0.74 | 0.50  | -0.01 |
| TE_Desire | ← | Gender_1               | -0.37 | 0.45 | -0.83 | .408     | -1.25 | 0.51  | -0.09 |

|           |   |                        |       |      |       |          |       |       |       |
|-----------|---|------------------------|-------|------|-------|----------|-------|-------|-------|
| TE_Desire | ← | Gender_2               | -0.41 | 0.45 | -0.92 | .359     | -1.29 | 0.47  | -0.10 |
| TE_Desire | ← | Education_1            | -0.30 | 0.28 | -1.11 | .268     | -0.84 | 0.23  | -0.04 |
| TE_Desire | ← | Education_2            | -0.46 | 0.19 | -2.43 | .015*    | -0.84 | -0.09 | -0.09 |
| TE_Desire | ← | Education_3            | -0.54 | 0.21 | -2.56 | .011*    | -0.95 | -0.13 | -0.09 |
| TE_Desire | ← | Education_4            | -0.41 | 0.17 | -2.47 | .014*    | -0.74 | -0.09 | -0.10 |
| TE_Desire | ← | Age                    | -0.03 | 0.01 | -4.62 | <.001*** | -0.04 | -0.02 | -0.15 |
| TE_Desire | ← | Religion               | 0.16  | 0.04 | 4.47  | <.001*** | 0.09  | 0.23  | 0.13  |
| TE_Desire | ← | Conservatism           | -0.12 | 0.05 | -2.38 | .017*    | -0.22 | -0.02 | -0.07 |
| TE        | ← | TE_Expect              | 0.16  | 0.04 | 4.15  | <.001*** | 0.09  | 0.24  | 0.15  |
| TE        | ← | TE_Desire              | 0.23  | 0.04 | 6.44  | <.001*** | 0.16  | 0.30  | 0.23  |
| TE        | ← | Psychedelics (week)    | 0.31  | 0.22 | 1.41  | .159     | -0.12 | 0.75  | 0.04  |
| TE        | ← | Nicotine (week)        | -0.13 | 0.23 | -0.56 | .573     | -0.57 | 0.32  | -0.02 |
| TE        | ← | Alcohol (week)         | -0.21 | 0.17 | -1.25 | .210     | -0.53 | 0.12  | -0.04 |
| TE        | ← | Stimulants (week)      | 0.05  | 0.23 | 0.23  | .817     | -0.40 | 0.51  | 0.01  |
| TE        | ← | Euphorics (week)       | 0.09  | 0.21 | 0.43  | .665     | -0.33 | 0.51  | 0.01  |
| TE        | ← | Cannabinoids (week)    | -0.09 | 0.17 | -0.49 | .621     | -0.43 | 0.25  | -0.01 |
| TE        | ← | Benzodiazepines (week) | -0.06 | 0.49 | -0.12 | .905     | -1.02 | 0.91  | 0.00  |
| TE        | ← | Inhalants (week)       | 0.20  | 0.32 | 0.62  | .535     | -0.44 | 0.84  | 0.02  |
| TE        | ← | Narcotics (week)       | 0.32  | 0.56 | 0.58  | .565     | -0.77 | 1.41  | 0.02  |
| TE        | ← | Others (week)          | 0.10  | 0.41 | 0.24  | .809     | -0.70 | 0.90  | 0.01  |
| TE        | ← | Psychedelics (24h)     | 0.78  | 0.16 | 5.02  | <.001*** | 0.48  | 1.08  | 0.15  |
| TE        | ← | Nicotine (24h)         | 0.29  | 0.13 | 2.31  | .021*    | 0.04  | 0.54  | 0.06  |
| TE        | ← | Alcohol (24h)          | -0.48 | 0.13 | -3.64 | <.001*** | -0.74 | -0.22 | -0.11 |
| TE        | ← | Stimulants (24h)       | 0.28  | 0.18 | 1.57  | .117     | -0.07 | 0.63  | 0.05  |
| TE        | ← | Euphorics (24h)        | 0.33  | 0.17 | 1.89  | .059†    | -0.01 | 0.67  | 0.06  |
| TE        | ← | Cannabinoids (24h)     | 0.11  | 0.13 | 0.88  | .381     | -0.14 | 0.36  | 0.03  |
| TE        | ← | Benzodiazepines (24h)  | -0.29 | 0.41 | -0.70 | .481     | -1.08 | 0.51  | -0.02 |

|             |   |                        |       |      |       |                   |       |       |       |
|-------------|---|------------------------|-------|------|-------|-------------------|-------|-------|-------|
| TE          | ← | Inhalants (24h)        | -0.68 | 0.31 | -2.22 | .026*             | -1.28 | -0.08 | -0.06 |
| TE          | ← | Narcotics (24h)        | -0.18 | 0.54 | -0.33 | .740              | -1.24 | 0.88  | -0.01 |
| TE          | ← | Others (24h)           | 0.38  | 0.29 | 1.32  | .188              | -0.19 | 0.95  | 0.04  |
| TE          | ← | Gender_1               | 0.11  | 0.40 | 0.26  | .791              | -0.68 | 0.89  | 0.03  |
| TE          | ← | Gender_2               | 0.21  | 0.40 | 0.52  | .604              | -0.58 | 0.99  | 0.05  |
| TE          | ← | Education_1            | 0.19  | 0.25 | 0.74  | .456              | -0.30 | 0.68  | 0.02  |
| TE          | ← | Education_2            | 0.44  | 0.17 | 2.57  | .010*             | 0.11  | 0.78  | 0.09  |
| TE          | ← | Education_3            | -0.24 | 0.19 | -1.28 | .201              | -0.61 | 0.13  | -0.04 |
| TE          | ← | Education_4            | 0.17  | 0.15 | 1.11  | .268              | -0.13 | 0.46  | 0.04  |
| TE          | ← | Age                    | 0.01  | 0.01 | 1.91  | .056 <sup>†</sup> | 0.00  | 0.02  | 0.06  |
| TE          | ← | Religion               | 0.09  | 0.03 | 2.77  | .006**            | 0.03  | 0.16  | 0.07  |
| TE          | ← | Conservatism           | -0.06 | 0.05 | -1.26 | .209              | -0.15 | 0.03  | -0.03 |
| Social Con. | ← | TE                     | 0.11  | 0.02 | 4.83  | <.001***          | 0.07  | 0.15  | 0.14  |
| Social Con. | ← | Psychedelics (week)    | 0.28  | 0.19 | 1.47  | .140              | -0.09 | 0.65  | 0.05  |
| Social Con. | ← | Nicotine (week)        | -0.04 | 0.19 | -0.21 | .831              | -0.41 | 0.33  | -0.01 |
| Social Con. | ← | Alcohol (week)         | -0.34 | 0.14 | -2.42 | .015*             | -0.61 | -0.06 | -0.08 |
| Social Con. | ← | Stimulants (week)      | -0.07 | 0.19 | -0.35 | .724              | -0.45 | 0.31  | -0.01 |
| Social Con. | ← | Euphorics (week)       | 0.13  | 0.18 | 0.72  | .469              | -0.22 | 0.48  | 0.03  |
| Social Con. | ← | Cannabinoids (week)    | 0.30  | 0.15 | 2.05  | .040*             | 0.01  | 0.58  | 0.06  |
| Social Con. | ← | Benzodiazepines (week) | -0.09 | 0.41 | -0.22 | .830              | -0.90 | 0.72  | -0.01 |
| Social Con. | ← | Inhalants (week)       | -0.55 | 0.28 | -1.98 | .048*             | -1.09 | -0.01 | -0.06 |
| Social Con. | ← | Narcotics (week)       | 0.46  | 0.47 | 0.98  | .327              | -0.46 | 1.38  | 0.03  |
| Social Con. | ← | Others (week)          | -0.21 | 0.34 | -0.62 | .534              | -0.89 | 0.46  | -0.02 |
| Social Con. | ← | Psychedelics (24h)     | 0.24  | 0.13 | 1.80  | .073 <sup>†</sup> | -0.02 | 0.50  | 0.06  |
| Social Con. | ← | Nicotine (24h)         | 0.13  | 0.11 | 1.19  | .235              | -0.08 | 0.33  | 0.04  |
| Social Con. | ← | Alcohol (24h)          | -0.10 | 0.11 | -0.88 | .380              | -0.32 | 0.12  | -0.03 |
| Social Con. | ← | Stimulants (24h)       | -0.02 | 0.15 | -0.11 | .913              | -0.31 | 0.28  | 0.00  |

|             |   |                        |       |      |       |                   |       |      |       |
|-------------|---|------------------------|-------|------|-------|-------------------|-------|------|-------|
| Social Con. | ← | Euphorics (24h)        | 0.04  | 0.15 | 0.26  | .793              | -0.25 | 0.33 | 0.01  |
| Social Con. | ← | Cannabinoids (24h)     | 0.06  | 0.11 | 0.55  | .585              | -0.15 | 0.27 | 0.02  |
| Social Con. | ← | Benzodiazepines (24h)  | -0.15 | 0.34 | -0.43 | .665              | -0.82 | 0.52 | -0.01 |
| Social Con. | ← | Inhalants (24h)        | 0.43  | 0.26 | 1.66  | .096 <sup>†</sup> | -0.08 | 0.93 | 0.05  |
| Social Con. | ← | Narcotics (24h)        | 0.07  | 0.45 | 0.16  | .877              | -0.82 | 0.96 | 0.01  |
| Social Con. | ← | Others (24h)           | -0.04 | 0.24 | -0.16 | .875              | -0.51 | 0.44 | 0.00  |
| Social Con. | ← | Gender_1               | -0.27 | 0.35 | -0.78 | .438              | -0.96 | 0.42 | -0.09 |
| Social Con. | ← | Gender_2               | 0.00  | 0.35 | 0.00  | .997              | -0.69 | 0.69 | 0.00  |
| Social Con. | ← | Education_1            | -0.08 | 0.21 | -0.40 | .691              | -0.50 | 0.33 | -0.01 |
| Social Con. | ← | Education_2            | -0.10 | 0.14 | -0.69 | .493              | -0.38 | 0.18 | -0.03 |
| Social Con. | ← | Education_3            | 0.08  | 0.16 | 0.51  | .611              | -0.23 | 0.39 | 0.02  |
| Social Con. | ← | Education_4            | -0.14 | 0.13 | -1.09 | .274              | -0.39 | 0.11 | -0.04 |
| Social Con. | ← | Age                    | 0.01  | 0.00 | 2.15  | .032*             | 0.00  | 0.02 | 0.07  |
| Social Con. | ← | Religion               | 0.07  | 0.03 | 2.36  | .018*             | 0.01  | 0.12 | 0.07  |
| Social Con. | ← | Conservatism           | 0.03  | 0.04 | 0.80  | .423              | -0.05 | 0.11 | 0.02  |
| Mood        | ← | TE                     | 0.07  | 0.01 | 5.98  | <.001***          | 0.04  | 0.09 | 0.18  |
| Mood        | ← | Social Con.            | 0.10  | 0.01 | 7.40  | <.001***          | 0.08  | 0.13 | 0.21  |
| Mood        | ← | Psychedelics (week)    | -0.10 | 0.09 | -1.13 | .257              | -0.28 | 0.08 | -0.04 |
| Mood        | ← | Nicotine (week)        | 0.10  | 0.09 | 1.06  | .287              | -0.08 | 0.28 | 0.03  |
| Mood        | ← | Alcohol (week)         | -0.03 | 0.07 | -0.41 | .682              | -0.16 | 0.10 | -0.01 |
| Mood        | ← | Stimulants (week)      | 0.05  | 0.09 | 0.55  | .581              | -0.13 | 0.24 | 0.02  |
| Mood        | ← | Euphorics (week)       | -0.10 | 0.09 | -1.17 | .243              | -0.27 | 0.07 | -0.04 |
| Mood        | ← | Cannabinoids (week)    | 0.01  | 0.07 | 0.17  | .868              | -0.13 | 0.15 | 0.01  |
| Mood        | ← | Benzodiazepines (week) | -0.16 | 0.20 | -0.78 | .438              | -0.55 | 0.24 | -0.03 |
| Mood        | ← | Inhalants (week)       | 0.17  | 0.13 | 1.30  | .192              | -0.09 | 0.43 | 0.04  |
| Mood        | ← | Narcotics (week)       | -0.17 | 0.23 | -0.77 | .441              | -0.62 | 0.27 | -0.03 |
| Mood        | ← | Others (week)          | 0.01  | 0.17 | 0.06  | .949              | -0.32 | 0.34 | 0.00  |

|          |    |                       |       |      |       |                   |       |       |       |
|----------|----|-----------------------|-------|------|-------|-------------------|-------|-------|-------|
| Mood     | ←  | Psychedelics (24h)    | 0.12  | 0.06 | 1.83  | .067 <sup>†</sup> | -0.01 | 0.24  | 0.06  |
| Mood     | ←  | Nicotine (24h)        | 0.02  | 0.05 | 0.33  | .743              | -0.08 | 0.12  | 0.01  |
| Mood     | ←  | Alcohol (24h)         | -0.06 | 0.05 | -1.02 | .307              | -0.16 | 0.05  | -0.03 |
| Mood     | ←  | Stimulants (24h)      | 0.09  | 0.07 | 1.17  | .242              | -0.06 | 0.23  | 0.04  |
| Mood     | ←  | Euphorics (24h)       | -0.01 | 0.07 | -0.18 | .855              | -0.15 | 0.13  | -0.01 |
| Mood     | ←  | Cannabinoids (24h)    | 0.06  | 0.05 | 1.25  | .213              | -0.04 | 0.17  | 0.04  |
| Mood     | ←  | Benzodiazepines (24h) | -0.15 | 0.17 | -0.92 | .360              | -0.48 | 0.17  | -0.03 |
| Mood     | ←  | Inhalants (24h)       | -0.11 | 0.13 | -0.87 | .386              | -0.36 | 0.14  | -0.03 |
| Mood     | ←  | Narcotics (24h)       | -0.02 | 0.22 | -0.07 | .945              | -0.45 | 0.42  | 0.00  |
| Mood     | ←  | Others (24h)          | -0.18 | 0.12 | -1.49 | .137              | -0.41 | 0.06  | -0.04 |
| Mood     | ←  | Gender_1              | 0.17  | 0.17 | 0.98  | .329              | -0.17 | 0.51  | 0.11  |
| Mood     | ←  | Gender_2              | 0.19  | 0.17 | 1.11  | .266              | -0.15 | 0.53  | 0.12  |
| Mood     | ←  | Education_1           | 0.00  | 0.10 | 0.02  | .987              | -0.20 | 0.20  | 0.00  |
| Mood     | ←  | Education_2           | -0.16 | 0.07 | -2.28 | .022*             | -0.30 | -0.02 | -0.09 |
| Mood     | ←  | Education_3           | -0.13 | 0.08 | -1.74 | .082 <sup>†</sup> | -0.28 | 0.02  | -0.06 |
| Mood     | ←  | Education_4           | -0.13 | 0.06 | -2.10 | .035*             | -0.25 | -0.01 | -0.08 |
| Mood     | ←  | Age                   | 0.00  | 0.00 | 2.27  | .023*             | 0.00  | 0.01  | 0.07  |
| Mood     | ←  | Religion              | -0.01 | 0.01 | -0.82 | .412              | -0.04 | 0.02  | -0.02 |
| Mood     | ←  | Conservatism          | -0.01 | 0.02 | -0.49 | .621              | -0.05 | 0.03  | -0.01 |
| Indirect | on | Mood via TE           | 0.05  | 0.01 | 3.85  | <.001***          | 0.03  | 0.08  | 0.03  |
| Indirect | on | Mood via Soc.Con.     | 0.02  | 0.01 | 1.75  | .081 <sup>†</sup> | 0.00  | 0.05  | 0.01  |
| Indirect | on | Mood via both         | 0.01  | 0.00 | 3.16  | .002**            | 0.00  | 0.01  | 0.00  |
| Indirect | on | Mood (all)            | 0.09  | 0.02 | 4.20  | <.001***          | 0.05  | 0.13  | 0.04  |
| Direct   | on | Mood                  | 0.12  | 0.06 | 1.83  | .067 <sup>†</sup> | -0.01 | 0.24  | 0.06  |
| Total    | on | Mood                  | 0.20  | 0.07 | 3.08  | .002**            | 0.07  | 0.33  | 0.10  |

*Note.* Enter notes. \*\*\* =  $p < .001$ , \*\* =  $p < .01$ , \* =  $p < .05$ , <sup>†</sup> =  $p < .10$

**Full structural equation model (regular sum scores only)**

The following table presents results for the full structural equation model with sum scores (i.e., the substance use indicators not differentiating between moderately and very recent use; see primary analysis above), instead of individual scores for very recent vs. moderately recent substance use.

Table 32

*Full structural equation model (sum scores)*

| Criterion |   | Predictor       | b     | SE   | z     | p                 | $CI_{lower}^{95\%}$ | $CI_{upper}^{95\%}$ | $\beta$ |
|-----------|---|-----------------|-------|------|-------|-------------------|---------------------|---------------------|---------|
| TE_Expect | ← | Psychedelics    | 0.30  | 0.15 | 2.05  | .040*             | 0.01                | 0.59                | 0.07    |
| TE_Expect | ← | Nicotine        | -0.02 | 0.13 | -0.14 | .887              | -0.26               | 0.23                | 0.00    |
| TE_Expect | ← | Alcohol         | -0.26 | 0.15 | -1.81 | .070 <sup>†</sup> | -0.55               | 0.02                | -0.05   |
| TE_Expect | ← | Stimulants      | 0.19  | 0.16 | 1.17  | .243              | -0.13               | 0.51                | 0.04    |
| TE_Expect | ← | Euphorics       | 0.13  | 0.15 | 0.85  | .395              | -0.17               | 0.43                | 0.03    |
| TE_Expect | ← | Cannabinoids    | 0.38  | 0.13 | 2.98  | .003**            | 0.13                | 0.62                | 0.10    |
| TE_Expect | ← | Benzodiazepines | 0.09  | 0.33 | 0.27  | .787              | -0.56               | 0.73                | 0.01    |
| TE_Expect | ← | Inhalants       | 0.00  | 0.24 | 0.01  | .992              | -0.48               | 0.48                | 0.00    |
| TE_Expect | ← | Narcotics       | 0.24  | 0.41 | 0.59  | .557              | -0.56               | 1.03                | 0.02    |
| TE_Expect | ← | Others          | -0.18 | 0.25 | -0.74 | .461              | -0.67               | 0.31                | -0.02   |
| TE_Expect | ← | Gender_1        | -0.69 | 0.42 | -1.66 | .096 <sup>†</sup> | -1.51               | 0.12                | -0.18   |
| TE_Expect | ← | Gender_2        | -0.72 | 0.42 | -1.73 | .084 <sup>†</sup> | -1.53               | 0.10                | -0.19   |
| TE_Expect | ← | Education_1     | -0.20 | 0.26 | -0.78 | .433              | -0.70               | 0.30                | -0.03   |
| TE_Expect | ← | Education_2     | -0.18 | 0.18 | -1.02 | .308              | -0.53               | 0.17                | -0.04   |
| TE_Expect | ← | Education_3     | -0.38 | 0.20 | -1.93 | .053 <sup>†</sup> | -0.76               | 0.01                | -0.07   |
| TE_Expect | ← | Education_4     | -0.27 | 0.16 | -1.73 | .084 <sup>†</sup> | -0.58               | 0.04                | -0.07   |
| TE_Expect | ← | Age             | -0.02 | 0.01 | -3.16 | .002**            | -0.03               | -0.01               | -0.10   |
| TE_Expect | ← | Religion        | 0.13  | 0.03 | 3.72  | <.001***          | 0.06                | 0.19                | 0.11    |
| TE_Expect | ← | Conservatism    | -0.03 | 0.05 | -0.72 | .472              | -0.13               | 0.06                | -0.02   |
| TE_Desire | ← | Psychedelics    | 0.32  | 0.16 | 2.01  | .044*             | 0.01                | 0.62                | 0.07    |
| TE_Desire | ← | Nicotine        | -0.07 | 0.13 | -0.49 | .622              | -0.33               | 0.20                | -0.02   |
| TE_Desire | ← | Alcohol         | -0.56 | 0.15 | -3.65 | <.001***          | -0.87               | -0.26               | -0.11   |
| TE_Desire | ← | Stimulants      | 0.07  | 0.17 | 0.43  | .667              | -0.26               | 0.41                | 0.01    |

|           |   |                 |       |      |       |                   |       |       |       |
|-----------|---|-----------------|-------|------|-------|-------------------|-------|-------|-------|
| TE_Desire | ← | Euphorics       | 0.13  | 0.16 | 0.82  | .415              | -0.19 | 0.46  | 0.03  |
| TE_Desire | ← | Cannabinoids    | 0.58  | 0.13 | 4.35  | <.001***          | 0.32  | 0.85  | 0.14  |
| TE_Desire | ← | Benzodiazepines | 0.46  | 0.35 | 1.32  | .187              | -0.22 | 1.15  | 0.05  |
| TE_Desire | ← | Inhalants       | 0.27  | 0.26 | 1.05  | .296              | -0.24 | 0.78  | 0.03  |
| TE_Desire | ← | Narcotics       | -0.63 | 0.43 | -1.46 | .143              | -1.48 | 0.21  | -0.05 |
| TE_Desire | ← | Others          | 0.08  | 0.27 | 0.29  | .773              | -0.45 | 0.60  | 0.01  |
| TE_Desire | ← | Gender_1        | -0.29 | 0.45 | -0.64 | .521              | -1.17 | 0.59  | -0.07 |
| TE_Desire | ← | Gender_2        | -0.32 | 0.45 | -0.72 | .474              | -1.20 | 0.56  | -0.08 |
| TE_Desire | ← | Education_1     | -0.21 | 0.27 | -0.77 | .441              | -0.75 | 0.33  | -0.02 |
| TE_Desire | ← | Education_2     | -0.41 | 0.19 | -2.15 | .031*             | -0.78 | -0.04 | -0.08 |
| TE_Desire | ← | Education_3     | -0.49 | 0.21 | -2.34 | .019*             | -0.90 | -0.08 | -0.08 |
| TE_Desire | ← | Education_4     | -0.37 | 0.17 | -2.21 | .027*             | -0.70 | -0.04 | -0.09 |
| TE_Desire | ← | Age             | -0.03 | 0.01 | -4.62 | <.001***          | -0.04 | -0.02 | -0.15 |
| TE_Desire | ← | Religion        | 0.16  | 0.04 | 4.32  | <.001***          | 0.09  | 0.23  | 0.12  |
| TE_Desire | ← | Conservatism    | -0.12 | 0.05 | -2.34 | .020*             | -0.22 | -0.02 | -0.07 |
| TE        | ← | TE_Expect       | 0.17  | 0.04 | 4.28  | <.001***          | 0.09  | 0.24  | 0.15  |
| TE        | ← | TE_Desire       | 0.23  | 0.04 | 6.24  | <.001***          | 0.16  | 0.30  | 0.23  |
| TE        | ← | Psychedelics    | 0.67  | 0.14 | 4.69  | <.001***          | 0.39  | 0.96  | 0.14  |
| TE        | ← | Nicotine        | 0.22  | 0.12 | 1.82  | .068 <sup>†</sup> | -0.02 | 0.46  | 0.05  |
| TE        | ← | Alcohol         | -0.52 | 0.14 | -3.70 | <.001***          | -0.80 | -0.25 | -0.10 |
| TE        | ← | Stimulants      | 0.22  | 0.16 | 1.39  | .165              | -0.09 | 0.52  | 0.04  |
| TE        | ← | Euphorics       | 0.19  | 0.15 | 1.24  | .215              | -0.11 | 0.48  | 0.04  |
| TE        | ← | Cannabinoids    | 0.07  | 0.12 | 0.60  | .551              | -0.17 | 0.31  | 0.02  |
| TE        | ← | Benzodiazepines | -0.03 | 0.32 | -0.10 | .918              | -0.67 | 0.60  | 0.00  |
| TE        | ← | Inhalants       | -0.30 | 0.24 | -1.28 | .201              | -0.76 | 0.16  | -0.04 |
| TE        | ← | Narcotics       | -0.08 | 0.40 | -0.21 | .833              | -0.86 | 0.69  | -0.01 |
| TE        | ← | Others          | 0.28  | 0.24 | 1.14  | .252              | -0.20 | 0.76  | 0.03  |

|             |   |                 |       |      |       |          |       |      |       |
|-------------|---|-----------------|-------|------|-------|----------|-------|------|-------|
| TE          | ← | Gender_1        | 0.12  | 0.40 | 0.31  | .759     | -0.66 | 0.91 | 0.03  |
| TE          | ← | Gender_2        | 0.24  | 0.40 | 0.59  | .554     | -0.55 | 1.03 | 0.06  |
| TE          | ← | Education_1     | 0.24  | 0.25 | 0.96  | .337     | -0.25 | 0.73 | 0.03  |
| TE          | ← | Education_2     | 0.48  | 0.17 | 2.81  | .005**   | 0.15  | 0.82 | 0.10  |
| TE          | ← | Education_3     | -0.20 | 0.19 | -1.09 | .275     | -0.57 | 0.16 | -0.03 |
| TE          | ← | Education_4     | 0.19  | 0.15 | 1.28  | .201     | -0.10 | 0.49 | 0.05  |
| TE          | ← | Age             | 0.01  | 0.01 | 1.57  | .117     | 0.00  | 0.02 | 0.05  |
| TE          | ← | Religion        | 0.10  | 0.03 | 2.91  | .004**   | 0.03  | 0.16 | 0.08  |
| TE          | ← | Conservatism    | -0.06 | 0.05 | -1.34 | .181     | -0.15 | 0.03 | -0.04 |
| Social Con. | ← | TE              | 0.11  | 0.02 | 4.66  | <.001*** | 0.06  | 0.15 | 0.14  |
| Social Con. | ← | Psychedelics    | 0.27  | 0.12 | 2.18  | .030*    | 0.03  | 0.51 | 0.07  |
| Social Con. | ← | Nicotine        | 0.08  | 0.10 | 0.75  | .451     | -0.12 | 0.28 | 0.02  |
| Social Con. | ← | Alcohol         | -0.12 | 0.12 | -1.01 | .313     | -0.36 | 0.11 | -0.03 |
| Social Con. | ← | Stimulants      | -0.08 | 0.13 | -0.62 | .534     | -0.34 | 0.18 | -0.02 |
| Social Con. | ← | Euphorics       | 0.08  | 0.13 | 0.66  | .511     | -0.17 | 0.33 | 0.02  |
| Social Con. | ← | Cannabinoids    | 0.15  | 0.10 | 1.45  | .148     | -0.05 | 0.35 | 0.05  |
| Social Con. | ← | Benzodiazepines | -0.16 | 0.27 | -0.60 | .551     | -0.69 | 0.37 | -0.02 |
| Social Con. | ← | Inhalants       | -0.07 | 0.20 | -0.36 | .717     | -0.46 | 0.32 | -0.01 |
| Social Con. | ← | Narcotics       | 0.36  | 0.33 | 1.08  | .280     | -0.29 | 1.01 | 0.04  |
| Social Con. | ← | Others          | -0.09 | 0.20 | -0.44 | .657     | -0.49 | 0.31 | -0.01 |
| Social Con. | ← | Gender_1        | -0.34 | 0.35 | -0.95 | .340     | -1.02 | 0.35 | -0.11 |
| Social Con. | ← | Gender_2        | -0.06 | 0.35 | -0.17 | .864     | -0.75 | 0.63 | -0.02 |
| Social Con. | ← | Education_1     | -0.06 | 0.21 | -0.29 | .774     | -0.47 | 0.35 | -0.01 |
| Social Con. | ← | Education_2     | -0.11 | 0.14 | -0.79 | .428     | -0.40 | 0.17 | -0.03 |
| Social Con. | ← | Education_3     | 0.08  | 0.16 | 0.53  | .599     | -0.22 | 0.39 | 0.02  |
| Social Con. | ← | Education_4     | -0.17 | 0.13 | -1.32 | .186     | -0.42 | 0.08 | -0.05 |
| Social Con. | ← | Age             | 0.01  | 0.00 | 2.22  | .026*    | 0.00  | 0.02 | 0.07  |

|               |   |                 |       |      |       |                   |       |       |       |
|---------------|---|-----------------|-------|------|-------|-------------------|-------|-------|-------|
| Social Con.   | ← | Religion        | 0.06  | 0.03 | 2.29  | .022*             | 0.01  | 0.12  | 0.07  |
| Social Con.   | ← | Conservatism    | 0.04  | 0.04 | 0.95  | .340              | -0.04 | 0.11  | 0.03  |
| Mood          | ← | TE              | 0.07  | 0.01 | 6.24  | <.001***          | 0.05  | 0.09  | 0.18  |
| Mood          | ← | Social Con.     | 0.10  | 0.01 | 7.26  | <.001***          | 0.07  | 0.13  | 0.20  |
| Mood          | ← | Psychedelics    | 0.05  | 0.06 | 0.89  | .376              | -0.06 | 0.17  | 0.03  |
| Mood          | ← | Nicotine        | 0.04  | 0.05 | 0.79  | .429              | -0.06 | 0.14  | 0.02  |
| Mood          | ← | Alcohol         | -0.09 | 0.06 | -1.51 | .131              | -0.20 | 0.03  | -0.04 |
| Mood          | ← | Stimulants      | 0.09  | 0.06 | 1.43  | .152              | -0.03 | 0.22  | 0.05  |
| Mood          | ← | Euphorics       | -0.04 | 0.06 | -0.73 | .463              | -0.17 | 0.08  | -0.02 |
| Mood          | ← | Cannabinoids    | 0.03  | 0.05 | 0.63  | .531              | -0.07 | 0.13  | 0.02  |
| Mood          | ← | Benzodiazepines | -0.14 | 0.13 | -1.04 | .297              | -0.40 | 0.12  | -0.04 |
| Mood          | ← | Inhalants       | 0.04  | 0.10 | 0.43  | .667              | -0.15 | 0.23  | 0.01  |
| Mood          | ← | Narcotics       | -0.14 | 0.16 | -0.85 | .393              | -0.45 | 0.18  | -0.03 |
| Mood          | ← | Others          | -0.14 | 0.10 | -1.36 | .174              | -0.33 | 0.06  | -0.04 |
| Mood          | ← | Gender_1        | 0.18  | 0.17 | 1.05  | .294              | -0.16 | 0.52  | 0.11  |
| Mood          | ← | Gender_2        | 0.21  | 0.17 | 1.20  | .231              | -0.13 | 0.54  | 0.13  |
| Mood          | ← | Education_1     | 0.02  | 0.10 | 0.19  | .852              | -0.18 | 0.22  | 0.01  |
| Mood          | ← | Education_2     | -0.14 | 0.07 | -2.04 | .042*             | -0.28 | -0.01 | -0.08 |
| Mood          | ← | Education_3     | -0.12 | 0.08 | -1.55 | .122              | -0.27 | 0.03  | -0.05 |
| Mood          | ← | Education_4     | -0.11 | 0.06 | -1.79 | .074 <sup>†</sup> | -0.23 | 0.01  | -0.07 |
| Mood          | ← | Age             | 0.00  | 0.00 | 2.11  | .035*             | 0.00  | 0.01  | 0.07  |
| Mood          | ← | Religion        | -0.01 | 0.01 | -0.72 | .472              | -0.04 | 0.02  | -0.02 |
| Mood          | ← | Conservatism    | -0.01 | 0.02 | -0.56 | .573              | -0.05 | 0.03  | -0.02 |
| Social Fusion | ← | TE              | 0.16  | 0.02 | 9.75  | <.001***          | 0.13  | 0.20  | 0.30  |
| Social Fusion | ← | Social Con.     | 0.21  | 0.02 | 10.26 | <.001***          | 0.17  | 0.25  | 0.30  |
| Social Fusion | ← | Psychedelics    | 0.01  | 0.08 | 0.09  | .932              | -0.15 | 0.17  | 0.00  |
| Social Fusion | ← | Nicotine        | 0.03  | 0.07 | 0.43  | .668              | -0.11 | 0.18  | 0.01  |

|               |    |                   |       |      |       |          |       |       |       |
|---------------|----|-------------------|-------|------|-------|----------|-------|-------|-------|
| Social Fusion | ←  | Alcohol           | 0.03  | 0.09 | 0.41  | .681     | -0.13 | 0.20  | 0.01  |
| Social Fusion | ←  | Stimulants        | 0.21  | 0.09 | 2.32  | .020*    | 0.03  | 0.38  | 0.08  |
| Social Fusion | ←  | Euphorics         | -0.02 | 0.09 | -0.23 | .818     | -0.19 | 0.15  | -0.01 |
| Social Fusion | ←  | Cannabinoids      | -0.01 | 0.07 | -0.11 | .909     | -0.16 | 0.14  | 0.00  |
| Social Fusion | ←  | Benzodiazepines   | 0.07  | 0.19 | 0.37  | .712     | -0.30 | 0.44  | 0.01  |
| Social Fusion | ←  | Inhalants         | 0.15  | 0.14 | 1.13  | .260     | -0.11 | 0.42  | 0.04  |
| Social Fusion | ←  | Narcotics         | -0.52 | 0.24 | -2.18 | .029*    | -0.98 | -0.05 | -0.08 |
| Social Fusion | ←  | Others            | -0.27 | 0.14 | -1.98 | .047*    | -0.54 | 0.00  | -0.06 |
| Social Fusion | ←  | Gender_1          | -0.08 | 0.22 | -0.37 | .714     | -0.52 | 0.36  | -0.04 |
| Social Fusion | ←  | Gender_2          | -0.23 | 0.22 | -1.01 | .312     | -0.66 | 0.21  | -0.10 |
| Social Fusion | ←  | Education_1       | 0.16  | 0.14 | 1.15  | .251     | -0.12 | 0.45  | 0.04  |
| Social Fusion | ←  | Education_2       | 0.21  | 0.10 | 2.03  | .042*    | 0.01  | 0.42  | 0.08  |
| Social Fusion | ←  | Education_3       | 0.19  | 0.12 | 1.56  | .120     | -0.05 | 0.44  | 0.06  |
| Social Fusion | ←  | Education_4       | 0.19  | 0.09 | 2.14  | .033*    | 0.02  | 0.37  | 0.08  |
| Social Fusion | ←  | Age               | -0.01 | 0.00 | -1.49 | .136     | -0.01 | 0.00  | -0.06 |
| Social Fusion | ←  | Religion          | 0.01  | 0.02 | 0.51  | .608     | -0.03 | 0.05  | 0.02  |
| Social Fusion | ←  | Conservatism      | -0.02 | 0.03 | -0.59 | .557     | -0.07 | 0.04  | -0.02 |
| Indirect      | on | Mood via TE       | 0.05  | 0.01 | 3.75  | <.001*** | 0.02  | 0.07  | 0.03  |
| Indirect      | on | Mood via Soc.Con. | 0.03  | 0.01 | 2.09  | .037*    | 0.00  | 0.05  | 0.02  |
| Indirect      | on | Mood via both     | 0.01  | 0.00 | 3.02  | .003**   | 0.00  | 0.01  | 0.00  |
| Indirect      | on | Mood (all)        | 0.08  | 0.02 | 4.32  | <.001*** | 0.04  | 0.12  | 0.05  |
| Direct        | on | Mood              | 0.05  | 0.06 | 0.89  | .376     | -0.06 | 0.17  | 0.03  |
| Total         | on | Mood              | 0.13  | 0.06 | 2.20  | .028*    | 0.01  | 0.25  | 0.08  |
| Indirect      | on | SF via TE         | 0.11  | 0.03 | 4.22  | <.001*** | 0.06  | 0.16  | 0.04  |
| Indirect      | on | SF via Soc.Con.   | 0.06  | 0.03 | 2.13  | .033*    | 0.00  | 0.11  | 0.02  |
| Indirect      | on | SF via both       | 0.02  | 0.00 | 3.16  | .002**   | 0.01  | 0.02  | 0.01  |
| Indirect      | on | SF (all)          | 0.18  | 0.04 | 4.65  | <.001*** | 0.11  | 0.26  | 0.07  |

|        |    |    |      |      |      |       |       |      |      |
|--------|----|----|------|------|------|-------|-------|------|------|
| Direct | on | SF | 0.01 | 0.08 | 0.09 | .932  | -0.15 | 0.17 | 0.00 |
| Total  | on | SF | 0.19 | 0.09 | 2.12 | .034* | 0.01  | 0.36 | 0.08 |

---

*Note.* Enter notes. \*\*\* =  $p < .001$ , \*\* =  $p < .01$ , \* =  $p < .05$ , † =  $p < .10$

**Analyses excluding participants currently under residual influence of  
psychedelics**

The following tables show the main results (simple regressions, mediations, and SEM) presented in the main document excluding participants who reported being under the residual influence of psychedelic substances at the time of data collection).

Table 33

*Prediction of transformative experiences (excluding participants currently under influence of psychedelics)*

| Criterion | Predictor         | b     | SE   | z     | p                 | $CI_{lower}^{95\%}$ | $CI_{upper}^{95\%}$ | $\beta$ |
|-----------|-------------------|-------|------|-------|-------------------|---------------------|---------------------|---------|
| TE        | ← Psychedelics    | 0.81  | 0.16 | 5.09  | <.001***          | 0.50                | 1.12                | 0.17    |
| TE        | ← Nicotine        | 0.22  | 0.13 | 1.65  | .098 <sup>†</sup> | -0.04               | 0.48                | 0.05    |
| TE        | ← Alcohol         | -0.72 | 0.15 | -4.71 | <.001***          | -1.02               | -0.42               | -0.14   |
| TE        | ← Stimulants      | 0.21  | 0.17 | 1.23  | .217              | -0.12               | 0.55                | 0.04    |
| TE        | ← Euphorics       | 0.25  | 0.16 | 1.52  | .129              | -0.07               | 0.57                | 0.05    |
| TE        | ← Cannabinoids    | 0.29  | 0.13 | 2.18  | .029*             | 0.03                | 0.55                | 0.07    |
| TE        | ← Benzodiazepines | 0.12  | 0.35 | 0.33  | .741              | -0.58               | 0.81                | 0.01    |
| TE        | ← Inhalants       | -0.17 | 0.26 | -0.64 | .525              | -0.68               | 0.35                | -0.02   |
| TE        | ← Narcotics       | 0.07  | 0.45 | 0.15  | .881              | -0.81               | 0.95                | 0.00    |
| TE        | ← Others          | 0.34  | 0.27 | 1.24  | .214              | -0.20               | 0.88                | 0.04    |
| TE        | ← Gender_1        | -0.23 | 0.44 | -0.52 | .603              | -1.09               | 0.63                | -0.06   |
| TE        | ← Gender_2        | -0.09 | 0.44 | -0.21 | .834              | -0.95               | 0.77                | -0.02   |
| TE        | ← Education_1     | 0.11  | 0.27 | 0.42  | .673              | -0.42               | 0.65                | 0.01    |
| TE        | ← Education_2     | 0.34  | 0.19 | 1.86  | .063 <sup>†</sup> | -0.02               | 0.71                | 0.07    |
| TE        | ← Education_3     | -0.36 | 0.20 | -1.81 | .071 <sup>†</sup> | -0.76               | 0.03                | -0.06   |
| TE        | ← Education_4     | 0.07  | 0.16 | 0.46  | .645              | -0.24               | 0.39                | 0.02    |
| TE        | ← Age             | 0.00  | 0.01 | -0.08 | .935              | -0.01               | 0.01                | 0.00    |
| TE        | ← Religion        | 0.14  | 0.04 | 3.94  | <.001***          | 0.07                | 0.21                | 0.11    |
| TE        | ← Conservatism    | -0.11 | 0.05 | -2.15 | .032*             | -0.21               | -0.01               | -0.06   |

*Note.* Enter notes. \*\*\* =  $p < .001$ , \*\* =  $p < .01$ , \* =  $p < .05$ , <sup>†</sup> =  $p < .10$

Table 34

*Prediction of epistemically transformative experiences (excluding participants currently under influence of psychedelics)*

| Criterion | Predictor         | b     | SE   | z     | p        | $CI_{lower}^{95\%}$ | $CI_{upper}^{95\%}$ | $\beta$ |
|-----------|-------------------|-------|------|-------|----------|---------------------|---------------------|---------|
| ETE       | ← Psychedelics    | 0.39  | 0.15 | 2.57  | .010*    | 0.09                | 0.69                | 0.09    |
| ETE       | ← Nicotine        | 0.11  | 0.13 | 0.86  | .392     | -0.14               | 0.36                | 0.03    |
| ETE       | ← Alcohol         | -0.92 | 0.15 | -6.24 | <.001*** | -1.21               | -0.63               | -0.19   |
| ETE       | ← Stimulants      | 0.39  | 0.16 | 2.41  | .016*    | 0.07                | 0.72                | 0.08    |
| ETE       | ← Euphorics       | 0.19  | 0.16 | 1.18  | .238     | -0.12               | 0.49                | 0.04    |
| ETE       | ← Cannabinoids    | 0.27  | 0.13 | 2.11  | .035*    | 0.02                | 0.52                | 0.07    |
| ETE       | ← Benzodiazepines | -0.21 | 0.34 | -0.62 | .536     | -0.87               | 0.45                | -0.02   |
| ETE       | ← Inhalants       | -0.30 | 0.25 | -1.21 | .226     | -0.79               | 0.19                | -0.04   |
| ETE       | ← Narcotics       | 0.05  | 0.42 | 0.12  | .901     | -0.78               | 0.88                | 0.00    |
| ETE       | ← Others          | 0.73  | 0.26 | 2.79  | .005**   | 0.22                | 1.25                | 0.08    |
| ETE       | ← Gender_1        | -0.11 | 0.42 | -0.25 | .801     | -0.93               | 0.71                | -0.03   |
| ETE       | ← Gender_2        | -0.10 | 0.42 | -0.23 | .818     | -0.91               | 0.72                | -0.02   |
| ETE       | ← Education_1     | 0.35  | 0.26 | 1.35  | .178     | -0.16               | 0.87                | 0.04    |
| ETE       | ← Education_2     | 0.20  | 0.18 | 1.10  | .271     | -0.15               | 0.55                | 0.04    |
| ETE       | ← Education_3     | -0.07 | 0.19 | -0.36 | .719     | -0.45               | 0.31                | -0.01   |
| ETE       | ← Education_4     | 0.08  | 0.16 | 0.52  | .601     | -0.22               | 0.39                | 0.02    |
| ETE       | ← Age             | 0.00  | 0.01 | 0.00  | .998     | -0.01               | 0.01                | 0.00    |
| ETE       | ← Religion        | 0.13  | 0.03 | 3.77  | <.001*** | 0.06                | 0.20                | 0.11    |
| ETE       | ← Conservatism    | -0.12 | 0.05 | -2.53 | .011*    | -0.22               | -0.03               | -0.07   |

*Note.* Enter notes. \*\*\* =  $p < .001$ , \*\* =  $p < .01$ , \* =  $p < .05$ , † =  $p < .10$

Table 35

*Prediction of transformative experiences, controlling for expectations and desires (excluding participants currently under influence of psychedelics)*

| Criterion |   | Predictor       | b     | SE   | z     | p                 | $CI_{lower}^{95\%}$ | $CI_{upper}^{95\%}$ | $\beta$ |
|-----------|---|-----------------|-------|------|-------|-------------------|---------------------|---------------------|---------|
| TE        | ← | TE_Desire       | 0.22  | 0.04 | 6.05  | <.001***          | 0.15                | 0.30                | 0.22    |
| TE        | ← | TE_Expect       | 0.17  | 0.04 | 4.27  | <.001***          | 0.09                | 0.25                | 0.16    |
| TE        | ← | Psychedelics    | 0.68  | 0.15 | 4.50  | <.001***          | 0.38                | 0.97                | 0.14    |
| TE        | ← | Nicotine        | 0.22  | 0.12 | 1.79  | .074 <sup>†</sup> | -0.02               | 0.47                | 0.05    |
| TE        | ← | Alcohol         | -0.54 | 0.14 | -3.75 | <.001***          | -0.82               | -0.26               | -0.11   |
| TE        | ← | Stimulants      | 0.15  | 0.16 | 0.94  | .345              | -0.16               | 0.47                | 0.03    |
| TE        | ← | Euphorics       | 0.21  | 0.15 | 1.37  | .171              | -0.09               | 0.52                | 0.04    |
| TE        | ← | Cannabinoids    | 0.10  | 0.12 | 0.80  | .426              | -0.15               | 0.34                | 0.02    |
| TE        | ← | Benzodiazepines | 0.02  | 0.33 | 0.06  | .955              | -0.63               | 0.67                | 0.00    |
| TE        | ← | Inhalants       | -0.22 | 0.25 | -0.89 | .374              | -0.70               | 0.26                | -0.03   |
| TE        | ← | Narcotics       | 0.16  | 0.42 | 0.37  | .711              | -0.67               | 0.98                | 0.01    |
| TE        | ← | Others          | 0.33  | 0.26 | 1.27  | .204              | -0.18               | 0.83                | 0.03    |
| TE        | ← | Gender_1        | -0.03 | 0.41 | -0.06 | .949              | -0.83               | 0.78                | -0.01   |
| TE        | ← | Gender_2        | 0.11  | 0.41 | 0.26  | .798              | -0.70               | 0.91                | 0.03    |
| TE        | ← | Education_1     | 0.19  | 0.26 | 0.76  | .448              | -0.31               | 0.70                | 0.02    |
| TE        | ← | Education_2     | 0.46  | 0.17 | 2.63  | .009**            | 0.12                | 0.80                | 0.09    |
| TE        | ← | Education_3     | -0.20 | 0.19 | -1.04 | .299              | -0.57               | 0.17                | -0.03   |
| TE        | ← | Education_4     | 0.20  | 0.15 | 1.31  | .191              | -0.10               | 0.50                | 0.05    |
| TE        | ← | Age             | 0.01  | 0.01 | 1.67  | .095 <sup>†</sup> | 0.00                | 0.02                | 0.05    |
| TE        | ← | Religion        | 0.10  | 0.03 | 2.83  | .005**            | 0.03                | 0.16                | 0.08    |
| TE        | ← | Conservatism    | -0.08 | 0.05 | -1.65 | .100 <sup>†</sup> | -0.17               | 0.02                | -0.05   |

*Note.* Enter notes. \*\*\* =  $p < .001$ , \*\* =  $p < .01$ , \* =  $p < .05$ , <sup>†</sup> =  $p < .10$

Table 36

*Prediction of epistemically transformative experiences, controlling for expectations and desires (excluding participants currently under influence of psychedelics)*

| Criterion |   | Predictor       | b     | SE   | z     | p        | $CI_{lower}^{95\%}$ | $CI_{upper}^{95\%}$ | $\beta$ |
|-----------|---|-----------------|-------|------|-------|----------|---------------------|---------------------|---------|
| ETE       | ← | TE_Desire       | 0.16  | 0.04 | 4.57  | <.001*** | 0.09                | 0.23                | 0.17    |
| ETE       | ← | TE_Expect       | 0.11  | 0.04 | 2.81  | .005**   | 0.03                | 0.18                | 0.10    |
| ETE       | ← | Psychedelics    | 0.30  | 0.15 | 2.04  | .041*    | 0.01                | 0.59                | 0.07    |
| ETE       | ← | Nicotine        | 0.11  | 0.12 | 0.93  | .354     | -0.13               | 0.35                | 0.03    |
| ETE       | ← | Alcohol         | -0.81 | 0.14 | -5.63 | <.001*** | -1.09               | -0.53               | -0.17   |
| ETE       | ← | Stimulants      | 0.35  | 0.16 | 2.22  | .026*    | 0.04                | 0.66                | 0.07    |
| ETE       | ← | Euphorics       | 0.16  | 0.15 | 1.06  | .288     | -0.14               | 0.46                | 0.03    |
| ETE       | ← | Cannabinoids    | 0.13  | 0.12 | 1.07  | .285     | -0.11               | 0.38                | 0.03    |
| ETE       | ← | Benzodiazepines | -0.28 | 0.33 | -0.85 | .397     | -0.92               | 0.36                | -0.03   |
| ETE       | ← | Inhalants       | -0.34 | 0.24 | -1.38 | .166     | -0.81               | 0.14                | -0.04   |
| ETE       | ← | Narcotics       | 0.12  | 0.41 | 0.29  | .773     | -0.69               | 0.92                | 0.01    |
| ETE       | ← | Others          | 0.72  | 0.25 | 2.84  | .005**   | 0.22                | 1.22                | 0.08    |
| ETE       | ← | Gender_1        | 0.03  | 0.41 | 0.07  | .946     | -0.77               | 0.82                | 0.01    |
| ETE       | ← | Gender_2        | 0.03  | 0.41 | 0.07  | .948     | -0.77               | 0.82                | 0.01    |
| ETE       | ← | Education_1     | 0.40  | 0.25 | 1.58  | .113     | -0.10               | 0.90                | 0.05    |
| ETE       | ← | Education_2     | 0.28  | 0.17 | 1.61  | .107     | -0.06               | 0.62                | 0.06    |
| ETE       | ← | Education_3     | 0.04  | 0.19 | 0.24  | .813     | -0.32               | 0.41                | 0.01    |
| ETE       | ← | Education_4     | 0.17  | 0.15 | 1.11  | .267     | -0.13               | 0.47                | 0.04    |
| ETE       | ← | Age             | 0.01  | 0.01 | 1.19  | .235     | 0.00                | 0.02                | 0.04    |
| ETE       | ← | Religion        | 0.10  | 0.03 | 3.00  | .003**   | 0.04                | 0.17                | 0.08    |
| ETE       | ← | Conservatism    | -0.10 | 0.05 | -2.11 | .035*    | -0.19               | -0.01               | -0.06   |

*Note.* Enter notes. \*\*\* =  $p < .001$ , \*\* =  $p < .01$ , \* =  $p < .05$ , † =  $p < .10$

Table 37

*Prediction of social connectedness (excluding participants currently under influence of psychedelics)*

| Criterion   | Predictor         | b     | SE   | z     | p                 | $CI_{lower}^{95\%}$ | $CI_{upper}^{95\%}$ | $\beta$ |
|-------------|-------------------|-------|------|-------|-------------------|---------------------|---------------------|---------|
| Social Con. | ← Psychedelics    | 0.34  | 0.13 | 2.66  | .008**            | 0.09                | 0.59                | 0.09    |
| Social Con. | ← Nicotine        | 0.14  | 0.11 | 1.32  | .188              | -0.07               | 0.35                | 0.04    |
| Social Con. | ← Alcohol         | -0.22 | 0.12 | -1.82 | .068 <sup>†</sup> | -0.46               | 0.02                | -0.06   |
| Social Con. | ← Stimulants      | -0.10 | 0.14 | -0.76 | .446              | -0.37               | 0.16                | -0.03   |
| Social Con. | ← Euphorics       | 0.07  | 0.13 | 0.54  | .587              | -0.19               | 0.33                | 0.02    |
| Social Con. | ← Cannabinoids    | 0.17  | 0.11 | 1.64  | .101              | -0.03               | 0.38                | 0.06    |
| Social Con. | ← Benzodiazepines | -0.12 | 0.28 | -0.43 | .666              | -0.67               | 0.43                | -0.01   |
| Social Con. | ← Inhalants       | -0.02 | 0.21 | -0.08 | .934              | -0.42               | 0.39                | 0.00    |
| Social Con. | ← Narcotics       | 0.35  | 0.36 | 0.98  | .325              | -0.35               | 1.05                | 0.03    |
| Social Con. | ← Others          | -0.02 | 0.22 | -0.08 | .940              | -0.44               | 0.41                | 0.00    |
| Social Con. | ← Gender_1        | -0.29 | 0.36 | -0.79 | .430              | -1.00               | 0.43                | -0.09   |
| Social Con. | ← Gender_2        | 0.01  | 0.36 | 0.04  | .970              | -0.70               | 0.73                | 0.00    |
| Social Con. | ← Education_1     | -0.04 | 0.22 | -0.17 | .864              | -0.46               | 0.39                | -0.01   |
| Social Con. | ← Education_2     | -0.10 | 0.15 | -0.65 | .517              | -0.38               | 0.19                | -0.03   |
| Social Con. | ← Education_3     | 0.06  | 0.16 | 0.36  | .720              | -0.25               | 0.37                | 0.01    |
| Social Con. | ← Education_4     | -0.18 | 0.13 | -1.42 | .156              | -0.43               | 0.07                | -0.06   |
| Social Con. | ← Age             | 0.01  | 0.00 | 2.17  | .030*             | 0.00                | 0.02                | 0.07    |
| Social Con. | ← Religion        | 0.08  | 0.03 | 2.82  | .005**            | 0.02                | 0.14                | 0.08    |
| Social Con. | ← Conservatism    | 0.01  | 0.04 | 0.24  | .810              | -0.07               | 0.09                | 0.01    |

*Note.* Enter notes. \*\*\* =  $p < .001$ , \*\* =  $p < .01$ , \* =  $p < .05$ , <sup>†</sup> =  $p < .10$

Table 38

*Prediction of mood (excluding participants currently under influence of psychedelics)*

| Criterion | Predictor         | b     | SE   | z     | p                 | $CI_{lower}^{95\%}$ | $CI_{upper}^{95\%}$ | $\beta$ |
|-----------|-------------------|-------|------|-------|-------------------|---------------------|---------------------|---------|
| Mood      | ← Psychedelics    | 0.16  | 0.06 | 2.52  | .012*             | 0.04                | 0.28                | 0.09    |
| Mood      | ← Nicotine        | 0.06  | 0.05 | 1.20  | .232              | -0.04               | 0.17                | 0.04    |
| Mood      | ← Alcohol         | -0.15 | 0.06 | -2.41 | .016*             | -0.26               | -0.03               | -0.07   |
| Mood      | ← Stimulants      | 0.08  | 0.07 | 1.22  | .224              | -0.05               | 0.22                | 0.04    |
| Mood      | ← Euphorics       | -0.03 | 0.07 | -0.39 | .695              | -0.15               | 0.10                | -0.01   |
| Mood      | ← Cannabinoids    | 0.08  | 0.05 | 1.51  | .130              | -0.02               | 0.18                | 0.05    |
| Mood      | ← Benzodiazepines | -0.15 | 0.14 | -1.09 | .274              | -0.43               | 0.12                | -0.04   |
| Mood      | ← Inhalants       | 0.01  | 0.10 | 0.09  | .932              | -0.19               | 0.21                | 0.00    |
| Mood      | ← Narcotics       | -0.02 | 0.18 | -0.11 | .910              | -0.37               | 0.33                | 0.00    |
| Mood      | ← Others          | -0.03 | 0.11 | -0.31 | .755              | -0.25               | 0.18                | -0.01   |
| Mood      | ← Gender_1        | 0.22  | 0.18 | 1.19  | .234              | -0.14               | 0.58                | 0.14    |
| Mood      | ← Gender_2        | 0.29  | 0.18 | 1.58  | .114              | -0.07               | 0.65                | 0.18    |
| Mood      | ← Education_1     | 0.10  | 0.11 | 0.92  | .357              | -0.11               | 0.31                | 0.03    |
| Mood      | ← Education_2     | -0.10 | 0.07 | -1.42 | .156              | -0.25               | 0.04                | -0.06   |
| Mood      | ← Education_3     | -0.13 | 0.08 | -1.64 | .101              | -0.29               | 0.03                | -0.06   |
| Mood      | ← Education_4     | -0.12 | 0.06 | -1.92 | .055 <sup>†</sup> | -0.25               | 0.00                | -0.08   |
| Mood      | ← Age             | 0.01  | 0.00 | 2.25  | .024*             | 0.00                | 0.01                | 0.07    |
| Mood      | ← Religion        | 0.00  | 0.01 | 0.31  | .757              | -0.02               | 0.03                | 0.01    |
| Mood      | ← Conservatism    | -0.01 | 0.02 | -0.68 | .495              | -0.05               | 0.03                | -0.02   |

*Note.* Enter notes. \*\*\* =  $p < .001$ , \*\* =  $p < .01$ , \* =  $p < .05$ , <sup>†</sup> =  $p < .10$

Table 39

*Prediction of mood via self-reported transformative experiences (excluding participants currently under influence of psychedelics)*

| Criterion |   | Predictor       | b     | SE   | z     | p                 | $CI_{lower}^{95\%}$ | $CI_{upper}^{95\%}$ | $\beta$ |
|-----------|---|-----------------|-------|------|-------|-------------------|---------------------|---------------------|---------|
| TE        | ← | TE_Desire       | 0.22  | 0.04 | 6.06  | <.001***          | 0.15                | 0.30                | 0.22    |
| TE        | ← | TE_Expect       | 0.17  | 0.04 | 4.26  | <.001***          | 0.09                | 0.25                | 0.15    |
| TE        | ← | Psychedelics    | 0.67  | 0.15 | 4.50  | <.001***          | 0.38                | 0.97                | 0.14    |
| TE        | ← | Nicotine        | 0.22  | 0.12 | 1.77  | .077 <sup>†</sup> | -0.02               | 0.46                | 0.05    |
| TE        | ← | Alcohol         | -0.54 | 0.14 | -3.74 | <.001***          | -0.82               | -0.26               | -0.10   |
| TE        | ← | Stimulants      | 0.15  | 0.16 | 0.95  | .344              | -0.16               | 0.47                | 0.03    |
| TE        | ← | Euphorics       | 0.22  | 0.15 | 1.39  | .164              | -0.09               | 0.52                | 0.04    |
| TE        | ← | Cannabinoids    | 0.10  | 0.12 | 0.78  | .433              | -0.15               | 0.34                | 0.02    |
| TE        | ← | Benzodiazepines | 0.02  | 0.33 | 0.06  | .953              | -0.63               | 0.67                | 0.00    |
| TE        | ← | Inhalants       | -0.22 | 0.25 | -0.90 | .370              | -0.70               | 0.26                | -0.03   |
| TE        | ← | Narcotics       | 0.15  | 0.42 | 0.37  | .714              | -0.67               | 0.98                | 0.01    |
| TE        | ← | Others          | 0.32  | 0.26 | 1.26  | .206              | -0.18               | 0.83                | 0.03    |
| TE        | ← | Gender_1        | -0.03 | 0.41 | -0.07 | .944              | -0.84               | 0.78                | -0.01   |
| TE        | ← | Gender_2        | 0.10  | 0.41 | 0.25  | .801              | -0.70               | 0.91                | 0.02    |
| TE        | ← | Education_1     | 0.19  | 0.26 | 0.76  | .447              | -0.31               | 0.70                | 0.02    |
| TE        | ← | Education_2     | 0.45  | 0.17 | 2.59  | .010**            | 0.11                | 0.79                | 0.09    |
| TE        | ← | Education_3     | -0.20 | 0.19 | -1.07 | .285              | -0.57               | 0.17                | -0.03   |
| TE        | ← | Education_4     | 0.19  | 0.15 | 1.26  | .206              | -0.11               | 0.49                | 0.05    |
| TE        | ← | Age             | 0.01  | 0.01 | 1.65  | .099 <sup>†</sup> | 0.00                | 0.02                | 0.05    |
| TE        | ← | Religion        | 0.10  | 0.03 | 2.83  | .005**            | 0.03                | 0.16                | 0.08    |
| TE        | ← | Conservatism    | -0.08 | 0.05 | -1.64 | .101              | -0.17               | 0.02                | -0.05   |
| Mood      | ← | TE              | 0.08  | 0.01 | 7.02  | <.001***          | 0.06                | 0.10                | 0.21    |

|          |    |                 |       |      |       |                      |       |       |       |
|----------|----|-----------------|-------|------|-------|----------------------|-------|-------|-------|
| Mood     | ←  | Psychedelics    | 0.09  | 0.06 | 1.50  | .134                 | -0.03 | 0.22  | 0.05  |
| Mood     | ←  | Nicotine        | 0.05  | 0.05 | 0.88  | .379                 | -0.06 | 0.15  | 0.03  |
| Mood     | ←  | Alcohol         | -0.09 | 0.06 | -1.46 | .144                 | -0.20 | 0.03  | -0.04 |
| Mood     | ←  | Stimulants      | 0.07  | 0.07 | 0.98  | .326                 | -0.06 | 0.20  | 0.03  |
| Mood     | ←  | Euphorics       | -0.05 | 0.06 | -0.72 | .470                 | -0.17 | 0.08  | -0.02 |
| Mood     | ←  | Cannabinoids    | 0.06  | 0.05 | 1.08  | .279                 | -0.05 | 0.16  | 0.04  |
| Mood     | ←  | Benzodiazepines | -0.16 | 0.14 | -1.19 | .235                 | -0.43 | 0.11  | -0.04 |
| Mood     | ←  | Inhalants       | 0.02  | 0.10 | 0.23  | .821                 | -0.18 | 0.22  | 0.01  |
| Mood     | ←  | Narcotics       | -0.02 | 0.17 | -0.14 | .887                 | -0.36 | 0.31  | 0.00  |
| Mood     | ←  | Others          | -0.06 | 0.11 | -0.58 | .560                 | -0.27 | 0.15  | -0.02 |
| Mood     | ←  | Gender_1        | 0.22  | 0.18 | 1.24  | .215                 | -0.13 | 0.57  | 0.14  |
| Mood     | ←  | Gender_2        | 0.28  | 0.18 | 1.58  | .114                 | -0.07 | 0.63  | 0.18  |
| Mood     | ←  | Education_1     | 0.08  | 0.11 | 0.80  | .424                 | -0.12 | 0.29  | 0.03  |
| Mood     | ←  | Education_2     | -0.13 | 0.07 | -1.83 | .067 <sup>†</sup>    | -0.27 | 0.01  | -0.07 |
| Mood     | ←  | Education_3     | -0.10 | 0.08 | -1.33 | .184                 | -0.26 | 0.05  | -0.05 |
| Mood     | ←  | Education_4     | -0.13 | 0.06 | -2.07 | .038 <sup>*</sup>    | -0.25 | -0.01 | -0.08 |
| Mood     | ←  | Age             | 0.01  | 0.00 | 2.35  | .019 <sup>*</sup>    | 0.00  | 0.01  | 0.08  |
| Mood     | ←  | Religion        | -0.01 | 0.01 | -0.44 | .657                 | -0.03 | 0.02  | -0.01 |
| Mood     | ←  | Conservatism    | 0.00  | 0.02 | -0.25 | .803                 | -0.04 | 0.03  | -0.01 |
| Direct   | on | Mood            | -0.09 | 0.06 | -1.46 | .144                 | -0.20 | 0.03  | -0.04 |
| Indirect | on | Mood            | -0.04 | 0.01 | -3.30 | <.001 <sup>***</sup> | -0.07 | -0.02 | -0.02 |
| Total    | on | Mood            | -0.13 | 0.06 | -2.16 | .031 <sup>*</sup>    | -0.25 | -0.01 | -0.07 |

*Note.* Enter notes. \*\*\* =  $p < .001$ , \*\* =  $p < .01$ , \* =  $p < .05$ , † =  $p < .10$

Table 40

*Prediction of mood via social connectedness (excluding participants currently under influence of psychedelics)*

| Criterion   | Predictor         | b     | SE   | z     | p                 | $CI_{lower}^{95\%}$ | $CI_{upper}^{95\%}$ | $\beta$ |
|-------------|-------------------|-------|------|-------|-------------------|---------------------|---------------------|---------|
| Social Con. | ← Psychedelics    | 0.33  | 0.13 | 2.62  | .009**            | 0.08                | 0.58                | 0.09    |
| Social Con. | ← Nicotine        | 0.14  | 0.11 | 1.31  | .191              | -0.07               | 0.34                | 0.04    |
| Social Con. | ← Alcohol         | -0.22 | 0.12 | -1.85 | .065 <sup>†</sup> | -0.46               | 0.01                | -0.06   |
| Social Con. | ← Stimulants      | -0.10 | 0.14 | -0.73 | .466              | -0.37               | 0.17                | -0.03   |
| Social Con. | ← Euphorics       | 0.07  | 0.13 | 0.56  | .572              | -0.18               | 0.33                | 0.02    |
| Social Con. | ← Cannabinoids    | 0.18  | 0.11 | 1.68  | .094 <sup>†</sup> | -0.03               | 0.38                | 0.06    |
| Social Con. | ← Benzodiazepines | -0.12 | 0.28 | -0.43 | .670              | -0.67               | 0.43                | -0.01   |
| Social Con. | ← Inhalants       | -0.03 | 0.21 | -0.13 | .900              | -0.43               | 0.38                | 0.00    |
| Social Con. | ← Narcotics       | 0.35  | 0.36 | 0.98  | .326              | -0.35               | 1.05                | 0.03    |
| Social Con. | ← Others          | -0.02 | 0.22 | -0.08 | .937              | -0.44               | 0.41                | 0.00    |
| Social Con. | ← Gender_1        | -0.31 | 0.36 | -0.85 | .396              | -1.02               | 0.40                | -0.10   |
| Social Con. | ← Gender_2        | -0.01 | 0.36 | -0.03 | .977              | -0.72               | 0.70                | 0.00    |
| Social Con. | ← Education_1     | -0.03 | 0.22 | -0.15 | .884              | -0.46               | 0.39                | 0.00    |
| Social Con. | ← Education_2     | -0.10 | 0.15 | -0.66 | .510              | -0.39               | 0.19                | -0.03   |
| Social Con. | ← Education_3     | 0.06  | 0.16 | 0.35  | .724              | -0.26               | 0.37                | 0.01    |
| Social Con. | ← Education_4     | -0.18 | 0.13 | -1.41 | .159              | -0.43               | 0.07                | -0.06   |
| Social Con. | ← Age             | 0.01  | 0.00 | 2.18  | .029*             | 0.00                | 0.02                | 0.07    |
| Social Con. | ← Religion        | 0.08  | 0.03 | 2.83  | .005**            | 0.03                | 0.14                | 0.08    |
| Social Con. | ← Conservatism    | 0.01  | 0.04 | 0.25  | .799              | -0.07               | 0.09                | 0.01    |
| Mood        | ← Social Con.     | 0.12  | 0.01 | 8.04  | <.001***          | 0.09                | 0.14                | 0.23    |
| Mood        | ← Psychedelics    | 0.12  | 0.06 | 1.94  | .053 <sup>†</sup> | 0.00                | 0.24                | 0.06    |
| Mood        | ← Nicotine        | 0.05  | 0.05 | 0.94  | .346              | -0.05               | 0.15                | 0.03    |

|          |    |                 |       |      |       |                   |       |       |       |
|----------|----|-----------------|-------|------|-------|-------------------|-------|-------|-------|
| Mood     | ←  | Alcohol         | -0.12 | 0.06 | -2.06 | .039*             | -0.24 | -0.01 | -0.06 |
| Mood     | ←  | Stimulants      | 0.09  | 0.07 | 1.42  | .156              | -0.04 | 0.22  | 0.05  |
| Mood     | ←  | Euphorics       | -0.03 | 0.06 | -0.54 | .591              | -0.16 | 0.09  | -0.02 |
| Mood     | ←  | Cannabinoids    | 0.06  | 0.05 | 1.17  | .240              | -0.04 | 0.16  | 0.04  |
| Mood     | ←  | Benzodiazepines | -0.14 | 0.14 | -1.02 | .306              | -0.41 | 0.13  | -0.03 |
| Mood     | ←  | Inhalants       | 0.01  | 0.10 | 0.12  | .901              | -0.18 | 0.21  | 0.00  |
| Mood     | ←  | Narcotics       | -0.06 | 0.17 | -0.35 | .726              | -0.40 | 0.28  | -0.01 |
| Mood     | ←  | Others          | -0.03 | 0.11 | -0.31 | .754              | -0.24 | 0.17  | -0.01 |
| Mood     | ←  | Gender_1        | 0.24  | 0.18 | 1.33  | .183              | -0.11 | 0.59  | 0.15  |
| Mood     | ←  | Gender_2        | 0.27  | 0.18 | 1.54  | .124              | -0.08 | 0.62  | 0.17  |
| Mood     | ←  | Education_1     | 0.10  | 0.11 | 0.97  | .334              | -0.10 | 0.31  | 0.03  |
| Mood     | ←  | Education_2     | -0.10 | 0.07 | -1.34 | .181              | -0.24 | 0.04  | -0.05 |
| Mood     | ←  | Education_3     | -0.14 | 0.08 | -1.77 | .076 <sup>†</sup> | -0.29 | 0.01  | -0.06 |
| Mood     | ←  | Education_4     | -0.10 | 0.06 | -1.65 | .100 <sup>†</sup> | -0.23 | 0.02  | -0.06 |
| Mood     | ←  | Age             | 0.00  | 0.00 | 1.78  | .075 <sup>†</sup> | 0.00  | 0.01  | 0.06  |
| Mood     | ←  | Religion        | -0.01 | 0.01 | -0.38 | .705              | -0.03 | 0.02  | -0.01 |
| Mood     | ←  | Conservatism    | -0.01 | 0.02 | -0.76 | .449              | -0.05 | 0.02  | -0.02 |
| Indirect | on | Mood            | 0.04  | 0.02 | 2.49  | .013*             | 0.01  | 0.07  | 0.02  |
| Direct   | on | Mood            | 0.12  | 0.06 | 1.94  | .053 <sup>†</sup> | 0.00  | 0.24  | 0.06  |
| Total    | on | Mood            | 0.16  | 0.06 | 2.50  | .012*             | 0.03  | 0.28  | 0.09  |

*Note.* Enter notes. \*\*\* =  $p < .001$ , \*\* =  $p < .01$ , \* =  $p < .05$ , <sup>†</sup> =  $p < .10$

Table 41

*Prediction of transformative experiences (24h vs. last week; excluding participants currently under influence of psychedelics)*

| Criterion        | Predictor             | b     | SE   | z     | p                 | $CI_{lower}^{95\%}$ | $CI_{upper}^{95\%}$ | $\beta$ |
|------------------|-----------------------|-------|------|-------|-------------------|---------------------|---------------------|---------|
| TE               | ← Psychedelics (24h)  | 0.99  | 0.17 | 5.65  | <.001***          | 0.64                | 1.33                | 0.18    |
| TE               | ← Psychedelics (week) | 0.24  | 0.23 | 1.06  | .287              | -0.20               | 0.69                | 0.03    |
| TE               | ← Nicotine            | 0.24  | 0.13 | 1.78  | .076 <sup>†</sup> | -0.02               | 0.49                | 0.05    |
| TE               | ← Alcohol             | -0.71 | 0.15 | -4.67 | <.001***          | -1.01               | -0.41               | -0.14   |
| TE               | ← Stimulants          | 0.21  | 0.17 | 1.25  | .212              | -0.12               | 0.55                | 0.04    |
| TE               | ← Euphorics           | 0.30  | 0.16 | 1.80  | .072 <sup>†</sup> | -0.03               | 0.62                | 0.06    |
| TE               | ← Cannabinoids        | 0.28  | 0.13 | 2.09  | .037*             | 0.02                | 0.53                | 0.07    |
| TE               | ← Benzodiazepines     | 0.09  | 0.35 | 0.25  | .806              | -0.60               | 0.78                | 0.01    |
| TE               | ← Inhalants           | -0.14 | 0.26 | -0.52 | .600              | -0.65               | 0.37                | -0.02   |
| TE               | ← Narcotics           | 0.14  | 0.45 | 0.31  | .753              | -0.74               | 1.02                | 0.01    |
| TE               | ← Others              | 0.40  | 0.27 | 1.46  | .143              | -0.14               | 0.94                | 0.04    |
| TE               | ← Gender_1            | -0.28 | 0.44 | -0.63 | .529              | -1.13               | 0.58                | -0.07   |
| TE               | ← Gender_2            | -0.15 | 0.44 | -0.33 | .739              | -1.00               | 0.71                | -0.04   |
| TE               | ← Education_1         | 0.04  | 0.27 | 0.14  | .891              | -0.50               | 0.57                | 0.00    |
| TE               | ← Education_2         | 0.32  | 0.19 | 1.70  | .089 <sup>†</sup> | -0.05               | 0.68                | 0.06    |
| TE               | ← Education_3         | -0.40 | 0.20 | -2.01 | .045*             | -0.80               | -0.01               | -0.07   |
| TE               | ← Education_4         | 0.05  | 0.16 | 0.29  | .775              | -0.27               | 0.36                | 0.01    |
| TE               | ← Age                 | 0.00  | 0.01 | 0.02  | .981              | -0.01               | 0.01                | 0.00    |
| TE               | ← Religion            | 0.14  | 0.04 | 3.86  | <.001***          | 0.07                | 0.21                | 0.11    |
| TE               | ← Conservatism        | -0.11 | 0.05 | -2.09 | .036*             | -0.21               | -0.01               | -0.06   |
| $\Delta 24/week$ |                       | 0.74  | 0.25 | 2.93  | .003**            | 0.25                | 1.24                | 0.14    |

Note. Enter notes. \*\*\* =  $p < .001$ , \*\* =  $p < .01$ , \* =  $p < .05$ , <sup>†</sup> =  $p < .10$

Table 42

*Prediction of epistemically transformative experiences (24h vs. last week; excluding participants currently under influence of psychedelics)*

| Criterion        | Predictor             | b     | SE   | z     | p        | $CI_{lower}^{95\%}$ | $CI_{upper}^{95\%}$ | $\beta$ |
|------------------|-----------------------|-------|------|-------|----------|---------------------|---------------------|---------|
| ETE              | ← Psychedelics (24h)  | 0.51  | 0.17 | 3.03  | .002**   | 0.18                | 0.83                | 0.10    |
| ETE              | ← Psychedelics (week) | 0.01  | 0.22 | 0.07  | .947     | -0.41               | 0.44                | 0.00    |
| ETE              | ← Nicotine            | 0.12  | 0.13 | 0.92  | .359     | -0.13               | 0.36                | 0.03    |
| ETE              | ← Alcohol             | -0.91 | 0.15 | -6.20 | <.001*** | -1.20               | -0.62               | -0.19   |
| ETE              | ← Stimulants          | 0.39  | 0.16 | 2.41  | .016*    | 0.07                | 0.71                | 0.08    |
| ETE              | ← Euphorics           | 0.22  | 0.16 | 1.38  | .168     | -0.09               | 0.52                | 0.05    |
| ETE              | ← Cannabinoids        | 0.26  | 0.13 | 2.08  | .038*    | 0.01                | 0.51                | 0.07    |
| ETE              | ← Benzodiazepines     | -0.22 | 0.34 | -0.66 | .509     | -0.88               | 0.44                | -0.02   |
| ETE              | ← Inhalants           | -0.29 | 0.25 | -1.16 | .248     | -0.78               | 0.20                | -0.04   |
| ETE              | ← Narcotics           | 0.11  | 0.42 | 0.27  | .787     | -0.72               | 0.95                | 0.01    |
| ETE              | ← Others              | 0.77  | 0.26 | 2.93  | .003**   | 0.26                | 1.29                | 0.09    |
| ETE              | ← Gender_1            | -0.14 | 0.42 | -0.33 | .745     | -0.96               | 0.68                | -0.03   |
| ETE              | ← Gender_2            | -0.13 | 0.42 | -0.31 | .756     | -0.95               | 0.69                | -0.03   |
| ETE              | ← Education_1         | 0.31  | 0.26 | 1.18  | .238     | -0.21               | 0.83                | 0.04    |
| ETE              | ← Education_2         | 0.18  | 0.18 | 1.00  | .315     | -0.17               | 0.53                | 0.04    |
| ETE              | ← Education_3         | -0.09 | 0.19 | -0.47 | .638     | -0.47               | 0.29                | -0.02   |
| ETE              | ← Education_4         | 0.07  | 0.16 | 0.42  | .675     | -0.24               | 0.37                | 0.02    |
| ETE              | ← Age                 | 0.00  | 0.01 | 0.06  | .949     | -0.01               | 0.01                | 0.00    |
| ETE              | ← Religion            | 0.13  | 0.03 | 3.71  | <.001*** | 0.06                | 0.20                | 0.11    |
| ETE              | ← Conservatism        | -0.12 | 0.05 | -2.50 | .013*    | -0.22               | -0.03               | -0.07   |
| $\Delta 24/week$ |                       | 0.49  | 0.24 | 2.02  | .044*    | 0.01                | 0.97                | 0.09    |

Note. Enter notes. \*\*\* =  $p < .001$ , \*\* =  $p < .01$ , \* =  $p < .05$ , † =  $p < .10$

Table 43

*Prediction of transformative experiences, controlling for expectations and desires (24h vs. last week; excluding participants currently under influence of psychedelics)*

| Criterion | Predictor             | b     | SE   | z     | p        | $CI_{lower}^{95\%}$ | $CI_{upper}^{95\%}$ | $\beta$ |
|-----------|-----------------------|-------|------|-------|----------|---------------------|---------------------|---------|
| TE        | ← TE_Desire           | 0.22  | 0.04 | 6.10  | <.001*** | 0.15                | 0.30                | 0.22    |
| TE        | ← TE_Expect           | 0.17  | 0.04 | 4.19  | <.001*** | 0.09                | 0.24                | 0.15    |
| TE        | ← Psychedelics (24h)  | 0.83  | 0.16 | 5.04  | <.001*** | 0.51                | 1.15                | 0.15    |
| TE        | ← Psychedelics (week) | 0.23  | 0.21 | 1.07  | .283     | -0.19               | 0.65                | 0.03    |
| TE        | ← Nicotine            | 0.24  | 0.12 | 1.90  | .058†    | -0.01               | 0.48                | 0.05    |
| TE        | ← Alcohol             | -0.53 | 0.14 | -3.72 | <.001*** | -0.82               | -0.25               | -0.10   |
| TE        | ← Stimulants          | 0.15  | 0.16 | 0.95  | .343     | -0.16               | 0.47                | 0.03    |
| TE        | ← Euphorics           | 0.25  | 0.15 | 1.59  | .111     | -0.06               | 0.55                | 0.05    |
| TE        | ← Cannabinoids        | 0.09  | 0.12 | 0.70  | .484     | -0.16               | 0.33                | 0.02    |
| TE        | ← Benzodiazepines     | -0.01 | 0.33 | -0.02 | .982     | -0.66               | 0.64                | 0.00    |
| TE        | ← Inhalants           | -0.20 | 0.24 | -0.80 | .422     | -0.68               | 0.28                | -0.02   |
| TE        | ← Narcotics           | 0.22  | 0.42 | 0.51  | .607     | -0.61               | 1.04                | 0.02    |
| TE        | ← Others              | 0.37  | 0.26 | 1.46  | .145     | -0.13               | 0.88                | 0.04    |
| TE        | ← Gender_1            | -0.07 | 0.41 | -0.16 | .873     | -0.87               | 0.74                | -0.02   |
| TE        | ← Gender_2            | 0.06  | 0.41 | 0.15  | .882     | -0.74               | 0.87                | 0.01    |
| TE        | ← Education_1         | 0.13  | 0.26 | 0.51  | .610     | -0.37               | 0.63                | 0.01    |
| TE        | ← Education_2         | 0.44  | 0.17 | 2.49  | .013*    | 0.09                | 0.78                | 0.09    |
| TE        | ← Education_3         | -0.23 | 0.19 | -1.21 | .228     | -0.60               | 0.14                | -0.04   |
| TE        | ← Education_4         | 0.18  | 0.15 | 1.16  | .247     | -0.12               | 0.48                | 0.04    |

|                 |   |              |       |      |       |                   |       |      |       |
|-----------------|---|--------------|-------|------|-------|-------------------|-------|------|-------|
| TE              | ← | Age          | 0.01  | 0.01 | 1.76  | .078 <sup>†</sup> | 0.00  | 0.02 | 0.05  |
| TE              | ← | Religion     | 0.09  | 0.03 | 2.76  | .006**            | 0.03  | 0.16 | 0.07  |
| TE              | ← | Conservatism | -0.08 | 0.05 | -1.60 | .110              | -0.17 | 0.02 | -0.04 |
| <i>Δ24/week</i> |   |              | 0.60  | 0.24 | 2.51  | .012*             | 0.13  | 1.07 | 0.12  |

---

*Note.* Enter notes. \*\*\* =  $p < .001$ , \*\* =  $p < .01$ , \* =  $p < .05$ , <sup>†</sup> =  $p < .10$

Table 44

*Prediction of epistemically transformative experiences, controlling for expectations and desires (24h vs. last week; excluding participants currently under influence of psychedelics)*

| Criterion | Predictor             | b     | SE   | z     | p        | $CI_{lower}^{95\%}$ | $CI_{upper}^{95\%}$ | $\beta$ |
|-----------|-----------------------|-------|------|-------|----------|---------------------|---------------------|---------|
| ETE       | ← TE_Desire           | 0.16  | 0.04 | 4.58  | <.001*** | 0.09                | 0.23                | 0.17    |
| ETE       | ← TE_Expect           | 0.10  | 0.04 | 2.75  | .006**   | 0.03                | 0.18                | 0.10    |
| ETE       | ← Psychedelics (24h)  | 0.40  | 0.16 | 2.47  | .014*    | 0.08                | 0.72                | 0.08    |
| ETE       | ← Psychedelics (week) | 0.01  | 0.21 | 0.06  | .953     | -0.40               | 0.43                | 0.00    |
| ETE       | ← Nicotine            | 0.12  | 0.12 | 0.98  | .328     | -0.12               | 0.36                | 0.03    |
| ETE       | ← Alcohol             | -0.80 | 0.14 | -5.59 | <.001*** | -1.08               | -0.52               | -0.17   |
| ETE       | ← Stimulants          | 0.35  | 0.16 | 2.22  | .027*    | 0.04                | 0.66                | 0.07    |
| ETE       | ← Euphorics           | 0.18  | 0.15 | 1.21  | .225     | -0.11               | 0.48                | 0.04    |
| ETE       | ← Cannabinoids        | 0.13  | 0.12 | 1.03  | .302     | -0.11               | 0.37                | 0.03    |
| ETE       | ← Benzodiazepines     | -0.29 | 0.33 | -0.88 | .377     | -0.93               | 0.35                | -0.03   |
| ETE       | ← Inhalants           | -0.33 | 0.24 | -1.35 | .178     | -0.80               | 0.15                | -0.04   |
| ETE       | ← Narcotics           | 0.17  | 0.41 | 0.41  | .681     | -0.64               | 0.98                | 0.01    |
| ETE       | ← Others              | 0.75  | 0.25 | 2.95  | .003**   | 0.25                | 1.25                | 0.08    |
| ETE       | ← Gender_1            | 0.00  | 0.41 | 0.01  | .994     | -0.79               | 0.80                | 0.00    |
| ETE       | ← Gender_2            | 0.00  | 0.41 | 0.00  | .998     | -0.80               | 0.79                | 0.00    |
| ETE       | ← Education_1         | 0.37  | 0.26 | 1.45  | .148     | -0.13               | 0.87                | 0.05    |
| ETE       | ← Education_2         | 0.27  | 0.17 | 1.53  | .126     | -0.07               | 0.61                | 0.06    |
| ETE       | ← Education_3         | 0.03  | 0.19 | 0.15  | .880     | -0.34               | 0.40                | 0.01    |
| ETE       | ← Education_4         | 0.16  | 0.15 | 1.03  | .305     | -0.14               | 0.45                | 0.04    |
| ETE       | ← Age                 | 0.01  | 0.01 | 1.23  | .217     | 0.00                | 0.02                | 0.04    |
| ETE       | ← Religion            | 0.10  | 0.03 | 2.95  | .003**   | 0.03                | 0.17                | 0.08    |
| ETE       | ← Conservatism        | -0.10 | 0.05 | -2.08 | .037*    | -0.19               | -0.01               | -0.06   |

|                  |      |      |      |      |       |      |      |
|------------------|------|------|------|------|-------|------|------|
| $\Delta 24/week$ | 0.39 | 0.24 | 1.64 | .101 | -0.08 | 0.85 | 0.07 |
|------------------|------|------|------|------|-------|------|------|

---

*Note.* Enter notes. \*\*\* =  $p < .001$ , \*\* =  $p < .01$ , \* =  $p < .05$ , † =  $p < .10$

Table 45

*Prediction of social connectedness (24h vs. last week; excluding participants currently under influence of psychedelics)*

| Criterion   | Predictor             | b     | SE   | z     | p                 | $CI_{lower}^{95\%}$ | $CI_{upper}^{95\%}$ | $\beta$ |
|-------------|-----------------------|-------|------|-------|-------------------|---------------------|---------------------|---------|
| Social Con. | ← Psychedelics (24h)  | 0.33  | 0.14 | 2.37  | .018*             | 0.06                | 0.60                | 0.08    |
| Social Con. | ← Psychedelics (week) | 0.26  | 0.18 | 1.40  | .160              | -0.10               | 0.61                | 0.04    |
| Social Con. | ← Nicotine            | 0.14  | 0.11 | 1.34  | .181              | -0.07               | 0.35                | 0.04    |
| Social Con. | ← Alcohol             | -0.22 | 0.12 | -1.82 | .069 <sup>†</sup> | -0.46               | 0.02                | -0.06   |
| Social Con. | ← Stimulants          | -0.10 | 0.14 | -0.73 | .464              | -0.37               | 0.17                | -0.03   |
| Social Con. | ← Euphorics           | 0.08  | 0.13 | 0.62  | .535              | -0.18               | 0.34                | 0.02    |
| Social Con. | ← Cannabinoids        | 0.17  | 0.11 | 1.65  | .099 <sup>†</sup> | -0.03               | 0.38                | 0.06    |
| Social Con. | ← Benzodiazepines     | -0.12 | 0.28 | -0.42 | .672              | -0.67               | 0.43                | -0.01   |
| Social Con. | ← Inhalants           | -0.01 | 0.21 | -0.07 | .947              | -0.42               | 0.39                | 0.00    |
| Social Con. | ← Narcotics           | 0.36  | 0.36 | 1.01  | .311              | -0.34               | 1.06                | 0.03    |
| Social Con. | ← Others              | -0.01 | 0.22 | -0.04 | .970              | -0.43               | 0.42                | 0.00    |
| Social Con. | ← Gender_1            | -0.30 | 0.36 | -0.81 | .418              | -1.01               | 0.42                | -0.09   |
| Social Con. | ← Gender_2            | 0.00  | 0.36 | 0.01  | .990              | -0.71               | 0.72                | 0.00    |
| Social Con. | ← Education_1         | -0.05 | 0.22 | -0.21 | .834              | -0.47               | 0.38                | -0.01   |
| Social Con. | ← Education_2         | -0.10 | 0.15 | -0.67 | .503              | -0.39               | 0.19                | -0.03   |
| Social Con. | ← Education_3         | 0.05  | 0.16 | 0.33  | .744              | -0.26               | 0.36                | 0.01    |
| Social Con. | ← Education_4         | -0.19 | 0.13 | -1.44 | .151              | -0.44               | 0.07                | -0.06   |
| Social Con. | ← Age                 | 0.01  | 0.00 | 2.18  | .029*             | 0.00                | 0.02                | 0.07    |
| Social Con. | ← Religion            | 0.08  | 0.03 | 2.82  | .005**            | 0.02                | 0.14                | 0.08    |
| Social Con. | ← Conservatism        | 0.01  | 0.04 | 0.24  | .807              | -0.07               | 0.09                | 0.01    |
|             | $\Delta 24/week$      | 0.07  | 0.20 | 0.36  | .716              | -0.32               | 0.47                | 0.03    |

*Note.* Enter notes. \*\*\* =  $p < .001$ , \*\* =  $p < .01$ , \* =  $p < .05$ , <sup>†</sup> =  $p < .10$

Table 46

*Prediction of mood (24h vs. last week; excluding participants currently under influence of psychedelics)*

| Criterion        | Predictor             | b     | SE   | z     | p                 | $CI_{lower}^{95\%}$ | $CI_{upper}^{95\%}$ | $\beta$ |
|------------------|-----------------------|-------|------|-------|-------------------|---------------------|---------------------|---------|
| Mood             | ← Psychedelics (24h)  | 0.26  | 0.07 | 3.81  | <.001***          | 0.13                | 0.40                | 0.12    |
| Mood             | ← Psychedelics (week) | -0.07 | 0.09 | -0.75 | .453              | -0.24               | 0.11                | -0.02   |
| Mood             | ← Nicotine            | 0.07  | 0.05 | 1.32  | .185              | -0.03               | 0.17                | 0.04    |
| Mood             | ← Alcohol             | -0.14 | 0.06 | -2.35 | .019*             | -0.26               | -0.02               | -0.07   |
| Mood             | ← Stimulants          | 0.08  | 0.07 | 1.18  | .240              | -0.05               | 0.21                | 0.04    |
| Mood             | ← Euphorics           | -0.01 | 0.06 | -0.17 | .866              | -0.14               | 0.12                | -0.01   |
| Mood             | ← Cannabinoids        | 0.07  | 0.05 | 1.36  | .175              | -0.03               | 0.17                | 0.05    |
| Mood             | ← Benzodiazepines     | -0.17 | 0.14 | -1.20 | .229              | -0.44               | 0.11                | -0.04   |
| Mood             | ← Inhalants           | 0.02  | 0.10 | 0.17  | .865              | -0.18               | 0.22                | 0.01    |
| Mood             | ← Narcotics           | 0.02  | 0.18 | 0.10  | .920              | -0.33               | 0.36                | 0.00    |
| Mood             | ← Others              | -0.01 | 0.11 | -0.10 | .923              | -0.22               | 0.20                | 0.00    |
| Mood             | ← Gender_1            | 0.20  | 0.18 | 1.09  | .274              | -0.16               | 0.56                | 0.13    |
| Mood             | ← Gender_2            | 0.27  | 0.18 | 1.48  | .140              | -0.09               | 0.62                | 0.17    |
| Mood             | ← Education_1         | 0.07  | 0.11 | 0.62  | .537              | -0.15               | 0.28                | 0.02    |
| Mood             | ← Education_2         | -0.12 | 0.07 | -1.59 | .112              | -0.26               | 0.03                | -0.06   |
| Mood             | ← Education_3         | -0.14 | 0.08 | -1.83 | .068 <sup>†</sup> | -0.30               | 0.01                | -0.06   |
| Mood             | ← Education_4         | -0.14 | 0.06 | -2.11 | .035*             | -0.26               | -0.01               | -0.08   |
| Mood             | ← Age                 | 0.01  | 0.00 | 2.39  | .017*             | 0.00                | 0.01                | 0.08    |
| Mood             | ← Religion            | 0.00  | 0.01 | 0.18  | .855              | -0.03               | 0.03                | 0.01    |
| Mood             | ← Conservatism        | -0.01 | 0.02 | -0.63 | .531              | -0.05               | 0.03                | -0.02   |
| $\Delta 24/week$ |                       | 0.33  | 0.10 | 3.29  | <.001***          | 0.13                | 0.53                | 0.15    |

Note. Enter notes. \*\*\* =  $p < .001$ , \*\* =  $p < .01$ , \* =  $p < .05$ , † =  $p < .10$

Table 47

*Prediction of mood via self-reported transformative experiences (24h vs. last week; excluding participants currently under influence of psychedelics)*

| Criterion | Predictor             | b     | SE   | z     | p        | $CI_{lower}^{95\%}$ | $CI_{upper}^{95\%}$ | $\beta$ |
|-----------|-----------------------|-------|------|-------|----------|---------------------|---------------------|---------|
| TE        | ← TE_Expect           | 0.17  | 0.04 | 4.17  | <.001*** | 0.09                | 0.24                | 0.15    |
| TE        | ← TE_Desire           | 0.22  | 0.04 | 6.11  | <.001*** | 0.15                | 0.30                | 0.22    |
| TE        | ← Psychedelics (24h)  | 0.83  | 0.16 | 5.04  | <.001*** | 0.51                | 1.15                | 0.15    |
| TE        | ← Psychedelics (week) | 0.23  | 0.21 | 1.09  | .277     | -0.19               | 0.65                | 0.03    |
| TE        | ← Nicotine            | 0.23  | 0.12 | 1.88  | .060†    | -0.01               | 0.48                | 0.05    |
| TE        | ← Alcohol             | -0.53 | 0.14 | -3.71 | <.001*** | -0.81               | -0.25               | -0.10   |
| TE        | ← Stimulants          | 0.15  | 0.16 | 0.95  | .342     | -0.16               | 0.47                | 0.03    |
| TE        | ← Euphorics           | 0.25  | 0.15 | 1.61  | .107     | -0.05               | 0.55                | 0.05    |
| TE        | ← Cannabinoids        | 0.09  | 0.12 | 0.69  | .493     | -0.16               | 0.33                | 0.02    |
| TE        | ← Benzodiazepines     | 0.00  | 0.33 | -0.02 | .988     | -0.65               | 0.64                | 0.00    |
| TE        | ← Inhalants           | -0.20 | 0.24 | -0.82 | .415     | -0.68               | 0.28                | -0.02   |
| TE        | ← Narcotics           | 0.22  | 0.42 | 0.52  | .605     | -0.61               | 1.04                | 0.02    |
| TE        | ← Others              | 0.37  | 0.26 | 1.45  | .148     | -0.13               | 0.87                | 0.04    |
| TE        | ← Gender_1            | -0.07 | 0.41 | -0.17 | .869     | -0.87               | 0.74                | -0.02   |
| TE        | ← Gender_2            | 0.06  | 0.41 | 0.15  | .884     | -0.74               | 0.86                | 0.01    |
| TE        | ← Education_1         | 0.13  | 0.26 | 0.51  | .609     | -0.37               | 0.63                | 0.02    |
| TE        | ← Education_2         | 0.43  | 0.17 | 2.46  | .014*    | 0.09                | 0.77                | 0.09    |
| TE        | ← Education_3         | -0.23 | 0.19 | -1.23 | .218     | -0.60               | 0.14                | -0.04   |
| TE        | ← Education_4         | 0.17  | 0.15 | 1.12  | .265     | -0.13               | 0.47                | 0.04    |

|          |    |                     |       |      |       |                   |       |       |       |
|----------|----|---------------------|-------|------|-------|-------------------|-------|-------|-------|
| TE       | ←  | Age                 | 0.01  | 0.01 | 1.74  | .081 <sup>†</sup> | 0.00  | 0.02  | 0.05  |
| TE       | ←  | Religion            | 0.09  | 0.03 | 2.76  | .006**            | 0.03  | 0.16  | 0.07  |
| TE       | ←  | Conservatism        | -0.08 | 0.05 | -1.60 | .110              | -0.17 | 0.02  | -0.04 |
| Mood     | ←  | TE                  | 0.08  | 0.01 | 6.80  | <.001***          | 0.06  | 0.10  | 0.20  |
| Mood     | ←  | Psychedelics (24h)  | 0.19  | 0.07 | 2.72  | .007**            | 0.05  | 0.32  | 0.09  |
| Mood     | ←  | Psychedelics (week) | -0.09 | 0.09 | -0.99 | .322              | -0.26 | 0.09  | -0.03 |
| Mood     | ←  | Nicotine            | 0.05  | 0.05 | 0.99  | .320              | -0.05 | 0.15  | 0.03  |
| Mood     | ←  | Alcohol             | -0.09 | 0.06 | -1.44 | .149              | -0.20 | 0.03  | -0.04 |
| Mood     | ←  | Stimulants          | 0.06  | 0.07 | 0.95  | .344              | -0.07 | 0.19  | 0.03  |
| Mood     | ←  | Euphorics           | -0.03 | 0.06 | -0.54 | .591              | -0.16 | 0.09  | -0.02 |
| Mood     | ←  | Cannabinoids        | 0.05  | 0.05 | 0.95  | .340              | -0.05 | 0.15  | 0.03  |
| Mood     | ←  | Benzodiazepines     | -0.17 | 0.14 | -1.28 | .201              | -0.44 | 0.09  | -0.04 |
| Mood     | ←  | Inhalants           | 0.03  | 0.10 | 0.29  | .774              | -0.17 | 0.23  | 0.01  |
| Mood     | ←  | Narcotics           | 0.01  | 0.17 | 0.04  | .966              | -0.33 | 0.35  | 0.00  |
| Mood     | ←  | Others              | -0.04 | 0.11 | -0.40 | .692              | -0.25 | 0.17  | -0.01 |
| Mood     | ←  | Gender_1            | 0.21  | 0.18 | 1.16  | .245              | -0.14 | 0.56  | 0.13  |
| Mood     | ←  | Gender_2            | 0.27  | 0.18 | 1.50  | .134              | -0.08 | 0.62  | 0.17  |
| Mood     | ←  | Education_1         | 0.06  | 0.11 | 0.55  | .583              | -0.15 | 0.27  | 0.02  |
| Mood     | ←  | Education_2         | -0.14 | 0.07 | -1.96 | .050*             | -0.28 | 0.00  | -0.08 |
| Mood     | ←  | Education_3         | -0.12 | 0.08 | -1.49 | .137              | -0.27 | 0.04  | -0.05 |
| Mood     | ←  | Education_4         | -0.14 | 0.06 | -2.22 | .026*             | -0.26 | -0.02 | -0.09 |
| Mood     | ←  | Age                 | 0.01  | 0.00 | 2.46  | .014*             | 0.00  | 0.01  | 0.08  |
| Mood     | ←  | Religion            | -0.01 | 0.01 | -0.53 | .597              | -0.04 | 0.02  | -0.02 |
| Mood     | ←  | Conservatism        | 0.00  | 0.02 | -0.22 | .828              | -0.04 | 0.03  | -0.01 |
| Direct   | on | Mood                | 0.19  | 0.07 | 2.72  | .007**            | 0.05  | 0.32  | 0.09  |
| Indirect | on | Mood                | 0.06  | 0.02 | 4.05  | <.001***          | 0.03  | 0.10  | 0.03  |

|       |    |      |      |      |      |          |      |      |      |
|-------|----|------|------|------|------|----------|------|------|------|
| Total | on | Mood | 0.25 | 0.07 | 3.64 | <.001*** | 0.12 | 0.39 | 0.12 |
|-------|----|------|------|------|------|----------|------|------|------|

*Note.* Enter notes. \*\*\* =  $p < .001$ , \*\* =  $p < .01$ , \* =  $p < .05$ , † =  $p < .10$

Table 48

*Prediction of mood via social connectedness (24h vs. last week; excluding participants currently under influence of psychedelics)*

| Criterion   |   | Predictor           | b     | SE   | z     | p     | $CI_{lower}^{95\%}$ | $CI_{upper}^{95\%}$ | $\beta$ |
|-------------|---|---------------------|-------|------|-------|-------|---------------------|---------------------|---------|
| Social Con. | ← | Psychedelics (24h)  | 0.33  | 0.14 | 2.35  | .019* | 0.05                | 0.60                | 0.08    |
| Social Con. | ← | Psychedelics (week) | 0.25  | 0.18 | 1.39  | .165  | -0.10               | 0.61                | 0.04    |
| Social Con. | ← | Nicotine            | 0.14  | 0.11 | 1.33  | .183  | -0.07               | 0.35                | 0.04    |
| Social Con. | ← | Alcohol             | -0.22 | 0.12 | -1.84 | .066† | -0.46               | 0.01                | -0.06   |
| Social Con. | ← | Stimulants          | -0.10 | 0.14 | -0.70 | .483  | -0.36               | 0.17                | -0.02   |
| Social Con. | ← | Euphorics           | 0.08  | 0.13 | 0.64  | .521  | -0.17               | 0.34                | 0.02    |
| Social Con. | ← | Cannabinoids        | 0.18  | 0.11 | 1.68  | .094† | -0.03               | 0.38                | 0.06    |
| Social Con. | ← | Benzodiazepines     | -0.12 | 0.28 | -0.42 | .677  | -0.67               | 0.43                | -0.01   |
| Social Con. | ← | Inhalants           | -0.02 | 0.21 | -0.11 | .913  | -0.43               | 0.38                | 0.00    |
| Social Con. | ← | Narcotics           | 0.36  | 0.36 | 1.02  | .308  | -0.33               | 1.06                | 0.03    |
| Social Con. | ← | Others              | -0.01 | 0.22 | -0.05 | .964  | -0.43               | 0.42                | 0.00    |
| Social Con. | ← | Gender_1            | -0.31 | 0.36 | -0.86 | .387  | -1.03               | 0.40                | -0.10   |
| Social Con. | ← | Gender_2            | -0.02 | 0.36 | -0.05 | .962  | -0.73               | 0.69                | -0.01   |
| Social Con. | ← | Education_1         | -0.04 | 0.22 | -0.19 | .851  | -0.47               | 0.39                | -0.01   |
| Social Con. | ← | Education_2         | -0.10 | 0.15 | -0.68 | .497  | -0.39               | 0.19                | -0.03   |
| Social Con. | ← | Education_3         | 0.05  | 0.16 | 0.33  | .744  | -0.26               | 0.36                | 0.01    |
| Social Con. | ← | Education_4         | -0.18 | 0.13 | -1.43 | .154  | -0.44               | 0.07                | -0.06   |
| Social Con. | ← | Age                 | 0.01  | 0.00 | 2.19  | .028* | 0.00                | 0.02                | 0.07    |

|             |    |                     |       |      |       |                   |       |      |       |
|-------------|----|---------------------|-------|------|-------|-------------------|-------|------|-------|
| Social Con. | ←  | Religion            | 0.08  | 0.03 | 2.83  | .005**            | 0.03  | 0.14 | 0.08  |
| Social Con. | ←  | Conservatism        | 0.01  | 0.04 | 0.26  | .798              | -0.07 | 0.09 | 0.01  |
| Mood        | ←  | Social Con.         | 0.12  | 0.01 | 8.06  | <.001***          | 0.09  | 0.14 | 0.23  |
| Mood        | ←  | Psychedelics (24h)  | 0.22  | 0.07 | 3.34  | <.001***          | 0.09  | 0.36 | 0.11  |
| Mood        | ←  | Psychedelics (week) | -0.10 | 0.09 | -1.11 | .265              | -0.27 | 0.07 | -0.03 |
| Mood        | ←  | Nicotine            | 0.05  | 0.05 | 1.07  | .285              | -0.05 | 0.15 | 0.03  |
| Mood        | ←  | Alcohol             | -0.12 | 0.06 | -2.01 | .044*             | -0.23 | 0.00 | -0.06 |
| Mood        | ←  | Stimulants          | 0.09  | 0.07 | 1.37  | .170              | -0.04 | 0.22 | 0.05  |
| Mood        | ←  | Euphorics           | -0.02 | 0.06 | -0.33 | .744              | -0.14 | 0.10 | -0.01 |
| Mood        | ←  | Cannabinoids        | 0.05  | 0.05 | 1.01  | .311              | -0.05 | 0.15 | 0.03  |
| Mood        | ←  | Benzodiazepines     | -0.15 | 0.14 | -1.14 | .255              | -0.42 | 0.11 | -0.04 |
| Mood        | ←  | Inhalants           | 0.02  | 0.10 | 0.21  | .835              | -0.18 | 0.22 | 0.01  |
| Mood        | ←  | Narcotics           | -0.02 | 0.17 | -0.14 | .888              | -0.36 | 0.31 | 0.00  |
| Mood        | ←  | Others              | -0.01 | 0.11 | -0.10 | .921              | -0.22 | 0.20 | 0.00  |
| Mood        | ←  | Gender_1            | 0.22  | 0.18 | 1.24  | .215              | -0.13 | 0.57 | 0.14  |
| Mood        | ←  | Gender_2            | 0.25  | 0.18 | 1.44  | .151              | -0.09 | 0.60 | 0.16  |
| Mood        | ←  | Education_1         | 0.07  | 0.11 | 0.66  | .506              | -0.14 | 0.28 | 0.02  |
| Mood        | ←  | Education_2         | -0.11 | 0.07 | -1.51 | .132              | -0.25 | 0.03 | -0.06 |
| Mood        | ←  | Education_3         | -0.15 | 0.08 | -1.96 | .050 <sup>†</sup> | -0.30 | 0.00 | -0.07 |
| Mood        | ←  | Education_4         | -0.11 | 0.06 | -1.83 | .067 <sup>†</sup> | -0.24 | 0.01 | -0.07 |
| Mood        | ←  | Age                 | 0.00  | 0.00 | 1.92  | .054 <sup>†</sup> | 0.00  | 0.01 | 0.06  |
| Mood        | ←  | Religion            | -0.01 | 0.01 | -0.51 | .612              | -0.03 | 0.02 | -0.01 |
| Mood        | ←  | Conservatism        | -0.01 | 0.02 | -0.70 | .482              | -0.05 | 0.02 | -0.02 |
| Indirect    | on | Mood                | 0.04  | 0.02 | 2.25  | .024*             | 0.00  | 0.07 | 0.02  |
| Direct      | on | Mood                | 0.22  | 0.07 | 3.34  | <.001***          | 0.09  | 0.36 | 0.11  |
| Total       | on | Mood                | 0.26  | 0.07 | 3.80  | <.001***          | 0.13  | 0.40 | 0.12  |

---

*Note.* Enter notes. \*\*\* =  $p < .001$ , \*\* =  $p < .01$ , \* =  $p < .05$ , † =  $p < .10$

Table 49

*Full structural equation model (excluding participants currently under influence of psychedelics)*

| Criterion |   | Predictor              | b     | SE   | z     | p                 | $CI_{lower}^{95\%}$ | $CI_{upper}^{95\%}$ | $\beta$ |
|-----------|---|------------------------|-------|------|-------|-------------------|---------------------|---------------------|---------|
| TE_Expect | ← | Psychedelics (week)    | 0.00  | 0.23 | 0.00  | .997              | -0.45               | 0.45                | 0.00    |
| TE_Expect | ← | Nicotine (week)        | 0.35  | 0.24 | 1.48  | .139              | -0.12               | 0.82                | 0.05    |
| TE_Expect | ← | Alcohol (week)         | -0.49 | 0.17 | -2.79 | .005**            | -0.83               | -0.14               | -0.09   |
| TE_Expect | ← | Stimulants (week)      | 0.28  | 0.24 | 1.16  | .247              | -0.19               | 0.76                | 0.04    |
| TE_Expect | ← | Euphorics (week)       | 0.21  | 0.22 | 0.93  | .352              | -0.23               | 0.64                | 0.03    |
| TE_Expect | ← | Cannabinoids (week)    | -0.04 | 0.18 | -0.23 | .820              | -0.40               | 0.31                | -0.01   |
| TE_Expect | ← | Benzodiazepines (week) | 0.39  | 0.51 | 0.76  | .445              | -0.61               | 1.40                | 0.03    |
| TE_Expect | ← | Inhalants (week)       | -0.16 | 0.34 | -0.48 | .628              | -0.82               | 0.49                | -0.02   |
| TE_Expect | ← | Narcotics (week)       | 0.04  | 0.57 | 0.07  | .948              | -1.08               | 1.15                | 0.00    |
| TE_Expect | ← | Others (week)          | -0.18 | 0.41 | -0.44 | .662              | -0.99               | 0.63                | -0.01   |
| TE_Expect | ← | Psychedelics (24h)     | 0.43  | 0.17 | 2.56  | .011*             | 0.10                | 0.76                | 0.08    |
| TE_Expect | ← | Nicotine (24h)         | -0.04 | 0.13 | -0.32 | .747              | -0.30               | 0.22                | -0.01   |
| TE_Expect | ← | Alcohol (24h)          | -0.24 | 0.14 | -1.74 | .083 <sup>†</sup> | -0.51               | 0.03                | -0.06   |
| TE_Expect | ← | Stimulants (24h)       | 0.17  | 0.19 | 0.92  | .360              | -0.20               | 0.55                | 0.03    |
| TE_Expect | ← | Euphorics (24h)        | 0.13  | 0.18 | 0.73  | .465              | -0.23               | 0.50                | 0.02    |
| TE_Expect | ← | Cannabinoids (24h)     | 0.39  | 0.13 | 2.99  | .003**            | 0.13                | 0.65                | 0.10    |
| TE_Expect | ← | Benzodiazepines (24h)  | -0.13 | 0.42 | -0.30 | .761              | -0.96               | 0.70                | -0.01   |
| TE_Expect | ← | Inhalants (24h)        | -0.03 | 0.34 | -0.10 | .920              | -0.70               | 0.63                | 0.00    |
| TE_Expect | ← | Narcotics (24h)        | 0.64  | 0.63 | 1.02  | .309              | -0.59               | 1.87                | 0.03    |
| TE_Expect | ← | Others (24h)           | -0.14 | 0.32 | -0.43 | .666              | -0.76               | 0.49                | -0.01   |
| TE_Expect | ← | Gender_1               | -0.79 | 0.41 | -1.92 | .055 <sup>†</sup> | -1.60               | 0.02                | -0.21   |
| TE_Expect | ← | Gender_2               | -0.79 | 0.41 | -1.91 | .057 <sup>†</sup> | -1.60               | 0.02                | -0.21   |
| TE_Expect | ← | Education_1            | -0.22 | 0.26 | -0.86 | .392              | -0.74               | 0.29                | -0.03   |

|           |   |                        |       |      |       |                   |       |       |       |
|-----------|---|------------------------|-------|------|-------|-------------------|-------|-------|-------|
| TE_Expect | ← | Education_2            | -0.23 | 0.18 | -1.28 | .200              | -0.58 | 0.12  | -0.05 |
| TE_Expect | ← | Education_3            | -0.44 | 0.20 | -2.26 | .024*             | -0.83 | -0.06 | -0.08 |
| TE_Expect | ← | Education_4            | -0.32 | 0.16 | -2.04 | .041*             | -0.63 | -0.01 | -0.08 |
| TE_Expect | ← | Age                    | -0.02 | 0.01 | -3.45 | <.001***          | -0.03 | -0.01 | -0.11 |
| TE_Expect | ← | Religion               | 0.10  | 0.03 | 2.82  | .005**            | 0.03  | 0.17  | 0.08  |
| TE_Expect | ← | Conservatism           | -0.03 | 0.05 | -0.68 | .494              | -0.13 | 0.06  | -0.02 |
| TE_Desire | ← | Psychedelics (week)    | 0.11  | 0.24 | 0.45  | .656              | -0.37 | 0.59  | 0.01  |
| TE_Desire | ← | Nicotine (week)        | 0.39  | 0.26 | 1.51  | .131              | -0.12 | 0.89  | 0.05  |
| TE_Desire | ← | Alcohol (week)         | -0.60 | 0.19 | -3.22 | .001**            | -0.97 | -0.23 | -0.11 |
| TE_Desire | ← | Stimulants (week)      | -0.01 | 0.26 | -0.02 | .982              | -0.51 | 0.50  | 0.00  |
| TE_Desire | ← | Euphorics (week)       | 0.41  | 0.24 | 1.71  | .088 <sup>†</sup> | -0.06 | 0.87  | 0.06  |
| TE_Desire | ← | Cannabinoids (week)    | 0.02  | 0.19 | 0.12  | .905              | -0.36 | 0.40  | 0.00  |
| TE_Desire | ← | Benzodiazepines (week) | 0.16  | 0.55 | 0.29  | .768              | -0.91 | 1.24  | 0.01  |
| TE_Desire | ← | Inhalants (week)       | 0.20  | 0.36 | 0.56  | .573              | -0.50 | 0.91  | 0.02  |
| TE_Desire | ← | Narcotics (week)       | -0.68 | 0.61 | -1.11 | .268              | -1.87 | 0.52  | -0.04 |
| TE_Desire | ← | Others (week)          | 0.37  | 0.44 | 0.83  | .406              | -0.50 | 1.24  | 0.02  |
| TE_Desire | ← | Psychedelics (24h)     | 0.38  | 0.18 | 2.11  | .035*             | 0.03  | 0.73  | 0.07  |
| TE_Desire | ← | Nicotine (24h)         | -0.10 | 0.14 | -0.71 | .480              | -0.38 | 0.18  | -0.02 |
| TE_Desire | ← | Alcohol (24h)          | -0.49 | 0.15 | -3.34 | <.001***          | -0.78 | -0.20 | -0.11 |
| TE_Desire | ← | Stimulants (24h)       | 0.13  | 0.20 | 0.64  | .525              | -0.27 | 0.53  | 0.02  |
| TE_Desire | ← | Euphorics (24h)        | -0.01 | 0.20 | -0.03 | .979              | -0.39 | 0.38  | 0.00  |
| TE_Desire | ← | Cannabinoids (24h)     | 0.60  | 0.14 | 4.31  | <.001***          | 0.33  | 0.88  | 0.14  |
| TE_Desire | ← | Benzodiazepines (24h)  | 0.68  | 0.45 | 1.50  | .133              | -0.21 | 1.56  | 0.05  |
| TE_Desire | ← | Inhalants (24h)        | 0.17  | 0.36 | 0.46  | .644              | -0.54 | 0.88  | 0.01  |
| TE_Desire | ← | Narcotics (24h)        | -0.35 | 0.67 | -0.52 | .601              | -1.67 | 0.97  | -0.02 |
| TE_Desire | ← | Others (24h)           | -0.05 | 0.34 | -0.15 | .883              | -0.72 | 0.62  | 0.00  |
| TE_Desire | ← | Gender_1               | -0.41 | 0.45 | -0.91 | .364              | -1.29 | 0.47  | -0.10 |

|           |   |                        |       |      |       |          |       |       |       |
|-----------|---|------------------------|-------|------|-------|----------|-------|-------|-------|
| TE_Desire | ← | Gender_2               | -0.42 | 0.45 | -0.93 | .352     | -1.30 | 0.46  | -0.10 |
| TE_Desire | ← | Education_1            | -0.34 | 0.28 | -1.23 | .220     | -0.89 | 0.21  | -0.04 |
| TE_Desire | ← | Education_2            | -0.45 | 0.19 | -2.33 | .020*    | -0.82 | -0.07 | -0.09 |
| TE_Desire | ← | Education_3            | -0.53 | 0.21 | -2.53 | .011*    | -0.95 | -0.12 | -0.09 |
| TE_Desire | ← | Education_4            | -0.40 | 0.17 | -2.38 | .017*    | -0.73 | -0.07 | -0.09 |
| TE_Desire | ← | Age                    | -0.03 | 0.01 | -4.72 | <.001*** | -0.04 | -0.02 | -0.15 |
| TE_Desire | ← | Religion               | 0.14  | 0.04 | 3.69  | <.001*** | 0.06  | 0.21  | 0.11  |
| TE_Desire | ← | Conservatism           | -0.13 | 0.05 | -2.41 | .016*    | -0.23 | -0.02 | -0.07 |
| TE        | ← | TE_Expect              | 0.16  | 0.04 | 4.12  | <.001*** | 0.09  | 0.24  | 0.15  |
| TE        | ← | TE_Desire              | 0.23  | 0.04 | 6.25  | <.001*** | 0.16  | 0.30  | 0.23  |
| TE        | ← | Psychedelics (week)    | 0.33  | 0.23 | 1.45  | .148     | -0.12 | 0.77  | 0.04  |
| TE        | ← | Nicotine (week)        | -0.10 | 0.24 | -0.41 | .680     | -0.56 | 0.36  | -0.01 |
| TE        | ← | Alcohol (week)         | -0.21 | 0.17 | -1.24 | .214     | -0.54 | 0.12  | -0.04 |
| TE        | ← | Stimulants (week)      | -0.02 | 0.24 | -0.07 | .945     | -0.48 | 0.45  | 0.00  |
| TE        | ← | Euphorics (week)       | 0.08  | 0.22 | 0.38  | .700     | -0.35 | 0.51  | 0.01  |
| TE        | ← | Cannabinoids (week)    | -0.08 | 0.18 | -0.43 | .668     | -0.42 | 0.27  | -0.01 |
| TE        | ← | Benzodiazepines (week) | 0.00  | 0.51 | -0.01 | .994     | -1.00 | 0.99  | 0.00  |
| TE        | ← | Inhalants (week)       | 0.20  | 0.33 | 0.60  | .548     | -0.45 | 0.84  | 0.02  |
| TE        | ← | Narcotics (week)       | 0.31  | 0.56 | 0.55  | .585     | -0.80 | 1.41  | 0.02  |
| TE        | ← | Others (week)          | 0.09  | 0.41 | 0.22  | .825     | -0.71 | 0.90  | 0.01  |
| TE        | ← | Psychedelics (24h)     | 0.82  | 0.17 | 4.95  | <.001*** | 0.49  | 1.14  | 0.14  |
| TE        | ← | Nicotine (24h)         | 0.29  | 0.13 | 2.24  | .025*    | 0.04  | 0.54  | 0.06  |
| TE        | ← | Alcohol (24h)          | -0.50 | 0.13 | -3.76 | <.001*** | -0.77 | -0.24 | -0.11 |
| TE        | ← | Stimulants (24h)       | 0.22  | 0.18 | 1.17  | .243     | -0.15 | 0.58  | 0.03  |
| TE        | ← | Euphorics (24h)        | 0.40  | 0.18 | 2.24  | .025*    | 0.05  | 0.76  | 0.07  |
| TE        | ← | Cannabinoids (24h)     | 0.13  | 0.13 | 1.00  | .316     | -0.12 | 0.38  | 0.03  |
| TE        | ← | Benzodiazepines (24h)  | -0.21 | 0.42 | -0.51 | .612     | -1.03 | 0.61  | -0.01 |

|             |   |                        |       |      |       |                   |       |       |       |
|-------------|---|------------------------|-------|------|-------|-------------------|-------|-------|-------|
| TE          | ← | Inhalants (24h)        | -0.58 | 0.33 | -1.77 | .077 <sup>†</sup> | -1.22 | 0.06  | -0.05 |
| TE          | ← | Narcotics (24h)        | 0.26  | 0.62 | 0.41  | .681              | -0.96 | 1.48  | 0.01  |
| TE          | ← | Others (24h)           | 0.46  | 0.31 | 1.46  | .143              | -0.15 | 1.06  | 0.04  |
| TE          | ← | Gender_1               | -0.03 | 0.41 | -0.07 | .945              | -0.83 | 0.78  | -0.01 |
| TE          | ← | Gender_2               | 0.09  | 0.41 | 0.22  | .823              | -0.71 | 0.89  | 0.02  |
| TE          | ← | Education_1            | 0.14  | 0.26 | 0.55  | .582              | -0.36 | 0.65  | 0.02  |
| TE          | ← | Education_2            | 0.40  | 0.18 | 2.29  | .022*             | 0.06  | 0.74  | 0.08  |
| TE          | ← | Education_3            | -0.24 | 0.19 | -1.26 | .208              | -0.61 | 0.13  | -0.04 |
| TE          | ← | Education_4            | 0.17  | 0.15 | 1.08  | .281              | -0.13 | 0.46  | 0.04  |
| TE          | ← | Age                    | 0.01  | 0.01 | 1.95  | .052 <sup>†</sup> | 0.00  | 0.02  | 0.06  |
| TE          | ← | Religion               | 0.09  | 0.03 | 2.73  | .006**            | 0.03  | 0.16  | 0.07  |
| TE          | ← | Conservatism           | -0.08 | 0.05 | -1.63 | .104              | -0.17 | 0.02  | -0.04 |
| Social Con. | ← | TE                     | 0.11  | 0.02 | 4.67  | <.001***          | 0.06  | 0.15  | 0.14  |
| Social Con. | ← | Psychedelics (week)    | 0.26  | 0.19 | 1.39  | .163              | -0.11 | 0.64  | 0.05  |
| Social Con. | ← | Nicotine (week)        | 0.05  | 0.20 | 0.24  | .812              | -0.34 | 0.43  | 0.01  |
| Social Con. | ← | Alcohol (week)         | -0.35 | 0.14 | -2.47 | .014*             | -0.62 | -0.07 | -0.08 |
| Social Con. | ← | Stimulants (week)      | -0.05 | 0.20 | -0.24 | .811              | -0.44 | 0.34  | -0.01 |
| Social Con. | ← | Euphorics (week)       | 0.08  | 0.18 | 0.43  | .665              | -0.28 | 0.44  | 0.02  |
| Social Con. | ← | Cannabinoids (week)    | 0.29  | 0.15 | 1.98  | .048*             | 0.00  | 0.58  | 0.06  |
| Social Con. | ← | Benzodiazepines (week) | -0.05 | 0.42 | -0.11 | .912              | -0.88 | 0.79  | 0.00  |
| Social Con. | ← | Inhalants (week)       | -0.54 | 0.28 | -1.93 | .053 <sup>†</sup> | -1.09 | 0.01  | -0.06 |
| Social Con. | ← | Narcotics (week)       | 0.45  | 0.47 | 0.96  | .339              | -0.47 | 1.38  | 0.03  |
| Social Con. | ← | Others (week)          | -0.24 | 0.34 | -0.70 | .482              | -0.92 | 0.43  | -0.02 |
| Social Con. | ← | Psychedelics (24h)     | 0.20  | 0.14 | 1.43  | .154              | -0.07 | 0.47  | 0.05  |
| Social Con. | ← | Nicotine (24h)         | 0.14  | 0.11 | 1.32  | .187              | -0.07 | 0.35  | 0.04  |
| Social Con. | ← | Alcohol (24h)          | -0.13 | 0.11 | -1.19 | .235              | -0.36 | 0.09  | -0.04 |
| Social Con. | ← | Stimulants (24h)       | -0.07 | 0.15 | -0.46 | .642              | -0.38 | 0.23  | -0.02 |

|             |   |                        |       |      |       |          |       |      |       |
|-------------|---|------------------------|-------|------|-------|----------|-------|------|-------|
| Social Con. | ← | Euphorics (24h)        | 0.02  | 0.15 | 0.10  | .919     | -0.28 | 0.31 | 0.00  |
| Social Con. | ← | Cannabinoids (24h)     | 0.05  | 0.11 | 0.50  | .616     | -0.16 | 0.27 | 0.02  |
| Social Con. | ← | Benzodiazepines (24h)  | -0.11 | 0.35 | -0.31 | .759     | -0.79 | 0.58 | -0.01 |
| Social Con. | ← | Inhalants (24h)        | 0.58  | 0.27 | 2.13  | .034*    | 0.05  | 1.12 | 0.06  |
| Social Con. | ← | Narcotics (24h)        | 0.19  | 0.52 | 0.37  | .709     | -0.83 | 1.22 | 0.01  |
| Social Con. | ← | Others (24h)           | 0.06  | 0.26 | 0.25  | .806     | -0.45 | 0.57 | 0.01  |
| Social Con. | ← | Gender_1               | -0.24 | 0.36 | -0.65 | .513     | -0.94 | 0.47 | -0.08 |
| Social Con. | ← | Gender_2               | 0.05  | 0.36 | 0.15  | .883     | -0.65 | 0.76 | 0.02  |
| Social Con. | ← | Education_1            | -0.04 | 0.22 | -0.19 | .846     | -0.46 | 0.38 | -0.01 |
| Social Con. | ← | Education_2            | -0.11 | 0.15 | -0.78 | .437     | -0.40 | 0.17 | -0.03 |
| Social Con. | ← | Education_3            | 0.10  | 0.16 | 0.63  | .531     | -0.21 | 0.41 | 0.02  |
| Social Con. | ← | Education_4            | -0.16 | 0.13 | -1.29 | .199     | -0.41 | 0.09 | -0.05 |
| Social Con. | ← | Age                    | 0.01  | 0.00 | 2.05  | .041*    | 0.00  | 0.02 | 0.07  |
| Social Con. | ← | Religion               | 0.07  | 0.03 | 2.44  | .015*    | 0.01  | 0.13 | 0.07  |
| Social Con. | ← | Conservatism           | 0.02  | 0.04 | 0.43  | .666     | -0.06 | 0.10 | 0.01  |
| Mood        | ← | TE                     | 0.07  | 0.01 | 5.90  | <.001*** | 0.04  | 0.09 | 0.18  |
| Mood        | ← | Social Con.            | 0.11  | 0.01 | 7.40  | <.001*** | 0.08  | 0.13 | 0.21  |
| Mood        | ← | Psychedelics (week)    | -0.10 | 0.09 | -1.05 | .294     | -0.27 | 0.08 | -0.03 |
| Mood        | ← | Nicotine (week)        | 0.10  | 0.10 | 1.07  | .285     | -0.09 | 0.29 | 0.03  |
| Mood        | ← | Alcohol (week)         | -0.03 | 0.07 | -0.47 | .641     | -0.17 | 0.10 | -0.01 |
| Mood        | ← | Stimulants (week)      | 0.02  | 0.10 | 0.23  | .822     | -0.17 | 0.21 | 0.01  |
| Mood        | ← | Euphorics (week)       | -0.08 | 0.09 | -0.86 | .390     | -0.25 | 0.10 | -0.03 |
| Mood        | ← | Cannabinoids (week)    | 0.02  | 0.07 | 0.33  | .740     | -0.12 | 0.16 | 0.01  |
| Mood        | ← | Benzodiazepines (week) | -0.19 | 0.20 | -0.94 | .345     | -0.59 | 0.21 | -0.03 |
| Mood        | ← | Inhalants (week)       | 0.14  | 0.13 | 1.02  | .309     | -0.13 | 0.40 | 0.03  |
| Mood        | ← | Narcotics (week)       | -0.16 | 0.23 | -0.70 | .482     | -0.60 | 0.28 | -0.02 |
| Mood        | ← | Others (week)          | 0.00  | 0.17 | -0.03 | .979     | -0.33 | 0.32 | 0.00  |

|          |    |                       |       |      |       |                   |       |       |       |
|----------|----|-----------------------|-------|------|-------|-------------------|-------|-------|-------|
| Mood     | ←  | Psychedelics (24h)    | 0.16  | 0.07 | 2.31  | .021*             | 0.02  | 0.29  | 0.07  |
| Mood     | ←  | Nicotine (24h)        | 0.02  | 0.05 | 0.34  | .735              | -0.08 | 0.12  | 0.01  |
| Mood     | ←  | Alcohol (24h)         | -0.04 | 0.05 | -0.73 | .464              | -0.15 | 0.07  | -0.02 |
| Mood     | ←  | Stimulants (24h)      | 0.08  | 0.07 | 1.07  | .285              | -0.07 | 0.22  | 0.03  |
| Mood     | ←  | Euphorics (24h)       | -0.03 | 0.07 | -0.46 | .643              | -0.18 | 0.11  | -0.01 |
| Mood     | ←  | Cannabinoids (24h)    | 0.07  | 0.05 | 1.29  | .196              | -0.03 | 0.17  | 0.04  |
| Mood     | ←  | Benzodiazepines (24h) | -0.13 | 0.17 | -0.75 | .456              | -0.46 | 0.21  | -0.02 |
| Mood     | ←  | Inhalants (24h)       | -0.11 | 0.13 | -0.80 | .426              | -0.37 | 0.15  | -0.02 |
| Mood     | ←  | Narcotics (24h)       | 0.21  | 0.25 | 0.82  | .411              | -0.29 | 0.70  | 0.02  |
| Mood     | ←  | Others (24h)          | -0.07 | 0.13 | -0.56 | .579              | -0.32 | 0.18  | -0.02 |
| Mood     | ←  | Gender_1              | 0.22  | 0.18 | 1.25  | .211              | -0.12 | 0.56  | 0.14  |
| Mood     | ←  | Gender_2              | 0.25  | 0.17 | 1.40  | .160              | -0.10 | 0.59  | 0.16  |
| Mood     | ←  | Education_1           | 0.07  | 0.10 | 0.65  | .513              | -0.14 | 0.27  | 0.02  |
| Mood     | ←  | Education_2           | -0.14 | 0.07 | -1.94 | .053 <sup>†</sup> | -0.28 | 0.00  | -0.07 |
| Mood     | ←  | Education_3           | -0.13 | 0.08 | -1.71 | .086 <sup>†</sup> | -0.28 | 0.02  | -0.06 |
| Mood     | ←  | Education_4           | -0.13 | 0.06 | -2.08 | .038*             | -0.25 | -0.01 | -0.08 |
| Mood     | ←  | Age                   | 0.00  | 0.00 | 2.07  | .038*             | 0.00  | 0.01  | 0.06  |
| Mood     | ←  | Religion              | -0.02 | 0.01 | -1.12 | .263              | -0.04 | 0.01  | -0.03 |
| Mood     | ←  | Conservatism          | -0.01 | 0.02 | -0.32 | .746              | -0.04 | 0.03  | -0.01 |
| Indirect | on | Mood via TE           | 0.05  | 0.01 | 3.79  | <.001***          | 0.03  | 0.08  | 0.03  |
| Indirect | on | Mood via Soc.Con.     | 0.02  | 0.02 | 1.40  | .161              | -0.01 | 0.05  | 0.01  |
| Indirect | on | Mood via both         | 0.01  | 0.00 | 3.09  | .002**            | 0.00  | 0.02  | 0.00  |
| Indirect | on | Mood (all)            | 0.08  | 0.02 | 3.91  | <.001***          | 0.04  | 0.13  | 0.04  |
| Direct   | on | Mood                  | 0.16  | 0.07 | 2.31  | .021*             | 0.02  | 0.29  | 0.07  |
| Total    | on | Mood                  | 0.24  | 0.07 | 3.47  | <.001***          | 0.10  | 0.38  | 0.11  |

*Note.* Enter notes. \*\*\* =  $p < .001$ , \*\* =  $p < .01$ , \* =  $p < .05$ , <sup>†</sup> =  $p < .10$



**Analyses for fully sober participants only**

The following tables show the main results (simple regressions, mediations, and SEM) including only those participants who reported being completely sober (except for nicotine) at the time of data collection, as was specified in the pre-registration.

Table 50

*Prediction of transformative experiences (fully sober participants only)*

| Criterion |   | Predictor       | b     | SE   | z     | p                 | $CI_{lower}^{95\%}$ | $CI_{upper}^{95\%}$ | $\beta$ |
|-----------|---|-----------------|-------|------|-------|-------------------|---------------------|---------------------|---------|
| TE        | ← | Psychedelics    | 0.89  | 0.19 | 4.80  | <.001***          | 0.53                | 1.26                | 0.18    |
| TE        | ← | Nicotine        | 0.24  | 0.15 | 1.54  | .123              | -0.06               | 0.54                | 0.05    |
| TE        | ← | Alcohol         | -0.80 | 0.16 | -5.00 | <.001***          | -1.11               | -0.49               | -0.17   |
| TE        | ← | Stimulants      | 0.23  | 0.21 | 1.11  | .267              | -0.18               | 0.64                | 0.04    |
| TE        | ← | Euphorics       | 0.21  | 0.20 | 1.10  | .273              | -0.17               | 0.60                | 0.04    |
| TE        | ← | Cannabinoids    | 0.31  | 0.15 | 2.07  | .038*             | 0.02                | 0.60                | 0.07    |
| TE        | ← | Benzodiazepines | 0.12  | 0.44 | 0.27  | .787              | -0.75               | 0.98                | 0.01    |
| TE        | ← | Inhalants       | -0.32 | 0.31 | -1.04 | .298              | -0.92               | 0.28                | -0.04   |
| TE        | ← | Narcotics       | 0.01  | 0.50 | 0.03  | .979              | -0.97               | 1.00                | 0.00    |
| TE        | ← | Others          | 0.18  | 0.40 | 0.46  | .647              | -0.60               | 0.97                | 0.02    |
| TE        | ← | Gender_1        | 0.24  | 0.49 | 0.49  | .626              | -0.72               | 1.20                | 0.06    |
| TE        | ← | Gender_2        | 0.36  | 0.49 | 0.74  | .458              | -0.60               | 1.33                | 0.09    |
| TE        | ← | Education_1     | 0.24  | 0.30 | 0.80  | .425              | -0.35               | 0.83                | 0.03    |
| TE        | ← | Education_2     | 0.42  | 0.21 | 2.03  | .043*             | 0.01                | 0.83                | 0.08    |
| TE        | ← | Education_3     | -0.54 | 0.23 | -2.38 | .017*             | -0.99               | -0.10               | -0.09   |
| TE        | ← | Education_4     | 0.07  | 0.18 | 0.40  | .689              | -0.28               | 0.42                | 0.02    |
| TE        | ← | Age             | 0.00  | 0.01 | 0.47  | .636              | -0.01               | 0.01                | 0.02    |
| TE        | ← | Religion        | 0.16  | 0.04 | 4.08  | <.001***          | 0.09                | 0.24                | 0.13    |
| TE        | ← | Conservatism    | -0.11 | 0.06 | -1.92 | .055 <sup>†</sup> | -0.22               | 0.00                | -0.06   |

*Note.* Enter notes. \*\*\* =  $p < .001$ , \*\* =  $p < .01$ , \* =  $p < .05$ , <sup>†</sup> =  $p < .10$

Table 51

*Prediction of epistemically transformative experiences (fully sober participants only)*

| Criterion |   | Predictor       | b     | SE   | z     | p                 | $CI_{lower}^{95\%}$ | $CI_{upper}^{95\%}$ | $\beta$ |
|-----------|---|-----------------|-------|------|-------|-------------------|---------------------|---------------------|---------|
| ETE       | ← | Psychedelics    | 0.40  | 0.18 | 2.27  | .023*             | 0.05                | 0.74                | 0.08    |
| ETE       | ← | Nicotine        | 0.14  | 0.15 | 0.93  | .352              | -0.15               | 0.42                | 0.03    |
| ETE       | ← | Alcohol         | -1.06 | 0.15 | -6.86 | <.001***          | -1.36               | -0.75               | -0.23   |
| ETE       | ← | Stimulants      | 0.34  | 0.20 | 1.74  | .083 <sup>†</sup> | -0.04               | 0.73                | 0.07    |
| ETE       | ← | Euphorics       | 0.23  | 0.18 | 1.23  | .219              | -0.14               | 0.59                | 0.05    |
| ETE       | ← | Cannabinoids    | 0.24  | 0.14 | 1.68  | .093 <sup>†</sup> | -0.04               | 0.52                | 0.06    |
| ETE       | ← | Benzodiazepines | -0.12 | 0.42 | -0.30 | .764              | -0.94               | 0.69                | -0.01   |
| ETE       | ← | Inhalants       | -0.28 | 0.29 | -0.96 | .337              | -0.85               | 0.29                | -0.03   |
| ETE       | ← | Narcotics       | 0.18  | 0.47 | 0.38  | .701              | -0.74               | 1.10                | 0.01    |
| ETE       | ← | Others          | 0.63  | 0.38 | 1.66  | .096 <sup>†</sup> | -0.11               | 1.37                | 0.06    |
| ETE       | ← | Gender_1        | 0.04  | 0.46 | 0.09  | .928              | -0.87               | 0.95                | 0.01    |
| ETE       | ← | Gender_2        | 0.08  | 0.46 | 0.17  | .864              | -0.83               | 0.99                | 0.02    |
| ETE       | ← | Education_1     | 0.62  | 0.29 | 2.14  | .032*             | 0.05                | 1.18                | 0.08    |
| ETE       | ← | Education_2     | 0.14  | 0.20 | 0.68  | .495              | -0.25               | 0.53                | 0.03    |
| ETE       | ← | Education_3     | -0.14 | 0.22 | -0.64 | .523              | -0.56               | 0.29                | -0.02   |
| ETE       | ← | Education_4     | 0.09  | 0.17 | 0.53  | .598              | -0.24               | 0.42                | 0.02    |
| ETE       | ← | Age             | 0.00  | 0.01 | 0.63  | .526              | -0.01               | 0.01                | 0.02    |
| ETE       | ← | Religion        | 0.15  | 0.04 | 3.96  | <.001***          | 0.08                | 0.23                | 0.13    |
| ETE       | ← | Conservatism    | -0.13 | 0.05 | -2.36 | .018*             | -0.23               | -0.02               | -0.08   |

*Note.* Enter notes. \*\*\* =  $p < .001$ , \*\* =  $p < .01$ , \* =  $p < .05$ , <sup>†</sup> =  $p < .10$

Table 52

*Prediction of transformative experiences, controlling for expectations and desires (fully sober participants only)*

| Criterion | Predictor         | b     | SE   | z     | p                 | $CI_{lower}^{95\%}$ | $CI_{upper}^{95\%}$ | $\beta$ |
|-----------|-------------------|-------|------|-------|-------------------|---------------------|---------------------|---------|
| TE        | ← TE_Desire       | 0.23  | 0.04 | 5.40  | <.001***          | 0.14                | 0.31                | 0.23    |
| TE        | ← TE_Expect       | 0.14  | 0.05 | 3.00  | .003**            | 0.05                | 0.23                | 0.13    |
| TE        | ← Psychedelics    | 0.73  | 0.18 | 4.12  | <.001***          | 0.38                | 1.07                | 0.14    |
| TE        | ← Nicotine        | 0.23  | 0.15 | 1.62  | .106              | -0.05               | 0.52                | 0.05    |
| TE        | ← Alcohol         | -0.62 | 0.15 | -4.09 | <.001***          | -0.92               | -0.33               | -0.13   |
| TE        | ← Stimulants      | 0.19  | 0.20 | 0.96  | .339              | -0.20               | 0.57                | 0.03    |
| TE        | ← Euphorics       | 0.19  | 0.19 | 1.02  | .310              | -0.17               | 0.55                | 0.04    |
| TE        | ← Cannabinoids    | 0.14  | 0.14 | 0.98  | .325              | -0.14               | 0.42                | 0.03    |
| TE        | ← Benzodiazepines | 0.07  | 0.42 | 0.17  | .864              | -0.75               | 0.89                | 0.01    |
| TE        | ← Inhalants       | -0.35 | 0.29 | -1.21 | .224              | -0.91               | 0.21                | -0.04   |
| TE        | ← Narcotics       | 0.06  | 0.48 | 0.12  | .903              | -0.88               | 1.00                | 0.00    |
| TE        | ← Others          | 0.23  | 0.38 | 0.61  | .542              | -0.51               | 0.97                | 0.02    |
| TE        | ← Gender_1        | 0.45  | 0.46 | 0.97  | .332              | -0.46               | 1.36                | 0.11    |
| TE        | ← Gender_2        | 0.57  | 0.46 | 1.23  | .219              | -0.34               | 1.48                | 0.14    |
| TE        | ← Education_1     | 0.32  | 0.28 | 1.12  | .263              | -0.24               | 0.87                | 0.04    |
| TE        | ← Education_2     | 0.54  | 0.20 | 2.74  | .006**            | 0.15                | 0.92                | 0.11    |
| TE        | ← Education_3     | -0.33 | 0.22 | -1.52 | .128              | -0.75               | 0.09                | -0.05   |
| TE        | ← Education_4     | 0.17  | 0.17 | 1.00  | .319              | -0.16               | 0.50                | 0.04    |
| TE        | ← Age             | 0.01  | 0.01 | 1.92  | .055 <sup>†</sup> | 0.00                | 0.02                | 0.06    |
| TE        | ← Religion        | 0.13  | 0.04 | 3.33  | <.001***          | 0.05                | 0.20                | 0.10    |
| TE        | ← Conservatism    | -0.09 | 0.05 | -1.63 | .104              | -0.19               | 0.02                | -0.05   |

*Note.* Enter notes. \*\*\* =  $p < .001$ , \*\* =  $p < .01$ , \* =  $p < .05$ , <sup>†</sup> =  $p < .10$

Table 53

*Prediction of epistemically transformative experiences, controlling for expectations and desires (fully sober participants only)*

| Criterion | Predictor         | b     | SE   | z     | p                 | $CI_{lower}^{95\%}$ | $CI_{upper}^{95\%}$ | $\beta$ |
|-----------|-------------------|-------|------|-------|-------------------|---------------------|---------------------|---------|
| ETE       | ← TE_Desire       | 0.17  | 0.04 | 4.10  | <.001***          | 0.09                | 0.24                | 0.18    |
| ETE       | ← TE_Expect       | 0.09  | 0.04 | 1.97  | .049*             | 0.00                | 0.17                | 0.08    |
| ETE       | ← Psychedelics    | 0.29  | 0.17 | 1.71  | .087 <sup>†</sup> | -0.04               | 0.63                | 0.06    |
| ETE       | ← Nicotine        | 0.14  | 0.14 | 0.96  | .337              | -0.14               | 0.41                | 0.03    |
| ETE       | ← Alcohol         | -0.94 | 0.15 | -6.28 | <.001***          | -1.24               | -0.65               | -0.21   |
| ETE       | ← Stimulants      | 0.32  | 0.19 | 1.66  | .098 <sup>†</sup> | -0.06               | 0.69                | 0.06    |
| ETE       | ← Euphorics       | 0.20  | 0.18 | 1.14  | .255              | -0.15               | 0.56                | 0.04    |
| ETE       | ← Cannabinoids    | 0.12  | 0.14 | 0.83  | .407              | -0.16               | 0.39                | 0.03    |
| ETE       | ← Benzodiazepines | -0.17 | 0.40 | -0.42 | .678              | -0.96               | 0.62                | -0.02   |
| ETE       | ← Inhalants       | -0.29 | 0.28 | -1.02 | .306              | -0.84               | 0.26                | -0.04   |
| ETE       | ← Narcotics       | 0.22  | 0.46 | 0.48  | .631              | -0.68               | 1.12                | 0.02    |
| ETE       | ← Others          | 0.66  | 0.37 | 1.80  | .072 <sup>†</sup> | -0.06               | 1.38                | 0.06    |
| ETE       | ← Gender_1        | 0.18  | 0.45 | 0.41  | .683              | -0.70               | 1.07                | 0.05    |
| ETE       | ← Gender_2        | 0.21  | 0.45 | 0.46  | .644              | -0.68               | 1.09                | 0.05    |
| ETE       | ← Education_1     | 0.66  | 0.28 | 2.37  | .018*             | 0.11                | 1.21                | 0.08    |
| ETE       | ← Education_2     | 0.22  | 0.19 | 1.13  | .260              | -0.16               | 0.60                | 0.05    |
| ETE       | ← Education_3     | 0.01  | 0.21 | 0.05  | .962              | -0.40               | 0.42                | 0.00    |
| ETE       | ← Education_4     | 0.16  | 0.17 | 0.94  | .345              | -0.17               | 0.48                | 0.04    |
| ETE       | ← Age             | 0.01  | 0.01 | 1.60  | .109              | 0.00                | 0.02                | 0.06    |
| ETE       | ← Religion        | 0.13  | 0.04 | 3.47  | <.001***          | 0.06                | 0.20                | 0.11    |
| ETE       | ← Conservatism    | -0.11 | 0.05 | -2.10 | .036*             | -0.21               | -0.01               | -0.07   |

*Note.* Enter notes. \*\*\* =  $p < .001$ , \*\* =  $p < .01$ , \* =  $p < .05$ , † =  $p < .10$

Table 54

*Prediction of social connectedness (fully sober participants only)*

| Criterion   | Predictor         | b     | SE   | z     | p                 | $CI_{lower}^{95\%}$ | $CI_{upper}^{95\%}$ | $\beta$ |
|-------------|-------------------|-------|------|-------|-------------------|---------------------|---------------------|---------|
| Social Con. | ← Psychedelics    | 0.30  | 0.15 | 1.97  | .048*             | 0.00                | 0.59                | 0.08    |
| Social Con. | ← Nicotine        | 0.20  | 0.12 | 1.60  | .109              | -0.04               | 0.44                | 0.06    |
| Social Con. | ← Alcohol         | -0.29 | 0.13 | -2.22 | .026*             | -0.54               | -0.03               | -0.08   |
| Social Con. | ← Stimulants      | -0.08 | 0.17 | -0.49 | .624              | -0.41               | 0.25                | -0.02   |
| Social Con. | ← Euphorics       | 0.01  | 0.16 | 0.07  | .947              | -0.30               | 0.32                | 0.00    |
| Social Con. | ← Cannabinoids    | 0.20  | 0.12 | 1.66  | .098 <sup>†</sup> | -0.04               | 0.44                | 0.06    |
| Social Con. | ← Benzodiazepines | 0.04  | 0.35 | 0.12  | .903              | -0.65               | 0.74                | 0.00    |
| Social Con. | ← Inhalants       | 0.09  | 0.25 | 0.35  | .727              | -0.40               | 0.57                | 0.01    |
| Social Con. | ← Narcotics       | 0.35  | 0.40 | 0.88  | .380              | -0.44               | 1.14                | 0.03    |
| Social Con. | ← Others          | -0.47 | 0.32 | -1.46 | .145              | -1.09               | 0.16                | -0.05   |
| Social Con. | ← Gender_1        | -0.10 | 0.42 | -0.23 | .815              | -0.92               | 0.72                | -0.03   |
| Social Con. | ← Gender_2        | 0.21  | 0.42 | 0.51  | .613              | -0.61               | 1.03                | 0.07    |
| Social Con. | ← Education_1     | -0.03 | 0.24 | -0.12 | .902              | -0.50               | 0.44                | 0.00    |
| Social Con. | ← Education_2     | -0.08 | 0.17 | -0.49 | .624              | -0.41               | 0.24                | -0.02   |
| Social Con. | ← Education_3     | 0.16  | 0.18 | 0.91  | .365              | -0.19               | 0.52                | 0.04    |
| Social Con. | ← Education_4     | -0.13 | 0.14 | -0.93 | .352              | -0.41               | 0.15                | -0.04   |
| Social Con. | ← Age             | 0.01  | 0.00 | 2.64  | .008**            | 0.00                | 0.02                | 0.10    |
| Social Con. | ← Religion        | 0.08  | 0.03 | 2.57  | .010*             | 0.02                | 0.15                | 0.09    |
| Social Con. | ← Conservatism    | -0.01 | 0.05 | -0.15 | .882              | -0.09               | 0.08                | -0.01   |

*Note.* Enter notes. \*\*\* =  $p < .001$ , \*\* =  $p < .01$ , \* =  $p < .05$ , <sup>†</sup> =  $p < .10$

Table 55

*Prediction of mood (fully sober participants only)*

| Criterion | Predictor         | b     | SE   | z     | p                 | $CI_{lower}^{95\%}$ | $CI_{upper}^{95\%}$ | $\beta$ |
|-----------|-------------------|-------|------|-------|-------------------|---------------------|---------------------|---------|
| Mood      | ← Psychedelics    | 0.18  | 0.08 | 2.33  | .020*             | 0.03                | 0.33                | 0.09    |
| Mood      | ← Nicotine        | 0.06  | 0.06 | 1.03  | .305              | -0.06               | 0.19                | 0.04    |
| Mood      | ← Alcohol         | -0.18 | 0.07 | -2.71 | .007**            | -0.31               | -0.05               | -0.10   |
| Mood      | ← Stimulants      | 0.08  | 0.09 | 0.88  | .379              | -0.09               | 0.24                | 0.04    |
| Mood      | ← Euphorics       | -0.10 | 0.08 | -1.26 | .209              | -0.26               | 0.06                | -0.05   |
| Mood      | ← Cannabinoids    | 0.08  | 0.06 | 1.24  | .217              | -0.04               | 0.20                | 0.05    |
| Mood      | ← Benzodiazepines | -0.13 | 0.18 | -0.74 | .457              | -0.49               | 0.22                | -0.03   |
| Mood      | ← Inhalants       | 0.02  | 0.13 | 0.13  | .897              | -0.23               | 0.26                | 0.00    |
| Mood      | ← Narcotics       | -0.02 | 0.20 | -0.12 | .905              | -0.43               | 0.38                | 0.00    |
| Mood      | ← Others          | -0.19 | 0.16 | -1.16 | .244              | -0.51               | 0.13                | -0.04   |
| Mood      | ← Gender_1        | 0.34  | 0.22 | 1.59  | .112              | -0.08               | 0.77                | 0.21    |
| Mood      | ← Gender_2        | 0.43  | 0.22 | 1.98  | .048*             | 0.00                | 0.85                | 0.27    |
| Mood      | ← Education_1     | 0.06  | 0.12 | 0.51  | .610              | -0.18               | 0.31                | 0.02    |
| Mood      | ← Education_2     | -0.15 | 0.09 | -1.73 | .084 <sup>†</sup> | -0.32               | 0.02                | -0.08   |
| Mood      | ← Education_3     | -0.19 | 0.09 | -2.09 | .037*             | -0.38               | -0.01               | -0.08   |
| Mood      | ← Education_4     | -0.12 | 0.07 | -1.65 | .100 <sup>†</sup> | -0.26               | 0.02                | -0.07   |
| Mood      | ← Age             | 0.01  | 0.00 | 2.10  | .036*             | 0.00                | 0.01                | 0.08    |
| Mood      | ← Religion        | 0.00  | 0.02 | 0.05  | .962              | -0.03               | 0.03                | 0.00    |
| Mood      | ← Conservatism    | 0.00  | 0.02 | 0.06  | .956              | -0.04               | 0.05                | 0.00    |

*Note.* Enter notes. \*\*\* =  $p < .001$ , \*\* =  $p < .01$ , \* =  $p < .05$ , <sup>†</sup> =  $p < .10$

Table 56

*Prediction of mood via self-reported transformative experiences (fully sober participants only)*

| Criterion |   | Predictor       | b     | SE   | z     | p        | $CI_{lower}^{95\%}$ | $CI_{upper}^{95\%}$ | $\beta$ |
|-----------|---|-----------------|-------|------|-------|----------|---------------------|---------------------|---------|
| TE        | ← | TE_Desire       | 0.23  | 0.04 | 5.41  | <.001*** | 0.15                | 0.31                | 0.23    |
| TE        | ← | TE_Expect       | 0.14  | 0.05 | 2.99  | .003**   | 0.05                | 0.23                | 0.13    |
| TE        | ← | Psychedelics    | 0.72  | 0.18 | 4.11  | <.001*** | 0.38                | 1.07                | 0.14    |
| TE        | ← | Nicotine        | 0.23  | 0.15 | 1.61  | .108     | -0.05               | 0.52                | 0.05    |
| TE        | ← | Alcohol         | -0.62 | 0.15 | -4.09 | <.001*** | -0.92               | -0.33               | -0.13   |
| TE        | ← | Stimulants      | 0.19  | 0.20 | 0.96  | .338     | -0.20               | 0.57                | 0.03    |
| TE        | ← | Euphorics       | 0.19  | 0.19 | 1.02  | .309     | -0.17               | 0.55                | 0.04    |
| TE        | ← | Cannabinoids    | 0.14  | 0.14 | 0.98  | .327     | -0.14               | 0.42                | 0.03    |
| TE        | ← | Benzodiazepines | 0.07  | 0.42 | 0.18  | .860     | -0.74               | 0.89                | 0.01    |
| TE        | ← | Inhalants       | -0.35 | 0.29 | -1.22 | .223     | -0.92               | 0.21                | -0.04   |
| TE        | ← | Narcotics       | 0.06  | 0.48 | 0.12  | .903     | -0.88               | 0.99                | 0.00    |
| TE        | ← | Others          | 0.23  | 0.38 | 0.61  | .542     | -0.51               | 0.97                | 0.02    |
| TE        | ← | Gender_1        | 0.45  | 0.46 | 0.96  | .336     | -0.46               | 1.36                | 0.11    |
| TE        | ← | Gender_2        | 0.57  | 0.46 | 1.22  | .221     | -0.34               | 1.47                | 0.14    |
| TE        | ← | Education_1     | 0.31  | 0.28 | 1.11  | .268     | -0.24               | 0.87                | 0.04    |
| TE        | ← | Education_2     | 0.53  | 0.20 | 2.71  | .007**   | 0.15                | 0.92                | 0.11    |
| TE        | ← | Education_3     | -0.33 | 0.22 | -1.54 | .123     | -0.76               | 0.09                | -0.06   |
| TE        | ← | Education_4     | 0.16  | 0.17 | 0.97  | .334     | -0.17               | 0.49                | 0.04    |
| TE        | ← | Age             | 0.01  | 0.01 | 1.90  | .057†    | 0.00                | 0.02                | 0.06    |
| TE        | ← | Religion        | 0.13  | 0.04 | 3.31  | <.001*** | 0.05                | 0.20                | 0.10    |
| TE        | ← | Conservatism    | -0.09 | 0.05 | -1.61 | .106     | -0.19               | 0.02                | -0.05   |
| Mood      | ← | TE              | 0.08  | 0.01 | 6.31  | <.001*** | 0.06                | 0.11                | 0.22    |

|          |    |                 |       |      |       |                   |       |       |       |
|----------|----|-----------------|-------|------|-------|-------------------|-------|-------|-------|
| Mood     | ←  | Psychedelics    | 0.10  | 0.08 | 1.36  | .174              | -0.05 | 0.25  | 0.05  |
| Mood     | ←  | Nicotine        | 0.04  | 0.06 | 0.71  | .475              | -0.08 | 0.17  | 0.03  |
| Mood     | ←  | Alcohol         | -0.11 | 0.07 | -1.69 | .092 <sup>†</sup> | -0.24 | 0.02  | -0.06 |
| Mood     | ←  | Stimulants      | 0.06  | 0.08 | 0.66  | .507              | -0.11 | 0.22  | 0.03  |
| Mood     | ←  | Euphorics       | -0.12 | 0.08 | -1.52 | .129              | -0.27 | 0.03  | -0.06 |
| Mood     | ←  | Cannabinoids    | 0.05  | 0.06 | 0.80  | .421              | -0.07 | 0.17  | 0.03  |
| Mood     | ←  | Benzodiazepines | -0.15 | 0.18 | -0.82 | .409              | -0.49 | 0.20  | -0.03 |
| Mood     | ←  | Inhalants       | 0.04  | 0.12 | 0.36  | .717              | -0.20 | 0.29  | 0.01  |
| Mood     | ←  | Narcotics       | -0.02 | 0.20 | -0.12 | .903              | -0.42 | 0.37  | 0.00  |
| Mood     | ←  | Others          | -0.21 | 0.16 | -1.29 | .198              | -0.52 | 0.11  | -0.05 |
| Mood     | ←  | Gender_1        | 0.30  | 0.21 | 1.41  | .160              | -0.12 | 0.71  | 0.19  |
| Mood     | ←  | Gender_2        | 0.37  | 0.21 | 1.75  | .080 <sup>†</sup> | -0.04 | 0.78  | 0.23  |
| Mood     | ←  | Education_1     | 0.04  | 0.12 | 0.29  | .773              | -0.20 | 0.27  | 0.01  |
| Mood     | ←  | Education_2     | -0.19 | 0.08 | -2.21 | .027*             | -0.35 | -0.02 | -0.09 |
| Mood     | ←  | Education_3     | -0.15 | 0.09 | -1.67 | .096 <sup>†</sup> | -0.33 | 0.03  | -0.06 |
| Mood     | ←  | Education_4     | -0.13 | 0.07 | -1.79 | .073 <sup>†</sup> | -0.27 | 0.01  | -0.08 |
| Mood     | ←  | Age             | 0.01  | 0.00 | 2.05  | .040*             | 0.00  | 0.01  | 0.07  |
| Mood     | ←  | Religion        | -0.01 | 0.02 | -0.75 | .454              | -0.04 | 0.02  | -0.03 |
| Mood     | ←  | Conservatism    | 0.01  | 0.02 | 0.47  | .635              | -0.03 | 0.06  | 0.02  |
| Direct   | on | Mood            | -0.11 | 0.07 | -1.69 | .092 <sup>†</sup> | -0.24 | 0.02  | -0.06 |
| Indirect | on | Mood            | -0.05 | 0.02 | -3.43 | <.001***          | -0.08 | -0.02 | -0.03 |
| Total    | on | Mood            | -0.16 | 0.07 | -2.48 | .013*             | -0.29 | -0.03 | -0.09 |

*Note.* Enter notes. \*\*\* =  $p < .001$ , \*\* =  $p < .01$ , \* =  $p < .05$ , † =  $p < .10$

Table 57

*Prediction of mood via social connectedness (fully sober participants only)*

| Criterion   | Predictor         | b     | SE   | z     | p                 | $CI_{lower}^{95\%}$ | $CI_{upper}^{95\%}$ | $\beta$ |
|-------------|-------------------|-------|------|-------|-------------------|---------------------|---------------------|---------|
| Social Con. | ← Psychedelics    | 0.29  | 0.15 | 1.93  | .054 <sup>†</sup> | 0.00                | 0.58                | 0.08    |
| Social Con. | ← Nicotine        | 0.20  | 0.12 | 1.61  | .108              | -0.04               | 0.44                | 0.06    |
| Social Con. | ← Alcohol         | -0.29 | 0.13 | -2.25 | .024*             | -0.54               | -0.04               | -0.08   |
| Social Con. | ← Stimulants      | -0.08 | 0.17 | -0.45 | .654              | -0.40               | 0.25                | -0.02   |
| Social Con. | ← Euphorics       | 0.01  | 0.16 | 0.07  | .946              | -0.30               | 0.32                | 0.00    |
| Social Con. | ← Cannabinoids    | 0.20  | 0.12 | 1.69  | .092 <sup>†</sup> | -0.03               | 0.44                | 0.06    |
| Social Con. | ← Benzodiazepines | 0.05  | 0.35 | 0.13  | .896              | -0.65               | 0.74                | 0.01    |
| Social Con. | ← Inhalants       | 0.08  | 0.25 | 0.31  | .760              | -0.41               | 0.56                | 0.01    |
| Social Con. | ← Narcotics       | 0.35  | 0.40 | 0.88  | .378              | -0.43               | 1.14                | 0.03    |
| Social Con. | ← Others          | -0.47 | 0.32 | -1.46 | .146              | -1.09               | 0.16                | -0.05   |
| Social Con. | ← Gender_1        | -0.13 | 0.42 | -0.31 | .755              | -0.95               | 0.69                | -0.04   |
| Social Con. | ← Gender_2        | 0.18  | 0.42 | 0.42  | .674              | -0.64               | 0.99                | 0.06    |
| Social Con. | ← Education_1     | -0.03 | 0.24 | -0.12 | .903              | -0.50               | 0.44                | 0.00    |
| Social Con. | ← Education_2     | -0.08 | 0.17 | -0.50 | .615              | -0.41               | 0.24                | -0.02   |
| Social Con. | ← Education_3     | 0.16  | 0.18 | 0.90  | .368              | -0.19               | 0.52                | 0.04    |
| Social Con. | ← Education_4     | -0.13 | 0.14 | -0.92 | .357              | -0.41               | 0.15                | -0.04   |
| Social Con. | ← Age             | 0.01  | 0.00 | 2.65  | .008**            | 0.00                | 0.02                | 0.10    |
| Social Con. | ← Religion        | 0.08  | 0.03 | 2.58  | .010**            | 0.02                | 0.15                | 0.09    |
| Social Con. | ← Conservatism    | -0.01 | 0.05 | -0.13 | .894              | -0.09               | 0.08                | 0.00    |
| Mood        | ← Social Con.     | 0.11  | 0.02 | 6.59  | <.001***          | 0.08                | 0.14                | 0.22    |
| Mood        | ← Psychedelics    | 0.15  | 0.07 | 1.95  | .052 <sup>†</sup> | 0.00                | 0.29                | 0.07    |
| Mood        | ← Nicotine        | 0.04  | 0.06 | 0.72  | .473              | -0.08               | 0.17                | 0.03    |
| Mood        | ← Alcohol         | -0.15 | 0.06 | -2.31 | .021*             | -0.28               | -0.02               | -0.08   |

|          |    |                 |       |      |       |                   |       |       |       |
|----------|----|-----------------|-------|------|-------|-------------------|-------|-------|-------|
| Mood     | ←  | Stimulants      | 0.08  | 0.08 | 0.99  | .320              | -0.08 | 0.25  | 0.04  |
| Mood     | ←  | Euphorics       | -0.10 | 0.08 | -1.30 | .193              | -0.26 | 0.05  | -0.05 |
| Mood     | ←  | Cannabinoids    | 0.06  | 0.06 | 0.91  | .364              | -0.06 | 0.17  | 0.03  |
| Mood     | ←  | Benzodiazepines | -0.14 | 0.18 | -0.79 | .427              | -0.49 | 0.21  | -0.03 |
| Mood     | ←  | Inhalants       | 0.01  | 0.12 | 0.07  | .942              | -0.23 | 0.25  | 0.00  |
| Mood     | ←  | Narcotics       | -0.06 | 0.20 | -0.32 | .749              | -0.46 | 0.33  | -0.01 |
| Mood     | ←  | Others          | -0.14 | 0.16 | -0.87 | .382              | -0.46 | 0.17  | -0.03 |
| Mood     | ←  | Gender_1        | 0.34  | 0.21 | 1.58  | .113              | -0.08 | 0.75  | 0.21  |
| Mood     | ←  | Gender_2        | 0.38  | 0.21 | 1.82  | .069 <sup>†</sup> | -0.03 | 0.80  | 0.24  |
| Mood     | ←  | Education_1     | 0.06  | 0.12 | 0.53  | .596              | -0.17 | 0.30  | 0.02  |
| Mood     | ←  | Education_2     | -0.14 | 0.08 | -1.70 | .090 <sup>†</sup> | -0.31 | 0.02  | -0.07 |
| Mood     | ←  | Education_3     | -0.21 | 0.09 | -2.34 | .019 <sup>*</sup> | -0.39 | -0.03 | -0.09 |
| Mood     | ←  | Education_4     | -0.11 | 0.07 | -1.49 | .137              | -0.25 | 0.03  | -0.06 |
| Mood     | ←  | Age             | 0.00  | 0.00 | 1.54  | .124              | 0.00  | 0.01  | 0.06  |
| Mood     | ←  | Religion        | -0.01 | 0.02 | -0.54 | .586              | -0.04 | 0.02  | -0.02 |
| Mood     | ←  | Conservatism    | 0.00  | 0.02 | 0.09  | .931              | -0.04 | 0.05  | 0.00  |
| Indirect | on | Mood            | 0.03  | 0.02 | 1.85  | .064 <sup>†</sup> | 0.00  | 0.07  | 0.02  |
| Direct   | on | Mood            | 0.15  | 0.07 | 1.95  | .052 <sup>†</sup> | 0.00  | 0.29  | 0.07  |
| Total    | on | Mood            | 0.18  | 0.08 | 2.32  | .020 <sup>*</sup> | 0.03  | 0.33  | 0.09  |

*Note.* Enter notes. \*\*\* =  $p < .001$ , \*\* =  $p < .01$ , \* =  $p < .05$ , † =  $p < .10$

Table 58

*Prediction of transformative experiences (24h vs. last week; fully sober participants only)*

| Criterion        | Predictor             | b     | SE   | z     | p                 | $CI_{lower}^{95\%}$ | $CI_{upper}^{95\%}$ | $\beta$ |
|------------------|-----------------------|-------|------|-------|-------------------|---------------------|---------------------|---------|
| TE               | ← Psychedelics (24h)  | 1.13  | 0.21 | 5.48  | <.001***          | 0.73                | 1.54                | 0.19    |
| TE               | ← Psychedelics (week) | 0.40  | 0.27 | 1.50  | .135              | -0.12               | 0.92                | 0.05    |
| TE               | ← Nicotine            | 0.25  | 0.15 | 1.65  | .099 <sup>†</sup> | -0.05               | 0.55                | 0.06    |
| TE               | ← Alcohol             | -0.80 | 0.16 | -4.99 | <.001***          | -1.11               | -0.48               | -0.17   |
| TE               | ← Stimulants          | 0.24  | 0.21 | 1.17  | .240              | -0.16               | 0.65                | 0.04    |
| TE               | ← Euphorics           | 0.25  | 0.20 | 1.27  | .205              | -0.14               | 0.63                | 0.05    |
| TE               | ← Cannabinoids        | 0.29  | 0.15 | 1.95  | .051 <sup>†</sup> | 0.00                | 0.59                | 0.07    |
| TE               | ← Benzodiazepines     | 0.11  | 0.44 | 0.24  | .810              | -0.76               | 0.97                | 0.01    |
| TE               | ← Inhalants           | -0.29 | 0.30 | -0.95 | .342              | -0.89               | 0.31                | -0.03   |
| TE               | ← Narcotics           | 0.09  | 0.50 | 0.18  | .856              | -0.89               | 1.08                | 0.01    |
| TE               | ← Others              | 0.23  | 0.40 | 0.56  | .573              | -0.56               | 1.01                | 0.02    |
| TE               | ← Gender_1            | 0.24  | 0.49 | 0.49  | .621              | -0.72               | 1.20                | 0.06    |
| TE               | ← Gender_2            | 0.36  | 0.49 | 0.73  | .463              | -0.60               | 1.32                | 0.09    |
| TE               | ← Education_1         | 0.15  | 0.30 | 0.48  | .628              | -0.44               | 0.73                | 0.02    |
| TE               | ← Education_2         | 0.39  | 0.21 | 1.87  | .061 <sup>†</sup> | -0.02               | 0.79                | 0.08    |
| TE               | ← Education_3         | -0.57 | 0.23 | -2.52 | .012*             | -1.01               | -0.13               | -0.09   |
| TE               | ← Education_4         | 0.04  | 0.18 | 0.20  | .841              | -0.31               | 0.38                | 0.01    |
| TE               | ← Age                 | 0.00  | 0.01 | 0.61  | .541              | -0.01               | 0.02                | 0.02    |
| TE               | ← Religion            | 0.16  | 0.04 | 4.08  | <.001***          | 0.08                | 0.24                | 0.13    |
| TE               | ← Conservatism        | -0.11 | 0.06 | -1.89 | .059 <sup>†</sup> | -0.22               | 0.00                | -0.06   |
| $\Delta 24/week$ |                       | 0.73  | 0.30 | 2.48  | .013*             | 0.16                | 1.31                | 0.14    |

Note. Enter notes. \*\*\* =  $p < .001$ , \*\* =  $p < .01$ , \* =  $p < .05$ , <sup>†</sup> =  $p < .10$

Table 59

*Prediction of epistemically transformative experiences (24h vs. last week; fully sober participants only)*

| Criterion        | Predictor             | b     | SE   | z     | p                 | $CI_{lower}^{95\%}$ | $CI_{upper}^{95\%}$ | $\beta$ |
|------------------|-----------------------|-------|------|-------|-------------------|---------------------|---------------------|---------|
| ETE              | ← Psychedelics (24h)  | 0.47  | 0.20 | 2.40  | .016*             | 0.09                | 0.85                | 0.08    |
| ETE              | ← Psychedelics (week) | 0.13  | 0.25 | 0.52  | .605              | -0.37               | 0.63                | 0.02    |
| ETE              | ← Nicotine            | 0.14  | 0.15 | 0.96  | .336              | -0.15               | 0.43                | 0.03    |
| ETE              | ← Alcohol             | -1.05 | 0.15 | -6.84 | <.001***          | -1.35               | -0.75               | -0.23   |
| ETE              | ← Stimulants          | 0.35  | 0.20 | 1.78  | .075 <sup>†</sup> | -0.04               | 0.73                | 0.07    |
| ETE              | ← Euphorics           | 0.25  | 0.19 | 1.36  | .172              | -0.11               | 0.62                | 0.05    |
| ETE              | ← Cannabinoids        | 0.24  | 0.14 | 1.69  | .091 <sup>†</sup> | -0.04               | 0.52                | 0.06    |
| ETE              | ← Benzodiazepines     | -0.11 | 0.42 | -0.27 | .783              | -0.93               | 0.70                | -0.01   |
| ETE              | ← Inhalants           | -0.27 | 0.29 | -0.92 | .359              | -0.84               | 0.30                | -0.03   |
| ETE              | ← Narcotics           | 0.23  | 0.47 | 0.49  | .627              | -0.70               | 1.15                | 0.02    |
| ETE              | ← Others              | 0.64  | 0.38 | 1.70  | .088 <sup>†</sup> | -0.10               | 1.38                | 0.06    |
| ETE              | ← Gender_1            | 0.04  | 0.46 | 0.09  | .925              | -0.87               | 0.95                | 0.01    |
| ETE              | ← Gender_2            | 0.08  | 0.46 | 0.17  | .867              | -0.83               | 0.99                | 0.02    |
| ETE              | ← Education_1         | 0.59  | 0.29 | 2.03  | .043*             | 0.02                | 1.15                | 0.07    |
| ETE              | ← Education_2         | 0.12  | 0.20 | 0.62  | .535              | -0.27               | 0.51                | 0.03    |
| ETE              | ← Education_3         | -0.15 | 0.22 | -0.70 | .487              | -0.57               | 0.27                | -0.03   |
| ETE              | ← Education_4         | 0.08  | 0.17 | 0.45  | .652              | -0.26               | 0.41                | 0.02    |
| ETE              | ← Age                 | 0.00  | 0.01 | 0.68  | .495              | -0.01               | 0.02                | 0.02    |
| ETE              | ← Religion            | 0.15  | 0.04 | 3.95  | <.001***          | 0.08                | 0.23                | 0.13    |
| ETE              | ← Conservatism        | -0.12 | 0.05 | -2.35 | .019*             | -0.23               | -0.02               | -0.08   |
| $\Delta 24/week$ |                       | 0.34  | 0.28 | 1.20  | .229              | -0.21               | 0.89                | 0.07    |

Note. Enter notes. \*\*\* =  $p < .001$ , \*\* =  $p < .01$ , \* =  $p < .05$ , † =  $p < .10$

Table 60

*Prediction of transformative experiences, controlling for expectations and desires (24h vs. last week; fully sober participants only)*

| Criterion | Predictor             | b     | SE   | z     | p        | $CI_{lower}^{95\%}$ | $CI_{upper}^{95\%}$ | $\beta$ |
|-----------|-----------------------|-------|------|-------|----------|---------------------|---------------------|---------|
| TE        | ← TE_Desire           | 0.23  | 0.04 | 5.40  | <.001*** | 0.14                | 0.31                | 0.23    |
| TE        | ← TE_Expect           | 0.14  | 0.05 | 2.99  | .003**   | 0.05                | 0.22                | 0.12    |
| TE        | ← Psychedelics (24h)  | 0.95  | 0.20 | 4.87  | <.001*** | 0.57                | 1.34                | 0.16    |
| TE        | ← Psychedelics (week) | 0.30  | 0.25 | 1.19  | .234     | -0.19               | 0.79                | 0.04    |
| TE        | ← Nicotine            | 0.25  | 0.14 | 1.72  | .086†    | -0.04               | 0.53                | 0.06    |
| TE        | ← Alcohol             | -0.62 | 0.15 | -4.09 | <.001*** | -0.92               | -0.32               | -0.13   |
| TE        | ← Stimulants          | 0.20  | 0.20 | 1.01  | .312     | -0.19               | 0.58                | 0.04    |
| TE        | ← Euphorics           | 0.21  | 0.18 | 1.16  | .246     | -0.15               | 0.58                | 0.04    |
| TE        | ← Cannabinoids        | 0.12  | 0.14 | 0.86  | .388     | -0.16               | 0.40                | 0.03    |
| TE        | ← Benzodiazepines     | 0.06  | 0.42 | 0.14  | .892     | -0.76               | 0.87                | 0.00    |
| TE        | ← Inhalants           | -0.33 | 0.29 | -1.13 | .258     | -0.89               | 0.24                | -0.04   |
| TE        | ← Narcotics           | 0.13  | 0.48 | 0.26  | .791     | -0.81               | 1.06                | 0.01    |
| TE        | ← Others              | 0.27  | 0.38 | 0.71  | .478     | -0.47               | 1.01                | 0.02    |
| TE        | ← Gender_1            | 0.45  | 0.46 | 0.98  | .329     | -0.46               | 1.36                | 0.11    |
| TE        | ← Gender_2            | 0.56  | 0.46 | 1.22  | .222     | -0.34               | 1.47                | 0.14    |
| TE        | ← Education_1         | 0.23  | 0.28 | 0.82  | .412     | -0.32               | 0.79                | 0.03    |
| TE        | ← Education_2         | 0.51  | 0.20 | 2.59  | .009**   | 0.12                | 0.89                | 0.10    |
| TE        | ← Education_3         | -0.36 | 0.22 | -1.65 | .098†    | -0.78               | 0.07                | -0.06   |
| TE        | ← Education_4         | 0.14  | 0.17 | 0.81  | .420     | -0.19               | 0.47                | 0.03    |

|                 |   |              |       |      |       |          |       |      |       |
|-----------------|---|--------------|-------|------|-------|----------|-------|------|-------|
| TE              | ← | Age          | 0.01  | 0.01 | 2.05  | .040*    | 0.00  | 0.02 | 0.07  |
| TE              | ← | Religion     | 0.13  | 0.04 | 3.33  | <.001*** | 0.05  | 0.20 | 0.10  |
| TE              | ← | Conservatism | -0.08 | 0.05 | -1.60 | .110     | -0.19 | 0.02 | -0.05 |
| <i>Δ24/week</i> |   |              | 0.66  | 0.28 | 2.35  | .019*    | 0.11  | 1.20 | 0.12  |

---

*Note.* Enter notes. \*\*\* =  $p < .001$ , \*\* =  $p < .01$ , \* =  $p < .05$ , † =  $p < .10$

Table 61

*Prediction of epistemically transformative experiences, controlling for expectations and desires (24h vs. last week; fully sober participants only)*

| Criterion | Predictor             | b     | SE   | z     | p                 | $CI_{lower}^{95\%}$ | $CI_{upper}^{95\%}$ | $\beta$ |
|-----------|-----------------------|-------|------|-------|-------------------|---------------------|---------------------|---------|
| ETE       | ← TE_Desire           | 0.17  | 0.04 | 4.10  | <.001***          | 0.09                | 0.24                | 0.18    |
| ETE       | ← TE_Expect           | 0.09  | 0.04 | 1.97  | .048*             | 0.00                | 0.17                | 0.08    |
| ETE       | ← Psychedelics (24h)  | 0.35  | 0.19 | 1.86  | .063 <sup>†</sup> | -0.02               | 0.73                | 0.06    |
| ETE       | ← Psychedelics (week) | 0.07  | 0.25 | 0.30  | .766              | -0.41               | 0.56                | 0.01    |
| ETE       | ← Nicotine            | 0.14  | 0.14 | 0.99  | .323              | -0.14               | 0.42                | 0.03    |
| ETE       | ← Alcohol             | -0.94 | 0.15 | -6.26 | <.001***          | -1.24               | -0.65               | -0.21   |
| ETE       | ← Stimulants          | 0.32  | 0.19 | 1.69  | .090 <sup>†</sup> | -0.05               | 0.70                | 0.06    |
| ETE       | ← Euphorics           | 0.23  | 0.18 | 1.25  | .210              | -0.13               | 0.58                | 0.05    |
| ETE       | ← Cannabinoids        | 0.12  | 0.14 | 0.84  | .403              | -0.16               | 0.39                | 0.03    |
| ETE       | ← Benzodiazepines     | -0.16 | 0.40 | -0.39 | .694              | -0.95               | 0.63                | -0.01   |
| ETE       | ← Inhalants           | -0.28 | 0.28 | -0.99 | .324              | -0.83               | 0.27                | -0.03   |
| ETE       | ← Narcotics           | 0.26  | 0.46 | 0.57  | .571              | -0.64               | 1.16                | 0.02    |
| ETE       | ← Others              | 0.67  | 0.37 | 1.83  | .067 <sup>†</sup> | -0.05               | 1.39                | 0.06    |
| ETE       | ← Gender_1            | 0.19  | 0.45 | 0.41  | .681              | -0.70               | 1.07                | 0.05    |
| ETE       | ← Gender_2            | 0.21  | 0.45 | 0.46  | .646              | -0.68               | 1.09                | 0.05    |
| ETE       | ← Education_1         | 0.64  | 0.28 | 2.27  | .023*             | 0.09                | 1.19                | 0.08    |
| ETE       | ← Education_2         | 0.21  | 0.19 | 1.08  | .282              | -0.17               | 0.59                | 0.04    |
| ETE       | ← Education_3         | 0.00  | 0.21 | 0.00  | .998              | -0.41               | 0.41                | 0.00    |
| ETE       | ← Education_4         | 0.15  | 0.17 | 0.88  | .378              | -0.18               | 0.47                | 0.04    |
| ETE       | ← Age                 | 0.01  | 0.01 | 1.64  | .100              | 0.00                | 0.02                | 0.06    |
| ETE       | ← Religion            | 0.13  | 0.04 | 3.46  | <.001***          | 0.06                | 0.20                | 0.11    |
| ETE       | ← Conservatism        | -0.11 | 0.05 | -2.09 | .037*             | -0.21               | -0.01               | -0.07   |

|                  |      |      |      |      |       |      |      |
|------------------|------|------|------|------|-------|------|------|
| $\Delta 24/week$ | 0.28 | 0.27 | 1.03 | .305 | -0.26 | 0.82 | 0.05 |
|------------------|------|------|------|------|-------|------|------|

---

*Note.* Enter notes. \*\*\* =  $p < .001$ , \*\* =  $p < .01$ , \* =  $p < .05$ , † =  $p < .10$

Table 62

*Prediction of social connectedness (24h vs. last week; fully sober participants only)*

| Criterion   | Predictor             | b     | SE   | z     | p                 | CI <sub>lower</sub> <sup>95%</sup> | CI <sub>upper</sub> <sup>95%</sup> | $\beta$ |
|-------------|-----------------------|-------|------|-------|-------------------|------------------------------------|------------------------------------|---------|
| Social Con. | ← Psychedelics (24h)  | 0.31  | 0.17 | 1.83  | .067 <sup>†</sup> | -0.02                              | 0.63                               | 0.07    |
| Social Con. | ← Psychedelics (week) | 0.16  | 0.22 | 0.75  | .456              | -0.26                              | 0.58                               | 0.03    |
| Social Con. | ← Nicotine            | 0.20  | 0.12 | 1.62  | .106              | -0.04                              | 0.44                               | 0.06    |
| Social Con. | ← Alcohol             | -0.29 | 0.13 | -2.22 | .026*             | -0.54                              | -0.03                              | -0.08   |
| Social Con. | ← Stimulants          | -0.08 | 0.17 | -0.45 | .653              | -0.40                              | 0.25                               | -0.02   |
| Social Con. | ← Euphorics           | 0.03  | 0.16 | 0.16  | .870              | -0.28                              | 0.33                               | 0.01    |
| Social Con. | ← Cannabinoids        | 0.20  | 0.12 | 1.69  | .091 <sup>†</sup> | -0.03                              | 0.44                               | 0.06    |
| Social Con. | ← Benzodiazepines     | 0.05  | 0.35 | 0.15  | .883              | -0.64                              | 0.74                               | 0.01    |
| Social Con. | ← Inhalants           | 0.09  | 0.25 | 0.37  | .710              | -0.39                              | 0.58                               | 0.01    |
| Social Con. | ← Narcotics           | 0.37  | 0.40 | 0.92  | .357              | -0.42                              | 1.16                               | 0.04    |
| Social Con. | ← Others              | -0.46 | 0.32 | -1.43 | .153              | -1.09                              | 0.17                               | -0.05   |
| Social Con. | ← Gender_1            | -0.10 | 0.42 | -0.23 | .815              | -0.92                              | 0.72                               | -0.03   |
| Social Con. | ← Gender_2            | 0.21  | 0.42 | 0.50  | .618              | -0.61                              | 1.03                               | 0.07    |
| Social Con. | ← Education_1         | -0.05 | 0.24 | -0.20 | .843              | -0.52                              | 0.43                               | -0.01   |
| Social Con. | ← Education_2         | -0.09 | 0.17 | -0.54 | .592              | -0.42                              | 0.24                               | -0.02   |
| Social Con. | ← Education_3         | 0.16  | 0.18 | 0.85  | .393              | -0.20                              | 0.51                               | 0.03    |
| Social Con. | ← Education_4         | -0.14 | 0.14 | -0.98 | .325              | -0.42                              | 0.14                               | -0.04   |
| Social Con. | ← Age                 | 0.01  | 0.00 | 2.65  | .008**            | 0.00                               | 0.02                               | 0.10    |
| Social Con. | ← Religion            | 0.08  | 0.03 | 2.57  | .010*             | 0.02                               | 0.15                               | 0.09    |
| Social Con. | ← Conservatism        | -0.01 | 0.05 | -0.13 | .896              | -0.09                              | 0.08                               | 0.00    |
|             | $\Delta 24/week$      | 0.15  | 0.24 | 0.61  | .542              | -0.32                              | 0.62                               | 0.04    |

Note. Enter notes. \*\*\* =  $p < .001$ , \*\* =  $p < .01$ , \* =  $p < .05$ , † =  $p < .10$

Table 63

*Prediction of mood (24h vs. last week; fully sober participants only)*

| Criterion        | Predictor             | b     | SE   | z     | p                 | $CI_{lower}^{95\%}$ | $CI_{upper}^{95\%}$ | $\beta$ |
|------------------|-----------------------|-------|------|-------|-------------------|---------------------|---------------------|---------|
| Mood             | ← Psychedelics (24h)  | 0.31  | 0.08 | 3.64  | <.001***          | 0.14                | 0.48                | 0.13    |
| Mood             | ← Psychedelics (week) | -0.08 | 0.11 | -0.75 | .455              | -0.29               | 0.13                | -0.03   |
| Mood             | ← Nicotine            | 0.07  | 0.06 | 1.14  | .254              | -0.05               | 0.20                | 0.04    |
| Mood             | ← Alcohol             | -0.18 | 0.07 | -2.67 | .007**            | -0.31               | -0.05               | -0.09   |
| Mood             | ← Stimulants          | 0.08  | 0.08 | 0.99  | .324              | -0.08               | 0.25                | 0.04    |
| Mood             | ← Euphorics           | -0.08 | 0.08 | -1.03 | .305              | -0.24               | 0.07                | -0.04   |
| Mood             | ← Cannabinoids        | 0.07  | 0.06 | 1.10  | .272              | -0.05               | 0.19                | 0.04    |
| Mood             | ← Benzodiazepines     | -0.14 | 0.18 | -0.78 | .438              | -0.49               | 0.21                | -0.03   |
| Mood             | ← Inhalants           | 0.03  | 0.12 | 0.26  | .794              | -0.21               | 0.28                | 0.01    |
| Mood             | ← Narcotics           | 0.02  | 0.20 | 0.12  | .906              | -0.38               | 0.42                | 0.00    |
| Mood             | ← Others              | -0.18 | 0.16 | -1.08 | .280              | -0.50               | 0.14                | -0.04   |
| Mood             | ← Gender_1            | 0.35  | 0.21 | 1.61  | .108              | -0.08               | 0.77                | 0.22    |
| Mood             | ← Gender_2            | 0.43  | 0.21 | 1.99  | .047*             | 0.01                | 0.84                | 0.27    |
| Mood             | ← Education_1         | 0.02  | 0.12 | 0.16  | .872              | -0.22               | 0.26                | 0.01    |
| Mood             | ← Education_2         | -0.16 | 0.09 | -1.91 | .056 <sup>†</sup> | -0.33               | 0.00                | -0.08   |
| Mood             | ← Education_3         | -0.21 | 0.09 | -2.24 | .025*             | -0.39               | -0.03               | -0.09   |
| Mood             | ← Education_4         | -0.14 | 0.07 | -1.89 | .059 <sup>†</sup> | -0.28               | 0.01                | -0.08   |
| Mood             | ← Age                 | 0.01  | 0.00 | 2.28  | .023*             | 0.00                | 0.01                | 0.08    |
| Mood             | ← Religion            | 0.00  | 0.02 | 0.03  | .973              | -0.03               | 0.03                | 0.00    |
| Mood             | ← Conservatism        | 0.00  | 0.02 | 0.08  | .937              | -0.04               | 0.05                | 0.00    |
| $\Delta 24/week$ |                       | 0.39  | 0.12 | 3.22  | .001**            | 0.15                | 0.63                | 0.16    |

Note. Enter notes. \*\*\* =  $p < .001$ , \*\* =  $p < .01$ , \* =  $p < .05$ , <sup>†</sup> =  $p < .10$

Table 64

*Prediction of mood via self-reported transformative experiences (24h vs. last week; fully sober participants only)*

| Criterion |   | Predictor           | b     | SE   | z     | p        | $CI_{lower}^{95\%}$ | $CI_{upper}^{95\%}$ | $\beta$ |
|-----------|---|---------------------|-------|------|-------|----------|---------------------|---------------------|---------|
| TE        | ← | TE_Expect           | 0.14  | 0.05 | 2.98  | .003**   | 0.05                | 0.22                | 0.12    |
| TE        | ← | TE_Desire           | 0.23  | 0.04 | 5.41  | <.001*** | 0.14                | 0.31                | 0.23    |
| TE        | ← | Psychedelics (24h)  | 0.95  | 0.20 | 4.86  | <.001*** | 0.57                | 1.34                | 0.16    |
| TE        | ← | Psychedelics (week) | 0.30  | 0.25 | 1.19  | .234     | -0.19               | 0.79                | 0.04    |
| TE        | ← | Nicotine            | 0.25  | 0.14 | 1.71  | .087†    | -0.04               | 0.53                | 0.06    |
| TE        | ← | Alcohol             | -0.62 | 0.15 | -4.09 | <.001*** | -0.92               | -0.32               | -0.13   |
| TE        | ← | Stimulants          | 0.20  | 0.20 | 1.01  | .310     | -0.19               | 0.58                | 0.04    |
| TE        | ← | Euphorics           | 0.21  | 0.18 | 1.16  | .245     | -0.15               | 0.58                | 0.04    |
| TE        | ← | Cannabinoids        | 0.12  | 0.14 | 0.86  | .390     | -0.16               | 0.40                | 0.03    |
| TE        | ← | Benzodiazepines     | 0.06  | 0.42 | 0.15  | .883     | -0.75               | 0.87                | 0.01    |
| TE        | ← | Inhalants           | -0.33 | 0.29 | -1.14 | .255     | -0.89               | 0.24                | -0.04   |
| TE        | ← | Narcotics           | 0.13  | 0.48 | 0.27  | .785     | -0.80               | 1.07                | 0.01    |
| TE        | ← | Others              | 0.27  | 0.38 | 0.71  | .481     | -0.47               | 1.00                | 0.02    |
| TE        | ← | Gender_1            | 0.45  | 0.46 | 0.97  | .332     | -0.46               | 1.36                | 0.11    |
| TE        | ← | Gender_2            | 0.56  | 0.46 | 1.22  | .224     | -0.34               | 1.47                | 0.14    |
| TE        | ← | Education_1         | 0.23  | 0.28 | 0.81  | .418     | -0.33               | 0.79                | 0.03    |
| TE        | ← | Education_2         | 0.50  | 0.20 | 2.57  | .010*    | 0.12                | 0.89                | 0.10    |
| TE        | ← | Education_3         | -0.36 | 0.22 | -1.67 | .095†    | -0.78               | 0.06                | -0.06   |
| TE        | ← | Education_4         | 0.13  | 0.17 | 0.78  | .437     | -0.20               | 0.46                | 0.03    |
| TE        | ← | Age                 | 0.01  | 0.01 | 2.03  | .042*    | 0.00                | 0.02                | 0.07    |
| TE        | ← | Religion            | 0.13  | 0.04 | 3.32  | <.001*** | 0.05                | 0.20                | 0.10    |
| TE        | ← | Conservatism        | -0.08 | 0.05 | -1.59 | .113     | -0.19               | 0.02                | -0.05   |

|          |    |                     |       |      |       |                   |       |       |       |
|----------|----|---------------------|-------|------|-------|-------------------|-------|-------|-------|
| Mood     | ←  | TE                  | 0.08  | 0.01 | 6.08  | <.001***          | 0.06  | 0.11  | 0.21  |
| Mood     | ←  | Psychedelics (24h)  | 0.22  | 0.08 | 2.57  | .010*             | 0.05  | 0.38  | 0.09  |
| Mood     | ←  | Psychedelics (week) | -0.11 | 0.11 | -1.07 | .286              | -0.32 | 0.10  | -0.04 |
| Mood     | ←  | Nicotine            | 0.05  | 0.06 | 0.82  | .411              | -0.07 | 0.17  | 0.03  |
| Mood     | ←  | Alcohol             | -0.11 | 0.07 | -1.69 | .092 <sup>†</sup> | -0.24 | 0.02  | -0.06 |
| Mood     | ←  | Stimulants          | 0.06  | 0.08 | 0.76  | .445              | -0.10 | 0.23  | 0.03  |
| Mood     | ←  | Euphorics           | -0.10 | 0.08 | -1.31 | .191              | -0.26 | 0.05  | -0.05 |
| Mood     | ←  | Cannabinoids        | 0.04  | 0.06 | 0.70  | .482              | -0.08 | 0.16  | 0.03  |
| Mood     | ←  | Benzodiazepines     | -0.15 | 0.18 | -0.85 | .396              | -0.49 | 0.20  | -0.03 |
| Mood     | ←  | Inhalants           | 0.06  | 0.12 | 0.47  | .637              | -0.18 | 0.30  | 0.02  |
| Mood     | ←  | Narcotics           | 0.02  | 0.20 | 0.09  | .929              | -0.37 | 0.41  | 0.00  |
| Mood     | ←  | Others              | -0.19 | 0.16 | -1.22 | .224              | -0.51 | 0.12  | -0.04 |
| Mood     | ←  | Gender_1            | 0.30  | 0.21 | 1.43  | .153              | -0.11 | 0.71  | 0.19  |
| Mood     | ←  | Gender_2            | 0.37  | 0.21 | 1.77  | .077 <sup>†</sup> | -0.04 | 0.78  | 0.23  |
| Mood     | ←  | Education_1         | 0.00  | 0.12 | 0.00  | .998              | -0.24 | 0.24  | 0.00  |
| Mood     | ←  | Education_2         | -0.20 | 0.08 | -2.35 | .019*             | -0.36 | -0.03 | -0.10 |
| Mood     | ←  | Education_3         | -0.16 | 0.09 | -1.81 | .071 <sup>†</sup> | -0.34 | 0.01  | -0.07 |
| Mood     | ←  | Education_4         | -0.14 | 0.07 | -2.00 | .046*             | -0.28 | 0.00  | -0.09 |
| Mood     | ←  | Age                 | 0.01  | 0.00 | 2.21  | .027*             | 0.00  | 0.01  | 0.08  |
| Mood     | ←  | Religion            | -0.01 | 0.02 | -0.73 | .465              | -0.04 | 0.02  | -0.02 |
| Mood     | ←  | Conservatism        | 0.01  | 0.02 | 0.48  | .634              | -0.03 | 0.05  | 0.02  |
| Direct   | on | Mood                | 0.22  | 0.08 | 2.57  | .010*             | 0.05  | 0.38  | 0.09  |
| Indirect | on | Mood                | 0.08  | 0.02 | 3.80  | <.001***          | 0.04  | 0.12  | 0.03  |
| Total    | on | Mood                | 0.29  | 0.08 | 3.48  | <.001***          | 0.13  | 0.46  | 0.13  |

*Note.* Enter notes. \*\*\* =  $p < .001$ , \*\* =  $p < .01$ , \* =  $p < .05$ , <sup>†</sup> =  $p < .10$

Table 65

*Prediction of mood via social connectedness (24h vs. last week; fully sober participants only)*

| Criterion   | Predictor             | b     | SE   | z     | p                 | $CI_{lower}^{95\%}$ | $CI_{upper}^{95\%}$ | $\beta$ |
|-------------|-----------------------|-------|------|-------|-------------------|---------------------|---------------------|---------|
| Social Con. | ← Psychedelics (24h)  | 0.30  | 0.17 | 1.80  | .072 <sup>†</sup> | -0.03               | 0.63                | 0.07    |
| Social Con. | ← Psychedelics (week) | 0.15  | 0.22 | 0.71  | .476              | -0.27               | 0.58                | 0.03    |
| Social Con. | ← Nicotine            | 0.20  | 0.12 | 1.63  | .104              | -0.04               | 0.44                | 0.06    |
| Social Con. | ← Alcohol             | -0.29 | 0.13 | -2.25 | .024*             | -0.54               | -0.04               | -0.08   |
| Social Con. | ← Stimulants          | -0.07 | 0.17 | -0.41 | .685              | -0.40               | 0.26                | -0.02   |
| Social Con. | ← Euphorics           | 0.03  | 0.16 | 0.17  | .863              | -0.28               | 0.34                | 0.01    |
| Social Con. | ← Cannabinoids        | 0.21  | 0.12 | 1.71  | .087 <sup>†</sup> | -0.03               | 0.44                | 0.07    |
| Social Con. | ← Benzodiazepines     | 0.06  | 0.35 | 0.16  | .874              | -0.64               | 0.75                | 0.01    |
| Social Con. | ← Inhalants           | 0.08  | 0.25 | 0.33  | .740              | -0.40               | 0.56                | 0.01    |
| Social Con. | ← Narcotics           | 0.38  | 0.40 | 0.93  | .351              | -0.41               | 1.17                | 0.04    |
| Social Con. | ← Others              | -0.46 | 0.32 | -1.43 | .151              | -1.09               | 0.17                | -0.05   |
| Social Con. | ← Gender_1            | -0.13 | 0.42 | -0.31 | .758              | -0.95               | 0.69                | -0.04   |
| Social Con. | ← Gender_2            | 0.18  | 0.42 | 0.42  | .674              | -0.64               | 0.99                | 0.06    |
| Social Con. | ← Education_1         | -0.05 | 0.24 | -0.20 | .842              | -0.52               | 0.43                | -0.01   |
| Social Con. | ← Education_2         | -0.09 | 0.17 | -0.55 | .584              | -0.42               | 0.24                | -0.02   |
| Social Con. | ← Education_3         | 0.15  | 0.18 | 0.85  | .394              | -0.20               | 0.51                | 0.03    |
| Social Con. | ← Education_4         | -0.14 | 0.14 | -0.97 | .331              | -0.42               | 0.14                | -0.04   |
| Social Con. | ← Age                 | 0.01  | 0.00 | 2.66  | .008**            | 0.00                | 0.02                | 0.10    |
| Social Con. | ← Religion            | 0.08  | 0.03 | 2.57  | .010*             | 0.02                | 0.15                | 0.09    |
| Social Con. | ← Conservatism        | -0.01 | 0.05 | -0.12 | .904              | -0.09               | 0.08                | 0.00    |
| Mood        | ← Social Con.         | 0.11  | 0.02 | 6.57  | <.001***          | 0.08                | 0.14                | 0.21    |
| Mood        | ← Psychedelics (24h)  | 0.27  | 0.08 | 3.31  | <.001***          | 0.11                | 0.44                | 0.12    |
| Mood        | ← Psychedelics (week) | -0.10 | 0.11 | -0.93 | .353              | -0.31               | 0.11                | -0.03   |

|          |    |                 |       |      |       |                   |       |       |       |
|----------|----|-----------------|-------|------|-------|-------------------|-------|-------|-------|
| Mood     | ←  | Nicotine        | 0.05  | 0.06 | 0.83  | .406              | -0.07 | 0.17  | 0.03  |
| Mood     | ←  | Alcohol         | -0.15 | 0.06 | -2.27 | .023*             | -0.27 | -0.02 | -0.08 |
| Mood     | ←  | Stimulants      | 0.09  | 0.08 | 1.09  | .275              | -0.07 | 0.25  | 0.04  |
| Mood     | ←  | Euphorics       | -0.09 | 0.08 | -1.09 | .276              | -0.24 | 0.07  | -0.04 |
| Mood     | ←  | Cannabinoids    | 0.05  | 0.06 | 0.76  | .445              | -0.07 | 0.16  | 0.03  |
| Mood     | ←  | Benzodiazepines | -0.15 | 0.18 | -0.83 | .405              | -0.49 | 0.20  | -0.03 |
| Mood     | ←  | Inhalants       | 0.02  | 0.12 | 0.20  | .840              | -0.21 | 0.26  | 0.01  |
| Mood     | ←  | Narcotics       | -0.02 | 0.20 | -0.09 | .930              | -0.41 | 0.37  | 0.00  |
| Mood     | ←  | Others          | -0.13 | 0.16 | -0.79 | .428              | -0.44 | 0.19  | -0.03 |
| Mood     | ←  | Gender_1        | 0.34  | 0.21 | 1.61  | .108              | -0.07 | 0.75  | 0.21  |
| Mood     | ←  | Gender_2        | 0.38  | 0.21 | 1.83  | .067 <sup>†</sup> | -0.03 | 0.80  | 0.24  |
| Mood     | ←  | Education_1     | 0.02  | 0.12 | 0.19  | .850              | -0.21 | 0.26  | 0.01  |
| Mood     | ←  | Education_2     | -0.16 | 0.08 | -1.88 | .060 <sup>†</sup> | -0.32 | 0.01  | -0.08 |
| Mood     | ←  | Education_3     | -0.22 | 0.09 | -2.48 | .013*             | -0.40 | -0.05 | -0.10 |
| Mood     | ←  | Education_4     | -0.12 | 0.07 | -1.73 | .084 <sup>†</sup> | -0.26 | 0.02  | -0.08 |
| Mood     | ←  | Age             | 0.00  | 0.00 | 1.72  | .085 <sup>†</sup> | 0.00  | 0.01  | 0.06  |
| Mood     | ←  | Religion        | -0.01 | 0.02 | -0.56 | .578              | -0.04 | 0.02  | -0.02 |
| Mood     | ←  | Conservatism    | 0.00  | 0.02 | 0.11  | .914              | -0.04 | 0.05  | 0.00  |
| Indirect | on | Mood            | 0.03  | 0.02 | 1.74  | .082 <sup>†</sup> | 0.00  | 0.07  | 0.01  |
| Direct   | on | Mood            | 0.27  | 0.08 | 3.31  | <.001***          | 0.11  | 0.44  | 0.12  |
| Total    | on | Mood            | 0.31  | 0.08 | 3.63  | <.001***          | 0.14  | 0.47  | 0.13  |

*Note.* Enter notes. \*\*\* =  $p < .001$ , \*\* =  $p < .01$ , \* =  $p < .05$ , <sup>†</sup> =  $p < .10$

Table 66

*Full structural equation model (fully sober participants only)*

| Criterion | Predictor                | b     | SE   | z     | p                 | $CI_{lower}^{95\%}$ | $CI_{upper}^{95\%}$ | $\beta$ |
|-----------|--------------------------|-------|------|-------|-------------------|---------------------|---------------------|---------|
| TE_Expect | ← Psychedelics (week)    | 0.30  | 0.27 | 1.12  | .264              | -0.23               | 0.84                | 0.04    |
| TE_Expect | ← Nicotine (week)        | 0.23  | 0.29 | 0.81  | .420              | -0.34               | 0.80                | 0.03    |
| TE_Expect | ← Alcohol (week)         | -0.39 | 0.19 | -1.98 | .048*             | -0.77               | 0.00                | -0.08   |
| TE_Expect | ← Stimulants (week)      | 0.10  | 0.29 | 0.36  | .717              | -0.46               | 0.67                | 0.01    |
| TE_Expect | ← Euphorics (week)       | 0.20  | 0.26 | 0.78  | .437              | -0.30               | 0.70                | 0.03    |
| TE_Expect | ← Cannabinoids (week)    | 0.10  | 0.21 | 0.50  | .619              | -0.30               | 0.51                | 0.02    |
| TE_Expect | ← Benzodiazepines (week) | 0.26  | 0.57 | 0.45  | .651              | -0.85               | 1.37                | 0.02    |
| TE_Expect | ← Inhalants (week)       | -0.02 | 0.38 | -0.06 | .954              | -0.77               | 0.73                | 0.00    |
| TE_Expect | ← Narcotics (week)       | -0.08 | 0.60 | -0.14 | .891              | -1.26               | 1.10                | -0.01   |
| TE_Expect | ← Others (week)          | -0.20 | 0.51 | -0.39 | .696              | -1.21               | 0.81                | -0.01   |
| TE_Expect | ← Psychedelics (24h)     | 0.49  | 0.20 | 2.46  | .014*             | 0.10                | 0.89                | 0.09    |
| TE_Expect | ← Nicotine (24h)         | -0.10 | 0.16 | -0.62 | .536              | -0.40               | 0.21                | -0.02   |
| TE_Expect | ← Alcohol (24h)          | -0.26 | 0.15 | -1.76 | .078 <sup>†</sup> | -0.56               | 0.03                | -0.07   |
| TE_Expect | ← Stimulants (24h)       | 0.39  | 0.24 | 1.62  | .106              | -0.08               | 0.85                | 0.06    |
| TE_Expect | ← Euphorics (24h)        | -0.15 | 0.23 | -0.63 | .532              | -0.61               | 0.31                | -0.02   |
| TE_Expect | ← Cannabinoids (24h)     | 0.39  | 0.16 | 2.44  | .015*             | 0.08                | 0.70                | 0.10    |
| TE_Expect | ← Benzodiazepines (24h)  | -0.08 | 0.61 | -0.13 | .894              | -1.27               | 1.11                | 0.00    |
| TE_Expect | ← Inhalants (24h)        | -0.26 | 0.41 | -0.63 | .531              | -1.06               | 0.54                | -0.02   |
| TE_Expect | ← Narcotics (24h)        | 2.11  | 0.79 | 2.65  | .008**            | 0.55                | 3.67                | 0.09    |
| TE_Expect | ← Others (24h)           | -0.54 | 0.54 | -1.00 | .320              | -1.60               | 0.52                | -0.04   |
| TE_Expect | ← Gender_1               | -0.80 | 0.47 | -1.72 | .085 <sup>†</sup> | -1.72               | 0.11                | -0.21   |
| TE_Expect | ← Gender_2               | -0.85 | 0.46 | -1.82 | .069 <sup>†</sup> | -1.76               | 0.07                | -0.22   |
| TE_Expect | ← Education_1            | -0.17 | 0.29 | -0.57 | .570              | -0.73               | 0.40                | -0.02   |

|           |   |                        |       |      |       |          |       |       |       |
|-----------|---|------------------------|-------|------|-------|----------|-------|-------|-------|
| TE_Expect | ← | Education_2            | -0.22 | 0.20 | -1.09 | .277     | -0.61 | 0.18  | -0.05 |
| TE_Expect | ← | Education_3            | -0.51 | 0.22 | -2.27 | .023*    | -0.95 | -0.07 | -0.09 |
| TE_Expect | ← | Education_4            | -0.27 | 0.17 | -1.55 | .121     | -0.61 | 0.07  | -0.07 |
| TE_Expect | ← | Age                    | -0.02 | 0.01 | -3.14 | .002**   | -0.03 | -0.01 | -0.12 |
| TE_Expect | ← | Religion               | 0.10  | 0.04 | 2.64  | .008**   | 0.03  | 0.18  | 0.09  |
| TE_Expect | ← | Conservatism           | 0.00  | 0.05 | -0.04 | .966     | -0.11 | 0.11  | 0.00  |
| TE_Desire | ← | Psychedelics (week)    | 0.27  | 0.29 | 0.91  | .361     | -0.31 | 0.84  | 0.03  |
| TE_Desire | ← | Nicotine (week)        | 0.30  | 0.31 | 0.96  | .337     | -0.31 | 0.91  | 0.03  |
| TE_Desire | ← | Alcohol (week)         | -0.61 | 0.21 | -2.91 | .004**   | -1.02 | -0.20 | -0.11 |
| TE_Desire | ← | Stimulants (week)      | -0.08 | 0.31 | -0.27 | .787     | -0.69 | 0.52  | -0.01 |
| TE_Desire | ← | Euphorics (week)       | 0.40  | 0.28 | 1.46  | .144     | -0.14 | 0.94  | 0.06  |
| TE_Desire | ← | Cannabinoids (week)    | 0.20  | 0.22 | 0.90  | .367     | -0.23 | 0.64  | 0.03  |
| TE_Desire | ← | Benzodiazepines (week) | -0.02 | 0.61 | -0.04 | .970     | -1.22 | 1.17  | 0.00  |
| TE_Desire | ← | Inhalants (week)       | 0.21  | 0.41 | 0.50  | .618     | -0.60 | 1.01  | 0.02  |
| TE_Desire | ← | Narcotics (week)       | -0.83 | 0.65 | -1.29 | .199     | -2.10 | 0.44  | -0.05 |
| TE_Desire | ← | Others (week)          | 0.08  | 0.55 | 0.14  | .892     | -1.01 | 1.16  | 0.00  |
| TE_Desire | ← | Psychedelics (24h)     | 0.45  | 0.22 | 2.09  | .036*    | 0.03  | 0.87  | 0.08  |
| TE_Desire | ← | Nicotine (24h)         | -0.02 | 0.17 | -0.09 | .929     | -0.35 | 0.32  | 0.00  |
| TE_Desire | ← | Alcohol (24h)          | -0.49 | 0.16 | -3.09 | .002**   | -0.81 | -0.18 | -0.12 |
| TE_Desire | ← | Stimulants (24h)       | 0.12  | 0.25 | 0.47  | .635     | -0.38 | 0.62  | 0.02  |
| TE_Desire | ← | Euphorics (24h)        | -0.03 | 0.25 | -0.11 | .914     | -0.52 | 0.47  | 0.00  |
| TE_Desire | ← | Cannabinoids (24h)     | 0.61  | 0.17 | 3.56  | <.001*** | 0.28  | 0.95  | 0.14  |
| TE_Desire | ← | Benzodiazepines (24h)  | 0.91  | 0.65 | 1.39  | .164     | -0.37 | 2.19  | 0.05  |
| TE_Desire | ← | Inhalants (24h)        | -0.10 | 0.44 | -0.23 | .820     | -0.96 | 0.76  | -0.01 |
| TE_Desire | ← | Narcotics (24h)        | 0.09  | 0.85 | 0.10  | .920     | -1.59 | 1.76  | 0.00  |
| TE_Desire | ← | Others (24h)           | -0.52 | 0.58 | -0.89 | .372     | -1.66 | 0.62  | -0.03 |
| TE_Desire | ← | Gender_1               | -0.44 | 0.51 | -0.86 | .389     | -1.44 | 0.56  | -0.11 |

|           |   |                        |       |      |       |                   |       |       |       |
|-----------|---|------------------------|-------|------|-------|-------------------|-------|-------|-------|
| TE_Desire | ← | Gender_2               | -0.43 | 0.51 | -0.85 | .396              | -1.43 | 0.56  | -0.11 |
| TE_Desire | ← | Education_1            | -0.38 | 0.31 | -1.22 | .223              | -1.00 | 0.23  | -0.04 |
| TE_Desire | ← | Education_2            | -0.46 | 0.22 | -2.11 | .035*             | -0.88 | -0.03 | -0.09 |
| TE_Desire | ← | Education_3            | -0.72 | 0.24 | -3.00 | .003**            | -1.20 | -0.25 | -0.12 |
| TE_Desire | ← | Education_4            | -0.33 | 0.19 | -1.74 | .081 <sup>†</sup> | -0.69 | 0.04  | -0.08 |
| TE_Desire | ← | Age                    | -0.03 | 0.01 | -3.94 | <.001***          | -0.04 | -0.01 | -0.14 |
| TE_Desire | ← | Religion               | 0.11  | 0.04 | 2.71  | .007**            | 0.03  | 0.20  | 0.09  |
| TE_Desire | ← | Conservatism           | -0.10 | 0.06 | -1.67 | .096 <sup>†</sup> | -0.21 | 0.02  | -0.06 |
| TE        | ← | TE_Expect              | 0.14  | 0.05 | 2.98  | .003**            | 0.05  | 0.22  | 0.12  |
| TE        | ← | TE_Desire              | 0.23  | 0.04 | 5.42  | <.001***          | 0.15  | 0.31  | 0.23  |
| TE        | ← | Psychedelics (week)    | 0.40  | 0.27 | 1.49  | .136              | -0.12 | 0.92  | 0.05  |
| TE        | ← | Nicotine (week)        | 0.07  | 0.29 | 0.23  | .815              | -0.49 | 0.63  | 0.01  |
| TE        | ← | Alcohol (week)         | -0.28 | 0.19 | -1.48 | .139              | -0.65 | 0.09  | -0.05 |
| TE        | ← | Stimulants (week)      | -0.10 | 0.28 | -0.35 | .725              | -0.65 | 0.45  | -0.01 |
| TE        | ← | Euphorics (week)       | 0.12  | 0.25 | 0.49  | .622              | -0.37 | 0.62  | 0.02  |
| TE        | ← | Cannabinoids (week)    | -0.10 | 0.20 | -0.51 | .612              | -0.49 | 0.29  | -0.02 |
| TE        | ← | Benzodiazepines (week) | -0.15 | 0.56 | -0.27 | .789              | -1.25 | 0.95  | -0.01 |
| TE        | ← | Inhalants (week)       | 0.23  | 0.38 | 0.61  | .542              | -0.51 | 0.97  | 0.02  |
| TE        | ← | Narcotics (week)       | 0.26  | 0.59 | 0.44  | .662              | -0.91 | 1.42  | 0.02  |
| TE        | ← | Others (week)          | -0.05 | 0.51 | -0.10 | .924              | -1.04 | 0.95  | 0.00  |
| TE        | ← | Psychedelics (24h)     | 0.94  | 0.20 | 4.72  | <.001***          | 0.55  | 1.33  | 0.16  |
| TE        | ← | Nicotine (24h)         | 0.31  | 0.15 | 2.05  | .040*             | 0.01  | 0.61  | 0.07  |
| TE        | ← | Alcohol (24h)          | -0.56 | 0.15 | -3.89 | <.001***          | -0.85 | -0.28 | -0.13 |
| TE        | ← | Stimulants (24h)       | 0.35  | 0.23 | 1.50  | .134              | -0.11 | 0.81  | 0.05  |
| TE        | ← | Euphorics (24h)        | 0.28  | 0.23 | 1.23  | .218              | -0.17 | 0.73  | 0.04  |
| TE        | ← | Cannabinoids (24h)     | 0.24  | 0.16 | 1.56  | .120              | -0.06 | 0.55  | 0.05  |
| TE        | ← | Benzodiazepines (24h)  | -0.15 | 0.60 | -0.25 | .799              | -1.33 | 1.03  | -0.01 |

|             |   |                        |       |      |       |                   |       |       |       |
|-------------|---|------------------------|-------|------|-------|-------------------|-------|-------|-------|
| TE          | ← | Inhalants (24h)        | -0.84 | 0.40 | -2.14 | .033*             | -1.62 | -0.07 | -0.07 |
| TE          | ← | Narcotics (24h)        | 0.16  | 0.79 | 0.20  | .842              | -1.39 | 1.70  | 0.01  |
| TE          | ← | Others (24h)           | 0.50  | 0.54 | 0.93  | .354              | -0.55 | 1.55  | 0.03  |
| TE          | ← | Gender_1               | 0.49  | 0.46 | 1.06  | .288              | -0.41 | 1.40  | 0.12  |
| TE          | ← | Gender_2               | 0.60  | 0.46 | 1.30  | .193              | -0.30 | 1.50  | 0.15  |
| TE          | ← | Education_1            | 0.19  | 0.28 | 0.68  | .496              | -0.36 | 0.75  | 0.02  |
| TE          | ← | Education_2            | 0.46  | 0.20 | 2.34  | .019*             | 0.08  | 0.85  | 0.09  |
| TE          | ← | Education_3            | -0.38 | 0.22 | -1.75 | .081 <sup>†</sup> | -0.80 | 0.05  | -0.06 |
| TE          | ← | Education_4            | 0.12  | 0.17 | 0.71  | .479              | -0.21 | 0.45  | 0.03  |
| TE          | ← | Age                    | 0.01  | 0.01 | 2.25  | .024*             | 0.00  | 0.02  | 0.07  |
| TE          | ← | Religion               | 0.13  | 0.04 | 3.29  | <.001***          | 0.05  | 0.20  | 0.10  |
| TE          | ← | Conservatism           | -0.08 | 0.05 | -1.59 | .112              | -0.19 | 0.02  | -0.05 |
| Social Con. | ← | TE                     | 0.09  | 0.03 | 3.46  | <.001***          | 0.04  | 0.14  | 0.12  |
| Social Con. | ← | Psychedelics (week)    | 0.19  | 0.23 | 0.85  | .395              | -0.25 | 0.64  | 0.03  |
| Social Con. | ← | Nicotine (week)        | 0.01  | 0.24 | 0.04  | .968              | -0.46 | 0.48  | 0.00  |
| Social Con. | ← | Alcohol (week)         | -0.43 | 0.16 | -2.69 | .007**            | -0.74 | -0.12 | -0.10 |
| Social Con. | ← | Stimulants (week)      | -0.14 | 0.24 | -0.57 | .568              | -0.60 | 0.33  | -0.02 |
| Social Con. | ← | Euphorics (week)       | 0.01  | 0.21 | 0.04  | .968              | -0.41 | 0.43  | 0.00  |
| Social Con. | ← | Cannabinoids (week)    | 0.38  | 0.17 | 2.23  | .026*             | 0.05  | 0.70  | 0.08  |
| Social Con. | ← | Benzodiazepines (week) | 0.06  | 0.47 | 0.12  | .905              | -0.87 | 0.98  | 0.00  |
| Social Con. | ← | Inhalants (week)       | -0.39 | 0.32 | -1.19 | .234              | -1.02 | 0.25  | -0.05 |
| Social Con. | ← | Narcotics (week)       | 0.41  | 0.50 | 0.82  | .412              | -0.57 | 1.39  | 0.03  |
| Social Con. | ← | Others (week)          | -0.32 | 0.43 | -0.74 | .457              | -1.16 | 0.52  | -0.03 |
| Social Con. | ← | Psychedelics (24h)     | 0.16  | 0.17 | 0.93  | .355              | -0.18 | 0.49  | 0.03  |
| Social Con. | ← | Nicotine (24h)         | 0.21  | 0.13 | 1.63  | .102              | -0.04 | 0.46  | 0.06  |
| Social Con. | ← | Alcohol (24h)          | -0.19 | 0.12 | -1.55 | .121              | -0.43 | 0.05  | -0.06 |
| Social Con. | ← | Stimulants (24h)       | 0.02  | 0.20 | 0.11  | .916              | -0.37 | 0.41  | 0.00  |

|             |   |                        |       |      |       |          |       |      |       |
|-------------|---|------------------------|-------|------|-------|----------|-------|------|-------|
| Social Con. | ← | Euphorics (24h)        | -0.03 | 0.19 | -0.14 | .885     | -0.41 | 0.35 | -0.01 |
| Social Con. | ← | Cannabinoids (24h)     | 0.08  | 0.13 | 0.60  | .551     | -0.18 | 0.34 | 0.02  |
| Social Con. | ← | Benzodiazepines (24h)  | 0.23  | 0.51 | 0.45  | .651     | -0.76 | 1.22 | 0.02  |
| Social Con. | ← | Inhalants (24h)        | 0.66  | 0.33 | 1.97  | .049*    | 0.00  | 1.31 | 0.07  |
| Social Con. | ← | Narcotics (24h)        | 0.30  | 0.66 | 0.45  | .652     | -1.00 | 1.59 | 0.02  |
| Social Con. | ← | Others (24h)           | -0.51 | 0.45 | -1.13 | .259     | -1.40 | 0.38 | -0.04 |
| Social Con. | ← | Gender_1               | -0.12 | 0.41 | -0.28 | .776     | -0.93 | 0.69 | -0.04 |
| Social Con. | ← | Gender_2               | 0.18  | 0.41 | 0.44  | .663     | -0.63 | 0.99 | 0.06  |
| Social Con. | ← | Education_1            | -0.07 | 0.24 | -0.29 | .773     | -0.54 | 0.40 | -0.01 |
| Social Con. | ← | Education_2            | -0.10 | 0.17 | -0.63 | .528     | -0.43 | 0.22 | -0.03 |
| Social Con. | ← | Education_3            | 0.20  | 0.18 | 1.08  | .279     | -0.16 | 0.55 | 0.04  |
| Social Con. | ← | Education_4            | -0.12 | 0.14 | -0.86 | .389     | -0.40 | 0.16 | -0.04 |
| Social Con. | ← | Age                    | 0.01  | 0.00 | 2.41  | .016*    | 0.00  | 0.02 | 0.09  |
| Social Con. | ← | Religion               | 0.07  | 0.03 | 2.19  | .028*    | 0.01  | 0.13 | 0.07  |
| Social Con. | ← | Conservatism           | 0.00  | 0.04 | 0.06  | .952     | -0.09 | 0.09 | 0.00  |
| Mood        | ← | TE                     | 0.07  | 0.01 | 5.44  | <.001*** | 0.05  | 0.10 | 0.18  |
| Mood        | ← | Social Con.            | 0.10  | 0.02 | 6.02  | <.001*** | 0.07  | 0.13 | 0.19  |
| Mood        | ← | Psychedelics (week)    | -0.12 | 0.11 | -1.07 | .286     | -0.34 | 0.10 | -0.04 |
| Mood        | ← | Nicotine (week)        | 0.19  | 0.12 | 1.56  | .118     | -0.05 | 0.42 | 0.06  |
| Mood        | ← | Alcohol (week)         | -0.12 | 0.08 | -1.46 | .145     | -0.27 | 0.04 | -0.05 |
| Mood        | ← | Stimulants (week)      | 0.04  | 0.12 | 0.36  | .717     | -0.19 | 0.27 | 0.01  |
| Mood        | ← | Euphorics (week)       | -0.17 | 0.11 | -1.60 | .110     | -0.37 | 0.04 | -0.06 |
| Mood        | ← | Cannabinoids (week)    | 0.03  | 0.08 | 0.36  | .719     | -0.13 | 0.19 | 0.01  |
| Mood        | ← | Benzodiazepines (week) | -0.27 | 0.23 | -1.14 | .254     | -0.72 | 0.19 | -0.04 |
| Mood        | ← | Inhalants (week)       | 0.11  | 0.16 | 0.72  | .472     | -0.20 | 0.42 | 0.03  |
| Mood        | ← | Narcotics (week)       | -0.07 | 0.25 | -0.29 | .769     | -0.55 | 0.41 | -0.01 |
| Mood        | ← | Others (week)          | 0.06  | 0.21 | 0.29  | .771     | -0.35 | 0.48 | 0.01  |

|          |    |                       |       |      |       |                   |       |       |       |
|----------|----|-----------------------|-------|------|-------|-------------------|-------|-------|-------|
| Mood     | ←  | Psychedelics (24h)    | 0.18  | 0.08 | 2.15  | .031*             | 0.02  | 0.35  | 0.08  |
| Mood     | ←  | Nicotine (24h)        | -0.01 | 0.06 | -0.19 | .848              | -0.14 | 0.11  | -0.01 |
| Mood     | ←  | Alcohol (24h)         | -0.07 | 0.06 | -1.18 | .237              | -0.19 | 0.05  | -0.04 |
| Mood     | ←  | Stimulants (24h)      | 0.08  | 0.10 | 0.86  | .388              | -0.11 | 0.27  | 0.03  |
| Mood     | ←  | Euphorics (24h)       | -0.06 | 0.10 | -0.67 | .502              | -0.25 | 0.12  | -0.02 |
| Mood     | ←  | Cannabinoids (24h)    | 0.07  | 0.07 | 1.08  | .281              | -0.06 | 0.20  | 0.04  |
| Mood     | ←  | Benzodiazepines (24h) | -0.01 | 0.25 | -0.03 | .974              | -0.50 | 0.49  | 0.00  |
| Mood     | ←  | Inhalants (24h)       | -0.05 | 0.17 | -0.30 | .766              | -0.37 | 0.28  | -0.01 |
| Mood     | ←  | Narcotics (24h)       | 0.10  | 0.33 | 0.32  | .751              | -0.54 | 0.75  | 0.01  |
| Mood     | ←  | Others (24h)          | -0.40 | 0.23 | -1.78 | .075 <sup>†</sup> | -0.84 | 0.04  | -0.06 |
| Mood     | ←  | Gender_1              | 0.28  | 0.21 | 1.37  | .169              | -0.12 | 0.69  | 0.18  |
| Mood     | ←  | Gender_2              | 0.33  | 0.21 | 1.59  | .112              | -0.08 | 0.73  | 0.20  |
| Mood     | ←  | Education_1           | 0.00  | 0.12 | 0.01  | .990              | -0.23 | 0.24  | 0.00  |
| Mood     | ←  | Education_2           | -0.19 | 0.08 | -2.36 | .018*             | -0.36 | -0.03 | -0.10 |
| Mood     | ←  | Education_3           | -0.19 | 0.09 | -2.18 | .029*             | -0.37 | -0.02 | -0.08 |
| Mood     | ←  | Education_4           | -0.14 | 0.07 | -1.99 | .046*             | -0.28 | 0.00  | -0.09 |
| Mood     | ←  | Age                   | 0.00  | 0.00 | 1.78  | .075 <sup>†</sup> | 0.00  | 0.01  | 0.06  |
| Mood     | ←  | Religion              | -0.02 | 0.02 | -1.18 | .238              | -0.05 | 0.01  | -0.04 |
| Mood     | ←  | Conservatism          | 0.01  | 0.02 | 0.46  | .649              | -0.03 | 0.05  | 0.02  |
| Indirect | on | Mood via TE           | 0.07  | 0.02 | 3.57  | <.001***          | 0.03  | 0.10  | 0.03  |
| Indirect | on | Mood via Soc.Con.     | 0.02  | 0.02 | 0.92  | .360              | -0.02 | 0.05  | 0.01  |
| Indirect | on | Mood via both         | 0.01  | 0.00 | 2.54  | .011*             | 0.00  | 0.02  | 0.00  |
| Indirect | on | Mood (all)            | 0.09  | 0.03 | 3.48  | <.001***          | 0.04  | 0.14  | 0.04  |
| Direct   | on | Mood                  | 0.18  | 0.08 | 2.15  | .031*             | 0.02  | 0.35  | 0.08  |
| Total    | on | Mood                  | 0.27  | 0.09 | 3.18  | .001**            | 0.10  | 0.44  | 0.12  |

*Note.* Enter notes. \*\*\* =  $p < .001$ , \*\* =  $p < .01$ , \* =  $p < .05$ , <sup>†</sup> =  $p < .10$

**Analyses including “number of days at the event” covariate**

The following tables display the results presented in the main document including “number of days at the event” as an additional (non-preregistered) covariate.

Table 67

*Prediction of transformative experiences (controlling for number of days at the event)*

| Criterion | Predictor         | b     | SE   | z     | p        | $CI_{lower}^{95\%}$ | $CI_{upper}^{95\%}$ | $\beta$ |
|-----------|-------------------|-------|------|-------|----------|---------------------|---------------------|---------|
| TE        | ← Psychedelics    | 0.69  | 0.15 | 4.55  | <.001*** | 0.39                | 0.99                | 0.15    |
| TE        | ← Nicotine        | 0.18  | 0.13 | 1.40  | .161     | -0.07               | 0.43                | 0.04    |
| TE        | ← Alcohol         | -0.71 | 0.15 | -4.82 | <.001*** | -1.00               | -0.42               | -0.14   |
| TE        | ← Stimulants      | 0.29  | 0.16 | 1.77  | .077†    | -0.03               | 0.61                | 0.06    |
| TE        | ← Euphorics       | 0.14  | 0.16 | 0.85  | .393     | -0.18               | 0.45                | 0.03    |
| TE        | ← Cannabinoids    | 0.27  | 0.13 | 2.08  | .038*    | 0.02                | 0.52                | 0.06    |
| TE        | ← Benzodiazepines | 0.15  | 0.34 | 0.45  | .655     | -0.51               | 0.82                | 0.02    |
| TE        | ← Inhalants       | -0.33 | 0.25 | -1.33 | .183     | -0.82               | 0.16                | -0.04   |
| TE        | ← Narcotics       | -0.11 | 0.42 | -0.26 | .792     | -0.92               | 0.71                | -0.01   |
| TE        | ← Others          | 0.31  | 0.26 | 1.19  | .233     | -0.20               | 0.81                | 0.03    |
| TE        | ← Gender_1        | 0.11  | 0.42 | 0.26  | .793     | -0.72               | 0.94                | 0.03    |
| TE        | ← Gender_2        | 0.19  | 0.42 | 0.45  | .650     | -0.63               | 1.02                | 0.05    |
| TE        | ← Education_1     | 0.18  | 0.26 | 0.69  | .490     | -0.33               | 0.69                | 0.02    |
| TE        | ← Education_2     | 0.28  | 0.18 | 1.53  | .125     | -0.08               | 0.63                | 0.06    |
| TE        | ← Education_3     | -0.42 | 0.20 | -2.16 | .031*    | -0.81               | -0.04               | -0.07   |
| TE        | ← Education_4     | -0.01 | 0.16 | -0.06 | .951     | -0.32               | 0.30                | 0.00    |
| TE        | ← Age             | -0.01 | 0.01 | -1.12 | .264     | -0.02               | 0.00                | -0.03   |
| TE        | ← Religion        | 0.15  | 0.03 | 4.32  | <.001*** | 0.08                | 0.22                | 0.12    |
| TE        | ← Conservatism    | -0.08 | 0.05 | -1.71 | .087†    | -0.18               | 0.01                | -0.05   |
| TE        | ← Days            | 0.20  | 0.03 | 6.05  | <.001*** | 0.13                | 0.26                | 0.17    |

*Note.* Enter notes. \*\*\* =  $p < .001$ , \*\* =  $p < .01$ , \* =  $p < .05$ , † =  $p < .10$

Table 68

*Prediction of epistemically transformative experiences (controlling for number of days at the event)*

| Criterion |   | Predictor       | b     | SE   | z     | p                 | $CI_{lower}^{95\%}$ | $CI_{upper}^{95\%}$ | $\beta$ |
|-----------|---|-----------------|-------|------|-------|-------------------|---------------------|---------------------|---------|
| ETE       | ← | Psychedelics    | 0.40  | 0.15 | 2.71  | .007**            | 0.11                | 0.68                | 0.09    |
| ETE       | ← | Nicotine        | 0.08  | 0.12 | 0.68  | .496              | -0.16               | 0.33                | 0.02    |
| ETE       | ← | Alcohol         | -0.85 | 0.15 | -5.87 | <.001***          | -1.14               | -0.57               | -0.17   |
| ETE       | ← | Stimulants      | 0.41  | 0.16 | 2.59  | .010**            | 0.10                | 0.73                | 0.09    |
| ETE       | ← | Euphorics       | 0.07  | 0.15 | 0.44  | .658              | -0.23               | 0.37                | 0.01    |
| ETE       | ← | Cannabinoids    | 0.25  | 0.12 | 1.99  | .046*             | 0.00                | 0.49                | 0.06    |
| ETE       | ← | Benzodiazepines | -0.13 | 0.33 | -0.39 | .698              | -0.77               | 0.52                | -0.01   |
| ETE       | ← | Inhalants       | -0.40 | 0.24 | -1.66 | .098 <sup>†</sup> | -0.87               | 0.07                | -0.05   |
| ETE       | ← | Narcotics       | 0.15  | 0.40 | 0.37  | .713              | -0.64               | 0.93                | 0.01    |
| ETE       | ← | Others          | 0.67  | 0.25 | 2.70  | .007**            | 0.18                | 1.16                | 0.08    |
| ETE       | ← | Gender_1        | 0.17  | 0.41 | 0.41  | .680              | -0.64               | 0.97                | 0.04    |
| ETE       | ← | Gender_2        | 0.10  | 0.41 | 0.24  | .812              | -0.71               | 0.90                | 0.02    |
| ETE       | ← | Education_1     | 0.53  | 0.26 | 2.08  | .038*             | 0.03                | 1.04                | 0.07    |
| ETE       | ← | Education_2     | 0.19  | 0.18 | 1.07  | .283              | -0.16               | 0.54                | 0.04    |
| ETE       | ← | Education_3     | -0.11 | 0.19 | -0.58 | .564              | -0.49               | 0.27                | -0.02   |
| ETE       | ← | Education_4     | 0.03  | 0.16 | 0.22  | .823              | -0.27               | 0.34                | 0.01    |
| ETE       | ← | Age             | 0.00  | 0.01 | -0.84 | .400              | -0.02               | 0.01                | -0.03   |
| ETE       | ← | Religion        | 0.14  | 0.03 | 4.20  | <.001***          | 0.08                | 0.21                | 0.12    |
| ETE       | ← | Conservatism    | -0.11 | 0.05 | -2.30 | .022*             | -0.20               | -0.02               | -0.07   |
| ETE       | ← | Days            | 0.14  | 0.03 | 4.45  | <.001***          | 0.08                | 0.20                | 0.13    |

*Note.* Enter notes. \*\*\* =  $p < .001$ , \*\* =  $p < .01$ , \* =  $p < .05$ , <sup>†</sup> =  $p < .10$

Table 69

*Prediction of transformative experiences, controlling for expectations and desires  
(controlling for number of days at the event)*

| Criterion |   | Predictor       | b     | SE   | z     | p        | $CI_{lower}^{95\%}$ | $CI_{upper}^{95\%}$ | $\beta$ |
|-----------|---|-----------------|-------|------|-------|----------|---------------------|---------------------|---------|
| TE        | ← | TE_Desire       | 0.22  | 0.04 | 6.09  | <.001*** | 0.15                | 0.29                | 0.22    |
| TE        | ← | TE_Expect       | 0.17  | 0.04 | 4.46  | <.001*** | 0.10                | 0.24                | 0.16    |
| TE        | ← | Psychedelics    | 0.58  | 0.14 | 4.09  | <.001*** | 0.30                | 0.86                | 0.12    |
| TE        | ← | Nicotine        | 0.20  | 0.12 | 1.66  | .098†    | -0.04               | 0.44                | 0.05    |
| TE        | ← | Alcohol         | -0.55 | 0.14 | -3.91 | <.001*** | -0.82               | -0.27               | -0.11   |
| TE        | ← | Stimulants      | 0.24  | 0.15 | 1.57  | .116     | -0.06               | 0.55                | 0.05    |
| TE        | ← | Euphorics       | 0.09  | 0.15 | 0.60  | .548     | -0.20               | 0.38                | 0.02    |
| TE        | ← | Cannabinoids    | 0.07  | 0.12 | 0.60  | .547     | -0.16               | 0.31                | 0.02    |
| TE        | ← | Benzodiazepines | 0.03  | 0.32 | 0.09  | .925     | -0.59               | 0.65                | 0.00    |
| TE        | ← | Inhalants       | -0.39 | 0.23 | -1.66 | .096†    | -0.84               | 0.07                | -0.05   |
| TE        | ← | Narcotics       | -0.02 | 0.39 | -0.05 | .962     | -0.78               | 0.75                | 0.00    |
| TE        | ← | Others          | 0.31  | 0.24 | 1.31  | .191     | -0.16               | 0.78                | 0.04    |
| TE        | ← | Gender_1        | 0.29  | 0.40 | 0.72  | .470     | -0.49               | 1.07                | 0.07    |
| TE        | ← | Gender_2        | 0.38  | 0.40 | 0.95  | .342     | -0.40               | 1.15                | 0.09    |
| TE        | ← | Education_1     | 0.26  | 0.25 | 1.08  | .281     | -0.22               | 0.75                | 0.03    |
| TE        | ← | Education_2     | 0.40  | 0.17 | 2.37  | .018*    | 0.07                | 0.74                | 0.08    |
| TE        | ← | Education_3     | -0.25 | 0.18 | -1.35 | .177     | -0.61               | 0.11                | -0.04   |
| TE        | ← | Education_4     | 0.13  | 0.15 | 0.84  | .398     | -0.17               | 0.42                | 0.03    |
| TE        | ← | Age             | 0.00  | 0.01 | 0.59  | .554     | -0.01               | 0.01                | 0.02    |
| TE        | ← | Religion        | 0.10  | 0.03 | 2.97  | .003**   | 0.03                | 0.16                | 0.08    |
| TE        | ← | Conservatism    | -0.06 | 0.05 | -1.20 | .229     | -0.15               | 0.03                | -0.03   |

|    |   |      |      |      |      |          |      |      |      |
|----|---|------|------|------|------|----------|------|------|------|
| TE | ← | Days | 0.19 | 0.03 | 6.02 | <.001*** | 0.13 | 0.25 | 0.16 |
|----|---|------|------|------|------|----------|------|------|------|

---

*Note.* Enter notes. \*\*\* =  $p < .001$ , \*\* =  $p < .01$ , \* =  $p < .05$ , † =  $p < .10$

Table 70

*Prediction of epistemically transformative experiences, controlling for expectations and desires (controlling for number of days at the event)*

| Criterion |   | Predictor       | b     | SE   | z     | p        | $CI_{lower}^{95\%}$ | $CI_{upper}^{95\%}$ | $\beta$ |
|-----------|---|-----------------|-------|------|-------|----------|---------------------|---------------------|---------|
| ETE       | ← | TE_Desire       | 0.17  | 0.03 | 4.82  | <.001*** | 0.10                | 0.24                | 0.18    |
| ETE       | ← | TE_Expect       | 0.11  | 0.04 | 2.91  | .004**   | 0.04                | 0.18                | 0.10    |
| ETE       | ← | Psychedelics    | 0.32  | 0.14 | 2.24  | .025*    | 0.04                | 0.60                | 0.07    |
| ETE       | ← | Nicotine        | 0.10  | 0.12 | 0.84  | .398     | -0.13               | 0.34                | 0.02    |
| ETE       | ← | Alcohol         | -0.74 | 0.14 | -5.28 | <.001*** | -1.02               | -0.47               | -0.15   |
| ETE       | ← | Stimulants      | 0.38  | 0.15 | 2.46  | .014*    | 0.08                | 0.68                | 0.08    |
| ETE       | ← | Euphorics       | 0.04  | 0.15 | 0.26  | .794     | -0.25               | 0.33                | 0.01    |
| ETE       | ← | Cannabinoids    | 0.11  | 0.12 | 0.88  | .378     | -0.13               | 0.35                | 0.03    |
| ETE       | ← | Benzodiazepines | -0.22 | 0.32 | -0.68 | .496     | -0.84               | 0.41                | -0.02   |
| ETE       | ← | Inhalants       | -0.44 | 0.23 | -1.89 | .059†    | -0.90               | 0.02                | -0.06   |
| ETE       | ← | Narcotics       | 0.21  | 0.39 | 0.55  | .584     | -0.55               | 0.97                | 0.02    |
| ETE       | ← | Others          | 0.68  | 0.24 | 2.80  | .005**   | 0.20                | 1.15                | 0.08    |
| ETE       | ← | Gender_1        | 0.29  | 0.40 | 0.74  | .461     | -0.49               | 1.07                | 0.07    |
| ETE       | ← | Gender_2        | 0.22  | 0.40 | 0.56  | .579     | -0.56               | 1.00                | 0.06    |
| ETE       | ← | Education_1     | 0.59  | 0.25 | 2.36  | .018*    | 0.10                | 1.07                | 0.07    |
| ETE       | ← | Education_2     | 0.28  | 0.17 | 1.64  | .102     | -0.06               | 0.62                | 0.06    |
| ETE       | ← | Education_3     | 0.01  | 0.19 | 0.05  | .958     | -0.35               | 0.37                | 0.00    |
| ETE       | ← | Education_4     | 0.13  | 0.15 | 0.85  | .394     | -0.17               | 0.42                | 0.03    |
| ETE       | ← | Age             | 0.00  | 0.01 | 0.33  | .738     | -0.01               | 0.01                | 0.01    |
| ETE       | ← | Religion        | 0.10  | 0.03 | 3.18  | .001**   | 0.04                | 0.17                | 0.09    |
| ETE       | ← | Conservatism    | -0.08 | 0.05 | -1.84 | .066†    | -0.17               | 0.01                | -0.05   |
| ETE       | ← | Days            | 0.13  | 0.03 | 4.36  | <.001*** | 0.07                | 0.19                | 0.12    |

*Note.* Enter notes. \*\*\* =  $p < .001$ , \*\* =  $p < .01$ , \* =  $p < .05$ , † =  $p < .10$

Table 71

*Prediction of social connectedness (controlling for number of days at the event)*

| Criterion   | Predictor         | b     | SE   | z     | p                 | $CI_{lower}^{95\%}$ | $CI_{upper}^{95\%}$ | $\beta$ |
|-------------|-------------------|-------|------|-------|-------------------|---------------------|---------------------|---------|
| Social Con. | ← Psychedelics    | 0.38  | 0.12 | 3.06  | .002**            | 0.13                | 0.62                | 0.11    |
| Social Con. | ← Nicotine        | 0.11  | 0.10 | 1.09  | .275              | -0.09               | 0.32                | 0.03    |
| Social Con. | ← Alcohol         | -0.19 | 0.12 | -1.59 | .111              | -0.43               | 0.04                | -0.05   |
| Social Con. | ← Stimulants      | -0.06 | 0.13 | -0.48 | .631              | -0.33               | 0.20                | -0.02   |
| Social Con. | ← Euphorics       | 0.12  | 0.13 | 0.97  | .331              | -0.13               | 0.38                | 0.03    |
| Social Con. | ← Cannabinoids    | 0.17  | 0.10 | 1.65  | .098 <sup>†</sup> | -0.03               | 0.38                | 0.05    |
| Social Con. | ← Benzodiazepines | -0.17 | 0.27 | -0.63 | .529              | -0.71               | 0.36                | -0.02   |
| Social Con. | ← Inhalants       | -0.06 | 0.20 | -0.30 | .761              | -0.46               | 0.33                | -0.01   |
| Social Con. | ← Narcotics       | 0.31  | 0.34 | 0.91  | .361              | -0.35               | 0.96                | 0.03    |
| Social Con. | ← Others          | -0.06 | 0.21 | -0.31 | .759              | -0.47               | 0.34                | -0.01   |
| Social Con. | ← Gender_1        | -0.36 | 0.36 | -1.00 | .317              | -1.06               | 0.34                | -0.11   |
| Social Con. | ← Gender_2        | -0.06 | 0.36 | -0.18 | .861              | -0.76               | 0.64                | -0.02   |
| Social Con. | ← Education_1     | -0.06 | 0.21 | -0.30 | .761              | -0.48               | 0.35                | -0.01   |
| Social Con. | ← Education_2     | -0.06 | 0.15 | -0.41 | .681              | -0.35               | 0.23                | -0.02   |
| Social Con. | ← Education_3     | 0.05  | 0.16 | 0.32  | .753              | -0.26               | 0.36                | 0.01    |
| Social Con. | ← Education_4     | -0.15 | 0.13 | -1.14 | .255              | -0.40               | 0.11                | -0.05   |
| Social Con. | ← Age             | 0.01  | 0.00 | 2.41  | .016*             | 0.00                | 0.02                | 0.08    |
| Social Con. | ← Religion        | 0.08  | 0.03 | 2.76  | .006**            | 0.02                | 0.13                | 0.08    |
| Social Con. | ← Conservatism    | 0.03  | 0.04 | 0.64  | .525              | -0.05               | 0.10                | 0.02    |
| Social Con. | ← Days            | -0.04 | 0.03 | -1.70 | .090 <sup>†</sup> | -0.10               | 0.01                | -0.05   |

Note. Enter notes. \*\*\* =  $p < .001$ , \*\* =  $p < .01$ , \* =  $p < .05$ , <sup>†</sup> =  $p < .10$

Table 72

*Prediction of mood (controlling for number of days at the event)*

| Criterion | Predictor         | b     | SE   | z     | p      | $CI_{lower}^{95\%}$ | $CI_{upper}^{95\%}$ | $\beta$ |
|-----------|-------------------|-------|------|-------|--------|---------------------|---------------------|---------|
| Mood      | ← Psychedelics    | 0.16  | 0.06 | 2.66  | .008** | 0.04                | 0.28                | 0.09    |
| Mood      | ← Nicotine        | 0.07  | 0.05 | 1.30  | .192   | -0.03               | 0.17                | 0.04    |
| Mood      | ← Alcohol         | -0.15 | 0.06 | -2.50 | .013*  | -0.27               | -0.03               | -0.08   |
| Mood      | ← Stimulants      | 0.10  | 0.07 | 1.51  | .131   | -0.03               | 0.23                | 0.05    |
| Mood      | ← Euphorics       | 0.00  | 0.06 | 0.02  | .983   | -0.12               | 0.13                | 0.00    |
| Mood      | ← Cannabinoids    | 0.07  | 0.05 | 1.37  | .171   | -0.03               | 0.17                | 0.05    |
| Mood      | ← Benzodiazepines | -0.16 | 0.14 | -1.18 | .237   | -0.43               | 0.11                | -0.04   |
| Mood      | ← Inhalants       | 0.03  | 0.10 | 0.31  | .754   | -0.16               | 0.23                | 0.01    |
| Mood      | ← Narcotics       | -0.15 | 0.17 | -0.88 | .382   | -0.48               | 0.18                | -0.03   |
| Mood      | ← Others          | -0.12 | 0.10 | -1.17 | .244   | -0.32               | 0.08                | -0.04   |
| Mood      | ← Gender_1        | 0.16  | 0.18 | 0.88  | .378   | -0.19               | 0.51                | 0.10    |
| Mood      | ← Gender_2        | 0.22  | 0.18 | 1.25  | .210   | -0.13               | 0.57                | 0.14    |
| Mood      | ← Education_1     | 0.03  | 0.11 | 0.26  | .796   | -0.18               | 0.23                | 0.01    |
| Mood      | ← Education_2     | -0.10 | 0.07 | -1.43 | .154   | -0.25               | 0.04                | -0.06   |
| Mood      | ← Education_3     | -0.13 | 0.08 | -1.59 | .112   | -0.28               | 0.03                | -0.06   |
| Mood      | ← Education_4     | -0.10 | 0.06 | -1.62 | .106   | -0.23               | 0.02                | -0.06   |
| Mood      | ← Age             | 0.01  | 0.00 | 2.90  | .004** | 0.00                | 0.01                | 0.09    |
| Mood      | ← Religion        | 0.01  | 0.01 | 0.58  | .562   | -0.02               | 0.04                | 0.02    |
| Mood      | ← Conservatism    | -0.02 | 0.02 | -0.78 | .437   | -0.05               | 0.02                | -0.02   |
| Mood      | ← Days            | -0.04 | 0.01 | -2.90 | .004** | -0.06               | -0.01               | -0.09   |

*Note.* Enter notes. \*\*\* =  $p < .001$ , \*\* =  $p < .01$ , \* =  $p < .05$ , † =  $p < .10$

Table 73

*Prediction of mood via self-reported transformative experiences (controlling for number of days at the event)*

| Criterion |   | Predictor       | b     | SE   | z     | p                 | $CI_{lower}^{95\%}$ | $CI_{upper}^{95\%}$ | $\beta$ |
|-----------|---|-----------------|-------|------|-------|-------------------|---------------------|---------------------|---------|
| TE        | ← | TE_Desire       | 0.22  | 0.04 | 6.10  | <.001***          | 0.15                | 0.29                | 0.22    |
| TE        | ← | TE_Expect       | 0.17  | 0.04 | 4.45  | <.001***          | 0.09                | 0.24                | 0.16    |
| TE        | ← | Psychedelics    | 0.58  | 0.14 | 4.09  | <.001***          | 0.30                | 0.86                | 0.12    |
| TE        | ← | Nicotine        | 0.20  | 0.12 | 1.63  | .102              | -0.04               | 0.43                | 0.05    |
| TE        | ← | Alcohol         | -0.54 | 0.14 | -3.89 | <.001***          | -0.82               | -0.27               | -0.11   |
| TE        | ← | Stimulants      | 0.24  | 0.15 | 1.57  | .116              | -0.06               | 0.55                | 0.05    |
| TE        | ← | Euphorics       | 0.09  | 0.15 | 0.62  | .532              | -0.20               | 0.39                | 0.02    |
| TE        | ← | Cannabinoids    | 0.07  | 0.12 | 0.59  | .554              | -0.17               | 0.31                | 0.02    |
| TE        | ← | Benzodiazepines | 0.03  | 0.32 | 0.10  | .922              | -0.59               | 0.66                | 0.00    |
| TE        | ← | Inhalants       | -0.39 | 0.23 | -1.67 | .094 <sup>†</sup> | -0.85               | 0.07                | -0.05   |
| TE        | ← | Narcotics       | -0.02 | 0.39 | -0.05 | .961              | -0.78               | 0.75                | 0.00    |
| TE        | ← | Others          | 0.31  | 0.24 | 1.30  | .193              | -0.16               | 0.78                | 0.03    |
| TE        | ← | Gender_1        | 0.28  | 0.40 | 0.72  | .474              | -0.49               | 1.06                | 0.07    |
| TE        | ← | Gender_2        | 0.37  | 0.40 | 0.95  | .344              | -0.40               | 1.15                | 0.09    |
| TE        | ← | Education_1     | 0.26  | 0.25 | 1.08  | .281              | -0.22               | 0.75                | 0.03    |
| TE        | ← | Education_2     | 0.40  | 0.17 | 2.32  | .020*             | 0.06                | 0.73                | 0.08    |
| TE        | ← | Education_3     | -0.26 | 0.18 | -1.38 | .167              | -0.62               | 0.11                | -0.04   |
| TE        | ← | Education_4     | 0.12  | 0.15 | 0.80  | .424              | -0.17               | 0.41                | 0.03    |
| TE        | ← | Age             | 0.00  | 0.01 | 0.56  | .576              | -0.01               | 0.01                | 0.02    |
| TE        | ← | Religion        | 0.10  | 0.03 | 2.97  | .003**            | 0.03                | 0.16                | 0.08    |
| TE        | ← | Conservatism    | -0.06 | 0.05 | -1.20 | .230              | -0.15               | 0.03                | -0.03   |
| TE        | ← | Days            | 0.19  | 0.03 | 6.02  | <.001***          | 0.12                | 0.25                | 0.16    |

|          |    |                 |       |      |       |                   |       |       |       |
|----------|----|-----------------|-------|------|-------|-------------------|-------|-------|-------|
| Mood     | ←  | TE              | 0.09  | 0.01 | 7.73  | <.001***          | 0.07  | 0.11  | 0.23  |
| Mood     | ←  | Psychedelics    | 0.10  | 0.06 | 1.70  | .089 <sup>†</sup> | -0.02 | 0.22  | 0.06  |
| Mood     | ←  | Nicotine        | 0.05  | 0.05 | 1.03  | .305              | -0.05 | 0.15  | 0.03  |
| Mood     | ←  | Alcohol         | -0.09 | 0.06 | -1.46 | .144              | -0.20 | 0.03  | -0.04 |
| Mood     | ←  | Stimulants      | 0.07  | 0.06 | 1.15  | .251              | -0.05 | 0.20  | 0.04  |
| Mood     | ←  | Euphorics       | -0.01 | 0.06 | -0.18 | .858              | -0.13 | 0.11  | -0.01 |
| Mood     | ←  | Cannabinoids    | 0.05  | 0.05 | 0.93  | .352              | -0.05 | 0.15  | 0.03  |
| Mood     | ←  | Benzodiazepines | -0.17 | 0.13 | -1.30 | .194              | -0.44 | 0.09  | -0.05 |
| Mood     | ←  | Inhalants       | 0.06  | 0.10 | 0.63  | .526              | -0.13 | 0.25  | 0.02  |
| Mood     | ←  | Narcotics       | -0.13 | 0.16 | -0.81 | .419              | -0.45 | 0.19  | -0.03 |
| Mood     | ←  | Others          | -0.15 | 0.10 | -1.48 | .138              | -0.35 | 0.05  | -0.04 |
| Mood     | ←  | Gender_1        | 0.13  | 0.17 | 0.77  | .441              | -0.21 | 0.48  | 0.09  |
| Mood     | ←  | Gender_2        | 0.19  | 0.17 | 1.11  | .267              | -0.15 | 0.53  | 0.12  |
| Mood     | ←  | Education_1     | 0.01  | 0.10 | 0.07  | .946              | -0.20 | 0.21  | 0.00  |
| Mood     | ←  | Education_2     | -0.13 | 0.07 | -1.81 | .070 <sup>†</sup> | -0.27 | 0.01  | -0.07 |
| Mood     | ←  | Education_3     | -0.09 | 0.08 | -1.18 | .239              | -0.24 | 0.06  | -0.04 |
| Mood     | ←  | Education_4     | -0.10 | 0.06 | -1.67 | .096 <sup>†</sup> | -0.23 | 0.02  | -0.06 |
| Mood     | ←  | Age             | 0.01  | 0.00 | 3.24  | .001**            | 0.00  | 0.01  | 0.10  |
| Mood     | ←  | Religion        | 0.00  | 0.01 | -0.31 | .755              | -0.03 | 0.02  | -0.01 |
| Mood     | ←  | Conservatism    | -0.01 | 0.02 | -0.40 | .688              | -0.05 | 0.03  | -0.01 |
| Mood     | ←  | Days            | -0.06 | 0.01 | -4.22 | <.001***          | -0.08 | -0.03 | -0.12 |
| Direct   | on | Mood            | 0.10  | 0.06 | 1.70  | .089 <sup>†</sup> | -0.02 | 0.22  | 0.06  |
| Indirect | on | Mood            | 0.05  | 0.01 | 3.61  | <.001***          | 0.02  | 0.08  | 0.03  |
| Total    | on | Mood            | 0.15  | 0.06 | 2.51  | .012*             | 0.03  | 0.27  | 0.09  |

*Note.* Enter notes. \*\*\* =  $p < .001$ , \*\* =  $p < .01$ , \* =  $p < .05$ , <sup>†</sup> =  $p < .10$

Table 74

*Prediction of mood via social connectedness (controlling for number of days at the event)*

| Criterion   | Predictor         | b     | SE   | z     | p                 | $CI_{lower}^{95\%}$ | $CI_{upper}^{95\%}$ | $\beta$ |
|-------------|-------------------|-------|------|-------|-------------------|---------------------|---------------------|---------|
| Social Con. | ← Psychedelics    | 0.37  | 0.12 | 3.03  | .002**            | 0.13                | 0.61                | 0.10    |
| Social Con. | ← Nicotine        | 0.11  | 0.10 | 1.08  | .278              | -0.09               | 0.32                | 0.03    |
| Social Con. | ← Alcohol         | -0.19 | 0.12 | -1.61 | .107              | -0.43               | 0.04                | -0.05   |
| Social Con. | ← Stimulants      | -0.06 | 0.13 | -0.46 | .649              | -0.32               | 0.20                | -0.02   |
| Social Con. | ← Euphorics       | 0.13  | 0.13 | 0.99  | .320              | -0.12               | 0.38                | 0.04    |
| Social Con. | ← Cannabinoids    | 0.18  | 0.10 | 1.68  | .092 <sup>†</sup> | -0.03               | 0.38                | 0.06    |
| Social Con. | ← Benzodiazepines | -0.17 | 0.27 | -0.62 | .533              | -0.71               | 0.37                | -0.02   |
| Social Con. | ← Inhalants       | -0.07 | 0.20 | -0.34 | .732              | -0.46               | 0.33                | -0.01   |
| Social Con. | ← Narcotics       | 0.31  | 0.34 | 0.92  | .360              | -0.35               | 0.96                | 0.03    |
| Social Con. | ← Others          | -0.06 | 0.21 | -0.31 | .755              | -0.47               | 0.34                | -0.01   |
| Social Con. | ← Gender_1        | -0.38 | 0.36 | -1.06 | .290              | -1.07               | 0.32                | -0.12   |
| Social Con. | ← Gender_2        | -0.09 | 0.36 | -0.24 | .810              | -0.78               | 0.61                | -0.03   |
| Social Con. | ← Education_1     | -0.06 | 0.21 | -0.28 | .783              | -0.47               | 0.36                | -0.01   |
| Social Con. | ← Education_2     | -0.06 | 0.15 | -0.42 | .677              | -0.35               | 0.23                | -0.02   |
| Social Con. | ← Education_3     | 0.05  | 0.16 | 0.31  | .753              | -0.26               | 0.36                | 0.01    |
| Social Con. | ← Education_4     | -0.14 | 0.13 | -1.13 | .259              | -0.40               | 0.11                | -0.04   |
| Social Con. | ← Age             | 0.01  | 0.00 | 2.43  | .015*             | 0.00                | 0.02                | 0.08    |
| Social Con. | ← Religion        | 0.08  | 0.03 | 2.78  | .005**            | 0.02                | 0.13                | 0.08    |
| Social Con. | ← Conservatism    | 0.03  | 0.04 | 0.65  | .515              | -0.05               | 0.10                | 0.02    |
| Social Con. | ← Days            | -0.05 | 0.03 | -1.72 | .086 <sup>†</sup> | -0.10               | 0.01                | -0.05   |
| Mood        | ← Social Con.     | 0.11  | 0.01 | 7.91  | <.001***          | 0.08                | 0.14                | 0.22    |
| Mood        | ← Psychedelics    | 0.12  | 0.06 | 1.99  | .047*             | 0.00                | 0.24                | 0.07    |
| Mood        | ← Nicotine        | 0.06  | 0.05 | 1.12  | .262              | -0.04               | 0.16                | 0.03    |

|          |    |                 |       |      |       |                   |       |       |       |
|----------|----|-----------------|-------|------|-------|-------------------|-------|-------|-------|
| Mood     | ←  | Alcohol         | -0.13 | 0.06 | -2.23 | .025*             | -0.24 | -0.02 | -0.07 |
| Mood     | ←  | Stimulants      | 0.11  | 0.06 | 1.66  | .098 <sup>†</sup> | -0.02 | 0.23  | 0.06  |
| Mood     | ←  | Euphorics       | -0.01 | 0.06 | -0.20 | .845              | -0.13 | 0.11  | -0.01 |
| Mood     | ←  | Cannabinoids    | 0.05  | 0.05 | 1.05  | .293              | -0.05 | 0.15  | 0.03  |
| Mood     | ←  | Benzodiazepines | -0.14 | 0.13 | -1.05 | .292              | -0.40 | 0.12  | -0.04 |
| Mood     | ←  | Inhalants       | 0.04  | 0.10 | 0.42  | .675              | -0.15 | 0.23  | 0.01  |
| Mood     | ←  | Narcotics       | -0.18 | 0.16 | -1.07 | .283              | -0.50 | 0.14  | -0.04 |
| Mood     | ←  | Others          | -0.12 | 0.10 | -1.16 | .246              | -0.32 | 0.08  | -0.03 |
| Mood     | ←  | Gender_1        | 0.18  | 0.17 | 1.06  | .290              | -0.16 | 0.53  | 0.12  |
| Mood     | ←  | Gender_2        | 0.22  | 0.17 | 1.25  | .211              | -0.12 | 0.56  | 0.14  |
| Mood     | ←  | Education_1     | 0.03  | 0.10 | 0.31  | .757              | -0.17 | 0.23  | 0.01  |
| Mood     | ←  | Education_2     | -0.10 | 0.07 | -1.41 | .159              | -0.24 | 0.04  | -0.05 |
| Mood     | ←  | Education_3     | -0.13 | 0.08 | -1.71 | .086 <sup>†</sup> | -0.28 | 0.02  | -0.06 |
| Mood     | ←  | Education_4     | -0.09 | 0.06 | -1.42 | .154              | -0.21 | 0.03  | -0.05 |
| Mood     | ←  | Age             | 0.01  | 0.00 | 2.38  | .017*             | 0.00  | 0.01  | 0.08  |
| Mood     | ←  | Religion        | 0.00  | 0.01 | -0.08 | .932              | -0.03 | 0.03  | 0.00  |
| Mood     | ←  | Conservatism    | -0.02 | 0.02 | -0.92 | .360              | -0.06 | 0.02  | -0.03 |
| Mood     | ←  | Days            | -0.03 | 0.01 | -2.56 | .010*             | -0.06 | -0.01 | -0.07 |
| Indirect | on | Mood            | 0.04  | 0.01 | 2.83  | .005**            | 0.01  | 0.07  | 0.02  |
| Direct   | on | Mood            | 0.12  | 0.06 | 1.99  | .047*             | 0.00  | 0.24  | 0.07  |
| Total    | on | Mood            | 0.16  | 0.06 | 2.62  | .009**            | 0.04  | 0.28  | 0.09  |

*Note.* Enter notes. \*\*\* =  $p < .001$ , \*\* =  $p < .01$ , \* =  $p < .05$ , <sup>†</sup> =  $p < .10$

Table 75

*Prediction of transformative experiences (24h vs. last week; controlling for number of days at the event)*

| Criterion        |   | Predictor           | b     | SE   | z     | p                 | $CI_{lower}^{95\%}$ | $CI_{upper}^{95\%}$ | $\beta$ |
|------------------|---|---------------------|-------|------|-------|-------------------|---------------------|---------------------|---------|
| TE               | ← | Psychedelics (24h)  | 0.85  | 0.16 | 5.28  | <.001***          | 0.54                | 1.17                | 0.16    |
| TE               | ← | Psychedelics (week) | 0.14  | 0.22 | 0.64  | .519              | -0.29               | 0.58                | 0.02    |
| TE               | ← | Nicotine            | 0.19  | 0.13 | 1.45  | .146              | -0.06               | 0.44                | 0.04    |
| TE               | ← | Alcohol             | -0.70 | 0.15 | -4.78 | <.001***          | -0.99               | -0.41               | -0.14   |
| TE               | ← | Stimulants          | 0.29  | 0.16 | 1.78  | .075 <sup>†</sup> | -0.03               | 0.61                | 0.06    |
| TE               | ← | Euphorics           | 0.16  | 0.16 | 1.04  | .300              | -0.15               | 0.47                | 0.03    |
| TE               | ← | Cannabinoids        | 0.25  | 0.13 | 1.97  | .049*             | 0.00                | 0.50                | 0.06    |
| TE               | ← | Benzodiazepines     | 0.12  | 0.34 | 0.35  | .727              | -0.55               | 0.78                | 0.01    |
| TE               | ← | Inhalants           | -0.32 | 0.25 | -1.29 | .196              | -0.80               | 0.16                | -0.04   |
| TE               | ← | Narcotics           | -0.07 | 0.41 | -0.17 | .862              | -0.88               | 0.74                | -0.01   |
| TE               | ← | Others              | 0.35  | 0.26 | 1.36  | .173              | -0.15               | 0.85                | 0.04    |
| TE               | ← | Gender_1            | 0.08  | 0.42 | 0.19  | .846              | -0.74               | 0.91                | 0.02    |
| TE               | ← | Gender_2            | 0.16  | 0.42 | 0.37  | .711              | -0.67               | 0.98                | 0.04    |
| TE               | ← | Education_1         | 0.10  | 0.26 | 0.39  | .694              | -0.41               | 0.62                | 0.01    |
| TE               | ← | Education_2         | 0.24  | 0.18 | 1.33  | .183              | -0.11               | 0.60                | 0.05    |
| TE               | ← | Education_3         | -0.47 | 0.20 | -2.37 | .018*             | -0.85               | -0.08               | -0.08   |
| TE               | ← | Education_4         | -0.04 | 0.16 | -0.28 | .780              | -0.36               | 0.27                | -0.01   |
| TE               | ← | Age                 | -0.01 | 0.01 | -1.05 | .295              | -0.02               | 0.01                | -0.03   |
| TE               | ← | Religion            | 0.15  | 0.03 | 4.24  | <.001***          | 0.08                | 0.22                | 0.12    |
| TE               | ← | Conservatism        | -0.08 | 0.05 | -1.70 | .089 <sup>†</sup> | -0.18               | 0.01                | -0.05   |
| TE               | ← | Days                | 0.21  | 0.03 | 6.34  | <.001***          | 0.14                | 0.27                | 0.18    |
| $\Delta 24/week$ |   |                     | 0.71  | 0.24 | 2.96  | .003**            | 0.24                | 1.18                | 0.14    |

Note. Enter notes. \*\*\* =  $p < .001$ , \*\* =  $p < .01$ , \* =  $p < .05$ , † =  $p < .10$

Table 76

*Prediction of epistemically transformative experiences (24h vs. last week; controlling for number of days at the event)*

| Criterion | Predictor             | b     | SE   | z     | p        | $CI_{lower}^{95\%}$ | $CI_{upper}^{95\%}$ | $\beta$ |
|-----------|-----------------------|-------|------|-------|----------|---------------------|---------------------|---------|
| ETE       | ← Psychedelics (24h)  | 0.54  | 0.16 | 3.48  | <.001*** | 0.24                | 0.85                | 0.11    |
| ETE       | ← Psychedelics (week) | -0.04 | 0.21 | -0.21 | .836     | -0.47               | 0.38                | -0.01   |
| ETE       | ← Nicotine            | 0.09  | 0.12 | 0.70  | .486     | -0.16               | 0.33                | 0.02    |
| ETE       | ← Alcohol             | -0.84 | 0.14 | -5.82 | <.001*** | -1.13               | -0.56               | -0.17   |
| ETE       | ← Stimulants          | 0.41  | 0.16 | 2.58  | .010*    | 0.10                | 0.72                | 0.09    |
| ETE       | ← Euphorics           | 0.09  | 0.15 | 0.58  | .564     | -0.21               | 0.39                | 0.02    |
| ETE       | ← Cannabinoids        | 0.24  | 0.12 | 1.92  | .055†    | -0.01               | 0.48                | 0.06    |
| ETE       | ← Benzodiazepines     | -0.15 | 0.33 | -0.46 | .647     | -0.79               | 0.49                | -0.02   |
| ETE       | ← Inhalants           | -0.40 | 0.24 | -1.66 | .096†    | -0.87               | 0.07                | -0.05   |
| ETE       | ← Narcotics           | 0.19  | 0.40 | 0.48  | .632     | -0.59               | 0.97                | 0.02    |
| ETE       | ← Others              | 0.71  | 0.25 | 2.84  | .004**   | 0.22                | 1.20                | 0.08    |
| ETE       | ← Gender_1            | 0.15  | 0.41 | 0.36  | .717     | -0.65               | 0.95                | 0.04    |
| ETE       | ← Gender_2            | 0.07  | 0.41 | 0.18  | .860     | -0.73               | 0.87                | 0.02    |
| ETE       | ← Education_1         | 0.48  | 0.26 | 1.85  | .064†    | -0.03               | 0.98                | 0.06    |
| ETE       | ← Education_2         | 0.16  | 0.18 | 0.92  | .358     | -0.18               | 0.51                | 0.03    |
| ETE       | ← Education_3         | -0.14 | 0.19 | -0.73 | .467     | -0.52               | 0.24                | -0.02   |
| ETE       | ← Education_4         | 0.01  | 0.16 | 0.06  | .952     | -0.29               | 0.31                | 0.00    |
| ETE       | ← Age                 | 0.00  | 0.01 | -0.79 | .431     | -0.01               | 0.01                | -0.02   |
| ETE       | ← Religion            | 0.14  | 0.03 | 4.12  | <.001*** | 0.07                | 0.21                | 0.12    |

|                  |   |              |       |      |       |          |       |       |       |
|------------------|---|--------------|-------|------|-------|----------|-------|-------|-------|
| ETE              | ← | Conservatism | -0.11 | 0.05 | -2.29 | .022*    | -0.20 | -0.02 | -0.07 |
| ETE              | ← | Days         | 0.15  | 0.03 | 4.69  | <.001*** | 0.09  | 0.21  | 0.13  |
| $\Delta 24/week$ |   |              | 0.59  | 0.23 | 2.51  | .012*    | 0.13  | 1.04  | 0.12  |

---

*Note.* Enter notes. \*\*\* =  $p < .001$ , \*\* =  $p < .01$ , \* =  $p < .05$ , † =  $p < .10$

Table 77

*Prediction of transformative experiences, controlling for expectations and desires (24h vs. last week; controlling for number of days at the event)*

| Criterion |   | Predictor           | b     | SE   | z     | p        | $CI_{lower}^{95\%}$ | $CI_{upper}^{95\%}$ | $\beta$ |
|-----------|---|---------------------|-------|------|-------|----------|---------------------|---------------------|---------|
| TE        | ← | TE_Desire           | 0.22  | 0.04 | 6.13  | <.001*** | 0.15                | 0.29                | 0.22    |
| TE        | ← | TE_Expect           | 0.17  | 0.04 | 4.39  | <.001*** | 0.09                | 0.24                | 0.15    |
| TE        | ← | Psychedelics (24h)  | 0.73  | 0.15 | 4.80  | <.001*** | 0.43                | 1.03                | 0.14    |
| TE        | ← | Psychedelics (week) | 0.11  | 0.21 | 0.55  | .581     | -0.29               | 0.52                | 0.02    |
| TE        | ← | Nicotine            | 0.20  | 0.12 | 1.70  | .089†    | -0.03               | 0.44                | 0.05    |
| TE        | ← | Alcohol             | -0.54 | 0.14 | -3.87 | <.001*** | -0.81               | -0.27               | -0.10   |
| TE        | ← | Stimulants          | 0.24  | 0.15 | 1.58  | .114     | -0.06               | 0.55                | 0.05    |
| TE        | ← | Euphorics           | 0.11  | 0.15 | 0.76  | .446     | -0.18               | 0.40                | 0.02    |
| TE        | ← | Cannabinoids        | 0.06  | 0.12 | 0.50  | .620     | -0.18               | 0.30                | 0.01    |
| TE        | ← | Benzodiazepines     | 0.00  | 0.32 | 0.00  | 1.000    | -0.62               | 0.62                | 0.00    |
| TE        | ← | Inhalants           | -0.38 | 0.23 | -1.63 | .103     | -0.83               | 0.08                | -0.05   |
| TE        | ← | Narcotics           | 0.01  | 0.39 | 0.04  | .970     | -0.75               | 0.78                | 0.00    |
| TE        | ← | Others              | 0.35  | 0.24 | 1.46  | .144     | -0.12               | 0.82                | 0.04    |
| TE        | ← | Gender_1            | 0.26  | 0.40 | 0.66  | .511     | -0.52               | 1.04                | 0.06    |
| TE        | ← | Gender_2            | 0.34  | 0.40 | 0.87  | .384     | -0.43               | 1.12                | 0.08    |
| TE        | ← | Education_1         | 0.20  | 0.25 | 0.80  | .423     | -0.28               | 0.68                | 0.02    |
| TE        | ← | Education_2         | 0.37  | 0.17 | 2.18  | .029*    | 0.04                | 0.70                | 0.08    |
| TE        | ← | Education_3         | -0.29 | 0.18 | -1.55 | .120     | -0.65               | 0.08                | -0.05   |
| TE        | ← | Education_4         | 0.10  | 0.15 | 0.64  | .521     | -0.20               | 0.39                | 0.02    |
| TE        | ← | Age                 | 0.00  | 0.01 | 0.65  | .513     | -0.01               | 0.01                | 0.02    |
| TE        | ← | Religion            | 0.10  | 0.03 | 2.90  | .004**   | 0.03                | 0.16                | 0.08    |
| TE        | ← | Conservatism        | -0.05 | 0.05 | -1.19 | .233     | -0.14               | 0.04                | -0.03   |

|                  |   |      |      |      |      |          |      |      |      |
|------------------|---|------|------|------|------|----------|------|------|------|
| TE               | ← | Days | 0.19 | 0.03 | 6.29 | <.001*** | 0.13 | 0.25 | 0.16 |
| $\Delta 24/week$ |   |      | 0.61 | 0.23 | 2.73 | .006**   | 0.17 | 1.06 | 0.12 |

---

*Note.* Enter notes. \*\*\* =  $p < .001$ , \*\* =  $p < .01$ , \* =  $p < .05$ , † =  $p < .10$

Table 78

*Prediction of epistemically transformative experiences, controlling for expectations and desires (24h vs. last week; sober participants only)*

| Criterion |   | Predictor           | b     | SE   | z     | p                 | $CI_{lower}^{95\%}$ | $CI_{upper}^{95\%}$ | $\beta$ |
|-----------|---|---------------------|-------|------|-------|-------------------|---------------------|---------------------|---------|
| ETE       | ← | TE_Desire           | 0.17  | 0.03 | 4.83  | <.001***          | 0.10                | 0.24                | 0.18    |
| ETE       | ← | TE_Expect           | 0.11  | 0.04 | 2.84  | .004**            | 0.03                | 0.18                | 0.10    |
| ETE       | ← | Psychedelics (24h)  | 0.45  | 0.15 | 2.97  | .003**            | 0.15                | 0.75                | 0.09    |
| ETE       | ← | Psychedelics (week) | -0.06 | 0.21 | -0.29 | .771              | -0.47               | 0.35                | -0.01   |
| ETE       | ← | Nicotine            | 0.10  | 0.12 | 0.86  | .390              | -0.13               | 0.34                | 0.03    |
| ETE       | ← | Alcohol             | -0.74 | 0.14 | -5.24 | <.001***          | -1.01               | -0.46               | -0.15   |
| ETE       | ← | Stimulants          | 0.38  | 0.15 | 2.44  | .015*             | 0.07                | 0.68                | 0.08    |
| ETE       | ← | Euphorics           | 0.06  | 0.15 | 0.38  | .706              | -0.23               | 0.35                | 0.01    |
| ETE       | ← | Cannabinoids        | 0.10  | 0.12 | 0.81  | .415              | -0.14               | 0.34                | 0.03    |
| ETE       | ← | Benzodiazepines     | -0.24 | 0.32 | -0.75 | .456              | -0.86               | 0.39                | -0.02   |
| ETE       | ← | Inhalants           | -0.44 | 0.23 | -1.90 | .058 <sup>†</sup> | -0.90               | 0.01                | -0.06   |
| ETE       | ← | Narcotics           | 0.25  | 0.39 | 0.65  | .517              | -0.51               | 1.01                | 0.02    |
| ETE       | ← | Others              | 0.71  | 0.24 | 2.93  | .003**            | 0.23                | 1.18                | 0.08    |
| ETE       | ← | Gender_1            | 0.27  | 0.40 | 0.69  | .489              | -0.50               | 1.05                | 0.07    |
| ETE       | ← | Gender_2            | 0.20  | 0.40 | 0.50  | .618              | -0.58               | 0.97                | 0.05    |
| ETE       | ← | Education_1         | 0.54  | 0.25 | 2.15  | .031*             | 0.05                | 1.02                | 0.07    |
| ETE       | ← | Education_2         | 0.26  | 0.17 | 1.50  | .135              | -0.08               | 0.59                | 0.05    |
| ETE       | ← | Education_3         | -0.02 | 0.19 | -0.08 | .935              | -0.38               | 0.35                | 0.00    |
| ETE       | ← | Education_4         | 0.11  | 0.15 | 0.70  | .483              | -0.19               | 0.40                | 0.03    |
| ETE       | ← | Age                 | 0.00  | 0.01 | 0.38  | .706              | -0.01               | 0.01                | 0.01    |
| ETE       | ← | Religion            | 0.10  | 0.03 | 3.12  | .002**            | 0.04                | 0.17                | 0.08    |
| ETE       | ← | Conservatism        | -0.08 | 0.05 | -1.83 | .067 <sup>†</sup> | -0.17               | 0.01                | -0.05   |

|                  |   |      |      |      |      |          |      |      |      |
|------------------|---|------|------|------|------|----------|------|------|------|
| ETE              | ← | Days | 0.14 | 0.03 | 4.57 | <.001*** | 0.08 | 0.20 | 0.13 |
| $\Delta 24/week$ |   |      | 0.51 | 0.23 | 2.26 | .024*    | 0.07 | 0.95 | 0.10 |

---

*Note.* Enter notes. \*\*\* =  $p < .001$ , \*\* =  $p < .01$ , \* =  $p < .05$ , † =  $p < .10$

Table 79

*Prediction of social connectedness (24h vs. last week; controlling for number of days at the event)*

| Criterion   | Predictor             | b     | SE   | z     | p                 | $CI_{lower}^{95\%}$ | $CI_{upper}^{95\%}$ | $\beta$ |
|-------------|-----------------------|-------|------|-------|-------------------|---------------------|---------------------|---------|
| Social Con. | ← Psychedelics (24h)  | 0.37  | 0.13 | 2.82  | .005**            | 0.11                | 0.63                | 0.09    |
| Social Con. | ← Psychedelics (week) | 0.32  | 0.18 | 1.75  | .080 <sup>†</sup> | -0.04               | 0.67                | 0.05    |
| Social Con. | ← Nicotine            | 0.12  | 0.10 | 1.11  | .266              | -0.09               | 0.32                | 0.04    |
| Social Con. | ← Alcohol             | -0.19 | 0.12 | -1.59 | .112              | -0.43               | 0.04                | -0.05   |
| Social Con. | ← Stimulants          | -0.06 | 0.13 | -0.46 | .646              | -0.32               | 0.20                | -0.02   |
| Social Con. | ← Euphorics           | 0.13  | 0.13 | 1.01  | .312              | -0.12               | 0.38                | 0.04    |
| Social Con. | ← Cannabinoids        | 0.17  | 0.10 | 1.64  | .101              | -0.03               | 0.38                | 0.05    |
| Social Con. | ← Benzodiazepines     | -0.17 | 0.27 | -0.62 | .537              | -0.71               | 0.37                | -0.02   |
| Social Con. | ← Inhalants           | -0.06 | 0.20 | -0.30 | .767              | -0.45               | 0.33                | -0.01   |
| Social Con. | ← Narcotics           | 0.31  | 0.34 | 0.94  | .349              | -0.34               | 0.97                | 0.03    |
| Social Con. | ← Others              | -0.06 | 0.21 | -0.30 | .762              | -0.47               | 0.34                | -0.01   |
| Social Con. | ← Gender_1            | -0.36 | 0.36 | -1.02 | .309              | -1.06               | 0.34                | -0.12   |
| Social Con. | ← Gender_2            | -0.07 | 0.36 | -0.19 | .846              | -0.77               | 0.63                | -0.02   |
| Social Con. | ← Education_1         | -0.07 | 0.21 | -0.33 | .742              | -0.49               | 0.35                | -0.01   |
| Social Con. | ← Education_2         | -0.06 | 0.15 | -0.43 | .665              | -0.35               | 0.22                | -0.02   |
| Social Con. | ← Education_3         | 0.05  | 0.16 | 0.30  | .767              | -0.26               | 0.36                | 0.01    |
| Social Con. | ← Education_4         | -0.15 | 0.13 | -1.15 | .248              | -0.40               | 0.10                | -0.05   |
| Social Con. | ← Age                 | 0.01  | 0.00 | 2.42  | .016*             | 0.00                | 0.02                | 0.08    |
| Social Con. | ← Religion            | 0.08  | 0.03 | 2.75  | .006**            | 0.02                | 0.13                | 0.08    |
| Social Con. | ← Conservatism        | 0.02  | 0.04 | 0.63  | .529              | -0.05               | 0.10                | 0.02    |
| Social Con. | ← Days                | -0.04 | 0.03 | -1.64 | .101              | -0.10               | 0.01                | -0.05   |
|             | $\Delta 24/week$      | 0.05  | 0.20 | 0.27  | .785              | -0.33               | 0.44                | 0.04    |

Note. Enter notes. \*\*\* =  $p < .001$ , \*\* =  $p < .01$ , \* =  $p < .05$ , <sup>†</sup> =  $p < .10$

Table 80

*Prediction of mood (24h vs. last week; controlling for number of days at the event)*

| Criterion        | Predictor             | b     | SE   | z     | p                 | $CI_{lower}^{95\%}$ | $CI_{upper}^{95\%}$ | $\beta$ |
|------------------|-----------------------|-------|------|-------|-------------------|---------------------|---------------------|---------|
| Mood             | ← Psychedelics (24h)  | 0.23  | 0.07 | 3.52  | <.001***          | 0.10                | 0.36                | 0.11    |
| Mood             | ← Psychedelics (week) | -0.02 | 0.09 | -0.21 | .830              | -0.19               | 0.15                | -0.01   |
| Mood             | ← Nicotine            | 0.07  | 0.05 | 1.35  | .178              | -0.03               | 0.17                | 0.04    |
| Mood             | ← Alcohol             | -0.15 | 0.06 | -2.45 | .014*             | -0.26               | -0.03               | -0.07   |
| Mood             | ← Stimulants          | 0.10  | 0.07 | 1.50  | .132              | -0.03               | 0.23                | 0.05    |
| Mood             | ← Euphorics           | 0.01  | 0.06 | 0.15  | .881              | -0.12               | 0.13                | 0.01    |
| Mood             | ← Cannabinoids        | 0.06  | 0.05 | 1.24  | .214              | -0.04               | 0.17                | 0.04    |
| Mood             | ← Benzodiazepines     | -0.17 | 0.14 | -1.26 | .207              | -0.44               | 0.10                | -0.05   |
| Mood             | ← Inhalants           | 0.03  | 0.10 | 0.33  | .744              | -0.16               | 0.23                | 0.01    |
| Mood             | ← Narcotics           | -0.13 | 0.17 | -0.76 | .446              | -0.46               | 0.20                | -0.03   |
| Mood             | ← Others              | -0.11 | 0.10 | -1.04 | .300              | -0.31               | 0.10                | -0.03   |
| Mood             | ← Gender_1            | 0.15  | 0.18 | 0.83  | .409              | -0.20               | 0.50                | 0.09    |
| Mood             | ← Gender_2            | 0.21  | 0.18 | 1.19  | .235              | -0.14               | 0.56                | 0.13    |
| Mood             | ← Education_1         | 0.00  | 0.11 | 0.00  | .996              | -0.21               | 0.21                | 0.00    |
| Mood             | ← Education_2         | -0.12 | 0.07 | -1.59 | .111              | -0.26               | 0.03                | -0.06   |
| Mood             | ← Education_3         | -0.14 | 0.08 | -1.75 | .079 <sup>†</sup> | -0.29               | 0.02                | -0.06   |
| Mood             | ← Education_4         | -0.12 | 0.06 | -1.80 | .072 <sup>†</sup> | -0.24               | 0.01                | -0.07   |
| Mood             | ← Age                 | 0.01  | 0.00 | 2.98  | .003**            | 0.00                | 0.01                | 0.10    |
| Mood             | ← Religion            | 0.01  | 0.01 | 0.50  | .619              | -0.02               | 0.03                | 0.01    |
| Mood             | ← Conservatism        | -0.02 | 0.02 | -0.78 | .438              | -0.05               | 0.02                | -0.02   |
| Mood             | ← Days                | -0.04 | 0.01 | -2.66 | .008**            | -0.06               | -0.01               | -0.08   |
| $\Delta 24/week$ |                       | 0.25  | 0.10 | 2.57  | .010*             | 0.06                | 0.44                | 0.12    |

Note. Enter notes. \*\*\* =  $p < .001$ , \*\* =  $p < .01$ , \* =  $p < .05$ , † =  $p < .10$

Table 81

*Prediction of mood via self-reported transformative experiences (24h vs. last week; controlling for number of days at the event)*

| Criterion | Predictor             | b     | SE   | z     | p        | $CI_{lower}^{95\%}$ | $CI_{upper}^{95\%}$ | $\beta$ |
|-----------|-----------------------|-------|------|-------|----------|---------------------|---------------------|---------|
| TE        | ← TE_Desire           | 0.22  | 0.04 | 6.14  | <.001*** | 0.15                | 0.29                | 0.22    |
| TE        | ← TE_Expect           | 0.17  | 0.04 | 4.38  | <.001*** | 0.09                | 0.24                | 0.15    |
| TE        | ← Psychedelics (24h)  | 0.73  | 0.15 | 4.80  | <.001*** | 0.43                | 1.03                | 0.14    |
| TE        | ← Psychedelics (week) | 0.12  | 0.21 | 0.57  | .568     | -0.29               | 0.52                | 0.02    |
| TE        | ← Nicotine            | 0.20  | 0.12 | 1.68  | .092†    | -0.03               | 0.44                | 0.05    |
| TE        | ← Alcohol             | -0.54 | 0.14 | -3.85 | <.001*** | -0.81               | -0.26               | -0.10   |
| TE        | ← Stimulants          | 0.24  | 0.15 | 1.58  | .115     | -0.06               | 0.54                | 0.05    |
| TE        | ← Euphorics           | 0.12  | 0.15 | 0.78  | .434     | -0.18               | 0.41                | 0.02    |
| TE        | ← Cannabinoids        | 0.06  | 0.12 | 0.48  | .630     | -0.18               | 0.30                | 0.01    |
| TE        | ← Benzodiazepines     | 0.00  | 0.32 | 0.01  | .994     | -0.62               | 0.63                | 0.00    |
| TE        | ← Inhalants           | -0.38 | 0.23 | -1.64 | .100†    | -0.84               | 0.07                | -0.05   |
| TE        | ← Narcotics           | 0.02  | 0.39 | 0.04  | .966     | -0.75               | 0.78                | 0.00    |
| TE        | ← Others              | 0.35  | 0.24 | 1.45  | .146     | -0.12               | 0.82                | 0.04    |
| TE        | ← Gender_1            | 0.26  | 0.40 | 0.65  | .515     | -0.52               | 1.03                | 0.06    |
| TE        | ← Gender_2            | 0.34  | 0.40 | 0.87  | .385     | -0.43               | 1.12                | 0.08    |
| TE        | ← Education_1         | 0.20  | 0.25 | 0.80  | .423     | -0.28               | 0.68                | 0.02    |
| TE        | ← Education_2         | 0.36  | 0.17 | 2.14  | .032*    | 0.03                | 0.70                | 0.07    |
| TE        | ← Education_3         | -0.29 | 0.18 | -1.58 | .115     | -0.65               | 0.07                | -0.05   |
| TE        | ← Education_4         | 0.09  | 0.15 | 0.60  | .549     | -0.20               | 0.38                | 0.02    |

|        |    |                     |       |      |       |                   |       |       |       |
|--------|----|---------------------|-------|------|-------|-------------------|-------|-------|-------|
| TE     | ←  | Age                 | 0.00  | 0.01 | 0.62  | .533              | -0.01 | 0.01  | 0.02  |
| TE     | ←  | Religion            | 0.10  | 0.03 | 2.90  | .004**            | 0.03  | 0.16  | 0.08  |
| TE     | ←  | Conservatism        | -0.05 | 0.05 | -1.19 | .234              | -0.14 | 0.04  | -0.03 |
| TE     | ←  | Days                | 0.19  | 0.03 | 6.29  | <.001***          | 0.13  | 0.25  | 0.16  |
| Mood   | ←  | TE                  | 0.09  | 0.01 | 7.56  | <.001***          | 0.06  | 0.11  | 0.23  |
| Mood   | ←  | Psychedelics (24h)  | 0.16  | 0.06 | 2.42  | .015*             | 0.03  | 0.28  | 0.08  |
| Mood   | ←  | Psychedelics (week) | -0.03 | 0.09 | -0.38 | .702              | -0.20 | 0.14  | -0.01 |
| Mood   | ←  | Nicotine            | 0.05  | 0.05 | 1.06  | .288              | -0.05 | 0.15  | 0.03  |
| Mood   | ←  | Alcohol             | -0.09 | 0.06 | -1.45 | .148              | -0.20 | 0.03  | -0.04 |
| Mood   | ←  | Stimulants          | 0.07  | 0.06 | 1.15  | .252              | -0.05 | 0.20  | 0.04  |
| Mood   | ←  | Euphorics           | -0.01 | 0.06 | -0.08 | .936              | -0.13 | 0.12  | 0.00  |
| Mood   | ←  | Cannabinoids        | 0.04  | 0.05 | 0.84  | .402              | -0.06 | 0.14  | 0.03  |
| Mood   | ←  | Benzodiazepines     | -0.18 | 0.13 | -1.36 | .174              | -0.44 | 0.08  | -0.05 |
| Mood   | ←  | Inhalants           | 0.06  | 0.10 | 0.63  | .526              | -0.13 | 0.25  | 0.02  |
| Mood   | ←  | Narcotics           | -0.12 | 0.16 | -0.72 | .474              | -0.44 | 0.20  | -0.02 |
| Mood   | ←  | Others              | -0.14 | 0.10 | -1.38 | .169              | -0.34 | 0.06  | -0.04 |
| Mood   | ←  | Gender_1            | 0.13  | 0.17 | 0.73  | .464              | -0.21 | 0.47  | 0.08  |
| Mood   | ←  | Gender_2            | 0.19  | 0.17 | 1.07  | .286              | -0.16 | 0.53  | 0.12  |
| Mood   | ←  | Education_1         | -0.01 | 0.10 | -0.12 | .901              | -0.22 | 0.19  | 0.00  |
| Mood   | ←  | Education_2         | -0.14 | 0.07 | -1.93 | .054 <sup>†</sup> | -0.28 | 0.00  | -0.07 |
| Mood   | ←  | Education_3         | -0.10 | 0.08 | -1.31 | .191              | -0.25 | 0.05  | -0.04 |
| Mood   | ←  | Education_4         | -0.11 | 0.06 | -1.80 | .072 <sup>†</sup> | -0.24 | 0.01  | -0.07 |
| Mood   | ←  | Age                 | 0.01  | 0.00 | 3.30  | <.001***          | 0.00  | 0.01  | 0.11  |
| Mood   | ←  | Religion            | 0.00  | 0.01 | -0.36 | .720              | -0.03 | 0.02  | -0.01 |
| Mood   | ←  | Conservatism        | -0.01 | 0.02 | -0.41 | .683              | -0.05 | 0.03  | -0.01 |
| Mood   | ←  | Days                | -0.05 | 0.01 | -4.01 | <.001***          | -0.08 | -0.03 | -0.12 |
| Direct | on | Mood                | 0.16  | 0.06 | 2.42  | .015*             | 0.03  | 0.28  | 0.08  |

|          |    |      |      |      |      |          |      |      |      |
|----------|----|------|------|------|------|----------|------|------|------|
| Indirect | on | Mood | 0.06 | 0.02 | 4.05 | <.001*** | 0.03 | 0.09 | 0.03 |
| Total    | on | Mood | 0.22 | 0.07 | 3.37 | <.001*** | 0.09 | 0.35 | 0.11 |

---

*Note.* Enter notes. \*\*\* =  $p < .001$ , \*\* =  $p < .01$ , \* =  $p < .05$ , † =  $p < .10$

Table 82

*Prediction of mood via social connectedness (24h vs. last week; controlling for number of days at the event)*

| Criterion   | Predictor             | b     | SE   | z     | p                 | $CI_{lower}^{95\%}$ | $CI_{upper}^{95\%}$ | $\beta$ |
|-------------|-----------------------|-------|------|-------|-------------------|---------------------|---------------------|---------|
| Social Con. | ← Psychedelics (24h)  | 0.58  | 0.46 | 1.24  | .216              | -0.34               | 1.49                | 0.11    |
| Social Con. | ← Psychedelics (week) | 0.25  | 0.43 | 0.59  | .557              | -0.60               | 1.11                | 0.05    |
| Social Con. | ← Nicotine            | 0.28  | 0.29 | 0.98  | .329              | -0.28               | 0.85                | 0.08    |
| Social Con. | ← Alcohol             | -0.67 | 0.33 | -2.01 | .044*             | -1.32               | -0.02               | -0.18   |
| Social Con. | ← Stimulants          | 0.01  | 0.37 | 0.04  | .968              | -0.72               | 0.75                | 0.00    |
| Social Con. | ← Euphorics           | 0.23  | 0.36 | 0.64  | .520              | -0.47               | 0.93                | 0.06    |
| Social Con. | ← Cannabinoids        | 0.19  | 0.28 | 0.68  | .499              | -0.37               | 0.75                | 0.06    |
| Social Con. | ← Benzodiazepines     | -1.22 | 1.16 | -1.06 | .290              | -3.49               | 1.04                | -0.12   |
| Social Con. | ← Inhalants           | -0.08 | 0.63 | -0.13 | .896              | -1.32               | 1.15                | -0.01   |
| Social Con. | ← Narcotics           | -0.49 | 1.53 | -0.32 | .751              | -3.49               | 2.52                | -0.03   |
| Social Con. | ← Others              | -1.27 | 0.75 | -1.69 | .090 <sup>†</sup> | -2.73               | 0.20                | -0.14   |
| Social Con. | ← Gender_1            | 0.36  | 0.81 | 0.45  | .656              | -1.23               | 1.96                | 0.12    |
| Social Con. | ← Gender_2            | 0.28  | 0.80 | 0.35  | .730              | -1.30               | 1.85                | 0.09    |
| Social Con. | ← Education_1         | 1.12  | 0.53 | 2.12  | .034*             | 0.09                | 2.16                | 0.18    |
| Social Con. | ← Education_2         | -0.55 | 0.42 | -1.31 | .190              | -1.38               | 0.27                | -0.11   |
| Social Con. | ← Education_3         | -0.34 | 0.48 | -0.71 | .477              | -1.28               | 0.60                | -0.06   |
| Social Con. | ← Education_4         | -0.06 | 0.28 | -0.23 | .822              | -0.62               | 0.49                | -0.02   |
| Social Con. | ← Age                 | 0.00  | 0.01 | -0.25 | .804              | -0.02               | 0.02                | -0.02   |
| Social Con. | ← Religion            | 0.07  | 0.08 | 0.85  | .394              | -0.09               | 0.22                | 0.06    |
| Social Con. | ← Conservatism        | -0.06 | 0.12 | -0.51 | .613              | -0.28               | 0.17                | -0.04   |
| Social Con. | ← Days                | 0.02  | 0.06 | 0.30  | .766              | -0.10               | 0.14                | 0.02    |
| Mood        | ← Social Con.         | 0.07  | 0.03 | 2.09  | .037*             | 0.00                | 0.13                | 0.15    |

|          |    |                     |       |      |       |        |       |      |       |
|----------|----|---------------------|-------|------|-------|--------|-------|------|-------|
| Mood     | ←  | Psychedelics (24h)  | 0.15  | 0.19 | 0.78  | .438   | -0.22 | 0.52 | 0.06  |
| Mood     | ←  | Psychedelics (week) | -0.16 | 0.18 | -0.88 | .381   | -0.50 | 0.19 | -0.07 |
| Mood     | ←  | Nicotine            | 0.17  | 0.12 | 1.43  | .152   | -0.06 | 0.41 | 0.11  |
| Mood     | ←  | Alcohol             | 0.18  | 0.14 | 1.27  | .205   | -0.10 | 0.46 | 0.11  |
| Mood     | ←  | Stimulants          | 0.14  | 0.15 | 0.93  | .354   | -0.16 | 0.44 | 0.08  |
| Mood     | ←  | Euphorics           | -0.13 | 0.15 | -0.86 | .392   | -0.42 | 0.17 | -0.07 |
| Mood     | ←  | Cannabinoids        | 0.01  | 0.12 | 0.07  | .941   | -0.22 | 0.23 | 0.01  |
| Mood     | ←  | Benzodiazepines     | -0.64 | 0.50 | -1.29 | .198   | -1.61 | 0.33 | -0.13 |
| Mood     | ←  | Inhalants           | -0.20 | 0.25 | -0.79 | .430   | -0.69 | 0.29 | -0.06 |
| Mood     | ←  | Narcotics           | 0.98  | 0.65 | 1.50  | .133   | -0.30 | 2.26 | 0.15  |
| Mood     | ←  | Others              | -0.14 | 0.32 | -0.43 | .669   | -0.77 | 0.50 | -0.03 |
| Mood     | ←  | Gender_1            | 0.71  | 0.31 | 2.29  | .022*  | 0.10  | 1.32 | 0.50  |
| Mood     | ←  | Gender_2            | 0.96  | 0.31 | 3.11  | .002** | 0.36  | 1.56 | 0.67  |
| Mood     | ←  | Education_1         | 0.36  | 0.23 | 1.55  | .121   | -0.09 | 0.81 | 0.12  |
| Mood     | ←  | Education_2         | -0.12 | 0.18 | -0.68 | .496   | -0.46 | 0.23 | -0.05 |
| Mood     | ←  | Education_3         | 0.29  | 0.20 | 1.44  | .149   | -0.11 | 0.69 | 0.11  |
| Mood     | ←  | Education_4         | -0.03 | 0.12 | -0.29 | .774   | -0.27 | 0.20 | -0.02 |
| Mood     | ←  | Age                 | 0.01  | 0.00 | 3.05  | .002** | 0.01  | 0.02 | 0.24  |
| Mood     | ←  | Religion            | -0.04 | 0.03 | -1.14 | .256   | -0.10 | 0.03 | -0.08 |
| Mood     | ←  | Conservatism        | -0.02 | 0.05 | -0.37 | .714   | -0.12 | 0.08 | -0.03 |
| Mood     | ←  | Days                | -0.05 | 0.03 | -2.10 | .035*  | -0.10 | 0.00 | -0.16 |
| Indirect | on | Mood                | 0.04  | 0.04 | 1.06  | .291   | -0.03 | 0.11 | 0.02  |
| Direct   | on | Mood                | 0.15  | 0.19 | 0.78  | .438   | -0.22 | 0.52 | 0.06  |
| Total    | on | Mood                | 0.19  | 0.19 | 0.98  | .327   | -0.19 | 0.56 | 0.08  |

*Note.* Enter notes. \*\*\* =  $p < .001$ , \*\* =  $p < .01$ , \* =  $p < .05$ , † =  $p < .10$

Table 83

*Full structural equation model (controlling for number of days at the event)*

| Criterion | Predictor                | b     | SE   | z     | p      | $CI_{lower}^{95\%}$ | $CI_{upper}^{95\%}$ | $\beta$ |
|-----------|--------------------------|-------|------|-------|--------|---------------------|---------------------|---------|
| TE_Expect | ← Psychedelics (week)    | 0.03  | 0.23 | 0.13  | .894   | -0.42               | 0.48                | 0.00    |
| TE_Expect | ← Nicotine (week)        | 0.28  | 0.23 | 1.21  | .228   | -0.18               | 0.74                | 0.04    |
| TE_Expect | ← Alcohol (week)         | -0.35 | 0.17 | -2.06 | .039*  | -0.69               | -0.02               | -0.07   |
| TE_Expect | ← Stimulants (week)      | 0.22  | 0.24 | 0.92  | .359   | -0.25               | 0.68                | 0.03    |
| TE_Expect | ← Euphorics (week)       | 0.26  | 0.22 | 1.19  | .236   | -0.17               | 0.69                | 0.04    |
| TE_Expect | ← Cannabinoids (week)    | -0.05 | 0.18 | -0.25 | .799   | -0.40               | 0.31                | -0.01   |
| TE_Expect | ← Benzodiazepines (week) | 0.52  | 0.50 | 1.03  | .301   | -0.47               | 1.50                | 0.04    |
| TE_Expect | ← Inhalants (week)       | -0.13 | 0.33 | -0.39 | .695   | -0.79               | 0.53                | -0.01   |
| TE_Expect | ← Narcotics (week)       | -0.04 | 0.57 | -0.06 | .949   | -1.15               | 1.08                | 0.00    |
| TE_Expect | ← Others (week)          | -0.19 | 0.42 | -0.46 | .645   | -1.01               | 0.62                | -0.01   |
| TE_Expect | ← Psychedelics (24h)     | 0.35  | 0.16 | 2.20  | .027*  | 0.04                | 0.66                | 0.07    |
| TE_Expect | ← Nicotine (24h)         | -0.08 | 0.13 | -0.58 | .559   | -0.33               | 0.18                | -0.02   |
| TE_Expect | ← Alcohol (24h)          | -0.20 | 0.14 | -1.47 | .142   | -0.47               | 0.07                | -0.05   |
| TE_Expect | ← Stimulants (24h)       | 0.16  | 0.19 | 0.84  | .399   | -0.21               | 0.52                | 0.03    |
| TE_Expect | ← Euphorics (24h)        | 0.11  | 0.18 | 0.60  | .550   | -0.24               | 0.46                | 0.02    |
| TE_Expect | ← Cannabinoids (24h)     | 0.42  | 0.13 | 3.26  | .001** | 0.17                | 0.67                | 0.11    |
| TE_Expect | ← Benzodiazepines (24h)  | -0.10 | 0.41 | -0.25 | .802   | -0.91               | 0.71                | -0.01   |
| TE_Expect | ← Inhalants (24h)        | -0.05 | 0.32 | -0.15 | .879   | -0.67               | 0.58                | 0.00    |
| TE_Expect | ← Narcotics (24h)        | 0.57  | 0.56 | 1.03  | .305   | -0.52               | 1.67                | 0.04    |
| TE_Expect | ← Others (24h)           | -0.25 | 0.30 | -0.84 | .399   | -0.83               | 0.33                | -0.03   |
| TE_Expect | ← Gender_1               | -0.75 | 0.42 | -1.80 | .071†  | -1.57               | 0.06                | -0.20   |
| TE_Expect | ← Gender_2               | -0.78 | 0.42 | -1.87 | .062†  | -1.59               | 0.04                | -0.20   |
| TE_Expect | ← Education_1            | -0.28 | 0.26 | -1.09 | .275   | -0.78               | 0.22                | -0.04   |

|           |   |                        |       |      |       |                   |       |       |       |
|-----------|---|------------------------|-------|------|-------|-------------------|-------|-------|-------|
| TE_Expect | ← | Education_2            | -0.24 | 0.18 | -1.34 | .181              | -0.59 | 0.11  | -0.05 |
| TE_Expect | ← | Education_3            | -0.44 | 0.20 | -2.24 | .025*             | -0.82 | -0.06 | -0.08 |
| TE_Expect | ← | Education_4            | -0.32 | 0.16 | -2.06 | .039*             | -0.63 | -0.02 | -0.08 |
| TE_Expect | ← | Age                    | -0.02 | 0.01 | -3.18 | .001**            | -0.03 | -0.01 | -0.10 |
| TE_Expect | ← | Religion               | 0.13  | 0.03 | 3.81  | <.001***          | 0.06  | 0.20  | 0.11  |
| TE_Expect | ← | Conservatism           | -0.04 | 0.05 | -0.85 | .398              | -0.14 | 0.05  | -0.03 |
| TE_Expect | ← | Days                   | 0.02  | 0.03 | 0.51  | .608              | -0.05 | 0.08  | 0.02  |
| TE_Desire | ← | Psychedelics (week)    | 0.10  | 0.24 | 0.40  | .688              | -0.38 | 0.58  | 0.01  |
| TE_Desire | ← | Nicotine (week)        | 0.35  | 0.25 | 1.40  | .162              | -0.14 | 0.83  | 0.04  |
| TE_Desire | ← | Alcohol (week)         | -0.48 | 0.18 | -2.60 | .009**            | -0.84 | -0.12 | -0.08 |
| TE_Desire | ← | Stimulants (week)      | -0.01 | 0.25 | -0.03 | .978              | -0.50 | 0.49  | 0.00  |
| TE_Desire | ← | Euphorics (week)       | 0.45  | 0.23 | 1.91  | .056 <sup>†</sup> | -0.01 | 0.91  | 0.07  |
| TE_Desire | ← | Cannabinoids (week)    | 0.01  | 0.19 | 0.04  | .968              | -0.37 | 0.38  | 0.00  |
| TE_Desire | ← | Benzodiazepines (week) | 0.27  | 0.54 | 0.50  | .617              | -0.78 | 1.32  | 0.02  |
| TE_Desire | ← | Inhalants (week)       | 0.17  | 0.36 | 0.46  | .642              | -0.53 | 0.87  | 0.01  |
| TE_Desire | ← | Narcotics (week)       | -0.74 | 0.60 | -1.22 | .222              | -1.92 | 0.45  | -0.04 |
| TE_Desire | ← | Others (week)          | 0.33  | 0.44 | 0.74  | .459              | -0.54 | 1.20  | 0.02  |
| TE_Desire | ← | Psychedelics (24h)     | 0.32  | 0.17 | 1.89  | .059 <sup>†</sup> | -0.01 | 0.65  | 0.06  |
| TE_Desire | ← | Nicotine (24h)         | -0.13 | 0.14 | -0.97 | .332              | -0.41 | 0.14  | -0.03 |
| TE_Desire | ← | Alcohol (24h)          | -0.45 | 0.14 | -3.12 | .002**            | -0.74 | -0.17 | -0.10 |
| TE_Desire | ← | Stimulants (24h)       | 0.09  | 0.20 | 0.44  | .657              | -0.30 | 0.47  | 0.01  |
| TE_Desire | ← | Euphorics (24h)        | -0.03 | 0.19 | -0.14 | .891              | -0.40 | 0.35  | 0.00  |
| TE_Desire | ← | Cannabinoids (24h)     | 0.62  | 0.14 | 4.49  | <.001***          | 0.35  | 0.89  | 0.15  |
| TE_Desire | ← | Benzodiazepines (24h)  | 0.70  | 0.44 | 1.59  | .113              | -0.16 | 1.56  | 0.05  |
| TE_Desire | ← | Inhalants (24h)        | 0.18  | 0.34 | 0.54  | .590              | -0.48 | 0.85  | 0.02  |
| TE_Desire | ← | Narcotics (24h)        | -0.44 | 0.60 | -0.73 | .465              | -1.61 | 0.73  | -0.03 |
| TE_Desire | ← | Others (24h)           | -0.10 | 0.32 | -0.32 | .747              | -0.73 | 0.52  | -0.01 |

|           |   |                        |       |      |       |                   |       |       |       |
|-----------|---|------------------------|-------|------|-------|-------------------|-------|-------|-------|
| TE_Desire | ← | Gender_1               | -0.33 | 0.45 | -0.74 | .458              | -1.22 | 0.55  | -0.08 |
| TE_Desire | ← | Gender_2               | -0.38 | 0.45 | -0.84 | .400              | -1.26 | 0.50  | -0.09 |
| TE_Desire | ← | Education_1            | -0.30 | 0.28 | -1.09 | .275              | -0.84 | 0.24  | -0.03 |
| TE_Desire | ← | Education_2            | -0.49 | 0.19 | -2.56 | .010*             | -0.87 | -0.12 | -0.10 |
| TE_Desire | ← | Education_3            | -0.55 | 0.21 | -2.63 | .009**            | -0.96 | -0.14 | -0.09 |
| TE_Desire | ← | Education_4            | -0.44 | 0.17 | -2.59 | .009**            | -0.77 | -0.11 | -0.10 |
| TE_Desire | ← | Age                    | -0.03 | 0.01 | -4.80 | <.001***          | -0.04 | -0.02 | -0.15 |
| TE_Desire | ← | Religion               | 0.16  | 0.04 | 4.48  | <.001***          | 0.09  | 0.23  | 0.13  |
| TE_Desire | ← | Conservatism           | -0.12 | 0.05 | -2.37 | .018*             | -0.22 | -0.02 | -0.07 |
| TE_Desire | ← | Days                   | 0.05  | 0.03 | 1.42  | .155              | -0.02 | 0.12  | 0.04  |
| TE        | ← | TE_Expect              | 0.16  | 0.04 | 4.28  | <.001***          | 0.09  | 0.24  | 0.15  |
| TE        | ← | TE_Desire              | 0.22  | 0.04 | 6.31  | <.001***          | 0.15  | 0.29  | 0.23  |
| TE        | ← | Psychedelics (week)    | 0.18  | 0.22 | 0.84  | .402              | -0.25 | 0.61  | 0.02  |
| TE        | ← | Nicotine (week)        | -0.10 | 0.22 | -0.46 | .644              | -0.54 | 0.33  | -0.01 |
| TE        | ← | Alcohol (week)         | -0.21 | 0.16 | -1.26 | .207              | -0.52 | 0.11  | -0.04 |
| TE        | ← | Stimulants (week)      | 0.02  | 0.23 | 0.08  | .939              | -0.43 | 0.46  | 0.00  |
| TE        | ← | Euphorics (week)       | -0.04 | 0.21 | -0.19 | .849              | -0.45 | 0.37  | -0.01 |
| TE        | ← | Cannabinoids (week)    | -0.14 | 0.17 | -0.83 | .405              | -0.48 | 0.19  | -0.02 |
| TE        | ← | Benzodiazepines (week) | 0.05  | 0.48 | 0.10  | .924              | -0.90 | 0.99  | 0.00  |
| TE        | ← | Inhalants (week)       | 0.07  | 0.32 | 0.22  | .829              | -0.56 | 0.70  | 0.01  |
| TE        | ← | Narcotics (week)       | 0.40  | 0.55 | 0.73  | .463              | -0.67 | 1.47  | 0.02  |
| TE        | ← | Others (week)          | 0.08  | 0.40 | 0.21  | .837              | -0.70 | 0.87  | 0.01  |
| TE        | ← | Psychedelics (24h)     | 0.71  | 0.15 | 4.66  | <.001***          | 0.41  | 1.01  | 0.14  |
| TE        | ← | Nicotine (24h)         | 0.25  | 0.12 | 2.00  | .045*             | 0.01  | 0.49  | 0.06  |
| TE        | ← | Alcohol (24h)          | -0.51 | 0.13 | -3.90 | <.001***          | -0.76 | -0.25 | -0.11 |
| TE        | ← | Stimulants (24h)       | 0.34  | 0.18 | 1.94  | .052 <sup>†</sup> | 0.00  | 0.68  | 0.06  |
| TE        | ← | Euphorics (24h)        | 0.27  | 0.17 | 1.61  | .108              | -0.06 | 0.61  | 0.05  |

|             |   |                        |       |      |       |          |       |       |       |
|-------------|---|------------------------|-------|------|-------|----------|-------|-------|-------|
| TE          | ← | Cannabinoids (24h)     | 0.12  | 0.12 | 0.98  | .329     | -0.12 | 0.37  | 0.03  |
| TE          | ← | Benzodiazepines (24h)  | -0.27 | 0.40 | -0.69 | .491     | -1.06 | 0.51  | -0.02 |
| TE          | ← | Inhalants (24h)        | -0.72 | 0.30 | -2.39 | .017*    | -1.31 | -0.13 | -0.07 |
| TE          | ← | Narcotics (24h)        | -0.11 | 0.53 | -0.20 | .841     | -1.15 | 0.93  | -0.01 |
| TE          | ← | Others (24h)           | 0.44  | 0.28 | 1.55  | .120     | -0.12 | 1.00  | 0.04  |
| TE          | ← | Gender_1               | 0.27  | 0.40 | 0.69  | .488     | -0.50 | 1.05  | 0.07  |
| TE          | ← | Gender_2               | 0.35  | 0.39 | 0.89  | .373     | -0.42 | 1.13  | 0.08  |
| TE          | ← | Education_1            | 0.21  | 0.25 | 0.85  | .396     | -0.27 | 0.69  | 0.02  |
| TE          | ← | Education_2            | 0.34  | 0.17 | 1.98  | .048*    | 0.00  | 0.67  | 0.07  |
| TE          | ← | Education_3            | -0.30 | 0.18 | -1.64 | .102     | -0.66 | 0.06  | -0.05 |
| TE          | ← | Education_4            | 0.08  | 0.15 | 0.52  | .604     | -0.22 | 0.37  | 0.02  |
| TE          | ← | Age                    | 0.00  | 0.01 | 0.87  | .386     | -0.01 | 0.01  | 0.03  |
| TE          | ← | Religion               | 0.09  | 0.03 | 2.88  | .004**   | 0.03  | 0.16  | 0.07  |
| TE          | ← | Conservatism           | -0.06 | 0.05 | -1.22 | .221     | -0.15 | 0.03  | -0.03 |
| TE          | ← | Days                   | 0.20  | 0.03 | 6.50  | <.001*** | 0.14  | 0.26  | 0.17  |
| Social Con. | ← | TE                     | 0.12  | 0.02 | 5.28  | <.001*** | 0.08  | 0.17  | 0.16  |
| Social Con. | ← | Psychedelics (week)    | 0.32  | 0.19 | 1.69  | .092†    | -0.05 | 0.69  | 0.06  |
| Social Con. | ← | Nicotine (week)        | -0.05 | 0.19 | -0.24 | .808     | -0.42 | 0.33  | -0.01 |
| Social Con. | ← | Alcohol (week)         | -0.33 | 0.14 | -2.41 | .016*    | -0.60 | -0.06 | -0.08 |
| Social Con. | ← | Stimulants (week)      | -0.05 | 0.19 | -0.28 | .778     | -0.44 | 0.33  | -0.01 |
| Social Con. | ← | Euphorics (week)       | 0.18  | 0.18 | 0.97  | .333     | -0.18 | 0.53  | 0.03  |
| Social Con. | ← | Cannabinoids (week)    | 0.32  | 0.15 | 2.20  | .028*    | 0.03  | 0.61  | 0.07  |
| Social Con. | ← | Benzodiazepines (week) | -0.13 | 0.41 | -0.31 | .759     | -0.94 | 0.68  | -0.01 |
| Social Con. | ← | Inhalants (week)       | -0.51 | 0.28 | -1.83 | .068†    | -1.05 | 0.04  | -0.06 |
| Social Con. | ← | Narcotics (week)       | 0.43  | 0.47 | 0.91  | .363     | -0.49 | 1.34  | 0.03  |
| Social Con. | ← | Others (week)          | -0.21 | 0.34 | -0.61 | .542     | -0.88 | 0.46  | -0.02 |
| Social Con. | ← | Psychedelics (24h)     | 0.25  | 0.13 | 1.88  | .060†    | -0.01 | 0.51  | 0.06  |

|             |   |                       |       |      |       |                   |       |       |       |
|-------------|---|-----------------------|-------|------|-------|-------------------|-------|-------|-------|
| Social Con. | ← | Nicotine (24h)        | 0.14  | 0.11 | 1.30  | .192              | -0.07 | 0.35  | 0.04  |
| Social Con. | ← | Alcohol (24h)         | -0.08 | 0.11 | -0.73 | .463              | -0.30 | 0.14  | -0.02 |
| Social Con. | ← | Stimulants (24h)      | -0.04 | 0.15 | -0.27 | .788              | -0.34 | 0.25  | -0.01 |
| Social Con. | ← | Euphorics (24h)       | 0.05  | 0.15 | 0.36  | .718              | -0.23 | 0.34  | 0.01  |
| Social Con. | ← | Cannabinoids (24h)    | 0.05  | 0.11 | 0.50  | .615              | -0.15 | 0.26  | 0.02  |
| Social Con. | ← | Benzodiazepines (24h) | -0.14 | 0.34 | -0.42 | .674              | -0.81 | 0.52  | -0.01 |
| Social Con. | ← | Inhalants (24h)       | 0.45  | 0.26 | 1.75  | .080 <sup>†</sup> | -0.05 | 0.95  | 0.06  |
| Social Con. | ← | Narcotics (24h)       | 0.04  | 0.45 | 0.10  | .921              | -0.84 | 0.93  | 0.00  |
| Social Con. | ← | Others (24h)          | -0.07 | 0.24 | -0.27 | .788              | -0.54 | 0.41  | -0.01 |
| Social Con. | ← | Gender_1              | -0.33 | 0.35 | -0.94 | .349              | -1.02 | 0.36  | -0.10 |
| Social Con. | ← | Gender_2              | -0.05 | 0.35 | -0.14 | .891              | -0.74 | 0.64  | -0.02 |
| Social Con. | ← | Education_1           | -0.09 | 0.21 | -0.45 | .652              | -0.51 | 0.32  | -0.01 |
| Social Con. | ← | Education_2           | -0.07 | 0.14 | -0.48 | .633              | -0.35 | 0.21  | -0.02 |
| Social Con. | ← | Education_3           | 0.10  | 0.16 | 0.67  | .505              | -0.20 | 0.41  | 0.02  |
| Social Con. | ← | Education_4           | -0.11 | 0.13 | -0.86 | .388              | -0.36 | 0.14  | -0.03 |
| Social Con. | ← | Age                   | 0.01  | 0.00 | 2.51  | .012*             | 0.00  | 0.02  | 0.08  |
| Social Con. | ← | Religion              | 0.06  | 0.03 | 2.29  | .022*             | 0.01  | 0.12  | 0.07  |
| Social Con. | ← | Conservatism          | 0.03  | 0.04 | 0.80  | .423              | -0.05 | 0.11  | 0.02  |
| Social Con. | ← | Days                  | -0.07 | 0.03 | -2.64 | .008**            | -0.12 | -0.02 | -0.08 |
| Mood        | ← | TE                    | 0.07  | 0.01 | 6.56  | <.001***          | 0.05  | 0.10  | 0.19  |
| Mood        | ← | Social Con.           | 0.10  | 0.01 | 7.15  | <.001***          | 0.07  | 0.13  | 0.20  |
| Mood        | ← | Psychedelics (week)   | -0.07 | 0.09 | -0.83 | .409              | -0.25 | 0.10  | -0.03 |
| Mood        | ← | Nicotine (week)       | 0.09  | 0.09 | 1.00  | .317              | -0.09 | 0.27  | 0.03  |
| Mood        | ← | Alcohol (week)        | -0.03 | 0.07 | -0.41 | .684              | -0.16 | 0.10  | -0.01 |
| Mood        | ← | Stimulants (week)     | 0.06  | 0.09 | 0.66  | .511              | -0.12 | 0.24  | 0.02  |
| Mood        | ← | Euphorics (week)      | -0.07 | 0.09 | -0.83 | .407              | -0.24 | 0.10  | -0.03 |
| Mood        | ← | Cannabinoids (week)   | 0.03  | 0.07 | 0.38  | .705              | -0.11 | 0.17  | 0.01  |

|          |    |                        |       |      |       |                   |       |       |       |
|----------|----|------------------------|-------|------|-------|-------------------|-------|-------|-------|
| Mood     | ←  | Benzodiazepines (week) | -0.18 | 0.20 | -0.91 | .363              | -0.57 | 0.21  | -0.03 |
| Mood     | ←  | Inhalants (week)       | 0.20  | 0.13 | 1.51  | .130              | -0.06 | 0.46  | 0.05  |
| Mood     | ←  | Narcotics (week)       | -0.20 | 0.22 | -0.87 | .385              | -0.64 | 0.25  | -0.03 |
| Mood     | ←  | Others (week)          | 0.01  | 0.17 | 0.09  | .932              | -0.31 | 0.34  | 0.00  |
| Mood     | ←  | Psychedelics (24h)     | 0.13  | 0.06 | 2.01  | .045*             | 0.00  | 0.25  | 0.06  |
| Mood     | ←  | Nicotine (24h)         | 0.03  | 0.05 | 0.51  | .610              | -0.07 | 0.13  | 0.02  |
| Mood     | ←  | Alcohol (24h)          | -0.05 | 0.05 | -0.85 | .396              | -0.15 | 0.06  | -0.03 |
| Mood     | ←  | Stimulants (24h)       | 0.07  | 0.07 | 0.96  | .337              | -0.07 | 0.21  | 0.03  |
| Mood     | ←  | Euphorics (24h)        | 0.00  | 0.07 | -0.06 | .955              | -0.14 | 0.13  | 0.00  |
| Mood     | ←  | Cannabinoids (24h)     | 0.06  | 0.05 | 1.20  | .231              | -0.04 | 0.16  | 0.04  |
| Mood     | ←  | Benzodiazepines (24h)  | -0.15 | 0.17 | -0.91 | .365              | -0.48 | 0.17  | -0.03 |
| Mood     | ←  | Inhalants (24h)        | -0.09 | 0.13 | -0.75 | .453              | -0.34 | 0.15  | -0.02 |
| Mood     | ←  | Narcotics (24h)        | -0.03 | 0.22 | -0.14 | .892              | -0.47 | 0.40  | 0.00  |
| Mood     | ←  | Others (24h)           | -0.19 | 0.12 | -1.64 | .102              | -0.43 | 0.04  | -0.05 |
| Mood     | ←  | Gender_1               | 0.14  | 0.17 | 0.79  | .427              | -0.20 | 0.47  | 0.09  |
| Mood     | ←  | Gender_2               | 0.16  | 0.17 | 0.96  | .337              | -0.17 | 0.50  | 0.10  |
| Mood     | ←  | Education_1            | 0.00  | 0.10 | -0.01 | .989              | -0.20 | 0.20  | 0.00  |
| Mood     | ←  | Education_2            | -0.14 | 0.07 | -1.97 | .049*             | -0.28 | 0.00  | -0.07 |
| Mood     | ←  | Education_3            | -0.12 | 0.08 | -1.51 | .130              | -0.26 | 0.03  | -0.05 |
| Mood     | ←  | Education_4            | -0.11 | 0.06 | -1.77 | .076 <sup>†</sup> | -0.23 | 0.01  | -0.07 |
| Mood     | ←  | Age                    | 0.01  | 0.00 | 2.88  | .004**            | 0.00  | 0.01  | 0.09  |
| Mood     | ←  | Religion               | -0.01 | 0.01 | -0.90 | .367              | -0.04 | 0.01  | -0.03 |
| Mood     | ←  | Conservatism           | -0.01 | 0.02 | -0.49 | .626              | -0.05 | 0.03  | -0.01 |
| Mood     | ←  | Days                   | -0.05 | 0.01 | -3.52 | <.001***          | -0.07 | -0.02 | -0.10 |
| Indirect | on | Mood via TE            | 0.05  | 0.01 | 3.80  | <.001***          | 0.03  | 0.08  | 0.03  |
| Indirect | on | Mood via Soc.Con.      | 0.02  | 0.01 | 1.82  | .069 <sup>†</sup> | 0.00  | 0.05  | 0.01  |
| Indirect | on | Mood via both          | 0.01  | 0.00 | 3.15  | .002**            | 0.00  | 0.01  | 0.00  |

|          |    |            |      |      |      |          |      |      |      |
|----------|----|------------|------|------|------|----------|------|------|------|
| Indirect | on | Mood (all) | 0.09 | 0.02 | 4.22 | <.001*** | 0.05 | 0.13 | 0.04 |
| Direct   | on | Mood       | 0.13 | 0.06 | 2.01 | .045*    | 0.00 | 0.25 | 0.06 |
| Total    | on | Mood       | 0.21 | 0.07 | 3.26 | .001**   | 0.09 | 0.34 | 0.11 |

---

*Note.* Enter notes. \*\*\* =  $p < .001$ , \*\* =  $p < .01$ , \* =  $p < .05$ , † =  $p < .10$

**Table captions**

- Table 1.* Prediction of transformative experiences
- Table 2.* Prediction of expectations of transformative experiences
- Table 3.* Prediction of desire for transformative experiences
- Table 4.* Prediction of transformative experiences, controlling for expectations and desires
- Table 5.* Prediction of epistemically transformative experiences
- Table 6.* Prediction of epistemically transformative experiences, controlling for expectations and desires
- Table 7.* Prediction of social connectedness
- Table 8.* Prediction of mood
- Table 9.* Prediction of mood via self-reported transformative experiences
- Table 10.* Prediction of mood via social connectedness
- Table 11.* Prediction of transformative experiences (24h vs. last week)
- Table 12.* Prediction of expectations of transformative experiences (24h vs. last week)
- Table 13.* Prediction of desire for transformative experiences (24h vs. last week)
- Table 14.* Prediction of transformative experiences, controlling for expectations and desires (24h vs. last week)
- Table 15.* Prediction of epistemically transformative experiences (24h vs. last week)
- Table 16.* Prediction of epistemically transformative experiences, controlling for expectations and desires (24h vs. last week)
- Table 17.* Prediction of social connectedness (24h vs. last week)
- Table 18.* Prediction of mood (24h vs. last week)
- Table 19.* Prediction of mood via social connectedness (24h vs. last week)
- Table 20.* Prediction of mood via self-reported transformative experiences (24h vs. last week)

- Table 21.* Prediction of transformative experiences (24h only)
- Table 22.* Prediction of expectations of transformative experiences (24h only)
- Table 23.* Prediction of desire for transformative experiences (24h only)
- Table 24.* Prediction of transformative experiences, controlling for expectations and desires (24h only)
- Table 25.* Prediction of epistemically transformative experiences (24h only)
- Table 26.* Prediction of epistemically transformative experiences, controlling for expectations and desires (24h only)
- Table 27.* Prediction of social connectedness (24h only)
- Table 28.* Prediction of mood (24h only)
- Table 29.* Prediction of mood via self-reported transformative experiences (24h only)
- Table 30.* Prediction of mood via social connectedness (24h only)
- Table 31.* Full structural equation model
- Table 32.* Full structural equation model (sum scores)
- Table 33.* Prediction of transformative experiences (excluding participants currently under influence of psychedelics)
- Table 34.* Prediction of epistemically transformative experiences (excluding participants currently under influence of psychedelics)
- Table 35.* Prediction of transformative experiences, controlling for expectations and desires (excluding participants currently under influence of psychedelics)
- Table 36.* Prediction of epistemically transformative experiences, controlling for expectations and desires (excluding participants currently under influence of psychedelics)
- Table 37.* Prediction of social connectedness (excluding participants currently under influence of psychedelics)

- Table 38.* Prediction of mood (excluding participants currently under influence of psychedelics)
- Table 39.* Prediction of mood via self-reported transformative experiences (excluding participants currently under influence of psychedelics)
- Table 40.* Prediction of mood via social connectedness (excluding participants currently under influence of psychedelics)
- Table 41.* Prediction of transformative experiences (24h vs. last week; excluding participants currently under influence of psychedelics)
- Table 42.* Prediction of epistemically transformative experiences (24h vs. last week; excluding participants currently under influence of psychedelics)
- Table 43.* Prediction of transformative experiences, controlling for expectations and desires (24h vs. last week; excluding participants currently under influence of psychedelics)
- Table 44.* Prediction of epistemically transformative experiences, controlling for expectations and desires (24h vs. last week; excluding participants currently under influence of psychedelics)
- Table 45.* Prediction of social connectedness (24h vs. last week; excluding participants currently under influence of psychedelics)
- Table 46.* Prediction of mood (24h vs. last week; excluding participants currently under influence of psychedelics)
- Table 47.* Prediction of mood via self-reported transformative experiences (24h vs. last week; excluding participants currently under influence of psychedelics)
- Table 48.* Prediction of mood via social connectedness (24h vs. last week; excluding participants currently under influence of psychedelics)
- Table 49.* Full structural equation model (excluding participants currently under influence of psychedelics)
- Table 50.* Prediction of transformative experiences (fully sober participants only)

- Table 51.* Prediction of epistemically transformative experiences (fully sober participants only)
- Table 52.* Prediction of transformative experiences, controlling for expectations and desires (fully sober participants only)
- Table 53.* Prediction of epistemically transformative experiences, controlling for expectations and desires (fully sober participants only)
- Table 54.* Prediction of social connectedness (fully sober participants only)
- Table 55.* Prediction of mood (fully sober participants only)
- Table 56.* Prediction of mood via self-reported transformative experiences (fully sober participants only)
- Table 57.* Prediction of mood via social connectedness (fully sober participants only)
- Table 58.* Prediction of transformative experiences (24h vs. last week; fully sober participants only)
- Table 59.* Prediction of epistemically transformative experiences (24h vs. last week; fully sober participants only)
- Table 60.* Prediction of transformative experiences, controlling for expectations and desires (24h vs. last week; fully sober participants only)
- Table 61.* Prediction of epistemically transformative experiences, controlling for expectations and desires (24h vs. last week; fully sober participants only)
- Table 62.* Prediction of social connectedness (24h vs. last week; fully sober participants only)
- Table 63.* Prediction of mood (24h vs. last week; fully sober participants only)
- Table 64.* Prediction of mood via self-reported transformative experiences (24h vs. last week; fully sober participants only)
- Table 65.* Prediction of mood via social connectedness (24h vs. last week; fully sober participants only)

- Table 66.* Full structural equation model (fully sober participants only)
- Table 67.* Prediction of transformative experiences (controlling for number of days at the event)
- Table 68.* Prediction of epistemically transformative experiences (controlling for number of days at the event)
- Table 69.* Prediction of transformative experiences, controlling for expectations and desires (controlling for number of days at the event)
- Table 70.* Prediction of epistemically transformative experiences, controlling for expectations and desires (controlling for number of days at the event)
- Table 71.* Prediction of social connectedness (controlling for number of days at the event)
- Table 72.* Prediction of mood (controlling for number of days at the event)
- Table 73.* Prediction of mood via self-reported transformative experiences (controlling for number of days at the event)
- Table 74.* Prediction of mood via social connectedness (controlling for number of days at the event)
- Table 75.* Prediction of transformative experiences (24h vs. last week; controlling for number of days at the event)
- Table 76.* Prediction of epistemically transformative experiences (24h vs. last week; controlling for number of days at the event)
- Table 77.* Prediction of transformative experiences, controlling for expectations and desires (24h vs. last week; controlling for number of days at the event)
- Table 78.* Prediction of epistemically transformative experiences, controlling for expectations and desires (24h vs. last week; sober participants only)
- Table 79.* Prediction of social connectedness (24h vs. last week; controlling for number of days at the event)

- Table 80.* Prediction of mood (24h vs. last week; controlling for number of days at the event)
- Table 81.* Prediction of mood via self-reported transformative experiences (24h vs. last week; controlling for number of days at the event)
- Table 82.* Prediction of mood via social connectedness (24h vs. last week; controlling for number of days at the event)
- Table 83.* Full structural equation model (controlling for number of days at the event)

Supplementary Materials III: Psychedelics and transformative experiences (Tables for the  
SOM I)

Matthias Forstmann<sup>1,2</sup>, Daniel A. Yudkin<sup>1</sup>, Annayah M. B. Prosser<sup>3</sup>, S. Megan Heller<sup>4</sup>, &  
Molly J. Crockett<sup>1</sup>

<sup>1</sup> Yale University, Department of Psychology

<sup>2</sup> University of Cologne, Department of Psychology

<sup>3</sup> University of Bath, Department of Psychology

<sup>4</sup> University of California, Los Angeles, Department of Anthropology

Supplementary Materials III: Psychedelics and transformative experiences (Tables for the  
SOM I)

**SOM II: Tables for Analyses Reported in the SOM I.**

In the following, we will provide tables for the additional analyses reported in the SOM I. First, we will report results for the analyses using substance use sum scores (not differentiating between very recent and moderately recent use of each substance). Then, we will show the result for the analyses differentiating between very recent (in the last 24 hours) and moderately recent use (in the week prior) of psychedelic substances. Lastly, the same analyses will be reported including *only* variables representing use of the substances within the last 24 hours (24h only).

**Simple regressions**

The following tables represent results for the simple regression analyses reported in the SOM I. Tables include all predictors assessed, including use of substances from the various substance classes over the entire past week (i.e., a single indicator not differentiating between moderately and very recent use) as well the control variables specified in the pre-registration (some of which were dummy-coded).

Table 1

*Prediction of social fusion*

| Criterion     | Predictor         | b     | SE   | z     | p                 | $CI_{lower}^{95\%}$ | $CI_{upper}^{95\%}$ | $\beta$ |
|---------------|-------------------|-------|------|-------|-------------------|---------------------|---------------------|---------|
| Social Fusion | ← Psychedelics    | 0.19  | 0.09 | 2.10  | .035*             | 0.01                | 0.37                | 0.08    |
| Social Fusion | ← Nicotine        | 0.11  | 0.08 | 1.26  | .207              | -0.06               | 0.27                | 0.05    |
| Social Fusion | ← Alcohol         | -0.07 | 0.09 | -0.71 | .477              | -0.25               | 0.12                | -0.03   |
| Social Fusion | ← Stimulants      | 0.22  | 0.10 | 2.22  | .026*             | 0.03                | 0.41                | 0.09    |
| Social Fusion | ← Euphorics       | 0.01  | 0.10 | 0.09  | .927              | -0.18               | 0.20                | 0.00    |
| Social Fusion | ← Cannabinoids    | 0.02  | 0.08 | 0.27  | .788              | -0.14               | 0.19                | 0.01    |
| Social Fusion | ← Benzodiazepines | 0.00  | 0.21 | 0.01  | .994              | -0.41               | 0.41                | 0.00    |
| Social Fusion | ← Inhalants       | 0.06  | 0.15 | 0.40  | .688              | -0.24               | 0.36                | 0.01    |
| Social Fusion | ← Narcotics       | -0.31 | 0.27 | -1.16 | .245              | -0.83               | 0.21                | -0.05   |
| Social Fusion | ← Others          | -0.26 | 0.15 | -1.70 | .089 <sup>†</sup> | -0.56               | 0.04                | -0.06   |
| Social Fusion | ← Gender_1        | -0.11 | 0.25 | -0.46 | .647              | -0.60               | 0.37                | -0.05   |
| Social Fusion | ← Gender_2        | -0.20 | 0.25 | -0.82 | .415              | -0.69               | 0.28                | -0.09   |
| Social Fusion | ← Education_1     | 0.23  | 0.16 | 1.45  | .146              | -0.08               | 0.55                | 0.05    |
| Social Fusion | ← Education_2     | 0.34  | 0.12 | 2.94  | .003**            | 0.11                | 0.57                | 0.13    |
| Social Fusion | ← Education_3     | 0.24  | 0.14 | 1.72  | .085 <sup>†</sup> | -0.03               | 0.51                | 0.07    |
| Social Fusion | ← Education_4     | 0.20  | 0.10 | 1.97  | .048*             | 0.00                | 0.40                | 0.09    |
| Social Fusion | ← Age             | 0.00  | 0.00 | -0.92 | .355              | -0.01               | 0.00                | -0.03   |
| Social Fusion | ← Religion        | 0.05  | 0.02 | 2.35  | .019*             | 0.01                | 0.10                | 0.08    |
| Social Fusion | ← Conservatism    | -0.03 | 0.03 | -0.86 | .393              | -0.09               | 0.03                | -0.03   |

*Note.* Enter notes. \*\*\* =  $p < .001$ , \*\* =  $p < .01$ , \* =  $p < .05$ , <sup>†</sup> =  $p < .10$

Table 2

*Prediction of prosocial behavior in dictator game*

| Criterion | Predictor         | b     | SE   | z     | p                 | $CI_{lower}^{95\%}$ | $CI_{upper}^{95\%}$ | $\beta$ |
|-----------|-------------------|-------|------|-------|-------------------|---------------------|---------------------|---------|
| Dictator  | ← Psychedelics    | 0.20  | 0.25 | 0.81  | .419              | -0.29               | 0.69                | 0.03    |
| Dictator  | ← Nicotine        | -0.08 | 0.21 | -0.37 | .715              | -0.50               | 0.34                | -0.01   |
| Dictator  | ← Alcohol         | -0.07 | 0.25 | -0.30 | .767              | -0.56               | 0.42                | -0.01   |
| Dictator  | ← Stimulants      | -0.26 | 0.28 | -0.93 | .353              | -0.79               | 0.28                | -0.04   |
| Dictator  | ← Euphorics       | 0.08  | 0.26 | 0.31  | .757              | -0.43               | 0.59                | 0.01    |
| Dictator  | ← Cannabinoids    | -0.27 | 0.22 | -1.27 | .203              | -0.70               | 0.15                | -0.05   |
| Dictator  | ← Benzodiazepines | -0.01 | 0.54 | -0.01 | .991              | -1.07               | 1.06                | 0.00    |
| Dictator  | ← Inhalants       | -0.07 | 0.41 | -0.17 | .869              | -0.87               | 0.73                | -0.01   |
| Dictator  | ← Narcotics       | -0.83 | 0.65 | -1.26 | .206              | -2.11               | 0.46                | -0.05   |
| Dictator  | ← Others          | 0.51  | 0.41 | 1.23  | .220              | -0.30               | 1.31                | 0.04    |
| Dictator  | ← Gender_1        | -1.14 | 0.76 | -1.50 | .135              | -2.64               | 0.36                | -0.19   |
| Dictator  | ← Gender_2        | -1.58 | 0.76 | -2.07 | .039*             | -3.08               | -0.08               | -0.26   |
| Dictator  | ← Education_1     | -0.24 | 0.45 | -0.54 | .592              | -1.12               | 0.64                | -0.02   |
| Dictator  | ← Education_2     | 0.06  | 0.31 | 0.18  | .858              | -0.55               | 0.66                | 0.01    |
| Dictator  | ← Education_3     | -0.14 | 0.33 | -0.42 | .674              | -0.79               | 0.51                | -0.02   |
| Dictator  | ← Education_4     | 0.19  | 0.28 | 0.69  | .489              | -0.35               | 0.73                | 0.03    |
| Dictator  | ← Age             | 0.02  | 0.01 | 2.18  | .029*             | 0.00                | 0.04                | 0.08    |
| Dictator  | ← Religion        | -0.02 | 0.06 | -0.41 | .682              | -0.14               | 0.09                | -0.01   |
| Dictator  | ← Conservatism    | -0.15 | 0.08 | -1.88 | .059 <sup>†</sup> | -0.31               | 0.01                | -0.06   |

*Note.* Enter notes. \*\*\* =  $p < .001$ , \*\* =  $p < .01$ , \* =  $p < .05$ , <sup>†</sup> =  $p < .10$

Table 3

*Prediction of prosocial behavior in trust game*

| Criterion |   | Predictor       | b     | SE   | z     | p                 | $CI_{lower}^{95\%}$ | $CI_{upper}^{95\%}$ | $\beta$ |
|-----------|---|-----------------|-------|------|-------|-------------------|---------------------|---------------------|---------|
| Trust     | ← | Psychedelics    | 0.29  | 0.23 | 1.25  | .210              | -0.16               | 0.74                | 0.11    |
| Trust     | ← | Nicotine        | 0.14  | 0.19 | 0.71  | .476              | -0.24               | 0.51                | 0.06    |
| Trust     | ← | Alcohol         | -0.16 | 0.22 | -0.75 | .453              | -0.59               | 0.26                | -0.06   |
| Trust     | ← | Stimulants      | -0.16 | 0.24 | -0.67 | .502              | -0.63               | 0.31                | -0.06   |
| Trust     | ← | Euphorics       | -0.19 | 0.24 | -0.81 | .416              | -0.66               | 0.27                | -0.07   |
| Trust     | ← | Cannabinoids    | -0.04 | 0.18 | -0.24 | .812              | -0.40               | 0.31                | -0.02   |
| Trust     | ← | Benzodiazepines | 0.41  | 0.78 | 0.52  | .603              | -1.13               | 1.94                | 0.06    |
| Trust     | ← | Inhalants       | 0.79  | 0.39 | 2.04  | .042*             | 0.03                | 1.54                | 0.16    |
| Trust     | ← | Narcotics       | -2.14 | 1.03 | -2.09 | .037*             | -4.15               | -0.13               | -0.22   |
| Trust     | ← | Others          | 0.65  | 0.51 | 1.28  | .202              | -0.35               | 1.64                | 0.10    |
| Trust     | ← | Gender_1        | -0.43 | 0.48 | -0.90 | .366              | -1.38               | 0.51                | -0.20   |
| Trust     | ← | Gender_2        | -0.77 | 0.48 | -1.61 | .108              | -1.71               | 0.17                | -0.36   |
| Trust     | ← | Education_1     | 0.03  | 0.34 | 0.10  | .919              | -0.64               | 0.70                | 0.01    |
| Trust     | ← | Education_2     | -0.06 | 0.27 | -0.21 | .837              | -0.58               | 0.47                | -0.02   |
| Trust     | ← | Education_3     | -0.61 | 0.32 | -1.90 | .057 <sup>†</sup> | -1.23               | 0.02                | -0.15   |
| Trust     | ← | Education_4     | 0.31  | 0.19 | 1.64  | .100              | -0.06               | 0.67                | 0.14    |
| Trust     | ← | Age             | 0.01  | 0.01 | 0.70  | .481              | -0.01               | 0.02                | 0.06    |
| Trust     | ← | Religion        | 0.07  | 0.05 | 1.41  | .157              | -0.03               | 0.18                | 0.10    |
| Trust     | ← | Conservatism    | -0.04 | 0.07 | -0.55 | .579              | -0.18               | 0.10                | -0.04   |

*Note.* Enter notes. \*\*\* =  $p < .001$ , \*\* =  $p < .01$ , \* =  $p < .05$ , <sup>†</sup> =  $p < .10$

Table 4

*Prediction of prosocial behavior on give-to-a-stranger item*

| Criterion       | Predictor         | b     | SE   | z     | p                 | $CI_{lower}^{95\%}$ | $CI_{upper}^{95\%}$ | $\beta$ |
|-----------------|-------------------|-------|------|-------|-------------------|---------------------|---------------------|---------|
| Give-A-Stranger | ← Psychedelics    | 0.07  | 0.08 | 0.88  | .380              | -0.09               | 0.23                | 0.03    |
| Give-A-Stranger | ← Nicotine        | 0.07  | 0.07 | 0.98  | .327              | -0.07               | 0.21                | 0.03    |
| Give-A-Stranger | ← Alcohol         | -0.08 | 0.08 | -0.99 | .322              | -0.24               | 0.08                | -0.03   |
| Give-A-Stranger | ← Stimulants      | -0.11 | 0.09 | -1.19 | .232              | -0.28               | 0.07                | -0.04   |
| Give-A-Stranger | ← Euphorics       | 0.09  | 0.09 | 1.00  | .318              | -0.08               | 0.26                | 0.04    |
| Give-A-Stranger | ← Cannabinoids    | 0.08  | 0.07 | 1.11  | .266              | -0.06               | 0.22                | 0.04    |
| Give-A-Stranger | ← Benzodiazepines | -0.21 | 0.19 | -1.12 | .262              | -0.58               | 0.16                | -0.04   |
| Give-A-Stranger | ← Inhalants       | -0.10 | 0.14 | -0.73 | .466              | -0.38               | 0.17                | -0.03   |
| Give-A-Stranger | ← Narcotics       | 0.26  | 0.23 | 1.12  | .262              | -0.20               | 0.72                | 0.04    |
| Give-A-Stranger | ← Others          | 0.02  | 0.14 | 0.16  | .876              | -0.25               | 0.29                | 0.01    |
| Give-A-Stranger | ← Gender_1        | 0.01  | 0.23 | 0.03  | .979              | -0.44               | 0.45                | 0.00    |
| Give-A-Stranger | ← Gender_2        | -0.02 | 0.23 | -0.10 | .921              | -0.47               | 0.42                | -0.01   |
| Give-A-Stranger | ← Education_1     | 0.01  | 0.14 | 0.09  | .930              | -0.27               | 0.30                | 0.00    |
| Give-A-Stranger | ← Education_2     | 0.06  | 0.10 | 0.62  | .538              | -0.14               | 0.26                | 0.03    |
| Give-A-Stranger | ← Education_3     | -0.14 | 0.11 | -1.30 | .192              | -0.35               | 0.07                | -0.05   |
| Give-A-Stranger | ← Education_4     | 0.06  | 0.09 | 0.71  | .475              | -0.11               | 0.24                | 0.03    |
| Give-A-Stranger | ← Age             | 0.01  | 0.00 | 4.54  | <.001***          | 0.01                | 0.02                | 0.16    |
| Give-A-Stranger | ← Religion        | 0.02  | 0.02 | 0.90  | .368              | -0.02               | 0.06                | 0.03    |
| Give-A-Stranger | ← Conservatism    | -0.04 | 0.03 | -1.65 | .098 <sup>†</sup> | -0.10               | 0.01                | -0.05   |

*Note.* Enter notes. \*\*\* =  $p < .001$ , \*\* =  $p < .01$ , \* =  $p < .05$ , <sup>†</sup> =  $p < .10$

Table 5

*Prediction of sociocentric perspective in E-Task*

| Criterion | Predictor         | b     | SE   | z     | p                 | $CI_{lower}^{95\%}$ | $CI_{upper}^{95\%}$ | $\beta$ |
|-----------|-------------------|-------|------|-------|-------------------|---------------------|---------------------|---------|
| PT        | ← Psychedelics    | 0.06  | 0.03 | 2.02  | .043*             | 0.00                | 0.12                | 0.07    |
| PT        | ← Nicotine        | -0.04 | 0.03 | -1.48 | .138              | -0.09               | 0.01                | -0.05   |
| PT        | ← Alcohol         | -0.01 | 0.03 | -0.19 | .852              | -0.06               | 0.05                | -0.01   |
| PT        | ← Stimulants      | -0.01 | 0.03 | -0.38 | .704              | -0.08               | 0.05                | -0.01   |
| PT        | ← Euphorics       | 0.04  | 0.03 | 1.18  | .237              | -0.02               | 0.10                | 0.04    |
| PT        | ← Cannabinoids    | 0.00  | 0.03 | 0.16  | .871              | -0.05               | 0.05                | 0.01    |
| PT        | ← Benzodiazepines | 0.11  | 0.07 | 1.72  | .085 <sup>†</sup> | -0.02               | 0.24                | 0.06    |
| PT        | ← Inhalants       | -0.14 | 0.05 | -2.93 | .003**            | -0.24               | -0.05               | -0.10   |
| PT        | ← Narcotics       | -0.06 | 0.08 | -0.73 | .468              | -0.22               | 0.10                | -0.03   |
| PT        | ← Others          | -0.01 | 0.05 | -0.28 | .781              | -0.11               | 0.08                | -0.01   |
| PT        | ← Gender_1        | -0.05 | 0.08 | -0.66 | .509              | -0.21               | 0.11                | -0.07   |
| PT        | ← Gender_2        | -0.07 | 0.08 | -0.87 | .383              | -0.23               | 0.09                | -0.09   |
| PT        | ← Education_1     | 0.00  | 0.05 | 0.02  | .987              | -0.10               | 0.10                | 0.00    |
| PT        | ← Education_2     | 0.00  | 0.04 | 0.04  | .970              | -0.07               | 0.07                | 0.00    |
| PT        | ← Education_3     | 0.02  | 0.04 | 0.62  | .533              | -0.05               | 0.10                | 0.02    |
| PT        | ← Education_4     | 0.06  | 0.03 | 1.94  | .053 <sup>†</sup> | 0.00                | 0.12                | 0.08    |
| PT        | ← Age             | 0.00  | 0.00 | -0.11 | .910              | 0.00                | 0.00                | 0.00    |
| PT        | ← Religion        | 0.00  | 0.01 | 0.04  | .968              | -0.01               | 0.01                | 0.00    |
| PT        | ← Conservatism    | -0.01 | 0.01 | -0.66 | .509              | -0.03               | 0.01                | -0.02   |

*Note.* Enter notes. \*\*\* =  $p < .001$ , \*\* =  $p < .01$ , \* =  $p < .05$ , <sup>†</sup> =  $p < .10$

Table 6

*Prediction of both action and outcome valuation in judgments of moral praiseworthiness*

| Criterion    |   | Predictor       | b     | SE   | z     | p                 | $CI_{lower}^{95\%}$ | $CI_{upper}^{95\%}$ | $\beta$ |
|--------------|---|-----------------|-------|------|-------|-------------------|---------------------|---------------------|---------|
| Outcome Val. | ← | Psychedelics    | -0.05 | 0.05 | -0.96 | .337              | -0.14               | 0.05                | -0.03   |
| Outcome Val. | ← | Nicotine        | 0.05  | 0.04 | 1.15  | .249              | -0.03               | 0.13                | 0.04    |
| Outcome Val. | ← | Alcohol         | 0.09  | 0.05 | 1.85  | .065 <sup>†</sup> | -0.01               | 0.18                | 0.06    |
| Outcome Val. | ← | Stimulants      | -0.10 | 0.05 | -2.05 | .041*             | -0.21               | 0.00                | -0.07   |
| Outcome Val. | ← | Euphorics       | 0.02  | 0.05 | 0.40  | .688              | -0.08               | 0.12                | 0.01    |
| Outcome Val. | ← | Cannabinoids    | -0.10 | 0.04 | -2.50 | .012*             | -0.18               | -0.02               | -0.09   |
| Outcome Val. | ← | Benzodiazepines | -0.04 | 0.11 | -0.38 | .705              | -0.25               | 0.17                | -0.01   |
| Outcome Val. | ← | Inhalants       | 0.15  | 0.08 | 1.83  | .067 <sup>†</sup> | -0.01               | 0.30                | 0.06    |
| Outcome Val. | ← | Narcotics       | -0.13 | 0.13 | -0.98 | .327              | -0.39               | 0.13                | -0.04   |
| Outcome Val. | ← | Others          | 0.11  | 0.08 | 1.42  | .155              | -0.04               | 0.27                | 0.04    |
| Outcome Val. | ← | Gender_1        | 0.11  | 0.13 | 0.83  | .409              | -0.14               | 0.36                | 0.09    |
| Outcome Val. | ← | Gender_2        | 0.00  | 0.13 | 0.02  | .982              | -0.25               | 0.25                | 0.00    |
| Outcome Val. | ← | Education_1     | -0.09 | 0.08 | -1.14 | .256              | -0.25               | 0.07                | -0.04   |
| Outcome Val. | ← | Education_2     | -0.12 | 0.06 | -2.14 | .032*             | -0.24               | -0.01               | -0.09   |
| Outcome Val. | ← | Education_3     | 0.06  | 0.06 | 1.05  | .293              | -0.06               | 0.19                | 0.04    |
| Outcome Val. | ← | Education_4     | 0.00  | 0.05 | 0.03  | .977              | -0.10               | 0.10                | 0.00    |
| Outcome Val. | ← | Age             | 0.00  | 0.00 | 2.57  | .010*             | 0.00                | 0.01                | 0.09    |
| Outcome Val. | ← | Religion        | -0.03 | 0.01 | -2.52 | .012*             | -0.05               | -0.01               | -0.08   |
| Outcome Val. | ← | Conservatism    | 0.02  | 0.02 | 1.49  | .137              | -0.01               | 0.05                | 0.05    |
| Action Val.  | ← | Psychedelics    | 0.00  | 0.04 | -0.05 | .959              | -0.09               | 0.08                | 0.00    |
| Action Val.  | ← | Nicotine        | -0.05 | 0.04 | -1.23 | .217              | -0.12               | 0.03                | -0.04   |
| Action Val.  | ← | Alcohol         | -0.02 | 0.04 | -0.48 | .629              | -0.11               | 0.06                | -0.02   |
| Action Val.  | ← | Stimulants      | 0.07  | 0.05 | 1.53  | .125              | -0.02               | 0.16                | 0.06    |

|             |   |                 |       |      |       |                   |       |      |       |
|-------------|---|-----------------|-------|------|-------|-------------------|-------|------|-------|
| Action Val. | ← | Euphorics       | 0.03  | 0.05 | 0.72  | .473              | -0.06 | 0.12 | 0.03  |
| Action Val. | ← | Cannabinoids    | 0.10  | 0.04 | 2.56  | .010*             | 0.02  | 0.17 | 0.09  |
| Action Val. | ← | Benzodiazepines | -0.19 | 0.10 | -1.99 | .047*             | -0.38 | 0.00 | -0.08 |
| Action Val. | ← | Inhalants       | -0.03 | 0.07 | -0.40 | .693              | -0.17 | 0.11 | -0.01 |
| Action Val. | ← | Narcotics       | 0.19  | 0.12 | 1.60  | .109              | -0.04 | 0.43 | 0.06  |
| Action Val. | ← | Others          | -0.13 | 0.07 | -1.87 | .062 <sup>†</sup> | -0.28 | 0.01 | -0.06 |
| Action Val. | ← | Gender_1        | -0.01 | 0.12 | -0.08 | .938              | -0.24 | 0.22 | -0.01 |
| Action Val. | ← | Gender_2        | -0.05 | 0.12 | -0.42 | .674              | -0.28 | 0.18 | -0.05 |
| Action Val. | ← | Education_1     | 0.03  | 0.07 | 0.34  | .733              | -0.12 | 0.17 | 0.01  |
| Action Val. | ← | Education_2     | 0.09  | 0.05 | 1.63  | .102              | -0.02 | 0.19 | 0.07  |
| Action Val. | ← | Education_3     | 0.02  | 0.06 | 0.29  | .768              | -0.09 | 0.13 | 0.01  |
| Action Val. | ← | Education_4     | -0.01 | 0.05 | -0.25 | .806              | -0.10 | 0.08 | -0.01 |
| Action Val. | ← | Age             | 0.00  | 0.00 | -0.17 | .866              | 0.00  | 0.00 | -0.01 |
| Action Val. | ← | Religion        | 0.02  | 0.01 | 1.57  | .116              | 0.00  | 0.04 | 0.05  |
| Action Val. | ← | Conservatism    | 0.03  | 0.01 | 2.10  | .036*             | 0.00  | 0.06 | 0.07  |

*Note.* Enter notes. \*\*\* =  $p < .001$ , \*\* =  $p < .01$ , \* =  $p < .05$ , <sup>†</sup> =  $p < .10$

**Mediation analyses**

The following tables display results of the mediation analyses reported in the SOM I. Tables include all predictors assessed, including use of the various substance classes over the entire past week (not differentiating very recent and moderately recent use), as well the control variables specified in the pre-registration (some of which were dummy-coded).

Table 7

*Prediction of social fusion via social connectedness*

| Criterion     |   | Predictor       | b     | SE   | z     | p        | $CI_{lower}^{95\%}$ | $CI_{upper}^{95\%}$ | $\beta$ |
|---------------|---|-----------------|-------|------|-------|----------|---------------------|---------------------|---------|
| Social Con.   | ← | Psychedelics    | 0.34  | 0.13 | 2.55  | .011*    | 0.08                | 0.60                | 0.10    |
| Social Con.   | ← | Nicotine        | 0.13  | 0.12 | 1.10  | .270     | -0.10               | 0.37                | 0.04    |
| Social Con.   | ← | Alcohol         | -0.21 | 0.14 | -1.53 | .127     | -0.48               | 0.06                | -0.05   |
| Social Con.   | ← | Stimulants      | -0.16 | 0.15 | -1.13 | .259     | -0.45               | 0.12                | -0.04   |
| Social Con.   | ← | Euphorics       | 0.09  | 0.14 | 0.64  | .522     | -0.18               | 0.36                | 0.03    |
| Social Con.   | ← | Cannabinoids    | 0.18  | 0.12 | 1.48  | .139     | -0.06               | 0.42                | 0.06    |
| Social Con.   | ← | Benzodiazepines | -0.13 | 0.30 | -0.44 | .658     | -0.73               | 0.46                | -0.02   |
| Social Con.   | ← | Inhalants       | -0.08 | 0.22 | -0.37 | .710     | -0.52               | 0.36                | -0.01   |
| Social Con.   | ← | Narcotics       | 0.46  | 0.39 | 1.18  | .236     | -0.30               | 1.22                | 0.05    |
| Social Con.   | ← | Others          | -0.04 | 0.22 | -0.17 | .868     | -0.48               | 0.40                | -0.01   |
| Social Con.   | ← | Gender_1        | -0.01 | 0.38 | -0.03 | .980     | -0.75               | 0.73                | 0.00    |
| Social Con.   | ← | Gender_2        | 0.15  | 0.38 | 0.39  | .694     | -0.59               | 0.88                | 0.05    |
| Social Con.   | ← | Education_1     | -0.17 | 0.23 | -0.72 | .469     | -0.63               | 0.29                | -0.03   |
| Social Con.   | ← | Education_2     | -0.20 | 0.17 | -1.18 | .238     | -0.53               | 0.13                | -0.05   |
| Social Con.   | ← | Education_3     | -0.11 | 0.20 | -0.55 | .582     | -0.51               | 0.29                | -0.02   |
| Social Con.   | ← | Education_4     | -0.24 | 0.15 | -1.61 | .106     | -0.52               | 0.05                | -0.07   |
| Social Con.   | ← | Age             | 0.00  | 0.01 | -0.04 | .970     | -0.01               | 0.01                | 0.00    |
| Social Con.   | ← | Religion        | 0.10  | 0.03 | 2.96  | .003**   | 0.03                | 0.16                | 0.10    |
| Social Con.   | ← | Conservatism    | 0.01  | 0.05 | 0.12  | .901     | -0.08               | 0.10                | 0.00    |
| Social Fusion | ← | Social Con.     | 0.24  | 0.02 | 11.20 | <.001*** | 0.20                | 0.28                | 0.35    |
| Social Fusion | ← | Psychedelics    | 0.11  | 0.09 | 1.25  | .211     | -0.06               | 0.27                | 0.05    |
| Social Fusion | ← | Nicotine        | 0.07  | 0.08 | 0.91  | .364     | -0.08               | 0.22                | 0.03    |
| Social Fusion | ← | Alcohol         | -0.02 | 0.09 | -0.19 | .846     | -0.19               | 0.16                | -0.01   |

|               |    |                 |       |      |       |                   |       |      |       |
|---------------|----|-----------------|-------|------|-------|-------------------|-------|------|-------|
| Social Fusion | ←  | Stimulants      | 0.26  | 0.09 | 2.82  | .005**            | 0.08  | 0.44 | 0.10  |
| Social Fusion | ←  | Euphorics       | -0.01 | 0.09 | -0.12 | .908              | -0.19 | 0.16 | 0.00  |
| Social Fusion | ←  | Cannabinoids    | -0.02 | 0.08 | -0.30 | .763              | -0.18 | 0.13 | -0.01 |
| Social Fusion | ←  | Benzodiazepines | 0.04  | 0.20 | 0.18  | .856              | -0.35 | 0.42 | 0.01  |
| Social Fusion | ←  | Inhalants       | 0.08  | 0.14 | 0.56  | .577              | -0.20 | 0.36 | 0.02  |
| Social Fusion | ←  | Narcotics       | -0.42 | 0.25 | -1.69 | .092 <sup>†</sup> | -0.91 | 0.07 | -0.07 |
| Social Fusion | ←  | Others          | -0.25 | 0.14 | -1.76 | .079 <sup>†</sup> | -0.53 | 0.03 | -0.06 |
| Social Fusion | ←  | Gender_1        | -0.11 | 0.23 | -0.48 | .631              | -0.57 | 0.35 | -0.05 |
| Social Fusion | ←  | Gender_2        | -0.24 | 0.23 | -1.02 | .307              | -0.70 | 0.22 | -0.11 |
| Social Fusion | ←  | Education_1     | 0.27  | 0.15 | 1.78  | .075 <sup>†</sup> | -0.03 | 0.56 | 0.06  |
| Social Fusion | ←  | Education_2     | 0.38  | 0.11 | 3.51  | <.001***          | 0.17  | 0.59 | 0.15  |
| Social Fusion | ←  | Education_3     | 0.26  | 0.13 | 2.00  | .046*             | 0.01  | 0.52 | 0.07  |
| Social Fusion | ←  | Education_4     | 0.25  | 0.09 | 2.65  | .008**            | 0.06  | 0.43 | 0.11  |
| Social Fusion | ←  | Age             | 0.00  | 0.00 | -1.05 | .292              | -0.01 | 0.00 | -0.04 |
| Social Fusion | ←  | Religion        | 0.03  | 0.02 | 1.33  | .182              | -0.01 | 0.07 | 0.04  |
| Social Fusion | ←  | Conservatism    | -0.03 | 0.03 | -0.94 | .349              | -0.08 | 0.03 | -0.03 |
| Indirect      | on | SF              | 0.08  | 0.03 | 2.49  | .013*             | 0.02  | 0.15 | 0.03  |
| Direct        | on | SF              | 0.11  | 0.09 | 1.25  | .211              | -0.06 | 0.27 | 0.05  |
| Total         | on | SF              | 0.19  | 0.09 | 2.08  | .038*             | 0.01  | 0.37 | 0.08  |

*Note.* Indirect, direct, and total effects represent effects of psychedelic substance use on social fusion via social connectedness. \*\*\* =  $p < .001$ , \*\* =  $p < .01$ , \* =  $p < .05$ , <sup>†</sup> =  $p < .10$

Table 8

*Prediction of socio-centric perspective taking via social connectedness*

| Criterion   | Predictor         | b     | SE   | z     | p      | $CI_{lower}^{95\%}$ | $CI_{upper}^{95\%}$ | $\beta$ |
|-------------|-------------------|-------|------|-------|--------|---------------------|---------------------|---------|
| Social Con. | ← Psychedelics    | 0.36  | 0.12 | 2.90  | .004** | 0.12                | 0.60                | 0.10    |
| Social Con. | ← Nicotine        | 0.11  | 0.10 | 1.02  | .306   | -0.10               | 0.31                | 0.03    |
| Social Con. | ← Alcohol         | -0.20 | 0.12 | -1.63 | .104   | -0.43               | 0.04                | -0.05   |
| Social Con. | ← Stimulants      | -0.06 | 0.13 | -0.45 | .653   | -0.32               | 0.20                | -0.02   |
| Social Con. | ← Euphorics       | 0.10  | 0.13 | 0.80  | .423   | -0.15               | 0.35                | 0.03    |
| Social Con. | ← Cannabinoids    | 0.17  | 0.10 | 1.63  | .103   | -0.03               | 0.37                | 0.05    |
| Social Con. | ← Benzodiazepines | -0.16 | 0.27 | -0.58 | .563   | -0.70               | 0.38                | -0.02   |
| Social Con. | ← Inhalants       | -0.08 | 0.20 | -0.41 | .680   | -0.48               | 0.31                | -0.01   |
| Social Con. | ← Narcotics       | 0.33  | 0.34 | 0.97  | .331   | -0.33               | 0.98                | 0.03    |
| Social Con. | ← Others          | -0.06 | 0.21 | -0.27 | .784   | -0.46               | 0.35                | -0.01   |
| Social Con. | ← Gender_1        | -0.32 | 0.36 | -0.89 | .372   | -1.02               | 0.38                | -0.10   |
| Social Con. | ← Gender_2        | -0.03 | 0.36 | -0.08 | .936   | -0.73               | 0.67                | -0.01   |
| Social Con. | ← Education_1     | -0.06 | 0.21 | -0.26 | .792   | -0.47               | 0.36                | -0.01   |
| Social Con. | ← Education_2     | -0.08 | 0.15 | -0.55 | .586   | -0.37               | 0.21                | -0.02   |
| Social Con. | ← Education_3     | 0.04  | 0.16 | 0.25  | .806   | -0.27               | 0.35                | 0.01    |
| Social Con. | ← Education_4     | -0.16 | 0.13 | -1.28 | .200   | -0.41               | 0.09                | -0.05   |
| Social Con. | ← Age             | 0.01  | 0.00 | 2.19  | .029*  | 0.00                | 0.02                | 0.07    |
| Social Con. | ← Religion        | 0.08  | 0.03 | 2.76  | .006** | 0.02                | 0.13                | 0.08    |
| Social Con. | ← Conservatism    | 0.03  | 0.04 | 0.67  | .500   | -0.05               | 0.10                | 0.02    |
| PT          | ← Social Con.     | 0.00  | 0.01 | 0.43  | .667   | -0.01               | 0.02                | 0.01    |
| PT          | ← Psychedelics    | 0.06  | 0.03 | 1.97  | .048*  | 0.00                | 0.12                | 0.07    |
| PT          | ← Nicotine        | -0.04 | 0.03 | -1.50 | .135   | -0.09               | 0.01                | -0.05   |
| PT          | ← Alcohol         | 0.00  | 0.03 | -0.16 | .869   | -0.06               | 0.05                | -0.01   |

|          |    |                 |       |      |       |                   |       |       |       |
|----------|----|-----------------|-------|------|-------|-------------------|-------|-------|-------|
| PT       | ←  | Stimulants      | -0.01 | 0.03 | -0.38 | .706              | -0.08 | 0.05  | -0.01 |
| PT       | ←  | Euphorics       | 0.04  | 0.03 | 1.17  | .241              | -0.02 | 0.10  | 0.04  |
| PT       | ←  | Cannabinoids    | 0.00  | 0.03 | 0.15  | .884              | -0.05 | 0.05  | 0.00  |
| PT       | ←  | Benzodiazepines | 0.11  | 0.07 | 1.73  | .084 <sup>†</sup> | -0.02 | 0.24  | 0.06  |
| PT       | ←  | Inhalants       | -0.14 | 0.05 | -2.92 | .003**            | -0.24 | -0.05 | -0.10 |
| PT       | ←  | Narcotics       | -0.06 | 0.08 | -0.74 | .461              | -0.22 | 0.10  | -0.03 |
| PT       | ←  | Others          | -0.01 | 0.05 | -0.27 | .784              | -0.11 | 0.08  | -0.01 |
| PT       | ←  | Gender_1        | -0.05 | 0.08 | -0.65 | .518              | -0.21 | 0.11  | -0.07 |
| PT       | ←  | Gender_2        | -0.07 | 0.08 | -0.87 | .383              | -0.23 | 0.09  | -0.09 |
| PT       | ←  | Education_1     | 0.00  | 0.05 | 0.02  | .985              | -0.10 | 0.10  | 0.00  |
| PT       | ←  | Education_2     | 0.00  | 0.04 | 0.04  | .965              | -0.07 | 0.07  | 0.00  |
| PT       | ←  | Education_3     | 0.02  | 0.04 | 0.61  | .539              | -0.05 | 0.10  | 0.02  |
| PT       | ←  | Education_4     | 0.06  | 0.03 | 1.95  | .051 <sup>†</sup> | 0.00  | 0.12  | 0.08  |
| PT       | ←  | Age             | 0.00  | 0.00 | -0.14 | .891              | 0.00  | 0.00  | 0.00  |
| PT       | ←  | Religion        | 0.00  | 0.01 | 0.00  | .996              | -0.01 | 0.01  | 0.00  |
| PT       | ←  | Conservatism    | -0.01 | 0.01 | -0.67 | .506              | -0.03 | 0.01  | -0.02 |
| Indirect | on | PT              | 0.00  | 0.00 | 0.43  | .670              | 0.00  | 0.01  | 0.00  |
| Direct   | on | PT              | 0.06  | 0.03 | 1.97  | .048*             | 0.00  | 0.12  | 0.07  |
| Total    | on | PT              | 0.06  | 0.03 | 2.02  | .043*             | 0.00  | 0.12  | 0.07  |

*Note.* Indirect, direct, and total effects represent effects of psychedelic substance use on socio-centric perspective taking via social connectedness. \*\*\* =  $p < .001$ , \*\* =  $p < .01$ , \* =  $p < .05$ , <sup>†</sup> =  $p < .10$

**24h vs. week prior use of psychedelics**

The following tables show results differentiating between very recent (\_24) and moderately recent (\_week) use of psychedelic substances. As before, we also included variables indicating use of the other substance classe (not differentiating between very recent and moderately recent use; see analyses above), as well the co-variates specified in the pre-registration.

Table 9

*Prediction of social fusion (24h vs. last week)*

| Criterion     | Predictor             | b     | SE   | z     | p                 | $CI_{lower}^{95\%}$ | $CI_{upper}^{95\%}$ | $\beta$ |
|---------------|-----------------------|-------|------|-------|-------------------|---------------------|---------------------|---------|
| Social Fusion | ← Psychedelics (24h)  | 0.21  | 0.09 | 2.25  | .025*             | 0.03                | 0.40                | 0.08    |
| Social Fusion | ← Psychedelics (week) | 0.09  | 0.14 | 0.67  | .504              | -0.18               | 0.36                | 0.02    |
| Social Fusion | ← Nicotine            | 0.11  | 0.08 | 1.28  | .200              | -0.06               | 0.27                | 0.05    |
| Social Fusion | ← Alcohol             | -0.07 | 0.09 | -0.69 | .490              | -0.25               | 0.12                | -0.02   |
| Social Fusion | ← Stimulants          | 0.22  | 0.10 | 2.23  | .026*             | 0.03                | 0.41                | 0.09    |
| Social Fusion | ← Euphorics           | 0.01  | 0.10 | 0.13  | .898              | -0.17               | 0.20                | 0.01    |
| Social Fusion | ← Cannabinoids        | 0.02  | 0.08 | 0.24  | .811              | -0.14               | 0.18                | 0.01    |
| Social Fusion | ← Benzodiazepines     | 0.00  | 0.21 | 0.00  | .999              | -0.41               | 0.41                | 0.00    |
| Social Fusion | ← Inhalants           | 0.06  | 0.15 | 0.41  | .683              | -0.24               | 0.36                | 0.02    |
| Social Fusion | ← Narcotics           | -0.29 | 0.27 | -1.09 | .276              | -0.81               | 0.23                | -0.05   |
| Social Fusion | ← Others              | -0.25 | 0.15 | -1.66 | .098 <sup>†</sup> | -0.56               | 0.05                | -0.06   |
| Social Fusion | ← Gender_1            | -0.12 | 0.25 | -0.49 | .627              | -0.61               | 0.37                | -0.06   |
| Social Fusion | ← Gender_2            | -0.21 | 0.25 | -0.84 | .400              | -0.69               | 0.28                | -0.09   |
| Social Fusion | ← Education_1         | 0.22  | 0.16 | 1.36  | .173              | -0.10               | 0.53                | 0.05    |
| Social Fusion | ← Education_2         | 0.34  | 0.12 | 2.89  | .004**            | 0.11                | 0.56                | 0.13    |
| Social Fusion | ← Education_3         | 0.24  | 0.14 | 1.68  | .092 <sup>†</sup> | -0.04               | 0.51                | 0.06    |
| Social Fusion | ← Education_4         | 0.19  | 0.10 | 1.93  | .053 <sup>†</sup> | 0.00                | 0.39                | 0.09    |
| Social Fusion | ← Age                 | 0.00  | 0.00 | -0.89 | .372              | -0.01               | 0.00                | -0.03   |
| Social Fusion | ← Religion            | 0.05  | 0.02 | 2.31  | .021*             | 0.01                | 0.09                | 0.08    |
| Social Fusion | ← Conservatism        | -0.03 | 0.03 | -0.87 | .382              | -0.09               | 0.03                | -0.03   |
|               | $\Delta 24/week$      | 0.12  | 0.15 | 0.83  | .405              | -0.16               | 0.41                | 0.06    |

Note. Enter notes. \*\*\* =  $p < .001$ , \*\* =  $p < .01$ , \* =  $p < .05$ , <sup>†</sup> =  $p < .10$

Table 10

*Prediction of prosocial behavior in dictator game (24h vs. last week)*

| Criterion        | Predictor             | b     | SE   | z     | p                 | $CI_{lower}^{95\%}$ | $CI_{upper}^{95\%}$ | $\beta$ |
|------------------|-----------------------|-------|------|-------|-------------------|---------------------|---------------------|---------|
| Dictator         | ← Psychedelics (24h)  | 0.17  | 0.26 | 0.64  | .524              | -0.35               | 0.68                | 0.02    |
| Dictator         | ← Psychedelics (week) | -0.05 | 0.38 | -0.14 | .891              | -0.79               | 0.69                | 0.00    |
| Dictator         | ← Nicotine            | -0.08 | 0.21 | -0.36 | .722              | -0.49               | 0.34                | -0.01   |
| Dictator         | ← Alcohol             | -0.07 | 0.25 | -0.29 | .769              | -0.56               | 0.42                | -0.01   |
| Dictator         | ← Stimulants          | -0.25 | 0.27 | -0.90 | .369              | -0.79               | 0.29                | -0.03   |
| Dictator         | ← Euphorics           | 0.12  | 0.26 | 0.44  | .657              | -0.40               | 0.63                | 0.02    |
| Dictator         | ← Cannabinoids        | -0.26 | 0.22 | -1.22 | .223              | -0.69               | 0.16                | -0.04   |
| Dictator         | ← Benzodiazepines     | -0.01 | 0.54 | -0.02 | .987              | -1.07               | 1.06                | 0.00    |
| Dictator         | ← Inhalants           | -0.06 | 0.41 | -0.13 | .893              | -0.85               | 0.74                | 0.00    |
| Dictator         | ← Narcotics           | -0.81 | 0.66 | -1.23 | .218              | -2.09               | 0.48                | -0.04   |
| Dictator         | ← Others              | 0.52  | 0.41 | 1.26  | .206              | -0.29               | 1.33                | 0.04    |
| Dictator         | ← Gender_1            | -1.17 | 0.77 | -1.53 | .125              | -2.67               | 0.33                | -0.20   |
| Dictator         | ← Gender_2            | -1.61 | 0.77 | -2.11 | .035*             | -3.11               | -0.11               | -0.27   |
| Dictator         | ← Education_1         | -0.26 | 0.45 | -0.59 | .556              | -1.15               | 0.62                | -0.02   |
| Dictator         | ← Education_2         | 0.04  | 0.31 | 0.14  | .890              | -0.56               | 0.65                | 0.01    |
| Dictator         | ← Education_3         | -0.16 | 0.33 | -0.48 | .630              | -0.82               | 0.49                | -0.02   |
| Dictator         | ← Education_4         | 0.18  | 0.28 | 0.63  | .526              | -0.37               | 0.72                | 0.03    |
| Dictator         | ← Age                 | 0.02  | 0.01 | 2.16  | .031*             | 0.00                | 0.04                | 0.08    |
| Dictator         | ← Religion            | -0.02 | 0.06 | -0.41 | .680              | -0.14               | 0.09                | -0.01   |
| Dictator         | ← Conservatism        | -0.15 | 0.08 | -1.86 | .063 <sup>†</sup> | -0.31               | 0.01                | -0.06   |
| $\Delta 24/week$ |                       | 0.22  | 0.41 | 0.53  | .595              | -0.59               | 1.02                | 0.03    |

Note. Enter notes. \*\*\* =  $p < .001$ , \*\* =  $p < .01$ , \* =  $p < .05$ , <sup>†</sup> =  $p < .10$

Table 11

*Prediction of prosocial behavior in trust game (24h vs. last week)*

| Criterion        | Predictor             | b     | SE   | z     | p                 | $CI_{lower}^{95\%}$ | $CI_{upper}^{95\%}$ | $\beta$ |
|------------------|-----------------------|-------|------|-------|-------------------|---------------------|---------------------|---------|
| Trust            | ← Psychedelics (24h)  | 0.27  | 0.30 | 0.91  | .365              | -0.31               | 0.85                | 0.07    |
| Trust            | ← Psychedelics (week) | 0.30  | 0.28 | 1.10  | .273              | -0.24               | 0.84                | 0.09    |
| Trust            | ← Nicotine            | 0.14  | 0.19 | 0.71  | .478              | -0.24               | 0.51                | 0.06    |
| Trust            | ← Alcohol             | -0.16 | 0.22 | -0.75 | .453              | -0.59               | 0.26                | -0.06   |
| Trust            | ← Stimulants          | -0.16 | 0.24 | -0.67 | .503              | -0.63               | 0.31                | -0.06   |
| Trust            | ← Euphorics           | -0.19 | 0.24 | -0.82 | .414              | -0.66               | 0.27                | -0.07   |
| Trust            | ← Cannabinoids        | -0.04 | 0.18 | -0.24 | .810              | -0.40               | 0.31                | -0.02   |
| Trust            | ← Benzodiazepines     | 0.41  | 0.78 | 0.52  | .602              | -1.13               | 1.94                | 0.06    |
| Trust            | ← Inhalants           | 0.78  | 0.40 | 1.97  | .049*             | 0.00                | 1.55                | 0.15    |
| Trust            | ← Narcotics           | -2.13 | 1.03 | -2.08 | .038*             | -4.15               | -0.12               | -0.21   |
| Trust            | ← Others              | 0.65  | 0.51 | 1.28  | .201              | -0.35               | 1.64                | 0.10    |
| Trust            | ← Gender_1            | -0.44 | 0.48 | -0.91 | .363              | -1.38               | 0.51                | -0.21   |
| Trust            | ← Gender_2            | -0.77 | 0.48 | -1.61 | .107              | -1.72               | 0.17                | -0.36   |
| Trust            | ← Education_1         | 0.04  | 0.34 | 0.11  | .912              | -0.63               | 0.71                | 0.01    |
| Trust            | ← Education_2         | -0.06 | 0.27 | -0.21 | .831              | -0.58               | 0.47                | -0.02   |
| Trust            | ← Education_3         | -0.61 | 0.32 | -1.91 | .056 <sup>†</sup> | -1.24               | 0.02                | -0.15   |
| Trust            | ← Education_4         | 0.31  | 0.19 | 1.63  | .102              | -0.06               | 0.67                | 0.14    |
| Trust            | ← Age                 | 0.00  | 0.01 | 0.70  | .485              | -0.01               | 0.02                | 0.06    |
| Trust            | ← Religion            | 0.07  | 0.05 | 1.41  | .158              | -0.03               | 0.18                | 0.10    |
| Trust            | ← Conservatism        | -0.04 | 0.07 | -0.55 | .579              | -0.18               | 0.10                | -0.04   |
| $\Delta 24/week$ |                       | -0.04 | 0.34 | -0.10 | .918              | -0.70               | 0.63                | -0.02   |

Note. Enter notes. \*\*\* =  $p < .001$ , \*\* =  $p < .01$ , \* =  $p < .05$ , <sup>†</sup> =  $p < .10$

Table 12

*Prediction of prosocial behavior on give-to-a-stranger item (24h vs. last week)*

| Criterion       | Predictor             | b     | SE   | z     | p                 | $CI_{lower}^{95\%}$ | $CI_{upper}^{95\%}$ | $\beta$ |
|-----------------|-----------------------|-------|------|-------|-------------------|---------------------|---------------------|---------|
| Give-A-Stranger | ← Psychedelics (24h)  | 0.04  | 0.09 | 0.44  | .661              | -0.13               | 0.21                | 0.02    |
| Give-A-Stranger | ← Psychedelics (week) | 0.13  | 0.12 | 1.04  | .299              | -0.12               | 0.37                | 0.03    |
| Give-A-Stranger | ← Nicotine            | 0.07  | 0.07 | 0.99  | .321              | -0.07               | 0.21                | 0.03    |
| Give-A-Stranger | ← Alcohol             | -0.08 | 0.08 | -1.02 | .308              | -0.25               | 0.08                | -0.03   |
| Give-A-Stranger | ← Stimulants          | -0.10 | 0.09 | -1.17 | .242              | -0.28               | 0.07                | -0.04   |
| Give-A-Stranger | ← Euphorics           | 0.09  | 0.09 | 1.00  | .319              | -0.08               | 0.26                | 0.04    |
| Give-A-Stranger | ← Cannabinoids        | 0.08  | 0.07 | 1.16  | .248              | -0.06               | 0.22                | 0.04    |
| Give-A-Stranger | ← Benzodiazepines     | -0.21 | 0.19 | -1.10 | .273              | -0.57               | 0.16                | -0.04   |
| Give-A-Stranger | ← Inhalants           | -0.10 | 0.14 | -0.72 | .469              | -0.38               | 0.17                | -0.03   |
| Give-A-Stranger | ← Narcotics           | 0.25  | 0.23 | 1.09  | .274              | -0.20               | 0.71                | 0.04    |
| Give-A-Stranger | ← Others              | 0.01  | 0.14 | 0.11  | .916              | -0.26               | 0.29                | 0.00    |
| Give-A-Stranger | ← Gender_1            | 0.01  | 0.23 | 0.04  | .967              | -0.44               | 0.46                | 0.00    |
| Give-A-Stranger | ← Gender_2            | -0.02 | 0.23 | -0.08 | .933              | -0.46               | 0.43                | -0.01   |
| Give-A-Stranger | ← Education_1         | 0.02  | 0.15 | 0.14  | .892              | -0.27               | 0.30                | 0.00    |
| Give-A-Stranger | ← Education_2         | 0.07  | 0.10 | 0.65  | .518              | -0.13               | 0.26                | 0.03    |
| Give-A-Stranger | ← Education_3         | -0.14 | 0.11 | -1.27 | .204              | -0.35               | 0.07                | -0.05   |
| Give-A-Stranger | ← Education_4         | 0.07  | 0.09 | 0.76  | .449              | -0.11               | 0.25                | 0.03    |
| Give-A-Stranger | ← Age                 | 0.01  | 0.00 | 4.52  | <.001***          | 0.01                | 0.02                | 0.16    |
| Give-A-Stranger | ← Religion            | 0.02  | 0.02 | 0.92  | .360              | -0.02               | 0.06                | 0.03    |
| Give-A-Stranger | ← Conservatism        | -0.04 | 0.03 | -1.66 | .096 <sup>†</sup> | -0.10               | 0.01                | -0.05   |

Note. Enter notes. \*\*\* =  $p < .001$ , \*\* =  $p < .01$ , \* =  $p < .05$ , <sup>†</sup> =  $p < .10$

Table 13

*Prediction of sociocentric perspective in E-Task (24h vs. last week)*

| Criterion        | Predictor             | b     | SE   | z     | p                 | $CI_{lower}^{95\%}$ | $CI_{upper}^{95\%}$ | $\beta$ |
|------------------|-----------------------|-------|------|-------|-------------------|---------------------|---------------------|---------|
| PT               | ← Psychedelics (24h)  | 0.05  | 0.03 | 1.61  | .107              | -0.01               | 0.11                | 0.05    |
| PT               | ← Psychedelics (week) | 0.07  | 0.04 | 1.59  | .112              | -0.02               | 0.15                | 0.05    |
| PT               | ← Nicotine            | -0.04 | 0.03 | -1.47 | .143              | -0.09               | 0.01                | -0.05   |
| PT               | ← Alcohol             | -0.01 | 0.03 | -0.20 | .840              | -0.06               | 0.05                | -0.01   |
| PT               | ← Stimulants          | -0.01 | 0.03 | -0.35 | .726              | -0.07               | 0.05                | -0.01   |
| PT               | ← Euphorics           | 0.04  | 0.03 | 1.17  | .241              | -0.02               | 0.10                | 0.04    |
| PT               | ← Cannabinoids        | 0.00  | 0.03 | 0.17  | .861              | -0.05               | 0.05                | 0.01    |
| PT               | ← Benzodiazepines     | 0.12  | 0.07 | 1.75  | .081 <sup>†</sup> | -0.01               | 0.24                | 0.06    |
| PT               | ← Inhalants           | -0.14 | 0.05 | -2.92 | .004**            | -0.24               | -0.05               | -0.10   |
| PT               | ← Narcotics           | -0.06 | 0.08 | -0.73 | .466              | -0.22               | 0.10                | -0.03   |
| PT               | ← Others              | -0.02 | 0.05 | -0.31 | .757              | -0.11               | 0.08                | -0.01   |
| PT               | ← Gender_1            | -0.05 | 0.08 | -0.66 | .508              | -0.21               | 0.11                | -0.07   |
| PT               | ← Gender_2            | -0.07 | 0.08 | -0.87 | .382              | -0.23               | 0.09                | -0.10   |
| PT               | ← Education_1         | 0.00  | 0.05 | 0.04  | .967              | -0.10               | 0.10                | 0.00    |
| PT               | ← Education_2         | 0.00  | 0.04 | 0.06  | .951              | -0.07               | 0.07                | 0.00    |
| PT               | ← Education_3         | 0.03  | 0.04 | 0.65  | .517              | -0.05               | 0.10                | 0.02    |
| PT               | ← Education_4         | 0.06  | 0.03 | 1.96  | .050*             | 0.00                | 0.12                | 0.08    |
| PT               | ← Age                 | 0.00  | 0.00 | -0.11 | .910              | 0.00                | 0.00                | 0.00    |
| PT               | ← Religion            | 0.00  | 0.01 | 0.05  | .961              | -0.01               | 0.01                | 0.00    |
| PT               | ← Conservatism        | -0.01 | 0.01 | -0.67 | .503              | -0.03               | 0.01                | -0.02   |
| $\Delta 24/week$ |                       | -0.02 | 0.05 | -0.37 | .713              | -0.11               | 0.07                | 0.00    |

Note. Enter notes. \*\*\* =  $p < .001$ , \*\* =  $p < .01$ , \* =  $p < .05$ , <sup>†</sup> =  $p < .10$

Table 14

*Prediction of both action and outcome valuation in judgments of moral praiseworthiness (24h vs. last week)*

| Criterion    |   | Predictor           | b     | SE   | z     | p                 | $CI_{lower}^{95\%}$ | $CI_{upper}^{95\%}$ | $\beta$ |
|--------------|---|---------------------|-------|------|-------|-------------------|---------------------|---------------------|---------|
| Outcome Val. | ← | Psychedelics (24h)  | -0.03 | 0.05 | -0.52 | .603              | -0.12               | 0.07                | -0.02   |
| Outcome Val. | ← | Psychedelics (week) | -0.11 | 0.07 | -1.52 | .128              | -0.25               | 0.03                | -0.05   |
| Outcome Val. | ← | Nicotine            | 0.05  | 0.04 | 1.15  | .252              | -0.03               | 0.13                | 0.04    |
| Outcome Val. | ← | Alcohol             | 0.09  | 0.05 | 1.88  | .060 <sup>†</sup> | 0.00                | 0.18                | 0.06    |
| Outcome Val. | ← | Stimulants          | -0.10 | 0.05 | -2.05 | .040*             | -0.21               | 0.00                | -0.07   |
| Outcome Val. | ← | Euphorics           | 0.02  | 0.05 | 0.47  | .636              | -0.07               | 0.12                | 0.02    |
| Outcome Val. | ← | Cannabinoids        | -0.10 | 0.04 | -2.52 | .012*             | -0.18               | -0.02               | -0.09   |
| Outcome Val. | ← | Benzodiazepines     | -0.04 | 0.11 | -0.41 | .682              | -0.25               | 0.16                | -0.02   |
| Outcome Val. | ← | Inhalants           | 0.15  | 0.08 | 1.83  | .067 <sup>†</sup> | -0.01               | 0.30                | 0.06    |
| Outcome Val. | ← | Narcotics           | -0.12 | 0.13 | -0.93 | .354              | -0.38               | 0.14                | -0.03   |
| Outcome Val. | ← | Others              | 0.12  | 0.08 | 1.50  | .135              | -0.04               | 0.27                | 0.05    |
| Outcome Val. | ← | Gender_1            | 0.10  | 0.13 | 0.80  | .426              | -0.15               | 0.35                | 0.09    |
| Outcome Val. | ← | Gender_2            | 0.00  | 0.13 | -0.01 | .991              | -0.25               | 0.25                | 0.00    |
| Outcome Val. | ← | Education_1         | -0.10 | 0.08 | -1.21 | .224              | -0.26               | 0.06                | -0.04   |
| Outcome Val. | ← | Education_2         | -0.13 | 0.06 | -2.20 | .028*             | -0.24               | -0.01               | -0.09   |
| Outcome Val. | ← | Education_3         | 0.06  | 0.06 | 0.98  | .329              | -0.06               | 0.18                | 0.04    |
| Outcome Val. | ← | Education_4         | 0.00  | 0.05 | -0.05 | .964              | -0.10               | 0.10                | 0.00    |
| Outcome Val. | ← | Age                 | 0.00  | 0.00 | 2.58  | .010**            | 0.00                | 0.01                | 0.09    |
| Outcome Val. | ← | Religion            | -0.03 | 0.01 | -2.53 | .011*             | -0.05               | -0.01               | -0.08   |
| Outcome Val. | ← | Conservatism        | 0.02  | 0.02 | 1.49  | .136              | -0.01               | 0.05                | 0.05    |
| Action Val.  | ← | Psychedelics (24h)  | -0.02 | 0.05 | -0.41 | .685              | -0.11               | 0.07                | -0.01   |
| Action Val.  | ← | Psychedelics (week) | 0.08  | 0.07 | 1.25  | .211              | -0.05               | 0.21                | 0.04    |

|                  |     |                 |       |      |       |                   |       |      |       |
|------------------|-----|-----------------|-------|------|-------|-------------------|-------|------|-------|
| Action Val.      | ←   | Nicotine        | -0.05 | 0.04 | -1.24 | .216              | -0.12 | 0.03 | -0.04 |
| Action Val.      | ←   | Alcohol         | -0.02 | 0.04 | -0.52 | .605              | -0.11 | 0.06 | -0.02 |
| Action Val.      | ←   | Stimulants      | 0.07  | 0.05 | 1.52  | .129              | -0.02 | 0.16 | 0.06  |
| Action Val.      | ←   | Euphorics       | 0.03  | 0.05 | 0.60  | .551              | -0.06 | 0.12 | 0.02  |
| Action Val.      | ←   | Cannabinoids    | 0.10  | 0.04 | 2.56  | .010*             | 0.02  | 0.17 | 0.09  |
| Action Val.      | ←   | Benzodiazepines | -0.19 | 0.10 | -1.96 | .050 <sup>†</sup> | -0.38 | 0.00 | -0.07 |
| Action Val.      | ←   | Inhalants       | -0.03 | 0.07 | -0.41 | .681              | -0.17 | 0.11 | -0.01 |
| Action Val.      | ←   | Narcotics       | 0.18  | 0.12 | 1.52  | .128              | -0.05 | 0.42 | 0.06  |
| Action Val.      | ←   | Others          | -0.14 | 0.07 | -1.96 | .050 <sup>†</sup> | -0.28 | 0.00 | -0.06 |
| Action Val.      | ←   | Gender_1        | 0.00  | 0.12 | -0.03 | .976              | -0.23 | 0.23 | 0.00  |
| Action Val.      | ←   | Gender_2        | -0.04 | 0.12 | -0.37 | .713              | -0.27 | 0.19 | -0.04 |
| Action Val.      | ←   | Education_1     | 0.04  | 0.08 | 0.47  | .641              | -0.11 | 0.18 | 0.02  |
| Action Val.      | ←   | Education_2     | 0.09  | 0.05 | 1.72  | .085 <sup>†</sup> | -0.01 | 0.20 | 0.07  |
| Action Val.      | ←   | Education_3     | 0.02  | 0.06 | 0.40  | .686              | -0.09 | 0.13 | 0.02  |
| Action Val.      | ←   | Education_4     | -0.01 | 0.05 | -0.14 | .885              | -0.10 | 0.09 | -0.01 |
| Action Val.      | ←   | Age             | 0.00  | 0.00 | -0.17 | .864              | 0.00  | 0.00 | -0.01 |
| Action Val.      | ←   | Religion        | 0.02  | 0.01 | 1.59  | .111              | 0.00  | 0.04 | 0.05  |
| Action Val.      | ←   | Conservatism    | 0.03  | 0.01 | 2.10  | .035*             | 0.00  | 0.06 | 0.07  |
| $\Delta 24/week$ | for | Action Val.     | -0.10 | 0.07 | -1.43 | .154              | -0.24 | 0.04 | -0.06 |
| $\Delta 24/week$ | for | Outcome Val.    | 0.08  | 0.08 | 1.08  | .278              | -0.07 | 0.23 | 0.03  |

Note. Enter notes. \*\*\* =  $p < .001$ , \*\* =  $p < .01$ , \* =  $p < .05$ , <sup>†</sup> =  $p < .10$

**Mediation analyses (24h vs. week prior)**

The following tables show results of the mediation analyses reported in the SOM I, differentiating between very recent (last 24h) and moderately recent (last week) use of psychedelic substances.

Table 15

*Prediction of social fusion via social connectedness (24h vs. last week)*

| Criterion     |   | Predictor           | b     | SE   | z     | p        | $CI_{lower}^{95\%}$ | $CI_{upper}^{95\%}$ | $\beta$ |
|---------------|---|---------------------|-------|------|-------|----------|---------------------|---------------------|---------|
| Social Con.   | ← | Psychedelics (24h)  | 0.30  | 0.14 | 2.16  | .031*    | 0.03                | 0.57                | 0.08    |
| Social Con.   | ← | Psychedelics (week) | 0.42  | 0.20 | 2.06  | .040*    | 0.02                | 0.81                | 0.07    |
| Social Con.   | ← | Nicotine            | 0.14  | 0.12 | 1.12  | .264     | -0.10               | 0.37                | 0.04    |
| Social Con.   | ← | Alcohol             | -0.21 | 0.14 | -1.53 | .125     | -0.48               | 0.06                | -0.06   |
| Social Con.   | ← | Stimulants          | -0.16 | 0.15 | -1.12 | .263     | -0.45               | 0.12                | -0.04   |
| Social Con.   | ← | Euphorics           | 0.09  | 0.14 | 0.62  | .536     | -0.19               | 0.36                | 0.02    |
| Social Con.   | ← | Cannabinoids        | 0.18  | 0.12 | 1.47  | .142     | -0.06               | 0.42                | 0.06    |
| Social Con.   | ← | Benzodiazepines     | -0.13 | 0.30 | -0.41 | .680     | -0.72               | 0.47                | -0.02   |
| Social Con.   | ← | Inhalants           | -0.08 | 0.22 | -0.38 | .707     | -0.52               | 0.35                | -0.01   |
| Social Con.   | ← | Narcotics           | 0.46  | 0.39 | 1.17  | .241     | -0.31               | 1.22                | 0.05    |
| Social Con.   | ← | Others              | -0.05 | 0.22 | -0.22 | .824     | -0.49               | 0.39                | -0.01   |
| Social Con.   | ← | Gender_1            | -0.01 | 0.38 | -0.01 | .989     | -0.74               | 0.73                | 0.00    |
| Social Con.   | ← | Gender_2            | 0.15  | 0.38 | 0.41  | .683     | -0.58               | 0.89                | 0.05    |
| Social Con.   | ← | Education_1         | -0.16 | 0.24 | -0.67 | .503     | -0.62               | 0.30                | -0.03   |
| Social Con.   | ← | Education_2         | -0.19 | 0.17 | -1.15 | .252     | -0.52               | 0.14                | -0.05   |
| Social Con.   | ← | Education_3         | -0.10 | 0.20 | -0.50 | .620     | -0.50               | 0.30                | -0.02   |
| Social Con.   | ← | Education_4         | -0.23 | 0.15 | -1.56 | .120     | -0.52               | 0.06                | -0.07   |
| Social Con.   | ← | Age                 | 0.00  | 0.01 | -0.04 | .968     | -0.01               | 0.01                | 0.00    |
| Social Con.   | ← | Religion            | 0.10  | 0.03 | 2.97  | .003**   | 0.03                | 0.16                | 0.10    |
| Social Con.   | ← | Conservatism        | 0.00  | 0.05 | 0.11  | .915     | -0.08               | 0.09                | 0.00    |
| Social Fusion | ← | Social Con.         | 0.24  | 0.02 | 11.23 | <.001*** | 0.20                | 0.28                | 0.35    |
| Social Fusion | ← | Psychedelics (24h)  | 0.14  | 0.09 | 1.55  | .121     | -0.04               | 0.31                | 0.05    |
| Social Fusion | ← | Psychedelics (week) | -0.01 | 0.13 | -0.09 | .927     | -0.26               | 0.24                | 0.00    |

|               |    |                 |       |      |       |                   |       |      |       |
|---------------|----|-----------------|-------|------|-------|-------------------|-------|------|-------|
| Social Fusion | ←  | Nicotine        | 0.07  | 0.08 | 0.92  | .357              | -0.08 | 0.23 | 0.03  |
| Social Fusion | ←  | Alcohol         | -0.01 | 0.09 | -0.17 | .868              | -0.19 | 0.16 | -0.01 |
| Social Fusion | ←  | Stimulants      | 0.26  | 0.09 | 2.82  | .005**            | 0.08  | 0.44 | 0.10  |
| Social Fusion | ←  | Euphorics       | -0.01 | 0.09 | -0.07 | .945              | -0.18 | 0.17 | 0.00  |
| Social Fusion | ←  | Cannabinoids    | -0.03 | 0.08 | -0.33 | .740              | -0.18 | 0.13 | -0.01 |
| Social Fusion | ←  | Benzodiazepines | 0.03  | 0.20 | 0.16  | .873              | -0.35 | 0.42 | 0.01  |
| Social Fusion | ←  | Inhalants       | 0.08  | 0.14 | 0.57  | .571              | -0.20 | 0.36 | 0.02  |
| Social Fusion | ←  | Narcotics       | -0.40 | 0.25 | -1.60 | .109              | -0.89 | 0.09 | -0.06 |
| Social Fusion | ←  | Others          | -0.24 | 0.14 | -1.69 | .091 <sup>†</sup> | -0.53 | 0.04 | -0.06 |
| Social Fusion | ←  | Gender_1        | -0.12 | 0.23 | -0.51 | .607              | -0.58 | 0.34 | -0.05 |
| Social Fusion | ←  | Gender_2        | -0.25 | 0.23 | -1.06 | .291              | -0.70 | 0.21 | -0.11 |
| Social Fusion | ←  | Education_1     | 0.25  | 0.15 | 1.66  | .096 <sup>†</sup> | -0.04 | 0.55 | 0.06  |
| Social Fusion | ←  | Education_2     | 0.37  | 0.11 | 3.44  | <.001***          | 0.16  | 0.59 | 0.14  |
| Social Fusion | ←  | Education_3     | 0.25  | 0.13 | 1.94  | .052 <sup>†</sup> | 0.00  | 0.51 | 0.07  |
| Social Fusion | ←  | Education_4     | 0.24  | 0.09 | 2.58  | .010**            | 0.06  | 0.43 | 0.11  |
| Social Fusion | ←  | Age             | 0.00  | 0.00 | -1.02 | .309              | -0.01 | 0.00 | -0.04 |
| Social Fusion | ←  | Religion        | 0.03  | 0.02 | 1.29  | .197              | -0.01 | 0.07 | 0.04  |
| Social Fusion | ←  | Conservatism    | -0.03 | 0.03 | -0.95 | .342              | -0.09 | 0.03 | -0.03 |
| Indirect      | on | SF              | 0.07  | 0.03 | 2.12  | .034*             | 0.01  | 0.14 | 0.03  |
| Direct        | on | SF              | 0.14  | 0.09 | 1.55  | .121              | -0.04 | 0.31 | 0.05  |
| Total         | on | SF              | 0.21  | 0.09 | 2.22  | .026*             | 0.02  | 0.40 | 0.08  |

*Note.* Indirect, direct, and total effects represent effects of psychedelic substance use on social fusion via social connectedness (24h vs. last week) \*\*\* =  $p < .001$ , \*\* =  $p < .01$ , \* =  $p < .05$ , <sup>†</sup> =  $p < .10$

Table 16

*Prediction of socio-centric perspective taking via social connectedness (24h vs. last week)*

| Criterion   | Predictor             | b     | SE   | z     | p      | $CI_{lower}^{95\%}$ | $CI_{upper}^{95\%}$ | $\beta$ |
|-------------|-----------------------|-------|------|-------|--------|---------------------|---------------------|---------|
| Social Con. | ← Psychedelics (24h)  | 0.36  | 0.13 | 2.76  | .006** | 0.10                | 0.62                | 0.09    |
| Social Con. | ← Psychedelics (week) | 0.28  | 0.18 | 1.56  | .120   | -0.07               | 0.63                | 0.05    |
| Social Con. | ← Nicotine            | 0.11  | 0.10 | 1.05  | .296   | -0.10               | 0.31                | 0.03    |
| Social Con. | ← Alcohol             | -0.19 | 0.12 | -1.62 | .105   | -0.43               | 0.04                | -0.05   |
| Social Con. | ← Stimulants          | -0.06 | 0.13 | -0.44 | .663   | -0.32               | 0.20                | -0.02   |
| Social Con. | ← Euphorics           | 0.11  | 0.13 | 0.85  | .396   | -0.14               | 0.36                | 0.03    |
| Social Con. | ← Cannabinoids        | 0.17  | 0.10 | 1.61  | .107   | -0.04               | 0.37                | 0.05    |
| Social Con. | ← Benzodiazepines     | -0.16 | 0.27 | -0.58 | .564   | -0.70               | 0.38                | -0.02   |
| Social Con. | ← Inhalants           | -0.08 | 0.20 | -0.40 | .687   | -0.48               | 0.31                | -0.01   |
| Social Con. | ← Narcotics           | 0.33  | 0.34 | 1.00  | .319   | -0.32               | 0.99                | 0.04    |
| Social Con. | ← Others              | -0.05 | 0.21 | -0.26 | .795   | -0.46               | 0.35                | -0.01   |
| Social Con. | ← Gender_1            | -0.33 | 0.36 | -0.91 | .361   | -1.02               | 0.37                | -0.10   |
| Social Con. | ← Gender_2            | -0.04 | 0.36 | -0.11 | .916   | -0.74               | 0.66                | -0.01   |
| Social Con. | ← Education_1         | -0.06 | 0.21 | -0.30 | .762   | -0.48               | 0.35                | -0.01   |
| Social Con. | ← Education_2         | -0.08 | 0.15 | -0.57 | .567   | -0.37               | 0.20                | -0.02   |
| Social Con. | ← Education_3         | 0.03  | 0.16 | 0.22  | .826   | -0.28               | 0.35                | 0.01    |
| Social Con. | ← Education_4         | -0.17 | 0.13 | -1.30 | .192   | -0.42               | 0.08                | -0.05   |
| Social Con. | ← Age                 | 0.01  | 0.00 | 2.21  | .027*  | 0.00                | 0.02                | 0.07    |
| Social Con. | ← Religion            | 0.08  | 0.03 | 2.75  | .006** | 0.02                | 0.13                | 0.08    |
| Social Con. | ← Conservatism        | 0.03  | 0.04 | 0.67  | .504   | -0.05               | 0.10                | 0.02    |
| PT          | ← Social Con.         | 0.00  | 0.01 | 0.44  | .660   | -0.01               | 0.02                | 0.01    |
| PT          | ← Psychedelics (24h)  | 0.05  | 0.03 | 1.57  | .117   | -0.01               | 0.11                | 0.05    |
| PT          | ← Psychedelics (week) | 0.07  | 0.04 | 1.57  | .117   | -0.02               | 0.15                | 0.05    |

|          |    |                 |       |      |       |                    |       |       |       |
|----------|----|-----------------|-------|------|-------|--------------------|-------|-------|-------|
| PT       | ←  | Nicotine        | -0.04 | 0.03 | -1.48 | .139               | -0.09 | 0.01  | -0.05 |
| PT       | ←  | Alcohol         | -0.01 | 0.03 | -0.18 | .858               | -0.06 | 0.05  | -0.01 |
| PT       | ←  | Stimulants      | -0.01 | 0.03 | -0.35 | .729               | -0.07 | 0.05  | -0.01 |
| PT       | ←  | Euphorics       | 0.04  | 0.03 | 1.16  | .246               | -0.02 | 0.10  | 0.04  |
| PT       | ←  | Cannabinoids    | 0.00  | 0.03 | 0.16  | .875               | -0.05 | 0.05  | 0.01  |
| PT       | ←  | Benzodiazepines | 0.12  | 0.07 | 1.75  | .079 <sup>†</sup>  | -0.01 | 0.25  | 0.06  |
| PT       | ←  | Inhalants       | -0.14 | 0.05 | -2.92 | .004 <sup>**</sup> | -0.24 | -0.05 | -0.10 |
| PT       | ←  | Narcotics       | -0.06 | 0.08 | -0.74 | .458               | -0.22 | 0.10  | -0.03 |
| PT       | ←  | Others          | -0.02 | 0.05 | -0.31 | .760               | -0.11 | 0.08  | -0.01 |
| PT       | ←  | Gender_1        | -0.05 | 0.08 | -0.65 | .518               | -0.21 | 0.11  | -0.07 |
| PT       | ←  | Gender_2        | -0.07 | 0.08 | -0.87 | .383               | -0.23 | 0.09  | -0.09 |
| PT       | ←  | Education_1     | 0.00  | 0.05 | 0.04  | .965               | -0.10 | 0.10  | 0.00  |
| PT       | ←  | Education_2     | 0.00  | 0.04 | 0.07  | .945               | -0.07 | 0.07  | 0.00  |
| PT       | ←  | Education_3     | 0.02  | 0.04 | 0.64  | .522               | -0.05 | 0.10  | 0.02  |
| PT       | ←  | Education_4     | 0.06  | 0.03 | 1.98  | .048 <sup>*</sup>  | 0.00  | 0.12  | 0.08  |
| PT       | ←  | Age             | 0.00  | 0.00 | -0.14 | .890               | 0.00  | 0.00  | 0.00  |
| PT       | ←  | Religion        | 0.00  | 0.01 | 0.00  | .997               | -0.01 | 0.01  | 0.00  |
| PT       | ←  | Conservatism    | -0.01 | 0.01 | -0.68 | .499               | -0.03 | 0.01  | -0.02 |
| Indirect | on | PT              | 0.00  | 0.00 | 0.43  | .664               | 0.00  | 0.01  | 0.00  |
| Direct   | on | PT              | 0.05  | 0.03 | 1.57  | .117               | -0.01 | 0.11  | 0.05  |
| Total    | on | PT              | 0.05  | 0.03 | 1.61  | .108               | -0.01 | 0.11  | 0.05  |

*Note.* Indirect, direct, and total effects represent effects of psychedelic substance use on socio-centric perspective taking via social connectedness (24h vs. last week) \*\*\* =  $p < .001$ , \*\* =  $p < .01$ , \* =  $p < .05$ , † =  $p < .10$

**24h use of substances only**

The following tables show results of the SOM I analyses, including only very recent (24h) use of the different substances as predictor variables. Also included are the co-variates specified in the pre-registration.

Table 17

*Prediction of social fusion (24h only)*

| Criterion     | Predictor               | b     | SE   | z     | p                 | $CI_{lower}^{95\%}$ | $CI_{upper}^{95\%}$ | $\beta$ |
|---------------|-------------------------|-------|------|-------|-------------------|---------------------|---------------------|---------|
| Social Fusion | ← Psychedelics (24h)    | 0.19  | 0.09 | 2.05  | .040*             | 0.01                | 0.37                | 0.07    |
| Social Fusion | ← Nicotine (24h)        | 0.08  | 0.08 | 0.99  | .322              | -0.08               | 0.25                | 0.04    |
| Social Fusion | ← Alcohol (24h)         | 0.02  | 0.08 | 0.24  | .808              | -0.14               | 0.18                | 0.01    |
| Social Fusion | ← Stimulants (24h)      | 0.22  | 0.11 | 2.03  | .042*             | 0.01                | 0.44                | 0.08    |
| Social Fusion | ← Euphorics (24h)       | 0.01  | 0.11 | 0.12  | .902              | -0.19               | 0.22                | 0.00    |
| Social Fusion | ← Cannabinoids (24h)    | 0.08  | 0.08 | 0.98  | .326              | -0.08               | 0.24                | 0.04    |
| Social Fusion | ← Benzodiazepines (24h) | 0.13  | 0.25 | 0.52  | .604              | -0.36               | 0.63                | 0.02    |
| Social Fusion | ← Inhalants (24h)       | 0.18  | 0.20 | 0.90  | .366              | -0.21               | 0.57                | 0.03    |
| Social Fusion | ← Narcotics (24h)       | -0.44 | 0.38 | -1.13 | .257              | -1.19               | 0.32                | -0.05   |
| Social Fusion | ← Others (24h)          | -0.32 | 0.18 | -1.74 | .083 <sup>†</sup> | -0.68               | 0.04                | -0.06   |
| Social Fusion | ← Gender_1              | -0.13 | 0.25 | -0.54 | .593              | -0.62               | 0.35                | -0.06   |
| Social Fusion | ← Gender_2              | -0.22 | 0.25 | -0.88 | .381              | -0.70               | 0.27                | -0.10   |
| Social Fusion | ← Education_1           | 0.20  | 0.16 | 1.24  | .214              | -0.12               | 0.52                | 0.05    |
| Social Fusion | ← Education_2           | 0.33  | 0.12 | 2.87  | .004**            | 0.11                | 0.56                | 0.13    |
| Social Fusion | ← Education_3           | 0.22  | 0.14 | 1.59  | .112              | -0.05               | 0.50                | 0.06    |
| Social Fusion | ← Education_4           | 0.20  | 0.10 | 1.94  | .052 <sup>†</sup> | 0.00                | 0.39                | 0.09    |
| Social Fusion | ← Age                   | 0.00  | 0.00 | -0.92 | .360              | -0.01               | 0.00                | -0.03   |
| Social Fusion | ← Religion              | 0.05  | 0.02 | 2.42  | .015*             | 0.01                | 0.10                | 0.08    |
| Social Fusion | ← Conservatism          | -0.03 | 0.03 | -0.99 | .322              | -0.09               | 0.03                | -0.03   |

*Note.* Enter notes. \*\*\* =  $p < .001$ , \*\* =  $p < .01$ , \* =  $p < .05$ , <sup>†</sup> =  $p < .10$

Table 18

*Prediction of prosocial behavior in dictator game (24h only)*

| Criterion | Predictor               | b     | SE   | z     | p                 | $CI_{lower}^{95\%}$ | $CI_{upper}^{95\%}$ | $\beta$ |
|-----------|-------------------------|-------|------|-------|-------------------|---------------------|---------------------|---------|
| Dictator  | ← Psychedelics (24h)    | 0.19  | 0.26 | 0.74  | .459              | -0.32               | 0.70                | 0.03    |
| Dictator  | ← Nicotine (24h)        | -0.17 | 0.22 | -0.77 | .444              | -0.60               | 0.26                | -0.03   |
| Dictator  | ← Alcohol (24h)         | 0.19  | 0.21 | 0.89  | .375              | -0.23               | 0.61                | 0.03    |
| Dictator  | ← Stimulants (24h)      | -0.19 | 0.31 | -0.62 | .536              | -0.79               | 0.41                | -0.02   |
| Dictator  | ← Euphorics (24h)       | 0.15  | 0.29 | 0.52  | .603              | -0.42               | 0.72                | 0.02    |
| Dictator  | ← Cannabinoids (24h)    | -0.22 | 0.21 | -1.04 | .300              | -0.64               | 0.20                | -0.04   |
| Dictator  | ← Benzodiazepines (24h) | -0.26 | 0.67 | -0.39 | .696              | -1.57               | 1.05                | -0.01   |
| Dictator  | ← Inhalants (24h)       | -0.80 | 0.52 | -1.54 | .123              | -1.81               | 0.22                | -0.05   |
| Dictator  | ← Narcotics (24h)       | -0.24 | 0.89 | -0.27 | .785              | -1.98               | 1.50                | -0.01   |
| Dictator  | ← Others (24h)          | 0.53  | 0.49 | 1.09  | .276              | -0.42               | 1.48                | 0.03    |
| Dictator  | ← Gender_1              | -1.21 | 0.77 | -1.58 | .115              | -2.71               | 0.29                | -0.20   |
| Dictator  | ← Gender_2              | -1.66 | 0.77 | -2.17 | .030*             | -3.16               | -0.16               | -0.28   |
| Dictator  | ← Education_1           | -0.13 | 0.45 | -0.30 | .764              | -1.02               | 0.75                | -0.01   |
| Dictator  | ← Education_2           | 0.10  | 0.31 | 0.34  | .735              | -0.50               | 0.71                | 0.01    |
| Dictator  | ← Education_3           | -0.12 | 0.33 | -0.35 | .725              | -0.77               | 0.53                | -0.01   |
| Dictator  | ← Education_4           | 0.21  | 0.28 | 0.77  | .442              | -0.33               | 0.75                | 0.03    |
| Dictator  | ← Age                   | 0.02  | 0.01 | 2.24  | .025*             | 0.00                | 0.04                | 0.08    |
| Dictator  | ← Religion              | -0.03 | 0.06 | -0.51 | .607              | -0.14               | 0.08                | -0.02   |
| Dictator  | ← Conservatism          | -0.16 | 0.08 | -1.93 | .054 <sup>†</sup> | -0.31               | 0.00                | -0.06   |

*Note.* Enter notes. \*\*\* =  $p < .001$ , \*\* =  $p < .01$ , \* =  $p < .05$ , <sup>†</sup> =  $p < .10$

Table 19

*Prediction of prosocial behavior in trust game (24h only)*

| Criterion |   | Predictor             | b     | SE   | z     | p                 | $CI_{lower}^{95\%}$ | $CI_{upper}^{95\%}$ | $\beta$ |
|-----------|---|-----------------------|-------|------|-------|-------------------|---------------------|---------------------|---------|
| Trust     | ← | Psychedelics (24h)    | 0.03  | 0.28 | 0.12  | .903              | -0.52               | 0.59                | 0.01    |
| Trust     | ← | Nicotine (24h)        | -0.05 | 0.20 | -0.23 | .817              | -0.43               | 0.34                | -0.02   |
| Trust     | ← | Alcohol (24h)         | -0.01 | 0.18 | -0.07 | .945              | -0.37               | 0.35                | -0.01   |
| Trust     | ← | Stimulants (24h)      | -0.19 | 0.30 | -0.63 | .528              | -0.78               | 0.40                | -0.05   |
| Trust     | ← | Euphorics (24h)       | -0.10 | 0.34 | -0.29 | .769              | -0.77               | 0.57                | -0.02   |
| Trust     | ← | Cannabinoids (24h)    | -0.16 | 0.20 | -0.81 | .418              | -0.56               | 0.23                | -0.07   |
| Trust     | ← | Benzodiazepines (24h) | 0.71  | 1.30 | 0.54  | .586              | -1.84               | 3.25                | 0.05    |
| Trust     | ← | Inhalants (24h)       | 1.18  | 0.62 | 1.90  | .057 <sup>†</sup> | -0.04               | 2.40                | 0.15    |
| Trust     | ← | Others (24h)          | 0.84  | 0.72 | 1.17  | .242              | -0.57               | 2.25                | 0.10    |
| Trust     | ← | Gender_1              | -0.37 | 0.49 | -0.76 | .448              | -1.33               | 0.59                | -0.18   |
| Trust     | ← | Gender_2              | -0.76 | 0.49 | -1.54 | .123              | -1.73               | 0.21                | -0.36   |
| Trust     | ← | Education_1           | 0.07  | 0.34 | 0.20  | .840              | -0.60               | 0.74                | 0.02    |
| Trust     | ← | Education_2           | -0.03 | 0.27 | -0.10 | .918              | -0.56               | 0.51                | -0.01   |
| Trust     | ← | Education_3           | -0.47 | 0.33 | -1.45 | .148              | -1.11               | 0.17                | -0.12   |
| Trust     | ← | Education_4           | 0.31  | 0.19 | 1.64  | .102              | -0.06               | 0.68                | 0.14    |
| Trust     | ← | Age                   | 0.00  | 0.01 | 0.63  | .531              | -0.01               | 0.02                | 0.05    |
| Trust     | ← | Religion              | 0.07  | 0.05 | 1.35  | .177              | -0.03               | 0.18                | 0.10    |
| Trust     | ← | Conservatism          | -0.09 | 0.07 | -1.31 | .189              | -0.23               | 0.05                | -0.10   |

*Note.* Enter notes. \*\*\* =  $p < .001$ , \*\* =  $p < .01$ , \* =  $p < .05$ , † =  $p < .10$

Table 20

*Prediction of prosocial behavior on give-to-a-stranger item (24h only)*

| Criterion       | Predictor               | b     | SE   | z     | p                 | $CI_{lower}^{95\%}$ | $CI_{upper}^{95\%}$ | $\beta$ |
|-----------------|-------------------------|-------|------|-------|-------------------|---------------------|---------------------|---------|
| Give-A-Stranger | ← Psychedelics (24h)    | 0.06  | 0.09 | 0.68  | .495              | -0.11               | 0.23                | 0.02    |
| Give-A-Stranger | ← Nicotine (24h)        | -0.01 | 0.07 | -0.13 | .894              | -0.15               | 0.13                | 0.00    |
| Give-A-Stranger | ← Alcohol (24h)         | -0.01 | 0.07 | -0.18 | .854              | -0.15               | 0.13                | -0.01   |
| Give-A-Stranger | ← Stimulants (24h)      | -0.14 | 0.10 | -1.43 | .153              | -0.33               | 0.05                | -0.05   |
| Give-A-Stranger | ← Euphorics (24h)       | 0.05  | 0.10 | 0.55  | .582              | -0.14               | 0.24                | 0.02    |
| Give-A-Stranger | ← Cannabinoids (24h)    | 0.04  | 0.07 | 0.60  | .549              | -0.10               | 0.18                | 0.02    |
| Give-A-Stranger | ← Benzodiazepines (24h) | -0.31 | 0.22 | -1.37 | .170              | -0.75               | 0.13                | -0.05   |
| Give-A-Stranger | ← Inhalants (24h)       | -0.06 | 0.18 | -0.34 | .737              | -0.42               | 0.30                | -0.01   |
| Give-A-Stranger | ← Narcotics (24h)       | 0.47  | 0.33 | 1.44  | .149              | -0.17               | 1.11                | 0.06    |
| Give-A-Stranger | ← Others (24h)          | 0.02  | 0.16 | 0.13  | .897              | -0.30               | 0.34                | 0.00    |
| Give-A-Stranger | ← Gender_1              | -0.03 | 0.23 | -0.11 | .911              | -0.47               | 0.42                | -0.01   |
| Give-A-Stranger | ← Gender_2              | -0.06 | 0.23 | -0.28 | .777              | -0.51               | 0.38                | -0.03   |
| Give-A-Stranger | ← Education_1           | 0.02  | 0.15 | 0.13  | .897              | -0.27               | 0.30                | 0.00    |
| Give-A-Stranger | ← Education_2           | 0.06  | 0.10 | 0.54  | .587              | -0.14               | 0.25                | 0.02    |
| Give-A-Stranger | ← Education_3           | -0.15 | 0.11 | -1.41 | .159              | -0.36               | 0.06                | -0.05   |
| Give-A-Stranger | ← Education_4           | 0.04  | 0.09 | 0.50  | .619              | -0.13               | 0.22                | 0.02    |
| Give-A-Stranger | ← Age                   | 0.01  | 0.00 | 4.08  | <.001***          | 0.01                | 0.02                | 0.14    |
| Give-A-Stranger | ← Religion              | 0.02  | 0.02 | 1.03  | .302              | -0.02               | 0.06                | 0.03    |
| Give-A-Stranger | ← Conservatism          | -0.05 | 0.03 | -1.70 | .090 <sup>†</sup> | -0.10               | 0.01                | -0.05   |

*Note.* Enter notes. \*\*\* =  $p < .001$ , \*\* =  $p < .01$ , \* =  $p < .05$ , <sup>†</sup> =  $p < .10$

Table 21

*Prediction of sociocentric perspective in E-Task (24h only)*

| Criterion |   | Predictor             | b     | SE   | z     | p                 | $CI_{lower}^{95\%}$ | $CI_{upper}^{95\%}$ | $\beta$ |
|-----------|---|-----------------------|-------|------|-------|-------------------|---------------------|---------------------|---------|
| PT        | ← | Psychedelics (24h)    | 0.05  | 0.03 | 1.49  | .137              | -0.01               | 0.11                | 0.05    |
| PT        | ← | Nicotine (24h)        | -0.05 | 0.03 | -1.99 | .047*             | -0.10               | 0.00                | -0.06   |
| PT        | ← | Alcohol (24h)         | -0.01 | 0.03 | -0.58 | .561              | -0.06               | 0.03                | -0.02   |
| PT        | ← | Stimulants (24h)      | 0.02  | 0.04 | 0.47  | .636              | -0.05               | 0.09                | 0.02    |
| PT        | ← | Euphorics (24h)       | 0.03  | 0.03 | 0.89  | .376              | -0.04               | 0.10                | 0.03    |
| PT        | ← | Cannabinoids (24h)    | 0.01  | 0.03 | 0.36  | .721              | -0.04               | 0.06                | 0.01    |
| PT        | ← | Benzodiazepines (24h) | 0.15  | 0.08 | 1.83  | .067 <sup>†</sup> | -0.01               | 0.31                | 0.06    |
| PT        | ← | Inhalants (24h)       | -0.20 | 0.06 | -3.19 | .001**            | -0.32               | -0.08               | -0.10   |
| PT        | ← | Narcotics (24h)       | -0.07 | 0.11 | -0.64 | .519              | -0.29               | 0.15                | -0.02   |
| PT        | ← | Others (24h)          | -0.02 | 0.06 | -0.34 | .731              | -0.14               | 0.10                | -0.01   |
| PT        | ← | Gender_1              | -0.06 | 0.08 | -0.73 | .467              | -0.22               | 0.10                | -0.08   |
| PT        | ← | Gender_2              | -0.08 | 0.08 | -0.98 | .326              | -0.24               | 0.08                | -0.11   |
| PT        | ← | Education_1           | 0.00  | 0.05 | -0.09 | .924              | -0.11               | 0.10                | 0.00    |
| PT        | ← | Education_2           | -0.01 | 0.04 | -0.15 | .879              | -0.08               | 0.06                | -0.01   |
| PT        | ← | Education_3           | 0.02  | 0.04 | 0.53  | .595              | -0.06               | 0.10                | 0.02    |
| PT        | ← | Education_4           | 0.05  | 0.03 | 1.75  | .080 <sup>†</sup> | -0.01               | 0.12                | 0.07    |
| PT        | ← | Age                   | 0.00  | 0.00 | -0.15 | .884              | 0.00                | 0.00                | 0.00    |
| PT        | ← | Religion              | 0.00  | 0.01 | -0.13 | .898              | -0.01               | 0.01                | 0.00    |
| PT        | ← | Conservatism          | -0.01 | 0.01 | -0.60 | .546              | -0.02               | 0.01                | -0.02   |

Note. Enter notes. \*\*\* =  $p < .001$ , \*\* =  $p < .01$ , \* =  $p < .05$ , <sup>†</sup> =  $p < .10$

Table 22

*Prediction of both action and outcome valuation in judgments of moral praiseworthiness (24h only)*

| Criterion    |   | Predictor             | b     | SE   | z     | p      | $CI_{lower}^{95\%}$ | $CI_{upper}^{95\%}$ | $\beta$ |
|--------------|---|-----------------------|-------|------|-------|--------|---------------------|---------------------|---------|
| Outcome Val. | ← | Psychedelics (24h)    | 0.00  | 0.05 | -0.01 | .992   | -0.10               | 0.09                | 0.00    |
| Outcome Val. | ← | Nicotine (24h)        | 0.02  | 0.04 | 0.48  | .634   | -0.06               | 0.10                | 0.02    |
| Outcome Val. | ← | Alcohol (24h)         | 0.10  | 0.04 | 2.41  | .016*  | 0.02                | 0.18                | 0.08    |
| Outcome Val. | ← | Stimulants (24h)      | -0.14 | 0.06 | -2.52 | .012*  | -0.25               | -0.03               | -0.08   |
| Outcome Val. | ← | Euphorics (24h)       | -0.02 | 0.05 | -0.33 | .739   | -0.13               | 0.09                | -0.01   |
| Outcome Val. | ← | Cannabinoids (24h)    | -0.12 | 0.04 | -3.07 | .002** | -0.20               | -0.04               | -0.10   |
| Outcome Val. | ← | Benzodiazepines (24h) | 0.08  | 0.13 | 0.65  | .514   | -0.17               | 0.34                | 0.02    |
| Outcome Val. | ← | Inhalants (24h)       | 0.14  | 0.10 | 1.35  | .176   | -0.06               | 0.34                | 0.05    |
| Outcome Val. | ← | Narcotics (24h)       | -0.10 | 0.18 | -0.55 | .580   | -0.46               | 0.26                | -0.02   |
| Outcome Val. | ← | Others (24h)          | 0.15  | 0.09 | 1.65  | .099†  | -0.03               | 0.34                | 0.05    |
| Outcome Val. | ← | Gender_1              | 0.13  | 0.13 | 1.05  | .294   | -0.12               | 0.38                | 0.11    |
| Outcome Val. | ← | Gender_2              | 0.03  | 0.13 | 0.23  | .816   | -0.22               | 0.28                | 0.03    |
| Outcome Val. | ← | Education_1           | -0.08 | 0.08 | -1.02 | .309   | -0.24               | 0.08                | -0.03   |
| Outcome Val. | ← | Education_2           | -0.11 | 0.06 | -1.84 | .066†  | -0.22               | 0.01                | -0.08   |
| Outcome Val. | ← | Education_3           | 0.07  | 0.06 | 1.19  | .234   | -0.05               | 0.19                | 0.04    |
| Outcome Val. | ← | Education_4           | 0.01  | 0.05 | 0.16  | .869   | -0.09               | 0.11                | 0.01    |
| Outcome Val. | ← | Age                   | 0.00  | 0.00 | 2.40  | .016*  | 0.00                | 0.01                | 0.08    |
| Outcome Val. | ← | Religion              | -0.03 | 0.01 | -2.71 | .007** | -0.05               | -0.01               | -0.08   |
| Outcome Val. | ← | Conservatism          | 0.02  | 0.02 | 1.53  | .127   | -0.01               | 0.05                | 0.05    |
| Action Val.  | ← | Psychedelics (24h)    | -0.02 | 0.04 | -0.51 | .612   | -0.11               | 0.06                | -0.02   |
| Action Val.  | ← | Nicotine (24h)        | 0.00  | 0.04 | -0.13 | .897   | -0.08               | 0.07                | 0.00    |
| Action Val.  | ← | Alcohol (24h)         | -0.04 | 0.04 | -1.19 | .233   | -0.12               | 0.03                | -0.04   |
| Action Val.  | ← | Stimulants (24h)      | 0.08  | 0.05 | 1.55  | .122   | -0.02               | 0.18                | 0.05    |

|             |   |                       |       |      |       |        |       |       |       |
|-------------|---|-----------------------|-------|------|-------|--------|-------|-------|-------|
| Action Val. | ← | Euphorics (24h)       | 0.01  | 0.05 | 0.28  | .780   | -0.08 | 0.11  | 0.01  |
| Action Val. | ← | Cannabinoids (24h)    | 0.11  | 0.04 | 3.07  | .002** | 0.04  | 0.19  | 0.11  |
| Action Val. | ← | Benzodiazepines (24h) | -0.16 | 0.12 | -1.35 | .178   | -0.39 | 0.07  | -0.05 |
| Action Val. | ← | Inhalants (24h)       | -0.13 | 0.09 | -1.39 | .165   | -0.31 | 0.05  | -0.05 |
| Action Val. | ← | Narcotics (24h)       | 0.24  | 0.17 | 1.45  | .148   | -0.09 | 0.58  | 0.06  |
| Action Val. | ← | Others (24h)          | -0.21 | 0.09 | -2.48 | .013*  | -0.38 | -0.04 | -0.08 |
| Action Val. | ← | Gender_1              | -0.02 | 0.12 | -0.14 | .891   | -0.25 | 0.21  | -0.02 |
| Action Val. | ← | Gender_2              | -0.05 | 0.12 | -0.47 | .642   | -0.28 | 0.17  | -0.05 |
| Action Val. | ← | Education_1           | 0.01  | 0.07 | 0.20  | .842   | -0.13 | 0.16  | 0.01  |
| Action Val. | ← | Education_2           | 0.07  | 0.05 | 1.28  | .201   | -0.04 | 0.17  | 0.05  |
| Action Val. | ← | Education_3           | 0.00  | 0.06 | -0.01 | .989   | -0.11 | 0.11  | 0.00  |
| Action Val. | ← | Education_4           | -0.02 | 0.05 | -0.50 | .619   | -0.12 | 0.07  | -0.02 |
| Action Val. | ← | Age                   | 0.00  | 0.00 | -0.21 | .837   | 0.00  | 0.00  | -0.01 |
| Action Val. | ← | Religion              | 0.02  | 0.01 | 1.63  | .104   | 0.00  | 0.04  | 0.05  |
| Action Val. | ← | Conservatism          | 0.03  | 0.01 | 2.14  | .032*  | 0.00  | 0.06  | 0.07  |

*Note.* Enter notes. \*\*\* =  $p < .001$ , \*\* =  $p < .01$ , \* =  $p < .05$ , † =  $p < .10$

**Mediation analyses (24h use only)**

The following tables show results of the mediation analyses reported in the SOM I, only including very recent use (i.e., use in the last 24 hours) of substances from each substance class.

Table 23

*Prediction of social fusion via social connectedness (24h only)*

| Criterion     |   | Predictor             | b     | SE   | z     | p                    | $CI_{lower}^{95\%}$ | $CI_{upper}^{95\%}$ | $\beta$ |
|---------------|---|-----------------------|-------|------|-------|----------------------|---------------------|---------------------|---------|
| Social Con.   | ← | Psychedelics (24h)    | 0.24  | 0.14 | 1.75  | .080 <sup>†</sup>    | -0.03               | 0.51                | 0.07    |
| Social Con.   | ← | Nicotine (24h)        | 0.16  | 0.12 | 1.30  | .193                 | -0.08               | 0.40                | 0.05    |
| Social Con.   | ← | Alcohol (24h)         | -0.05 | 0.12 | -0.42 | .676                 | -0.28               | 0.18                | -0.01   |
| Social Con.   | ← | Stimulants (24h)      | 0.00  | 0.16 | 0.03  | .979                 | -0.31               | 0.32                | 0.00    |
| Social Con.   | ← | Euphorics (24h)       | 0.03  | 0.16 | 0.20  | .845                 | -0.27               | 0.33                | 0.01    |
| Social Con.   | ← | Cannabinoids (24h)    | 0.07  | 0.12 | 0.59  | .556                 | -0.16               | 0.30                | 0.02    |
| Social Con.   | ← | Benzodiazepines (24h) | -0.11 | 0.37 | -0.31 | .757                 | -0.84               | 0.61                | -0.01   |
| Social Con.   | ← | Inhalants (24h)       | 0.33  | 0.29 | 1.13  | .260                 | -0.24               | 0.89                | 0.04    |
| Social Con.   | ← | Narcotics (24h)       | 0.12  | 0.56 | 0.21  | .830                 | -0.98               | 1.22                | 0.01    |
| Social Con.   | ← | Others (24h)          | 0.02  | 0.27 | 0.08  | .938                 | -0.51               | 0.55                | 0.00    |
| Social Con.   | ← | Gender_1              | -0.06 | 0.38 | -0.16 | .877                 | -0.80               | 0.69                | -0.02   |
| Social Con.   | ← | Gender_2              | 0.09  | 0.38 | 0.23  | .815                 | -0.65               | 0.83                | 0.03    |
| Social Con.   | ← | Education_1           | -0.20 | 0.24 | -0.85 | .396                 | -0.67               | 0.26                | -0.03   |
| Social Con.   | ← | Education_2           | -0.22 | 0.17 | -1.29 | .198                 | -0.55               | 0.11                | -0.06   |
| Social Con.   | ← | Education_3           | -0.12 | 0.20 | -0.60 | .547                 | -0.52               | 0.28                | -0.02   |
| Social Con.   | ← | Education_4           | -0.25 | 0.15 | -1.67 | .094 <sup>†</sup>    | -0.54               | 0.04                | -0.08   |
| Social Con.   | ← | Age                   | 0.00  | 0.01 | -0.21 | .834                 | -0.01               | 0.01                | -0.01   |
| Social Con.   | ← | Religion              | 0.10  | 0.03 | 3.17  | .002 <sup>**</sup>   | 0.04                | 0.17                | 0.11    |
| Social Con.   | ← | Conservatism          | 0.00  | 0.05 | 0.06  | .953                 | -0.09               | 0.09                | 0.00    |
| Social Fusion | ← | Social Con.           | 0.24  | 0.02 | 11.06 | <.001 <sup>***</sup> | 0.19                | 0.28                | 0.34    |
| Social Fusion | ← | Psychedelics (24h)    | 0.13  | 0.09 | 1.51  | .130                 | -0.04               | 0.30                | 0.05    |
| Social Fusion | ← | Nicotine (24h)        | 0.04  | 0.08 | 0.55  | .584                 | -0.11               | 0.20                | 0.02    |
| Social Fusion | ← | Alcohol (24h)         | 0.03  | 0.08 | 0.42  | .678                 | -0.12               | 0.18                | 0.01    |

|               |    |                       |       |      |       |                   |       |      |       |
|---------------|----|-----------------------|-------|------|-------|-------------------|-------|------|-------|
| Social Fusion | ←  | Stimulants (24h)      | 0.22  | 0.10 | 2.17  | .030*             | 0.02  | 0.42 | 0.08  |
| Social Fusion | ←  | Euphorics (24h)       | 0.01  | 0.10 | 0.08  | .932              | -0.19 | 0.20 | 0.00  |
| Social Fusion | ←  | Cannabinoids (24h)    | 0.06  | 0.08 | 0.80  | .422              | -0.09 | 0.21 | 0.03  |
| Social Fusion | ←  | Benzodiazepines (24h) | 0.16  | 0.24 | 0.67  | .502              | -0.31 | 0.62 | 0.03  |
| Social Fusion | ←  | Inhalants (24h)       | 0.10  | 0.19 | 0.54  | .591              | -0.26 | 0.46 | 0.02  |
| Social Fusion | ←  | Narcotics (24h)       | -0.46 | 0.36 | -1.28 | .202              | -1.17 | 0.25 | -0.05 |
| Social Fusion | ←  | Others (24h)          | -0.33 | 0.17 | -1.89 | .059 <sup>†</sup> | -0.66 | 0.01 | -0.06 |
| Social Fusion | ←  | Gender_1              | -0.12 | 0.23 | -0.51 | .609              | -0.58 | 0.34 | -0.05 |
| Social Fusion | ←  | Gender_2              | -0.24 | 0.23 | -1.02 | .307              | -0.70 | 0.22 | -0.11 |
| Social Fusion | ←  | Education_1           | 0.24  | 0.15 | 1.60  | .109              | -0.05 | 0.54 | 0.06  |
| Social Fusion | ←  | Education_2           | 0.38  | 0.11 | 3.46  | <.001***          | 0.16  | 0.59 | 0.15  |
| Social Fusion | ←  | Education_3           | 0.25  | 0.13 | 1.88  | .060 <sup>†</sup> | -0.01 | 0.50 | 0.07  |
| Social Fusion | ←  | Education_4           | 0.25  | 0.09 | 2.63  | .009**            | 0.06  | 0.43 | 0.11  |
| Social Fusion | ←  | Age                   | 0.00  | 0.00 | -0.97 | .331              | -0.01 | 0.00 | -0.03 |
| Social Fusion | ←  | Religion              | 0.03  | 0.02 | 1.35  | .177              | -0.01 | 0.07 | 0.04  |
| Social Fusion | ←  | Conservatism          | -0.03 | 0.03 | -1.06 | .291              | -0.09 | 0.03 | -0.03 |
| Indirect      | on | SF                    | 0.06  | 0.03 | 1.73  | .084 <sup>†</sup> | -0.01 | 0.12 | 0.02  |
| Direct        | on | SF                    | 0.13  | 0.09 | 1.51  | .130              | -0.04 | 0.30 | 0.05  |
| Total         | on | SF                    | 0.19  | 0.09 | 2.03  | .042*             | 0.01  | 0.37 | 0.07  |

*Note.* Indirect, direct, and total effects represent effects of psychedelic substance use on social fusion via social connectedness (24h only) \*\*\* =  $p < .001$ , \*\* =  $p < .01$ , \* =  $p < .05$ , <sup>†</sup> =  $p < .10$

Table 24

*Prediction of socio-centric perspective taking via social connectedness (24h only)*

| Criterion   | Predictor               | b     | SE   | z     | p                 | $CI_{lower}^{95\%}$ | $CI_{upper}^{95\%}$ | $\beta$ |
|-------------|-------------------------|-------|------|-------|-------------------|---------------------|---------------------|---------|
| Social Con. | ← Psychedelics (24h)    | 0.33  | 0.13 | 2.54  | .011*             | 0.07                | 0.58                | 0.08    |
| Social Con. | ← Nicotine (24h)        | 0.18  | 0.11 | 1.65  | .099 <sup>†</sup> | -0.03               | 0.38                | 0.05    |
| Social Con. | ← Alcohol (24h)         | -0.04 | 0.10 | -0.35 | .729              | -0.24               | 0.17                | -0.01   |
| Social Con. | ← Stimulants (24h)      | 0.06  | 0.15 | 0.39  | .695              | -0.24               | 0.35                | 0.01    |
| Social Con. | ← Euphorics (24h)       | 0.03  | 0.14 | 0.19  | .846              | -0.26               | 0.31                | 0.01    |
| Social Con. | ← Cannabinoids (24h)    | 0.07  | 0.10 | 0.65  | .516              | -0.14               | 0.27                | 0.02    |
| Social Con. | ← Benzodiazepines (24h) | -0.21 | 0.34 | -0.62 | .535              | -0.89               | 0.46                | -0.02   |
| Social Con. | ← Inhalants (24h)       | 0.31  | 0.26 | 1.21  | .225              | -0.19               | 0.82                | 0.04    |
| Social Con. | ← Narcotics (24h)       | 0.06  | 0.46 | 0.13  | .894              | -0.84               | 0.96                | 0.00    |
| Social Con. | ← Others (24h)          | -0.03 | 0.25 | -0.13 | .897              | -0.51               | 0.45                | 0.00    |
| Social Con. | ← Gender_1              | -0.36 | 0.36 | -1.01 | .311              | -1.06               | 0.34                | -0.12   |
| Social Con. | ← Gender_2              | -0.08 | 0.36 | -0.23 | .814              | -0.79               | 0.62                | -0.03   |
| Social Con. | ← Education_1           | -0.10 | 0.21 | -0.47 | .636              | -0.52               | 0.32                | -0.02   |
| Social Con. | ← Education_2           | -0.11 | 0.15 | -0.74 | .456              | -0.40               | 0.18                | -0.03   |
| Social Con. | ← Education_3           | -0.01 | 0.16 | -0.07 | .942              | -0.32               | 0.30                | 0.00    |
| Social Con. | ← Education_4           | -0.18 | 0.13 | -1.41 | .159              | -0.43               | 0.07                | -0.06   |
| Social Con. | ← Age                   | 0.01  | 0.00 | 2.04  | .042*             | 0.00                | 0.02                | 0.07    |
| Social Con. | ← Religion              | 0.09  | 0.03 | 3.03  | .002**            | 0.03                | 0.14                | 0.09    |
| Social Con. | ← Conservatism          | 0.02  | 0.04 | 0.61  | .542              | -0.05               | 0.10                | 0.02    |
| PT          | ← Social Con.           | 0.01  | 0.01 | 0.76  | .447              | -0.01               | 0.02                | 0.02    |
| PT          | ← Psychedelics (24h)    | 0.04  | 0.03 | 1.43  | .154              | -0.02               | 0.11                | 0.05    |
| PT          | ← Nicotine (24h)        | -0.05 | 0.03 | -2.02 | .043*             | -0.10               | 0.00                | -0.06   |
| PT          | ← Alcohol (24h)         | -0.01 | 0.03 | -0.57 | .566              | -0.06               | 0.03                | -0.02   |

|          |    |                       |       |      |       |                    |       |       |       |
|----------|----|-----------------------|-------|------|-------|--------------------|-------|-------|-------|
| PT       | ←  | Stimulants (24h)      | 0.02  | 0.04 | 0.46  | .645               | -0.05 | 0.09  | 0.02  |
| PT       | ←  | Euphorics (24h)       | 0.03  | 0.03 | 0.88  | .378               | -0.04 | 0.10  | 0.03  |
| PT       | ←  | Cannabinoids (24h)    | 0.01  | 0.03 | 0.35  | .728               | -0.04 | 0.06  | 0.01  |
| PT       | ←  | Benzodiazepines (24h) | 0.15  | 0.08 | 1.84  | .065 <sup>†</sup>  | -0.01 | 0.31  | 0.06  |
| PT       | ←  | Inhalants (24h)       | -0.20 | 0.06 | -3.21 | .001 <sup>**</sup> | -0.32 | -0.08 | -0.10 |
| PT       | ←  | Narcotics (24h)       | -0.07 | 0.11 | -0.65 | .517               | -0.29 | 0.15  | -0.02 |
| PT       | ←  | Others (24h)          | -0.02 | 0.06 | -0.34 | .734               | -0.14 | 0.10  | -0.01 |
| PT       | ←  | Gender_1              | -0.06 | 0.08 | -0.70 | .483               | -0.22 | 0.10  | -0.08 |
| PT       | ←  | Gender_2              | -0.08 | 0.08 | -0.97 | .330               | -0.24 | 0.08  | -0.11 |
| PT       | ←  | Education_1           | 0.00  | 0.05 | -0.09 | .930               | -0.11 | 0.10  | 0.00  |
| PT       | ←  | Education_2           | 0.00  | 0.04 | -0.14 | .891               | -0.07 | 0.07  | -0.01 |
| PT       | ←  | Education_3           | 0.02  | 0.04 | 0.53  | .598               | -0.06 | 0.10  | 0.02  |
| PT       | ←  | Education_4           | 0.06  | 0.03 | 1.78  | .075 <sup>†</sup>  | -0.01 | 0.12  | 0.07  |
| PT       | ←  | Age                   | 0.00  | 0.00 | -0.19 | .852               | 0.00  | 0.00  | -0.01 |
| PT       | ←  | Religion              | 0.00  | 0.01 | -0.20 | .838               | -0.01 | 0.01  | -0.01 |
| PT       | ←  | Conservatism          | -0.01 | 0.01 | -0.61 | .540               | -0.02 | 0.01  | -0.02 |
| Indirect | on | PT                    | 0.00  | 0.00 | 0.73  | .466               | 0.00  | 0.01  | 0.00  |
| Direct   | on | PT                    | 0.04  | 0.03 | 1.43  | .154               | -0.02 | 0.11  | 0.05  |
| Total    | on | PT                    | 0.05  | 0.03 | 1.49  | .137               | -0.01 | 0.11  | 0.05  |

*Note.* Indirect, direct, and total effects represent effects of psychedelic substance use on socio-centric perspective taking via social connectedness (24h only) \*\*\* =  $p < .001$ , \*\* =  $p < .01$ , \* =  $p < .05$ , <sup>†</sup> =  $p < .10$

**SEM including social fusion**

The following tables show results of the SEM reported in the SOM I, including social fusion as a second outcome variable.

Table 25

*Full structural equation model (including social fusion)*

| Criterion |   | Predictor              | b     | SE   | z     | p      | $CI_{lower}^{95\%}$ | $CI_{upper}^{95\%}$ | $\beta$ |
|-----------|---|------------------------|-------|------|-------|--------|---------------------|---------------------|---------|
| TE_Expect | ← | Psychedelics (week)    | 0.04  | 0.23 | 0.18  | .858   | -0.41               | 0.49                | 0.01    |
| TE_Expect | ← | Nicotine (week)        | 0.29  | 0.23 | 1.22  | .221   | -0.17               | 0.74                | 0.04    |
| TE_Expect | ← | Alcohol (week)         | -0.36 | 0.17 | -2.07 | .038*  | -0.69               | -0.02               | -0.07   |
| TE_Expect | ← | Stimulants (week)      | 0.23  | 0.24 | 0.96  | .338   | -0.24               | 0.69                | 0.03    |
| TE_Expect | ← | Euphorics (week)       | 0.27  | 0.22 | 1.23  | .217   | -0.16               | 0.70                | 0.04    |
| TE_Expect | ← | Cannabinoids (week)    | -0.04 | 0.18 | -0.24 | .808   | -0.40               | 0.31                | -0.01   |
| TE_Expect | ← | Benzodiazepines (week) | 0.51  | 0.50 | 1.02  | .307   | -0.47               | 1.50                | 0.04    |
| TE_Expect | ← | Inhalants (week)       | -0.12 | 0.33 | -0.36 | .718   | -0.78               | 0.53                | -0.01   |
| TE_Expect | ← | Narcotics (week)       | -0.04 | 0.57 | -0.06 | .948   | -1.15               | 1.07                | 0.00    |
| TE_Expect | ← | Others (week)          | -0.19 | 0.42 | -0.47 | .640   | -1.01               | 0.62                | -0.01   |
| TE_Expect | ← | Psychedelics (24h)     | 0.36  | 0.16 | 2.24  | .025*  | 0.04                | 0.67                | 0.07    |
| TE_Expect | ← | Nicotine (24h)         | -0.07 | 0.13 | -0.54 | .588   | -0.33               | 0.18                | -0.02   |
| TE_Expect | ← | Alcohol (24h)          | -0.20 | 0.14 | -1.47 | .141   | -0.47               | 0.07                | -0.05   |
| TE_Expect | ← | Stimulants (24h)       | 0.15  | 0.19 | 0.83  | .409   | -0.21               | 0.52                | 0.03    |
| TE_Expect | ← | Euphorics (24h)        | 0.11  | 0.18 | 0.61  | .541   | -0.24               | 0.46                | 0.02    |
| TE_Expect | ← | Cannabinoids (24h)     | 0.42  | 0.13 | 3.26  | .001** | 0.17                | 0.68                | 0.11    |
| TE_Expect | ← | Benzodiazepines (24h)  | -0.10 | 0.41 | -0.24 | .810   | -0.91               | 0.71                | -0.01   |
| TE_Expect | ← | Inhalants (24h)        | -0.05 | 0.32 | -0.15 | .881   | -0.67               | 0.58                | 0.00    |
| TE_Expect | ← | Narcotics (24h)        | 0.56  | 0.56 | 1.00  | .316   | -0.54               | 1.66                | 0.04    |
| TE_Expect | ← | Others (24h)           | -0.26 | 0.30 | -0.87 | .383   | -0.84               | 0.32                | -0.03   |
| TE_Expect | ← | Gender_1               | -0.76 | 0.42 | -1.83 | .068†  | -1.57               | 0.05                | -0.20   |
| TE_Expect | ← | Gender_2               | -0.78 | 0.41 | -1.89 | .059†  | -1.60               | 0.03                | -0.20   |
| TE_Expect | ← | Education_1            | -0.28 | 0.26 | -1.10 | .269   | -0.79               | 0.22                | -0.04   |

|           |   |                        |       |      |       |          |       |       |       |
|-----------|---|------------------------|-------|------|-------|----------|-------|-------|-------|
| TE_Expect | ← | Education_2            | -0.23 | 0.18 | -1.30 | .194     | -0.58 | 0.12  | -0.05 |
| TE_Expect | ← | Education_3            | -0.43 | 0.20 | -2.22 | .026*    | -0.82 | -0.05 | -0.08 |
| TE_Expect | ← | Education_4            | -0.32 | 0.16 | -2.03 | .042*    | -0.63 | -0.01 | -0.08 |
| TE_Expect | ← | Age                    | -0.02 | 0.01 | -3.18 | .001**   | -0.03 | -0.01 | -0.10 |
| TE_Expect | ← | Religion               | 0.13  | 0.03 | 3.83  | <.001*** | 0.06  | 0.20  | 0.11  |
| TE_Expect | ← | Conservatism           | -0.04 | 0.05 | -0.85 | .395     | -0.14 | 0.05  | -0.03 |
| TE_Desire | ← | Psychedelics (week)    | 0.13  | 0.24 | 0.53  | .596     | -0.35 | 0.60  | 0.02  |
| TE_Desire | ← | Nicotine (week)        | 0.35  | 0.25 | 1.40  | .160     | -0.14 | 0.83  | 0.04  |
| TE_Desire | ← | Alcohol (week)         | -0.48 | 0.18 | -2.61 | .009**   | -0.84 | -0.12 | -0.08 |
| TE_Desire | ← | Stimulants (week)      | 0.01  | 0.25 | 0.03  | .974     | -0.49 | 0.50  | 0.00  |
| TE_Desire | ← | Euphorics (week)       | 0.48  | 0.23 | 2.06  | .040*    | 0.02  | 0.94  | 0.07  |
| TE_Desire | ← | Cannabinoids (week)    | 0.02  | 0.19 | 0.10  | .918     | -0.36 | 0.40  | 0.00  |
| TE_Desire | ← | Benzodiazepines (week) | 0.25  | 0.54 | 0.46  | .646     | -0.80 | 1.30  | 0.02  |
| TE_Desire | ← | Inhalants (week)       | 0.20  | 0.36 | 0.55  | .582     | -0.50 | 0.90  | 0.02  |
| TE_Desire | ← | Narcotics (week)       | -0.75 | 0.61 | -1.24 | .215     | -1.94 | 0.44  | -0.04 |
| TE_Desire | ← | Others (week)          | 0.33  | 0.44 | 0.74  | .460     | -0.54 | 1.20  | 0.02  |
| TE_Desire | ← | Psychedelics (24h)     | 0.34  | 0.17 | 1.98  | .047*    | 0.00  | 0.67  | 0.06  |
| TE_Desire | ← | Nicotine (24h)         | -0.12 | 0.14 | -0.88 | .378     | -0.39 | 0.15  | -0.03 |
| TE_Desire | ← | Alcohol (24h)          | -0.45 | 0.14 | -3.09 | .002**   | -0.73 | -0.16 | -0.10 |
| TE_Desire | ← | Stimulants (24h)       | 0.07  | 0.20 | 0.37  | .708     | -0.31 | 0.46  | 0.01  |
| TE_Desire | ← | Euphorics (24h)        | -0.01 | 0.19 | -0.08 | .937     | -0.39 | 0.36  | 0.00  |
| TE_Desire | ← | Cannabinoids (24h)     | 0.62  | 0.14 | 4.49  | <.001*** | 0.35  | 0.89  | 0.15  |
| TE_Desire | ← | Benzodiazepines (24h)  | 0.71  | 0.44 | 1.60  | .109     | -0.16 | 1.57  | 0.05  |
| TE_Desire | ← | Inhalants (24h)        | 0.19  | 0.34 | 0.56  | .574     | -0.48 | 0.86  | 0.02  |
| TE_Desire | ← | Narcotics (24h)        | -0.46 | 0.60 | -0.77 | .443     | -1.63 | 0.71  | -0.03 |
| TE_Desire | ← | Others (24h)           | -0.12 | 0.32 | -0.38 | .706     | -0.74 | 0.50  | -0.01 |
| TE_Desire | ← | Gender_1               | -0.37 | 0.45 | -0.82 | .411     | -1.25 | 0.51  | -0.09 |

|           |   |                        |       |      |       |          |       |       |       |
|-----------|---|------------------------|-------|------|-------|----------|-------|-------|-------|
| TE_Desire | ← | Gender_2               | -0.41 | 0.45 | -0.91 | .362     | -1.29 | 0.47  | -0.10 |
| TE_Desire | ← | Education_1            | -0.31 | 0.28 | -1.12 | .264     | -0.85 | 0.23  | -0.04 |
| TE_Desire | ← | Education_2            | -0.47 | 0.19 | -2.44 | .015*    | -0.84 | -0.09 | -0.09 |
| TE_Desire | ← | Education_3            | -0.54 | 0.21 | -2.55 | .011*    | -0.95 | -0.12 | -0.09 |
| TE_Desire | ← | Education_4            | -0.41 | 0.17 | -2.47 | .013*    | -0.74 | -0.09 | -0.10 |
| TE_Desire | ← | Age                    | -0.03 | 0.01 | -4.65 | <.001*** | -0.04 | -0.02 | -0.15 |
| TE_Desire | ← | Religion               | 0.16  | 0.04 | 4.48  | <.001*** | 0.09  | 0.23  | 0.13  |
| TE_Desire | ← | Conservatism           | -0.12 | 0.05 | -2.39 | .017*    | -0.22 | -0.02 | -0.07 |
| TE        | ← | TE_Expect              | 0.16  | 0.04 | 4.16  | <.001*** | 0.09  | 0.24  | 0.15  |
| TE        | ← | TE_Desire              | 0.23  | 0.04 | 6.46  | <.001*** | 0.16  | 0.30  | 0.23  |
| TE        | ← | Psychedelics (week)    | 0.32  | 0.22 | 1.44  | .149     | -0.11 | 0.76  | 0.04  |
| TE        | ← | Nicotine (week)        | -0.12 | 0.23 | -0.53 | .593     | -0.57 | 0.32  | -0.01 |
| TE        | ← | Alcohol (week)         | -0.20 | 0.17 | -1.21 | .224     | -0.53 | 0.12  | -0.04 |
| TE        | ← | Stimulants (week)      | 0.05  | 0.23 | 0.22  | .829     | -0.40 | 0.50  | 0.01  |
| TE        | ← | Euphorics (week)       | 0.10  | 0.21 | 0.45  | .651     | -0.32 | 0.52  | 0.01  |
| TE        | ← | Cannabinoids (week)    | -0.09 | 0.17 | -0.52 | .606     | -0.43 | 0.25  | -0.01 |
| TE        | ← | Benzodiazepines (week) | -0.05 | 0.49 | -0.10 | .923     | -1.01 | 0.92  | 0.00  |
| TE        | ← | Inhalants (week)       | 0.19  | 0.32 | 0.59  | .554     | -0.44 | 0.83  | 0.02  |
| TE        | ← | Narcotics (week)       | 0.34  | 0.56 | 0.61  | .542     | -0.75 | 1.43  | 0.02  |
| TE        | ← | Others (week)          | 0.09  | 0.41 | 0.21  | .832     | -0.71 | 0.89  | 0.01  |
| TE        | ← | Psychedelics (24h)     | 0.79  | 0.16 | 5.07  | <.001*** | 0.48  | 1.09  | 0.15  |
| TE        | ← | Nicotine (24h)         | 0.29  | 0.13 | 2.28  | .023*    | 0.04  | 0.53  | 0.06  |
| TE        | ← | Alcohol (24h)          | -0.48 | 0.13 | -3.62 | <.001*** | -0.73 | -0.22 | -0.11 |
| TE        | ← | Stimulants (24h)       | 0.27  | 0.18 | 1.54  | .124     | -0.08 | 0.62  | 0.05  |
| TE        | ← | Euphorics (24h)        | 0.33  | 0.17 | 1.89  | .059†    | -0.01 | 0.67  | 0.06  |
| TE        | ← | Cannabinoids (24h)     | 0.11  | 0.13 | 0.87  | .386     | -0.14 | 0.36  | 0.03  |
| TE        | ← | Benzodiazepines (24h)  | -0.29 | 0.41 | -0.71 | .478     | -1.08 | 0.51  | -0.02 |

|             |   |                        |       |      |       |                   |       |       |       |
|-------------|---|------------------------|-------|------|-------|-------------------|-------|-------|-------|
| TE          | ← | Inhalants (24h)        | -0.68 | 0.31 | -2.23 | .026*             | -1.28 | -0.08 | -0.06 |
| TE          | ← | Narcotics (24h)        | -0.18 | 0.54 | -0.32 | .745              | -1.23 | 0.88  | -0.01 |
| TE          | ← | Others (24h)           | 0.38  | 0.29 | 1.31  | .189              | -0.19 | 0.95  | 0.04  |
| TE          | ← | Gender_1               | 0.11  | 0.40 | 0.27  | .790              | -0.68 | 0.89  | 0.03  |
| TE          | ← | Gender_2               | 0.21  | 0.40 | 0.52  | .604              | -0.58 | 0.99  | 0.05  |
| TE          | ← | Education_1            | 0.19  | 0.25 | 0.78  | .436              | -0.30 | 0.68  | 0.02  |
| TE          | ← | Education_2            | 0.45  | 0.17 | 2.58  | .010**            | 0.11  | 0.78  | 0.09  |
| TE          | ← | Education_3            | -0.23 | 0.19 | -1.25 | .212              | -0.60 | 0.13  | -0.04 |
| TE          | ← | Education_4            | 0.17  | 0.15 | 1.13  | .260              | -0.13 | 0.47  | 0.04  |
| TE          | ← | Age                    | 0.01  | 0.01 | 1.92  | .055 <sup>†</sup> | 0.00  | 0.02  | 0.06  |
| TE          | ← | Religion               | 0.09  | 0.03 | 2.83  | .005**            | 0.03  | 0.16  | 0.07  |
| TE          | ← | Conservatism           | -0.06 | 0.05 | -1.31 | .189              | -0.15 | 0.03  | -0.04 |
| Social Con. | ← | TE                     | 0.11  | 0.02 | 4.82  | <.001***          | 0.07  | 0.15  | 0.14  |
| Social Con. | ← | Psychedelics (week)    | 0.28  | 0.19 | 1.49  | .135              | -0.09 | 0.65  | 0.05  |
| Social Con. | ← | Nicotine (week)        | -0.04 | 0.19 | -0.22 | .824              | -0.41 | 0.33  | -0.01 |
| Social Con. | ← | Alcohol (week)         | -0.33 | 0.14 | -2.42 | .016*             | -0.61 | -0.06 | -0.08 |
| Social Con. | ← | Stimulants (week)      | -0.07 | 0.19 | -0.36 | .721              | -0.45 | 0.31  | -0.01 |
| Social Con. | ← | Euphorics (week)       | 0.14  | 0.18 | 0.76  | .445              | -0.22 | 0.49  | 0.03  |
| Social Con. | ← | Cannabinoids (week)    | 0.30  | 0.15 | 2.07  | .039*             | 0.02  | 0.59  | 0.06  |
| Social Con. | ← | Benzodiazepines (week) | -0.08 | 0.41 | -0.19 | .847              | -0.89 | 0.73  | -0.01 |
| Social Con. | ← | Inhalants (week)       | -0.55 | 0.28 | -2.00 | .046*             | -1.09 | -0.01 | -0.06 |
| Social Con. | ← | Narcotics (week)       | 0.47  | 0.47 | 1.00  | .316              | -0.45 | 1.39  | 0.03  |
| Social Con. | ← | Others (week)          | -0.22 | 0.34 | -0.64 | .525              | -0.89 | 0.46  | -0.02 |
| Social Con. | ← | Psychedelics (24h)     | 0.24  | 0.13 | 1.79  | .074 <sup>†</sup> | -0.02 | 0.49  | 0.06  |
| Social Con. | ← | Nicotine (24h)         | 0.12  | 0.11 | 1.13  | .258              | -0.09 | 0.33  | 0.04  |
| Social Con. | ← | Alcohol (24h)          | -0.10 | 0.11 | -0.87 | .385              | -0.31 | 0.12  | -0.03 |
| Social Con. | ← | Stimulants (24h)       | -0.01 | 0.15 | -0.08 | .933              | -0.31 | 0.28  | 0.00  |

|             |   |                        |       |      |       |                   |       |      |       |
|-------------|---|------------------------|-------|------|-------|-------------------|-------|------|-------|
| Social Con. | ← | Euphorics (24h)        | 0.04  | 0.15 | 0.30  | .768              | -0.24 | 0.33 | 0.01  |
| Social Con. | ← | Cannabinoids (24h)     | 0.06  | 0.11 | 0.60  | .551              | -0.14 | 0.27 | 0.02  |
| Social Con. | ← | Benzodiazepines (24h)  | -0.15 | 0.34 | -0.44 | .662              | -0.82 | 0.52 | -0.02 |
| Social Con. | ← | Inhalants (24h)        | 0.42  | 0.26 | 1.65  | .100 <sup>†</sup> | -0.08 | 0.93 | 0.05  |
| Social Con. | ← | Narcotics (24h)        | 0.07  | 0.45 | 0.16  | .876              | -0.82 | 0.96 | 0.01  |
| Social Con. | ← | Others (24h)           | -0.04 | 0.24 | -0.17 | .864              | -0.52 | 0.43 | -0.01 |
| Social Con. | ← | Gender_1               | -0.29 | 0.35 | -0.84 | .403              | -0.98 | 0.39 | -0.09 |
| Social Con. | ← | Gender_2               | -0.02 | 0.35 | -0.05 | .960              | -0.70 | 0.67 | -0.01 |
| Social Con. | ← | Education_1            | -0.08 | 0.21 | -0.37 | .712              | -0.49 | 0.34 | -0.01 |
| Social Con. | ← | Education_2            | -0.10 | 0.14 | -0.66 | .509              | -0.38 | 0.19 | -0.03 |
| Social Con. | ← | Education_3            | 0.08  | 0.16 | 0.54  | .590              | -0.22 | 0.39 | 0.02  |
| Social Con. | ← | Education_4            | -0.14 | 0.13 | -1.08 | .279              | -0.39 | 0.11 | -0.04 |
| Social Con. | ← | Age                    | 0.01  | 0.00 | 2.13  | .033*             | 0.00  | 0.02 | 0.07  |
| Social Con. | ← | Religion               | 0.07  | 0.03 | 2.42  | .016*             | 0.01  | 0.12 | 0.07  |
| Social Con. | ← | Conservatism           | 0.03  | 0.04 | 0.85  | .394              | -0.04 | 0.11 | 0.03  |
| Mood        | ← | TE                     | 0.07  | 0.01 | 6.01  | <.001***          | 0.05  | 0.09 | 0.18  |
| Mood        | ← | Social Con.            | 0.10  | 0.01 | 7.40  | <.001***          | 0.08  | 0.13 | 0.21  |
| Mood        | ← | Psychedelics (week)    | -0.10 | 0.09 | -1.15 | .251              | -0.28 | 0.07 | -0.04 |
| Mood        | ← | Nicotine (week)        | 0.10  | 0.09 | 1.08  | .279              | -0.08 | 0.28 | 0.03  |
| Mood        | ← | Alcohol (week)         | -0.03 | 0.07 | -0.40 | .689              | -0.16 | 0.11 | -0.01 |
| Mood        | ← | Stimulants (week)      | 0.05  | 0.09 | 0.56  | .576              | -0.13 | 0.24 | 0.02  |
| Mood        | ← | Euphorics (week)       | -0.10 | 0.09 | -1.18 | .236              | -0.27 | 0.07 | -0.04 |
| Mood        | ← | Cannabinoids (week)    | 0.01  | 0.07 | 0.13  | .894              | -0.13 | 0.15 | 0.00  |
| Mood        | ← | Benzodiazepines (week) | -0.16 | 0.20 | -0.79 | .430              | -0.55 | 0.24 | -0.03 |
| Mood        | ← | Inhalants (week)       | 0.17  | 0.13 | 1.31  | .192              | -0.09 | 0.43 | 0.04  |
| Mood        | ← | Narcotics (week)       | -0.18 | 0.23 | -0.78 | .438              | -0.62 | 0.27 | -0.03 |
| Mood        | ← | Others (week)          | 0.01  | 0.17 | 0.07  | .944              | -0.32 | 0.34 | 0.00  |

|               |   |                       |       |      |       |                      |       |       |       |
|---------------|---|-----------------------|-------|------|-------|----------------------|-------|-------|-------|
| Mood          | ← | Psychedelics (24h)    | 0.12  | 0.06 | 1.85  | .064 <sup>†</sup>    | -0.01 | 0.25  | 0.06  |
| Mood          | ← | Nicotine (24h)        | 0.02  | 0.05 | 0.35  | .730                 | -0.08 | 0.12  | 0.01  |
| Mood          | ← | Alcohol (24h)         | -0.05 | 0.05 | -1.01 | .312                 | -0.16 | 0.05  | -0.03 |
| Mood          | ← | Stimulants (24h)      | 0.09  | 0.07 | 1.17  | .242                 | -0.06 | 0.23  | 0.04  |
| Mood          | ← | Euphorics (24h)       | -0.01 | 0.07 | -0.19 | .846                 | -0.15 | 0.13  | -0.01 |
| Mood          | ← | Cannabinoids (24h)    | 0.06  | 0.05 | 1.20  | .230                 | -0.04 | 0.16  | 0.04  |
| Mood          | ← | Benzodiazepines (24h) | -0.15 | 0.17 | -0.91 | .360                 | -0.48 | 0.17  | -0.03 |
| Mood          | ← | Inhalants (24h)       | -0.11 | 0.13 | -0.86 | .392                 | -0.35 | 0.14  | -0.03 |
| Mood          | ← | Narcotics (24h)       | -0.01 | 0.22 | -0.05 | .962                 | -0.45 | 0.43  | 0.00  |
| Mood          | ← | Others (24h)          | -0.18 | 0.12 | -1.51 | .131                 | -0.41 | 0.05  | -0.04 |
| Mood          | ← | Gender_1              | 0.15  | 0.17 | 0.89  | .373                 | -0.18 | 0.49  | 0.10  |
| Mood          | ← | Gender_2              | 0.18  | 0.17 | 1.02  | .306                 | -0.16 | 0.51  | 0.11  |
| Mood          | ← | Education_1           | 0.00  | 0.10 | 0.02  | .986                 | -0.20 | 0.20  | 0.00  |
| Mood          | ← | Education_2           | -0.16 | 0.07 | -2.28 | .023 <sup>*</sup>    | -0.30 | -0.02 | -0.09 |
| Mood          | ← | Education_3           | -0.13 | 0.08 | -1.75 | .080 <sup>†</sup>    | -0.28 | 0.02  | -0.06 |
| Mood          | ← | Education_4           | -0.13 | 0.06 | -2.09 | .036 <sup>*</sup>    | -0.25 | -0.01 | -0.08 |
| Mood          | ← | Age                   | 0.00  | 0.00 | 2.32  | .020 <sup>*</sup>    | 0.00  | 0.01  | 0.07  |
| Mood          | ← | Religion              | -0.01 | 0.01 | -0.81 | .419                 | -0.04 | 0.02  | -0.02 |
| Mood          | ← | Conservatism          | -0.01 | 0.02 | -0.54 | .590                 | -0.05 | 0.03  | -0.02 |
| Social Fusion | ← | TE                    | 0.16  | 0.02 | 9.77  | <.001 <sup>***</sup> | 0.13  | 0.20  | 0.31  |
| Social Fusion | ← | Social Con.           | 0.21  | 0.02 | 10.18 | <.001 <sup>***</sup> | 0.17  | 0.25  | 0.30  |
| Social Fusion | ← | Psychedelics (week)   | -0.01 | 0.13 | -0.06 | .950                 | -0.27 | 0.25  | 0.00  |
| Social Fusion | ← | Nicotine (week)       | 0.12  | 0.13 | 0.88  | .381                 | -0.14 | 0.38  | 0.03  |
| Social Fusion | ← | Alcohol (week)        | 0.09  | 0.10 | 0.84  | .401                 | -0.12 | 0.29  | 0.03  |
| Social Fusion | ← | Stimulants (week)     | 0.15  | 0.13 | 1.11  | .267                 | -0.11 | 0.41  | 0.04  |
| Social Fusion | ← | Euphorics (week)      | -0.05 | 0.13 | -0.43 | .667                 | -0.30 | 0.19  | -0.01 |
| Social Fusion | ← | Cannabinoids (week)   | -0.12 | 0.11 | -1.17 | .243                 | -0.33 | 0.08  | -0.04 |

|               |    |                        |       |      |       |                      |       |       |       |
|---------------|----|------------------------|-------|------|-------|----------------------|-------|-------|-------|
| Social Fusion | ←  | Benzodiazepines (week) | -0.05 | 0.30 | -0.16 | .877                 | -0.64 | 0.55  | -0.01 |
| Social Fusion | ←  | Inhalants (week)       | 0.01  | 0.19 | 0.05  | .961                 | -0.37 | 0.39  | 0.00  |
| Social Fusion | ←  | Narcotics (week)       | -0.39 | 0.32 | -1.20 | .230                 | -1.02 | 0.25  | -0.04 |
| Social Fusion | ←  | Others (week)          | -0.16 | 0.23 | -0.70 | .482                 | -0.60 | 0.29  | -0.02 |
| Social Fusion | ←  | Psychedelics (24h)     | 0.02  | 0.09 | 0.28  | .777                 | -0.15 | 0.19  | 0.01  |
| Social Fusion | ←  | Nicotine (24h)         | 0.01  | 0.08 | 0.13  | .894                 | -0.14 | 0.16  | 0.00  |
| Social Fusion | ←  | Alcohol (24h)          | 0.11  | 0.08 | 1.35  | .177                 | -0.05 | 0.27  | 0.05  |
| Social Fusion | ←  | Stimulants (24h)       | 0.18  | 0.10 | 1.79  | .073 <sup>†</sup>    | -0.02 | 0.37  | 0.06  |
| Social Fusion | ←  | Euphorics (24h)        | -0.04 | 0.10 | -0.38 | .707                 | -0.23 | 0.15  | -0.01 |
| Social Fusion | ←  | Cannabinoids (24h)     | 0.04  | 0.08 | 0.47  | .639                 | -0.11 | 0.19  | 0.02  |
| Social Fusion | ←  | Benzodiazepines (24h)  | 0.21  | 0.23 | 0.92  | .358                 | -0.24 | 0.66  | 0.03  |
| Social Fusion | ←  | Inhalants (24h)        | 0.22  | 0.18 | 1.22  | .223                 | -0.13 | 0.57  | 0.04  |
| Social Fusion | ←  | Narcotics (24h)        | -0.62 | 0.34 | -1.79 | .074 <sup>†</sup>    | -1.29 | 0.06  | -0.07 |
| Social Fusion | ←  | Others (24h)           | -0.36 | 0.17 | -2.17 | .030 <sup>*</sup>    | -0.68 | -0.03 | -0.06 |
| Social Fusion | ←  | Gender_1               | -0.09 | 0.22 | -0.41 | .685                 | -0.53 | 0.35  | -0.04 |
| Social Fusion | ←  | Gender_2               | -0.22 | 0.22 | -1.00 | .318                 | -0.66 | 0.21  | -0.10 |
| Social Fusion | ←  | Education_1            | 0.15  | 0.14 | 1.03  | .304                 | -0.13 | 0.43  | 0.03  |
| Social Fusion | ←  | Education_2            | 0.20  | 0.11 | 1.89  | .058 <sup>†</sup>    | -0.01 | 0.41  | 0.08  |
| Social Fusion | ←  | Education_3            | 0.17  | 0.12 | 1.39  | .165                 | -0.07 | 0.42  | 0.05  |
| Social Fusion | ←  | Education_4            | 0.18  | 0.09 | 2.03  | .043 <sup>*</sup>    | 0.01  | 0.36  | 0.08  |
| Social Fusion | ←  | Age                    | -0.01 | 0.00 | -1.48 | .139                 | -0.01 | 0.00  | -0.06 |
| Social Fusion | ←  | Religion               | 0.01  | 0.02 | 0.60  | .547                 | -0.03 | 0.05  | 0.02  |
| Social Fusion | ←  | Conservatism           | -0.02 | 0.03 | -0.63 | .531                 | -0.07 | 0.04  | -0.02 |
| Indirect      | on | Mood via TE            | 0.05  | 0.01 | 3.88  | <.001 <sup>***</sup> | 0.03  | 0.08  | 0.03  |
| Indirect      | on | Mood via Soc.Con.      | 0.02  | 0.01 | 1.74  | .082 <sup>†</sup>    | 0.00  | 0.05  | 0.01  |
| Indirect      | on | Mood via both          | 0.01  | 0.00 | 3.17  | .002 <sup>**</sup>   | 0.00  | 0.01  | 0.00  |
| Indirect      | on | Mood (all)             | 0.09  | 0.02 | 4.22  | <.001 <sup>***</sup> | 0.05  | 0.13  | 0.04  |

|          |    |                 |      |      |      |                      |       |      |      |
|----------|----|-----------------|------|------|------|----------------------|-------|------|------|
| Direct   | on | Mood            | 0.12 | 0.06 | 1.85 | .064 <sup>†</sup>    | -0.01 | 0.25 | 0.06 |
| Total    | on | Mood            | 0.21 | 0.07 | 3.12 | .002 <sup>**</sup>   | 0.08  | 0.33 | 0.10 |
| Indirect | on | SF via TE       | 0.13 | 0.03 | 4.49 | <.001 <sup>***</sup> | 0.07  | 0.18 | 0.05 |
| Indirect | on | SF via Soc.Con. | 0.05 | 0.03 | 1.76 | .078 <sup>†</sup>    | -0.01 | 0.11 | 0.02 |
| Indirect | on | SF via both     | 0.02 | 0.01 | 3.31 | <.001 <sup>***</sup> | 0.01  | 0.03 | 0.01 |
| Indirect | on | SF (all)        | 0.20 | 0.04 | 4.65 | <.001 <sup>***</sup> | 0.11  | 0.28 | 0.07 |
| Direct   | on | SF              | 0.02 | 0.09 | 0.28 | .777                 | -0.15 | 0.19 | 0.01 |
| Total    | on | SF              | 0.22 | 0.09 | 2.35 | .019 <sup>*</sup>    | 0.04  | 0.41 | 0.08 |

---

*Note.* Enter notes. <sup>\*\*\*</sup> =  $p < .001$ , <sup>\*\*</sup> =  $p < .01$ , <sup>\*</sup> =  $p < .05$ , <sup>†</sup> =  $p < .10$

**Table captions**

- Table 1.* Prediction of social fusion
- Table 2.* Prediction of prosocial behavior in dictator game
- Table 3.* Prediction of prosocial behavior in trust game
- Table 4.* Prediction of prosocial behavior on give-to-a-stranger item
- Table 5.* Prediction of sociocentric perspective in E-Task
- Table 6.* Prediction of both action and outcome valuation in judgments of moral praiseworthiness
- Table 7.* Prediction of social fusion via social connectedness
- Table 8.* Prediction of socio-centric perspective taking via social connectedness
- Table 9.* Prediction of social fusion (24h vs. last week)
- Table 10.* Prediction of prosocial behavior in dictator game (24h vs. last week)
- Table 11.* Prediction of prosocial behavior in trust game (24h vs. last week)
- Table 12.* Prediction of prosocial behavior on give-to-a-stranger item (24h vs. last week)
- Table 13.* Prediction of sociocentric perspective in E-Task (24h vs. last week)
- Table 14.* Prediction of both action and outcome valuation in judgments of moral praiseworthiness (24h vs. last week)
- Table 15.* Prediction of social fusion via social connectedness (24h vs. last week)
- Table 16.* Prediction of socio-centric perspective taking via social connectedness (24h vs. last week)
- Table 17.* Prediction of social fusion (24h only)
- Table 18.* Prediction of prosocial behavior in dictator game (24h only)
- Table 19.* Prediction of prosocial behavior in trust game (24h only)
- Table 20.* Prediction of prosocial behavior on give-to-a-stranger item (24h only)
- Table 21.* Prediction of sociocentric perspective in E-Task (24h only)

- Table 22.* Prediction of both action and outcome valuation in judgments of moral praiseworthiness (24h only)
- Table 23.* Prediction of social fusion via social connectedness (24h only)
- Table 24.* Prediction of socio-centric perspective taking via social connectedness (24h only)
- Table 25.* Full structural equation model (including social fusion)

Supplementary Materials IV: Materials

Matthias Forstmann<sup>1,2</sup>, Daniel A. Yudkin<sup>1</sup>, Annayah M. B. Prosser<sup>3</sup>, S. Megan Heller<sup>4</sup>, &  
Molly J. Crockett<sup>1</sup>

<sup>1</sup> University of Cologne, Department of Psychology

<sup>2</sup> Yale University, Department of Psychology

<sup>3</sup> University of Bath, Department of Psychology

<sup>4</sup> University of California, Los Angeles, Department of Anthropology

## Supplementary Materials III: Materials

**Materials used to assess the constructs reported in the main manuscript.***Substance use questionnaire.*

In the table below, for each category of substances, please indicate whether you are currently under the influence of that substance; whether you have taken that substance within the last 24 hours or the last week; and whether you have taken that substance for the first time this week.

|                                                                  | Currently under the influence | Taken in last 24 hours   | Taken at any time this week | Taken for the first time this week |
|------------------------------------------------------------------|-------------------------------|--------------------------|-----------------------------|------------------------------------|
| Alcohol                                                          | <input type="checkbox"/>      | <input type="checkbox"/> | <input type="checkbox"/>    | <input type="checkbox"/>           |
| Nicotine                                                         | <input type="checkbox"/>      | <input type="checkbox"/> | <input type="checkbox"/>    | <input type="checkbox"/>           |
| Cannabis products<br>(e.g., weed, THC, CBD, hemp oil)            | <input type="checkbox"/>      | <input type="checkbox"/> | <input type="checkbox"/>    | <input type="checkbox"/>           |
| Hallucinogens<br>(e.g., psilocybin, LSD, salvia, mescaline, DMT) | <input type="checkbox"/>      | <input type="checkbox"/> | <input type="checkbox"/>    | <input type="checkbox"/>           |
| Euphorics<br>(e.g., MDMA, Molly, Kratom)                         | <input type="checkbox"/>      | <input type="checkbox"/> | <input type="checkbox"/>    | <input type="checkbox"/>           |
| Stimulants<br>(e.g., cocaine, methamphetamine, ephedrine)        | <input type="checkbox"/>      | <input type="checkbox"/> | <input type="checkbox"/>    | <input type="checkbox"/>           |
| Narcotic Analgesics<br>(e.g., morphine, heroin, oxycodone)       | <input type="checkbox"/>      | <input type="checkbox"/> | <input type="checkbox"/>    | <input type="checkbox"/>           |
| Benzodiazepines<br>(e.g., Valium, Alprazolam [Xanax])            | <input type="checkbox"/>      | <input type="checkbox"/> | <input type="checkbox"/>    | <input type="checkbox"/>           |
| Inhalants (poppers, whip-its, nitrous oxide, glue)               | <input type="checkbox"/>      | <input type="checkbox"/> | <input type="checkbox"/>    | <input type="checkbox"/>           |
| Other                                                            | <input type="checkbox"/>      | <input type="checkbox"/> | <input type="checkbox"/>    | <input type="checkbox"/>           |



*Social connectedness item.*

Please circle the image that best describes your current relationship with other human beings, in general.



*Mood item.*

Please circle the image that best represents your current mood.
